# Supplementary material for: The New Version of the ANDDigest Tool with Improved AI-Based Short Names Recognition
Source: MDPI journal article supplement (doi:10.3390/ijms232314934), 2022-11-29

ROC curves illustrating classification accuracy of the fine-tuned models for the selected groups of object types, for the short names only and the names of entities of any length, obtained using the existing Gold Standards, presented in Table 1

## Genes/Proteins

Short Names Only

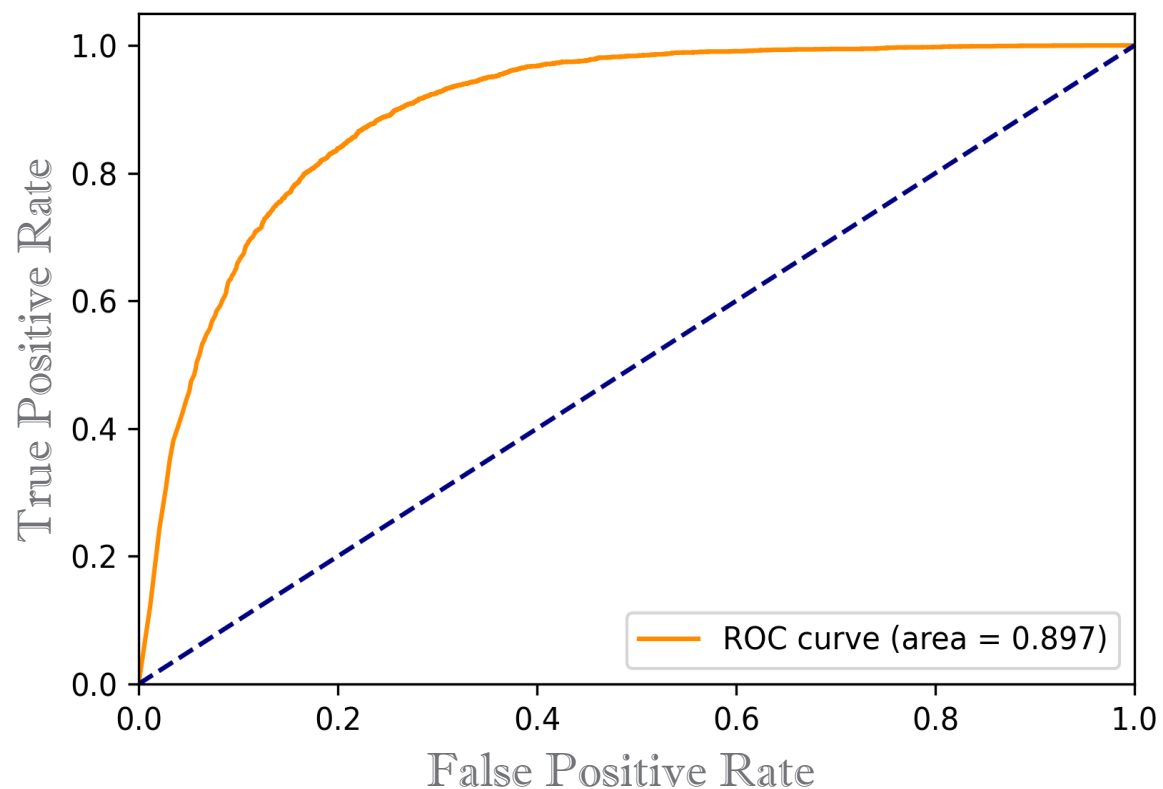

Any Length

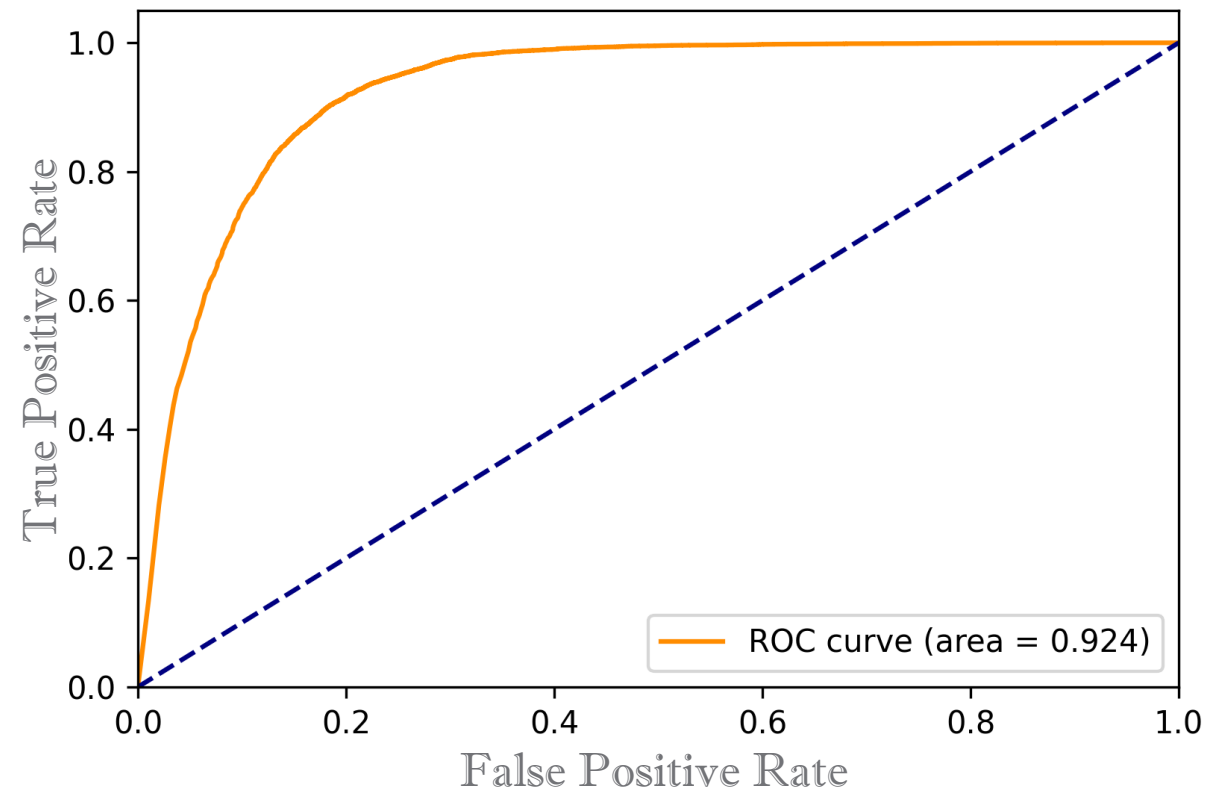

# Drugs/Metabolites

Short Names Only

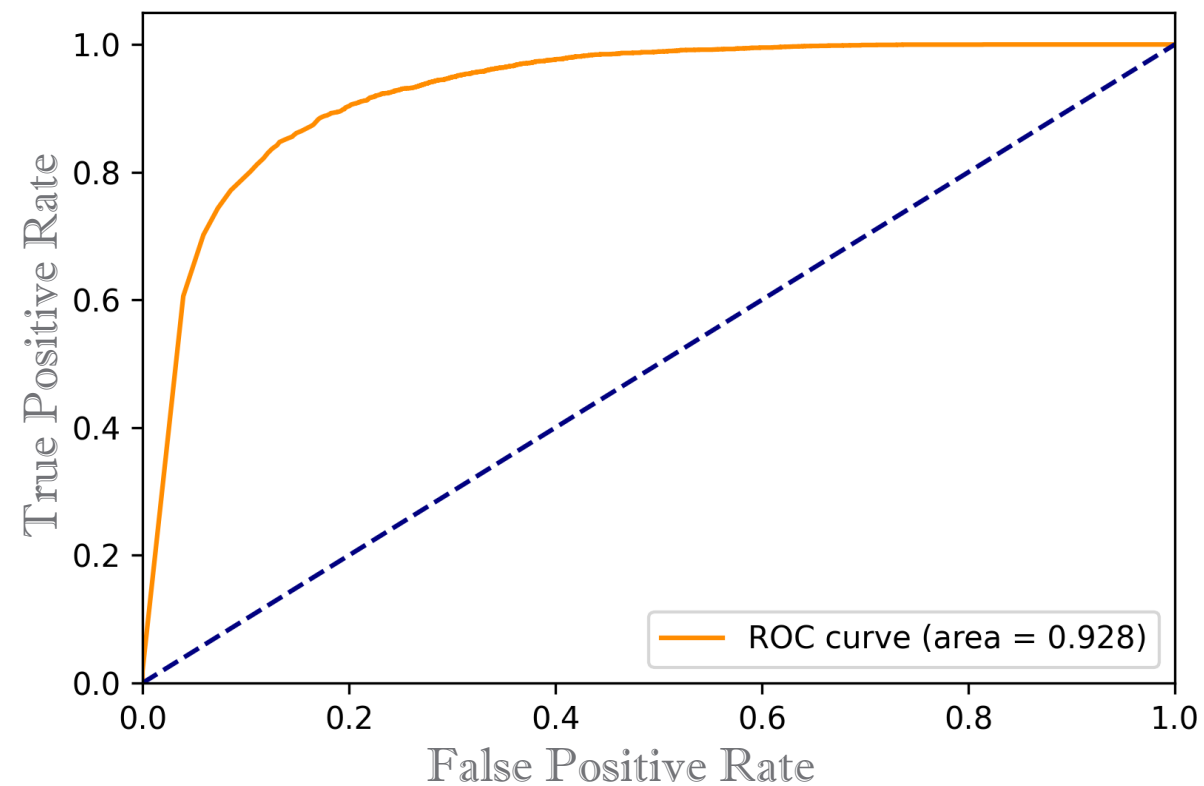

Any Length

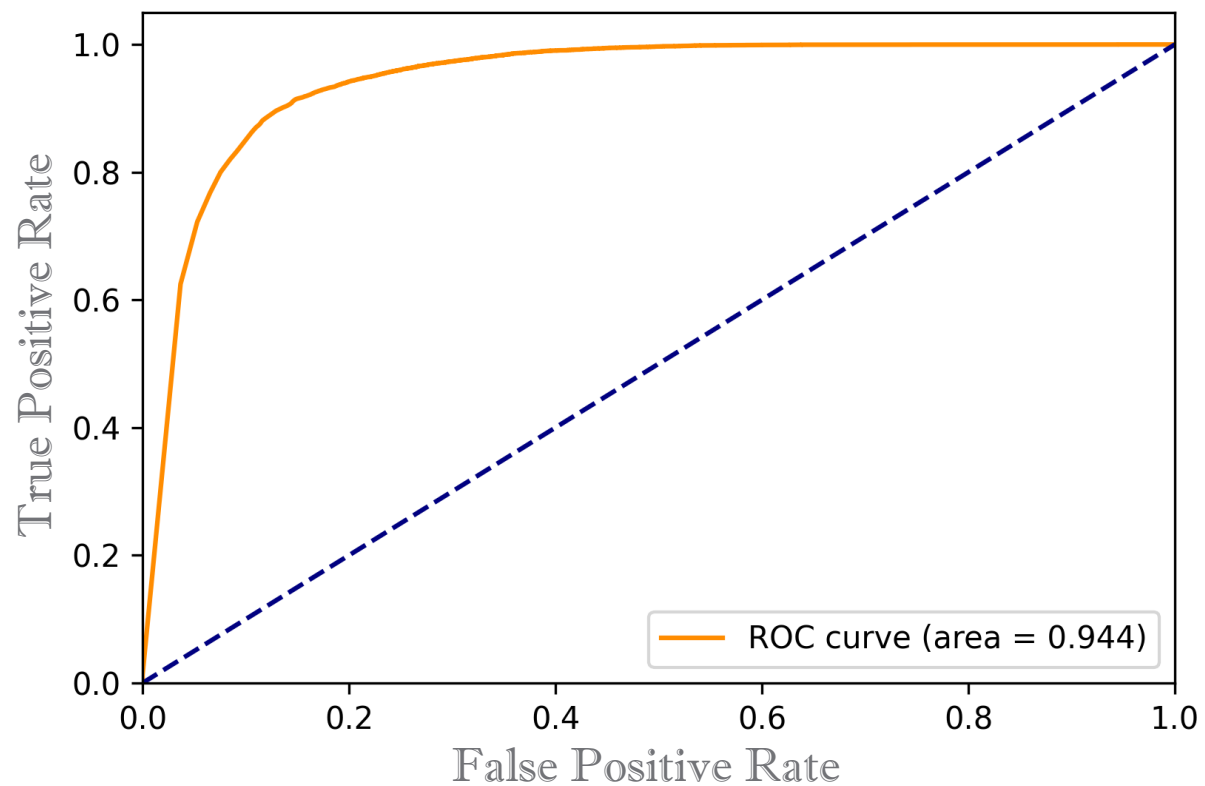

# Pathways

Short Names Only

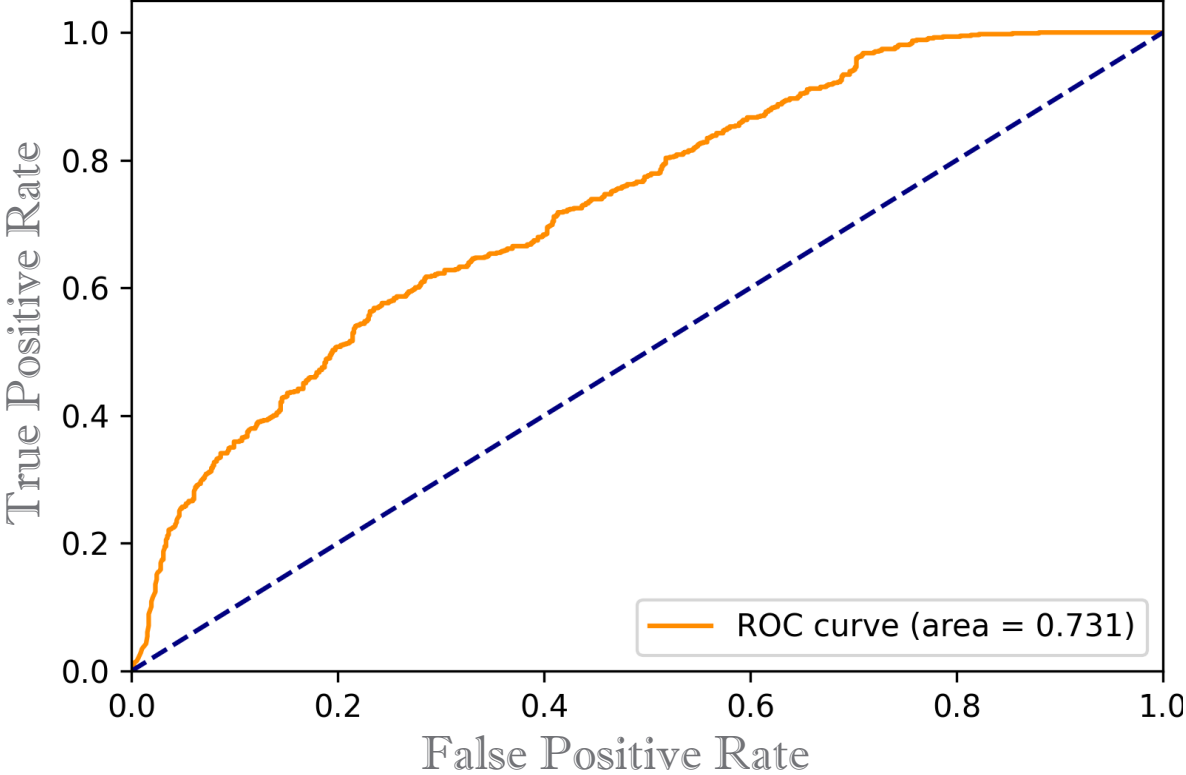

Any Length

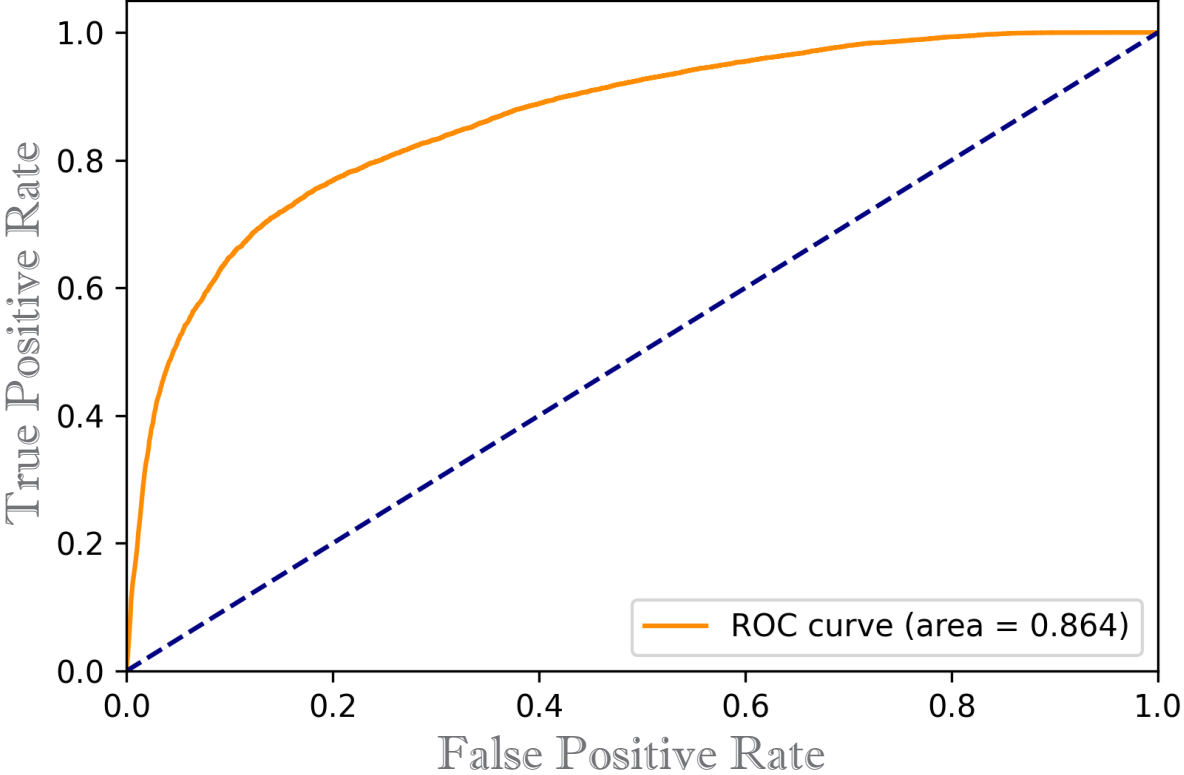

# Cell Components

Short Names Only

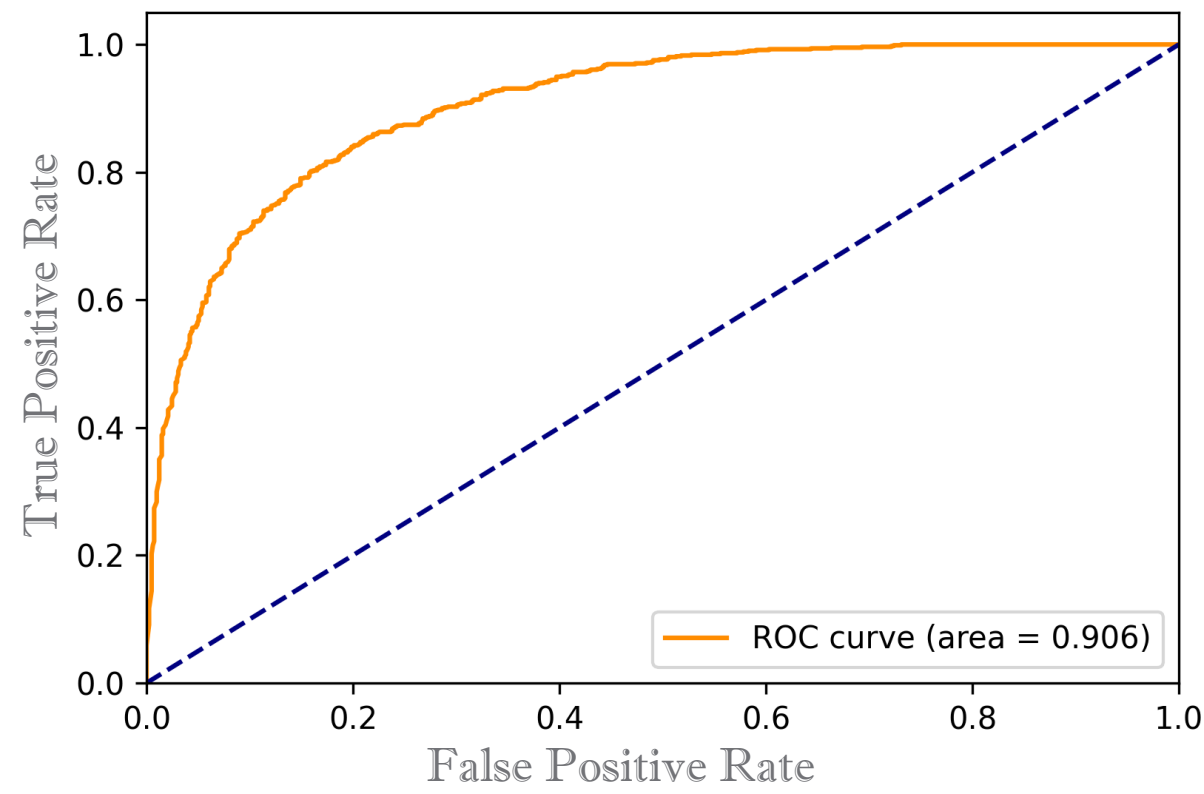

Any Length

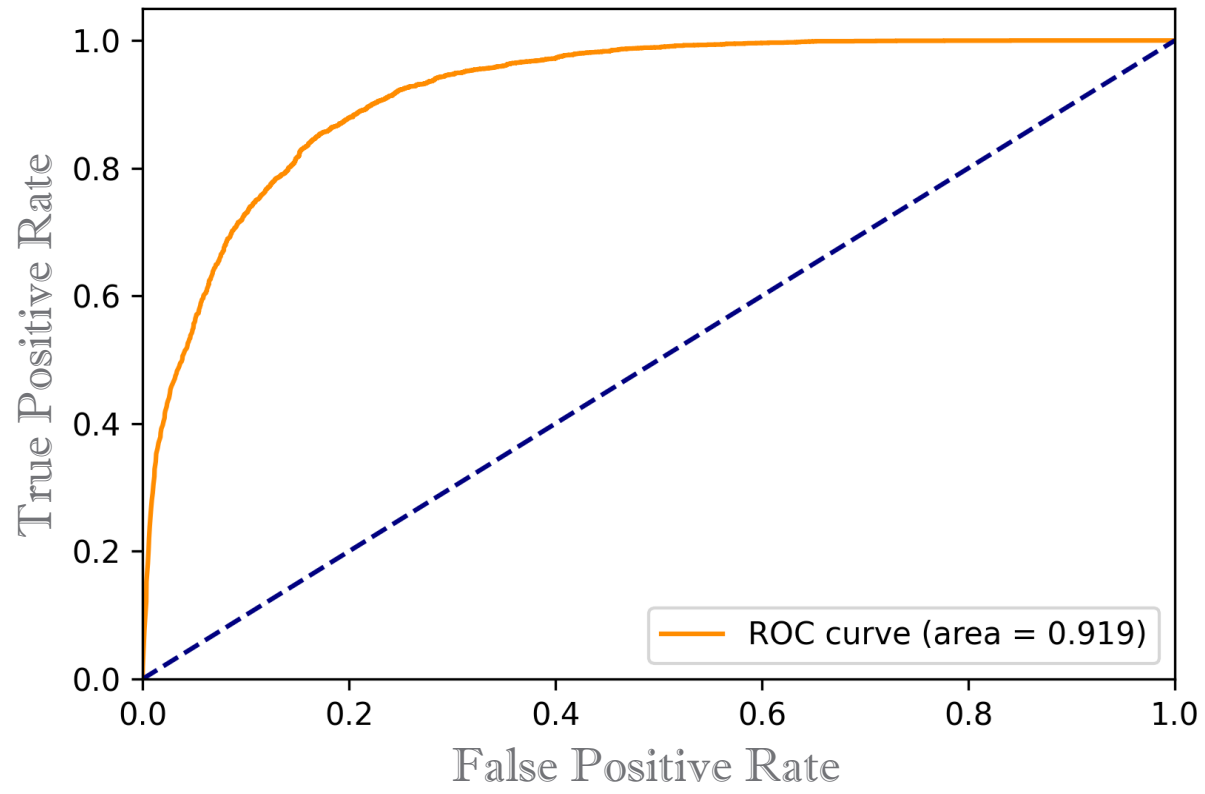

# Diseases/Side Effects

Short Names Only

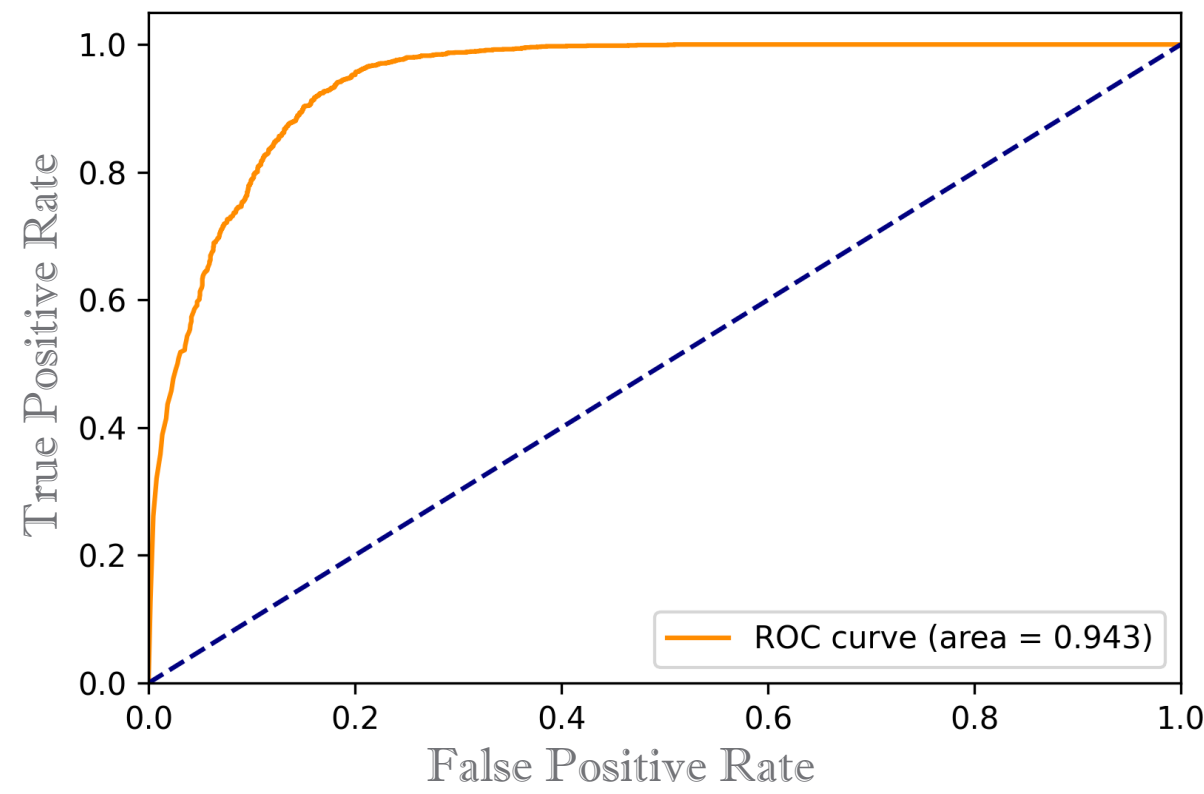

Any Length

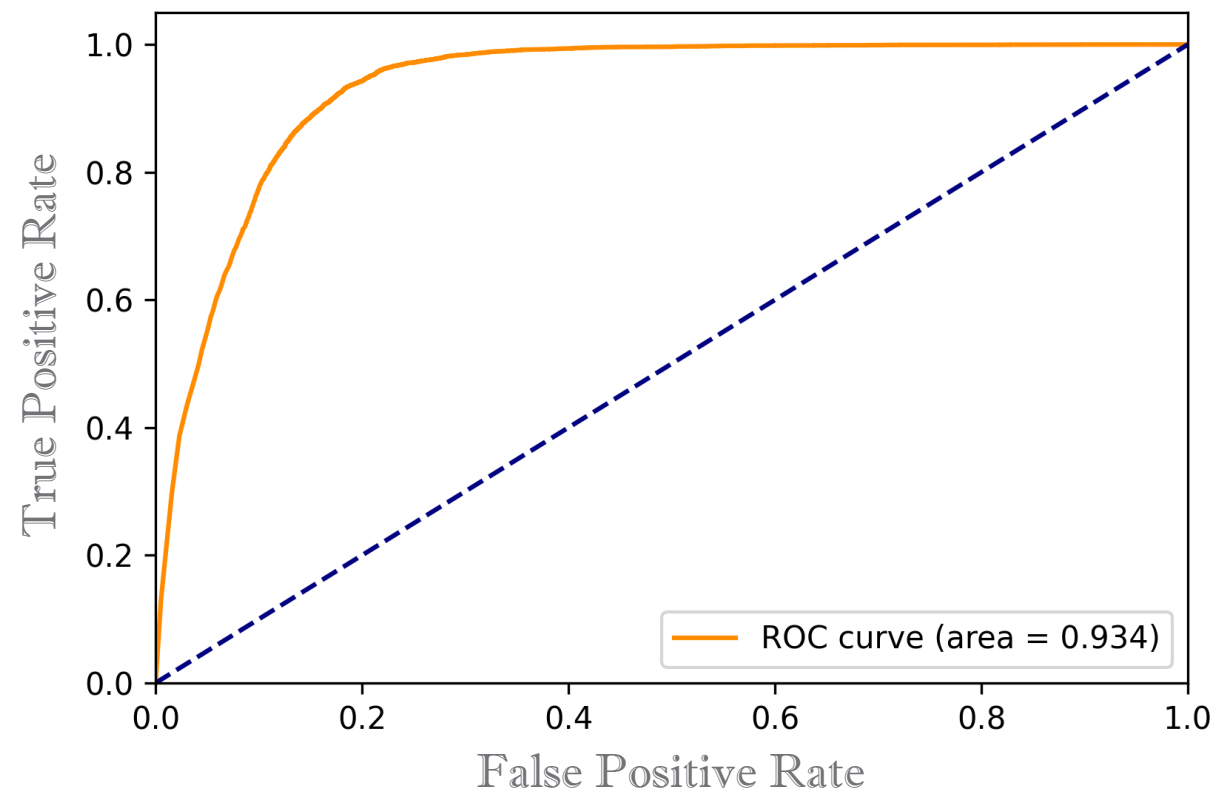

Supplement: s1 [file s1]
