# Supplementary material for: The New Version of the ANDDigest Tool with Improved AI-Based Short Names Recognition
Source: MDPI journal article supplement (doi:10.3390/ijms232314934), 2022-11-29

ROC curves illustrating short names' classification accuracy of the fine-tuned models for the selected groups of object types, after removal of repeating names within the same sentence, obtained using the developed Gold Standard from the Supplementary File S1

## Genes/Proteins

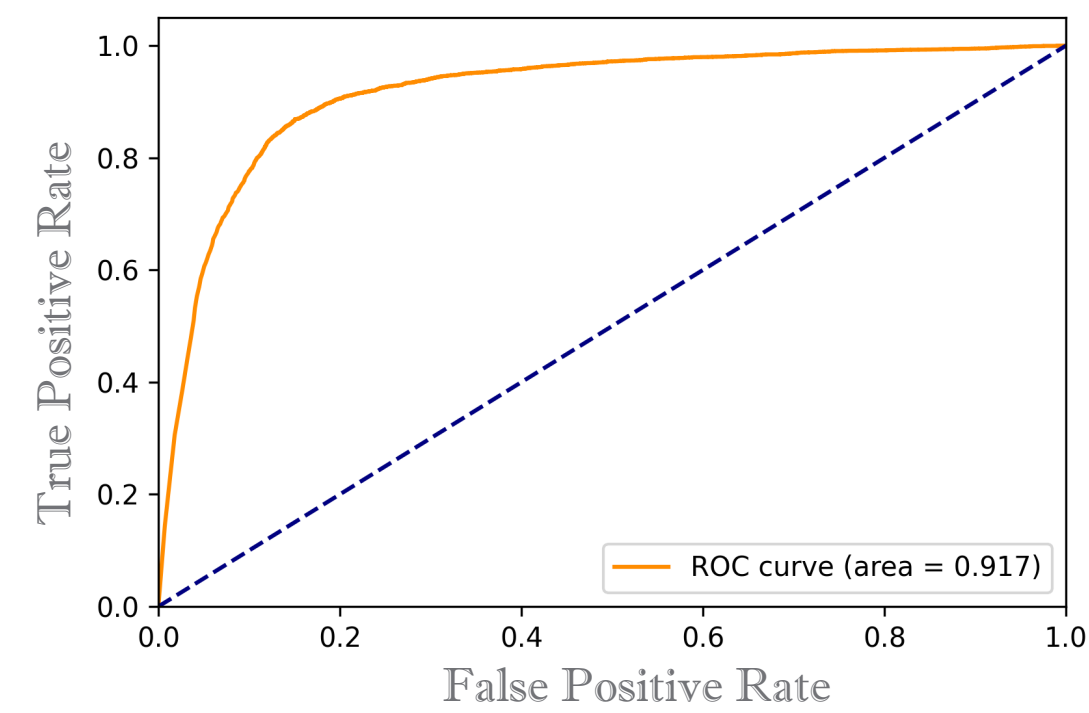

## Drugs/Metabolites

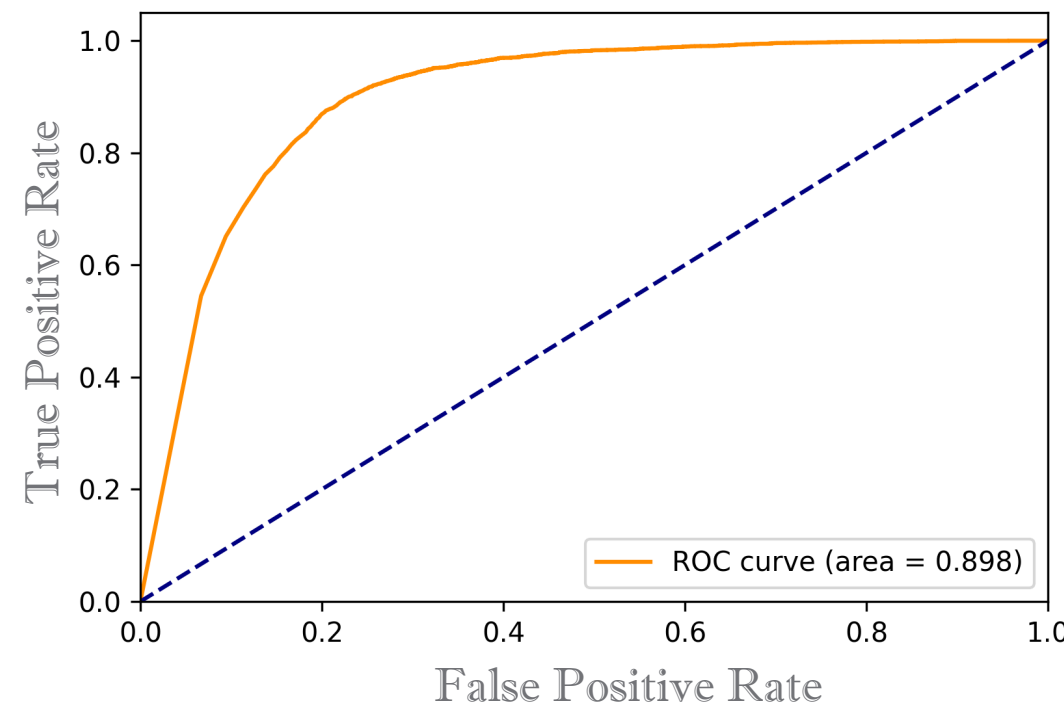

# Diseases/Side Effects

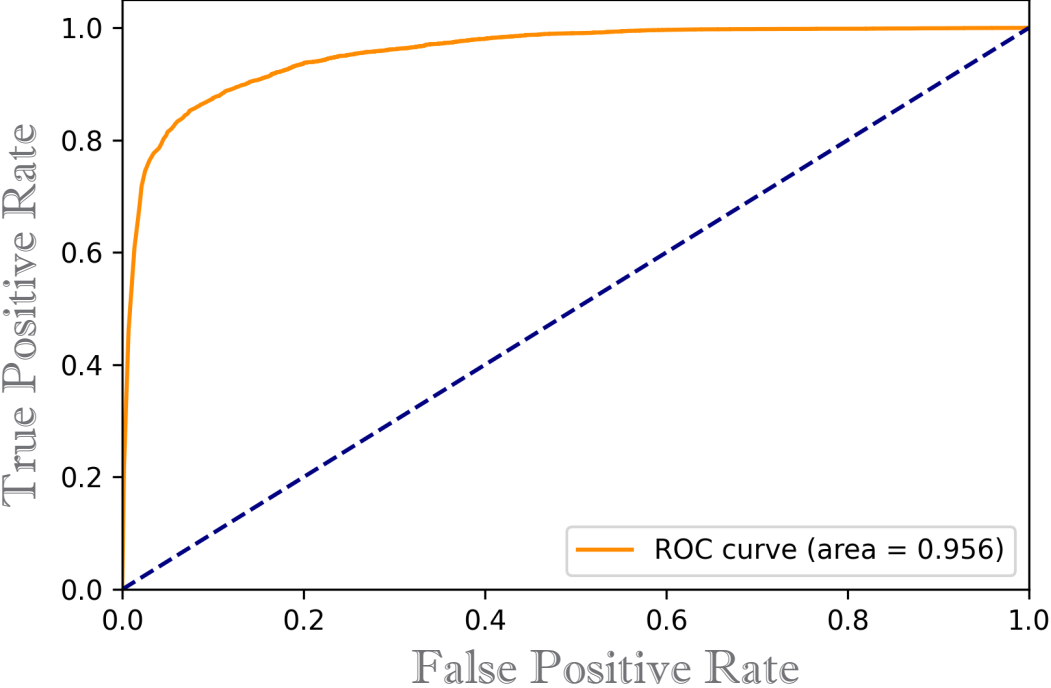

# Pathways

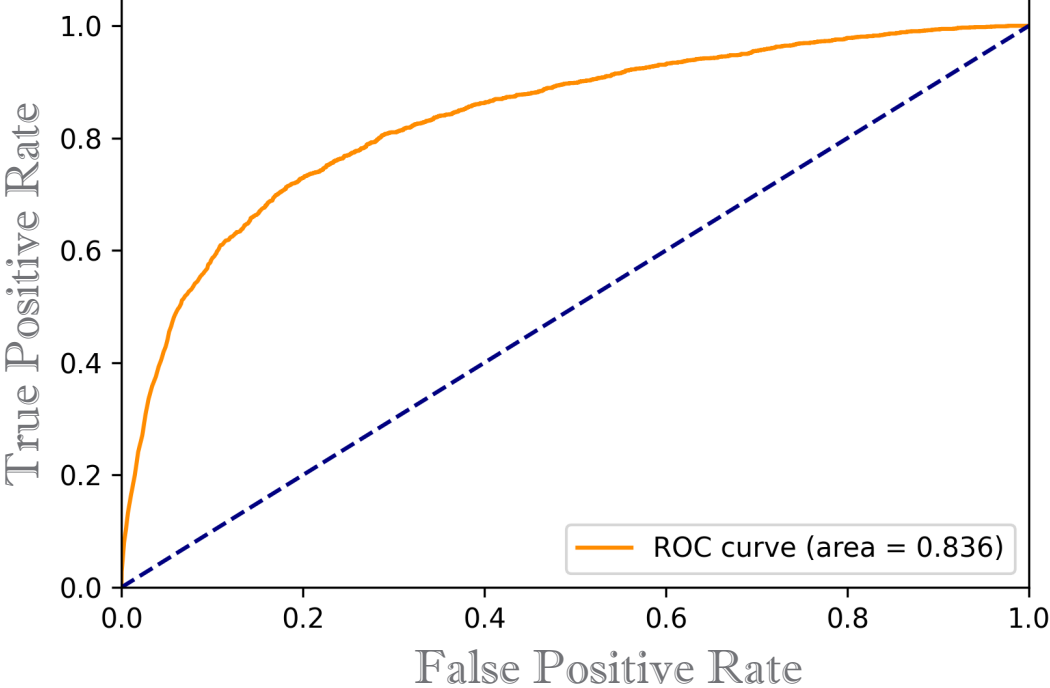

# Cell Components

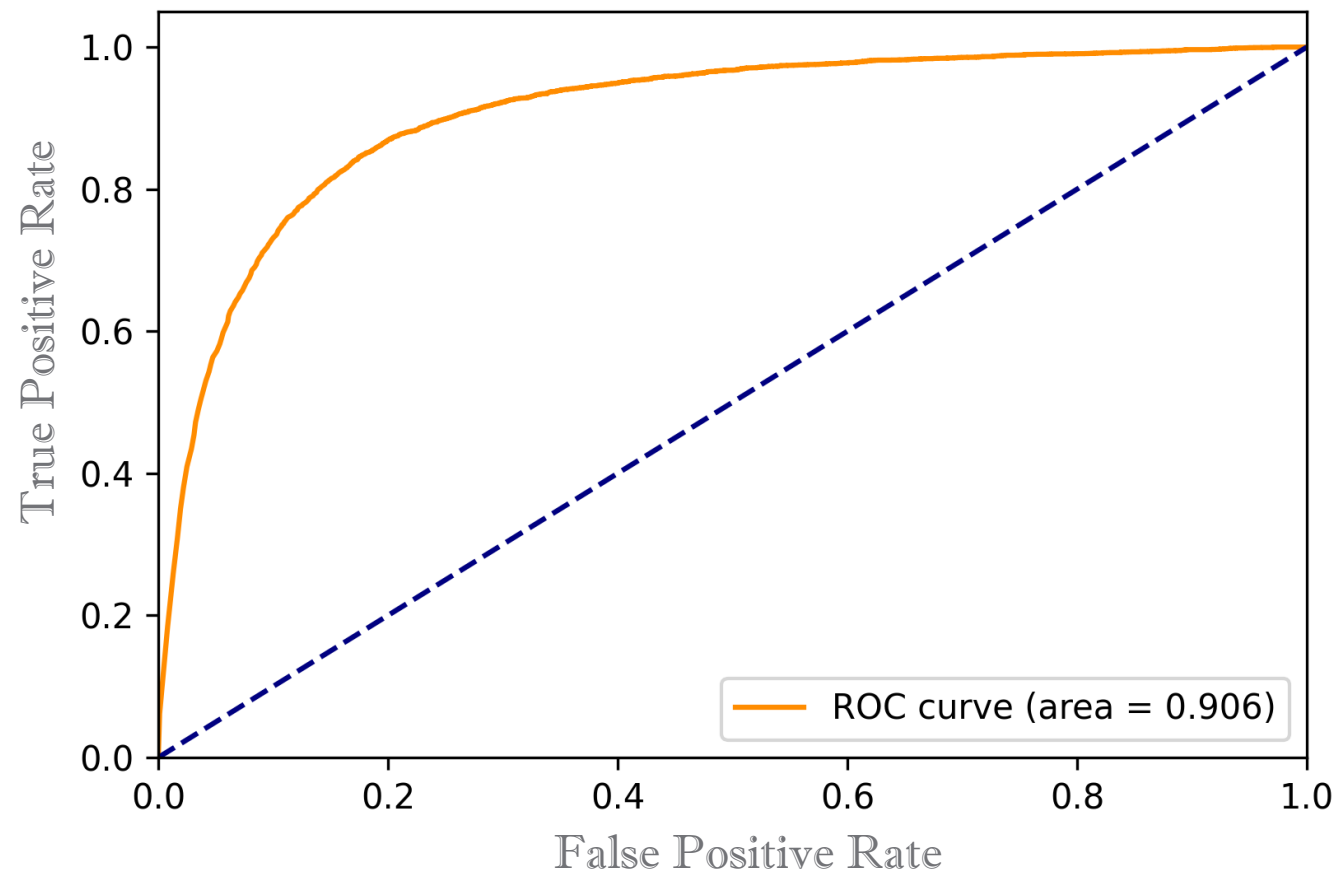

Supplement: s1 [file s1]
