# Supplementary material for: The New Version of the ANDDigest Tool with Improved AI-Based Short Names Recognition
Source: Int J Mol Sci. 2022 Nov 29;23(23):14934. doi: 10.3390/ijms232314934 (PMC9738852; doi:10.3390/ijms232314934)
Supplement: Supplementary file 1 [file ijms-23-14934-s001.zip]

Archive with 10 entries (10 files):
- Supplementary_File_S1.xlsx
- __MACOSX/._Supplementary_File_S1.xlsx
- Supplementary_File_S2.pdf
- __MACOSX/._Supplementary_File_S2.pdf
- Supplementary_File_S3.pdf
- __MACOSX/._Supplementary_File_S3.pdf
- Supplementary_File_S5.xlsx
- __MACOSX/._Supplementary_File_S5.xlsx
- Supplementary_Table_S4.xlsx
- __MACOSX/._Supplementary_Table_S4.xlsx
