# Supplementary material for: The New Version of the ANDDigest Tool with Improved AI-Based Short Names Recognition
Source: Int J Mol Sci. 2022 Nov 29;23(23):14934. doi: 10.3390/ijms232314934 (PMC9738852; doi:10.3390/ijms232314934)
Supplement: Supplementary file 1 [file ijms-23-14934-s001.zip › Supplementary_File_S1.xlsx]

## Sheet: Genes_Proteins
PMID	Year	Sentence	Dictionary Name	Position	True	False
31137599	2019	Materials: Data from patients who underwent FDG PET/CT for suspicion of recurrent urothelial carcinoma between 2007 and 2015 were retrospectively collected in a multicenter study.	FDG	44 47	0	1
31137599	2019	Disease management after the introduction of FDG PET/CT in the diagnostic algorithm was assessed in all patients.	FDG	45 48	0	1
31137599	2019	A Cox regression analysis was used to identify predictors of recurrence and death, for bladder cancer, upper urinary tract carcinoma, and concomitant bladder cancer and upper urinary tract carcinoma.	Cox	2 5	0	1
31137599	2019	Patient management was changed in 114/286 (40%) urothelial carcinoma patients with the inclusion of FDG PET/CT, particularly in those with bladder cancer, reaching 74% (n = 90/122).	FDG	100103	0	1
31137599	2019	At multivariate analysis, in patients with bladder cancer and upper urinary tract carcinoma, a positive FDG PET/CT resulted an independent predictor of disease-free and overall survival (p < 0,01).	FDG	104107	0	1
31137599	2019	Conclusions: FDG PET/CT has the potential to change patient management, particularly for patients with bladder cancer.	FDG	13 16	0	1
31137605	2019	Given the importance of fatty acids in the biosynthesis of mycolic acids and the mycobacterial cell wall, we tested novel amphiphilic C10 and C18 cyclobutene and cyclobutane fatty acid derivatives for Map inhibition.	C10	134137	0	1
31137605	2019	Several of the C18 compounds showed moderate efficacy (MICs 392 to 824 M) against Map, while a higher level of inhibition (MICs 6 to 82 M) was observed for M. tuberculosis for select analogs from both the C10 and C18 groups.	C18	15 18	0	1
31137605	2019	Several of the C18 compounds showed moderate efficacy (MICs 392 to 824 M) against Map, while a higher level of inhibition (MICs 6 to 82 M) was observed for M. tuberculosis for select analogs from both the C10 and C18 groups.	C10	205208	0	1
31137605	2019	Several of the C18 compounds showed moderate efficacy (MICs 392 to 824 M) against Map, while a higher level of inhibition (MICs 6 to 82 M) was observed for M. tuberculosis for select analogs from both the C10 and C18 groups.	C18	213216	0	1
31137614	2019	The histological evaluation of the spinal cord of the females revealed a significant increase in GFAP positivity and a significant decrease in IBA1 positivity.	GFAP	97101	1	0
31137637	2019	We used Cox regression analysis to determine the adjusted hazard ratio for stroke according to lipid-testing interval.	Cox	8 11	0	1
31137637	2019	(3) Results: Compared to patients with lipid-testing intervals of 6 months, patients with >6 to 12 (adjusted hazard ratio 1.32, 95% confidence interval (CI) 1.08-1.61), >12 to 18 (aHR 1.48, 95% CI 1.20-1.82), and >18 (aHR 1.54, 95% CI 1.25-1.90) month testing intervals had elevated risk of total stroke (p for trend <0.001).	aHR	180183	0	1
31137637	2019	(3) Results: Compared to patients with lipid-testing intervals of 6 months, patients with >6 to 12 (adjusted hazard ratio 1.32, 95% confidence interval (CI) 1.08-1.61), >12 to 18 (aHR 1.48, 95% CI 1.20-1.82), and >18 (aHR 1.54, 95% CI 1.25-1.90) month testing intervals had elevated risk of total stroke (p for trend <0.001).	aHR	218221	0	1
31137637	2019	A significant association existed between lipid-testing interval and total and ischemic stroke risk in the >6 to 12 (adjusted hazard ratio 1.62, 95% CI 1.19-2.21), >12 to 18 (aHR 1.87, 95% CI 1.36-2.58), and >18 (aHR 1.79, 95% CI 1.30-2.48) month interval groups, but no significant association existed between lipid-testing interval and hemorrhagic stroke risk.	aHR	175178	0	1
31137637	2019	A significant association existed between lipid-testing interval and total and ischemic stroke risk in the >6 to 12 (adjusted hazard ratio 1.62, 95% CI 1.19-2.21), >12 to 18 (aHR 1.87, 95% CI 1.36-2.58), and >18 (aHR 1.79, 95% CI 1.30-2.48) month interval groups, but no significant association existed between lipid-testing interval and hemorrhagic stroke risk.	aHR	213216	0	1
31137646	2019	The pigs housed in the barren environment showed quicker approach latencies than the enriched-housed pigs (HAT: farm 1: 7.4 1.1 s vs. farm 2: 57.1 1.1 s, respectively, farm 3: 58.3 1.3 s (end of fattening);	HAT	107110	0	1
31137646	2019	The same pattern of behavior was observed for the duration of contacts in the human approach test but not in the novel object test (HAT: farm 1: 83.8 1.1 s vs. farm 2: 6.3 1.1 s, respectively, farm 3: 7.6 1.3 s (end of fattening)).	HAT	132135	0	1
31137652	2019	CXCL-13 serum levels were measured longitudinally, CD20 and CD3 composition and CXCL13 mRNA in tissue were examined by flow cytometry and kidneys were examined by histology and immunohistochemistry.	CD3	60 63	1	0
31137656	2019	Western blotting was used to detect the expression levels of E-cadherin, N-cadherin, vimentin, snail, slug, zinc finger E-box binding homeobox 1 (ZEB1), and twist proteins and the mRNA levels were detected by rt-PCR.	slug	102106	1	0
31137656	2019	In this connection, actinomycin V decreased the snail and slug protein expression, and consequently inhibited cells epithelial-mesenchymal transition procession.	slug	58 62	1	0
31137656	2019	Our results suggest that actinomycin V inhibits EMT-mediated migration and invasion via decreasing snail and slug expression, which exhibits therapeutic potential for the treatment of breast cancer and further toxicity investigation in vivo is needed.	slug	109113	1	0
31137660	2019	At the end of the experimental protocol, diabetic mice showed polyuria (+195.5%), increase in Albumin-to-Creatine Ratio (ACR, +284.7%), and a significant drop in creatinine clearance (p < 0.05).	ACR	121124	0	1
31137660	2019	Bilastine prevented ACR increase and restored creatinine clearance in a dose-dependent manner, suggesting a positive effect on glomerular filtration.	ACR	20 23	0	1
31137663	2019	Wistar rats ran on a treadmill with the speed of 18 m/min for 30 min (M30) or 120 min (M120) or with the speed of 28 m/min for 30 min (F30).	ran	12 15	0	1
31137699	2019	Fumonisin production by F. verticillioides and F. proliferatum representative strains was analysed, showing that all strains produced FB1.	FB1	134137	0	1
31137740	2019	Although expression of Bim, Bcl-2 and Cytochrome C showed alterations.	Bim	23 26	1	0
31137742	2019	Western-Type Helicobacter pylori CagA are the Most Frequent Type in Mongolian Patients.	CagA	33 37	1	0
31137742	2019	Helicobacter pylori infection possessing East-Asian-type CagA is associated with carcinogenesis.	CagA	57 61	1	0
31137742	2019	Therefore, we evaluated the CagA status in the Mongolian population.	CagA	28 32	1	0
31137742	2019	The CagA subtypes (East-Asian-type or Western-type, based on sequencing of Glu-Pro-Ile-Tyr-Ala (EPIYA) segments) and vacA genotypes (s and m regions) were determined using PCR-based sequencing and PCR, respectively.	CagA	4 8	1	0
31137742	2019	The CagA subtypes (East-Asian-type or Western-type, based on sequencing of Glu-Pro-Ile-Tyr-Ala (EPIYA) segments) and vacA genotypes (s and m regions) were determined using PCR-based sequencing and PCR, respectively.	vacA	117121	1	0
31137742	2019	In the gastritis group, 78.6% (268/341) had Western-type CagA, 2.9% (10/341) had East-Asian-type, and 18.2% (61/341) were cagA-negative.	CagA	57 61	1	0
31137742	2019	However, all H. pylori from gastric cancer patients possessed Western-type CagA.	CagA	75 79	1	0
31137742	2019	Histological analyses showed that East-Asian-type CagA was the most virulent strains, followed by Western-type and cagA-negative strains.	CagA	50 54	1	0
31137742	2019	However, the fact that different CagA types can explain the high incidence of gastric cancer might be inapplicable in Mongolia.	CagA	33 37	1	0
31137743	2019	POLQ Overexpression Is Associated with an Increased Somatic Mutation Load and polo like kinase 4 Overexpression in Lung Adenocarcinoma.	POLQ	0 4	1	0
31137743	2019	In the present study, we examined whether abnormal POLQ expression may be involved in the pathogenesis of lung adenocarcinoma .	POLQ	51 55	1	0
31137743	2019	First, we found overexpression of POLQ at both the mRNA and protein levels in lung adenocarcinoma, using data from the Cancer Genome Atlas database and by immunohistochemical analysis of our lung adenocarcinoma series.	POLQ	34 38	1	0
31137743	2019	POLQ overexpression was associated with an advanced pathologic stage and an increased total number of somatic mutations in lung adenocarcinoma.	POLQ	0 4	1	0
31137743	2019	When H1299 human lung cancer cell clones overexpressing POLQ were established and examined, the clones showed resistance to a DSB-inducing chemical in the clonogenic assay and an increased frequency of mutations in the supF forward mutation assay.	POLQ	56 60	1	0
31137743	2019	Further analysis revealed that POLQ overexpression was also positively correlated with Polo Like Kinase 4 overexpression in lung adenocarcinoma, and that polo like kinase 4 overexpression in the POLQ-overexpressing H1299 cells induced centrosome amplification.	POLQ	31 35	1	0
31137743	2019	Finally, analysis of the the cancer genome atlas data revealed that POLQ overexpression was associated with an increased somatic mutation load and polo like kinase 4 overexpression in diverse human cancers;	POLQ	68 72	1	0
31137743	2019	On the other hand, overexpressions of nine TLS polymerases other than POLQ were associated with an increased somatic mutation load at a much lower frequency.	POLQ	70 74	1	0
31137743	2019	Thus, POLQ overexpression is associated with advanced pathologic stage, increased somatic mutation load, and polo like kinase 4 overexpression, the last inducing centrosome amplification, in lung adenocarcinoma, suggesting that POLQ overexpression is involved in the pathogenesis of lung adenocarcinoma.	POLQ	6 10	1	0
31137743	2019	Thus, POLQ overexpression is associated with advanced pathologic stage, increased somatic mutation load, and polo like kinase 4 overexpression, the last inducing centrosome amplification, in lung adenocarcinoma, suggesting that POLQ overexpression is involved in the pathogenesis of lung adenocarcinoma.	POLQ	228232	1	0
31137782	2019	Our previous study showed that a polysaccharide isolated from Radix Astragali, named RAP, was itself non-cytotoxic but induced RAW264.7 cells' cytotoxicity against cancer cells.	RAP	85 88	0	1
31137782	2019	Series studies was conducted to show that RAP is able to induce much higher gene expression of M1 markers, including iNOS, IL-6, TNF-a, and CXCL10, compared with the control group.	RAP	42 45	0	1
31137782	2019	Series studies was conducted to show that RAP is able to induce much higher gene expression of M1 markers, including iNOS, IL-6, TNF-a, and CXCL10, compared with the control group.	iNOS	117121	1	0
31137782	2019	Further studies indicated that RAP induces the Notch signaling pathway in RAW264.7 cells.	RAP	31 34	0	1
31137801	2019	The most common hepatitis c virus genotype was GT1 (63%).	GT1	47 50	0	1
31137826	2019	The staining of inflammatory and angiogenic factors was significantly decreased and related to a down-expression of Cox-2, Il-1beta, and Vegf.	Vegf	137141	1	0
31137829	2019	We present three novel nanobodies, termed Nb1, Nb5, and Nb38, that recognize human CCR7 without interfering with G-protein-coupling and downstream signaling.	Nb1	42 45	0	1
31137829	2019	Moreover, we were able to follow CCR7 trafficking upon CCL19 triggering using Nb1, Nb5, and Nb38.	Nb1	78 81	0	1
31137840	2019	For the quantitative trait locus interval, 95% probability lay within a 7.24-7.56 Mbp interval.	Mbp	82 85	0	1
31137846	2019	Hence, the direct targeting of Gli could be a more effective strategy for achieving disease modification compared to smoothened antagonism.	Gli	31 34	1	0
31137853	2019	The six pressure detection points and one temperature and humidity detection point in our newly designed system can accurately measure the pressure, temperature, and humidity inside the cast, and instantly display the corresponding information by mobile APP.	APP	254257	0	1
31137863	2019	METHODS: A cohort of 710 patients with community-acquired pneumonia admitted to the intensive care units at Hospital of Matar and Parc Taul Hospital of Sabadell was retrospectively analyzed.	Parc	130134	0	1
31137870	2019	Our technology showed increased skin antioxidant activity following topical application of reduced coeznyme Q10 cream or vitamin C intake as orange juice or supplements.	Q10	108111	0	1
31137873	2019	In addition, nanomelanin might indirectly induce apoptosis in tumor tissues via activation of tumor necrosis factor alpha, Bax, and Caspase-3 genes.	Bax	123126	1	0
31137877	2019	The overexpression of MnMYB3R1 in tobacco upregulated the expression of the tobacco PPO gene.	PPO	84 87	1	0
31137877	2019	This observation as well as the quantitative real-time PCR results implied that MnMYB3R1 and PPO are involved in the abscisic acid-responsive stress response pathway.	PPO	93 96	1	0
31137879	2019	Ten and 13 HECT genes were respectively identified in B. rapa and B. oleracea and then resolved into seven groups along with their Arabidopsis orthologs by phylogenetic analysis.	rapa	57 61	0	1
31137891	2019	Relative changes in oxygenated ( delta HbO 2 ), reduced ( delta HHb) and total ( delta tHb) haemoglobin were estimated from the PPG signals and the trends were compared with reference Near Infrared Spectroscopy measurements.	tHb	87 90	0	1
31137891	2019	Delta HbO 2, delta HHb and delta tHb estimated from the forehead PPGs trended well with the same parameters from the reference near infrared spectroscopy.	tHb	33 36	0	1
31137897	2019	Furthermore, the potential of these techniques is reviewed and critiqued by looking into agricultural activities involving palm oil, rubber, and agro-food crops.	palm	123127	0	1
31137905	2019	Serology tests of the serum to detect herpes simplex virus 1/2 IgG and IgM were performed.	IgM	71 74	1	0
31137908	2019	We demonstrate that all three REX proteins are expressed in L. lactis cells and are efficiently displayed on the bacterial surface, as tested by flow cytometry using an anti-FLAG antibody conjugate.	REX	30 33	1	0
31137908	2019	To confirm that the FLAG/non-FLAG REX proteins displayed by L. lactis retain their binding specificity, cell-surface interactions of REX proteins with an IL-23R-IgG chimera were demonstrated by flow cytometry.	REX	34 37	1	0
31137908	2019	To confirm that the FLAG/non-FLAG REX proteins displayed by L. lactis retain their binding specificity, cell-surface interactions of REX proteins with an IL-23R-IgG chimera were demonstrated by flow cytometry.	REX	133136	1	0
31137909	2019	We acquired diffusion MRI data from 18 patients in chronic disorders of consciousness (11 vegetative state/unresponsive wakefulness syndrome, 7 MCS) and 14 healthy controls.	MCS	144147	0	1
31137913	2019	Group II (two strains) possessed bph and sal genes similar to the ones in KF707, but these strains lacked the bphX region between bphC and bphD, which is involved in the downstream catabolism of biphenyl.	bphC	130134	1	0
31137913	2019	Group II (two strains) possessed bph and sal genes similar to the ones in KF707, but these strains lacked the bphX region between bphC and bphD, which is involved in the downstream catabolism of biphenyl.	bphD	139143	1	0
31137921	2019	To this end, we used protein intensity profiles of eleven human HCCs to parameterize tumor-specific kinetic models of cellular lipid metabolism including formation, enlargement, and degradation of lipid droplets .	HCCs	64 68	0	1
31137921	2019	The majority of HCCs show a reduced uptake of fatty acids and decreased rate of beta-oxidation, however, some HCCs display a completely different metabolic phenotype characterized by high rates of beta-oxidation.	HCCs	16 20	0	1
31137921	2019	The majority of HCCs show a reduced uptake of fatty acids and decreased rate of beta-oxidation, however, some HCCs display a completely different metabolic phenotype characterized by high rates of beta-oxidation.	HCCs	110114	0	1
31137921	2019	Despite reduced fatty acid uptake in the majority of HCCs, the content of triacylglycerol is significantly enlarged compared to the tumor-adjacent tissue.	HCCs	53 57	0	1
31137921	2019	Our simulations suggest that HCCs characterized by a very high content of triglycerides comprise regulatory peculiarities that render them susceptible to selective drug targeting without affecting healthy tissue.	HCCs	29 33	0	1
31137965	2019	Results: We identified mutations in genes conferring resistance to cephalosporins, macrolides, fluoroquinolones through por and tbpB loci, and we reported new combinations of already known alleles.	por	120123	1	0
31137990	2019	This study aims to determine the proportions of influenza and noninfluenza viruses among SARI patients and to determine the severity of SARI and its associated factors.	SARI	89 93	0	1
31137990	2019	This study aims to determine the proportions of influenza and noninfluenza viruses among SARI patients and to determine the severity of SARI and its associated factors.	SARI	136140	0	1
31137990	2019	The data of SARI patients who were admitted to SARI surveillance sites at Al Johory hospital in Sana'a and Al Wahdah hospital in Aden city during the period 2011-2016 were analyzed.	SARI	12 16	0	1
31137990	2019	The proportions of positive influenza viruses (type A, B) and noninfluenza viruses (respiratory syncytial, adenovirus, human parainfluenza, and human metapneumovirus), intensive care unit admission rate, and fatality rate among SARI patients were calculated.	SARI	228232	0	1
31137990	2019	A total of 1811 of SARI patients were admitted during 2011-2016.	SARI	19 23	0	1
31137990	2019	SARI patients in Yemen had a high intensive care unit admission and case-fatality rates.	SARI	0 4	0	1
31137990	2019	Expanding surveillance sites and panel of laboratory tests to involve other pathogens will help to provide accurate diagnosis for SARI etiology and give more comprehensive picture.	SARI	130134	0	1
31137990	2019	Training staff for SARI case management will help to reduce severe outcomes.	SARI	19 23	0	1
31137995	2019	Hematopoietic microenvironments have been extensively studied, especially focusing on regulation of hematopoietic stem cells in HSC niche following progress of molecular biology in resent years.	HSC	128131	0	1
31138041	2019	Clostridium difficile ribotype 017 is an important toxigenic C. difficile ribotype which, due to a deletion in the repetitive region of the tcdA gene, only produces functional toxin B.	tcdA	140144	1	0
31138045	2019	Analysis revealed statistically significant associations between lesion location and body weight (palatal and tongue lesions were more likely in smaller dogs, whereas lesions in the other category [lip or mucosa] were more likely in larger dogs).	lip	198201	0	1
31138083	2019	The molecular mechanism underlying apoptotic pathway activation was elucidated through Western blot analysis of caspase-8, caspase-3, and PARP proteins.	PARP	138142	1	0
31138106	2019	BACKGROUND: We have previously identified 11 promising candidate genes for milk composition traits by resequencing the whole genomes of 8 Holstein bulls with extremely high and low estimated breeding values for milk protein and fat percentages (high and low groups), including FCGR2B, CENPE, RETSAT, ACSBG2, NFKB2, TBC1D1, NLK, MAP3K1, SLC30A2, ANGPT1 and UGDH those contained 25 indels between high…	NLK	323326	1	0
31138106	2019	BACKGROUND: We have previously identified 11 promising candidate genes for milk composition traits by resequencing the whole genomes of 8 Holstein bulls with extremely high and low estimated breeding values for milk protein and fat percentages (high and low groups), including FCGR2B, CENPE, RETSAT, ACSBG2, NFKB2, TBC1D1, NLK, MAP3K1, SLC30A2, ANGPT1 and UGDH those contained 25 indels between high…	UGDH	356360	1	0
31138106	2019	Significant associations were shown between indels in NLK and protein yield and protein percentage (P = 0.0012 to 0.0257);	NLK	54 57	1	0
31138106	2019	Variant in UGDH was related to the milk yield (P = 0.0312).	UGDH	11 15	1	0
31138107	2019	Because only a tiny fraction of cancer-specific neoepitopes actually elicits immune response, selection of potent, immunogenic neoepitopes remains a challenging step in cancer vaccine development.	tiny	15 19	0	1
31138129	2019	Hot-spots and clustering of poor tuberculosis treatment outcomes were detected in districts near the international borders in Afar, Gambelia, and Somali regions and cold spots were detected in Oromia and Amhara regions.	Afar	126130	0	1
31138133	2019	A survival analysis using a time-dependent Cox regression analysis was performed to examine the association between time-varying long-term care service type and hip fracture.	Cox	43 46	0	1
31138134	2019	RESULTS: Of 395 patients included in this post-hoc analysis, 240 patients (60.8%) had 'confirmed' proven (9/240, 3.8%) or probable (231/240, 96.3%) invasive aspergillosis (cIA) and 155 patients (39.2%) had 'non-confirmed' invasive aspergillosis (all nIA; all possible IA (de Pauw et al., Clin Infect Dis 46:1813-21, 2008)).	Dis	300303	0	1
31138145	2019	Myocardial hydroxyproline concentration and gene expression of ANP, Serca 2a, and alpha- and beta-myosin heavy chain did not differ between groups.	ANP	63 66	0	1
31138160	2019	Attributable and population attributable risks (AR, PAR) for pasung were calculated.	PAR	52 55	0	1
31138160	2019	Patient's aggressive or violent behavior (PAR = 44.3%) and unemployment in the family (PAR = 49.3%) were the predominant factors of pasung.	PAR	42 45	0	1
31138160	2019	Patient's aggressive or violent behavior (PAR = 44.3%) and unemployment in the family (PAR = 49.3%) were the predominant factors of pasung.	PAR	87 90	0	1
31138162	2019	The purpose of this study was to evaluate the expression and localization of CD8, FoxP3, PD-1, and PD-L1 in primary tumor tissues and their effects on prognosis of stage IV M0 locally advanced nasopharyngeal carcinoma patients.	CD8	77 80	1	0
31138162	2019	Tumor biopsies from primary lesion were analyzed for the expression and localization of CD8, FoxP3, PD-1, and PD-L1 by immunohistochemistry.	CD8	88 91	1	0
31138165	2019	Intervention dyads will receive intervention, whose contents are based on the health belief model, via multiple forms of media including PowerPoint presentation, video clip and health information booklet.	clip	168172	0	1
31138168	2019	No one was observed to wash hands with soap/soapy water.	wash	23 27	0	1
31138168	2019	Foaming soap dispenser caps were cracked in 31% of all observations, but were typically still functional.	caps	23 27	0	1
31138169	2019	The regulatory function of miR-188-5p on Wnt/beta-catenin signaling activation through directly targeting PTEN was proven using quantitative real-time PCR, western blot analysis, a dual-luciferase assay, a Transwell assay, and immunofluorescence.	PTEN	106110	1	0
31138169	2019	Moreover, miR-188-5p was negatively correlated with PTEN expression but positively correlated with nuclear beta-catenin staining in gastric cancer samples.	PTEN	52 56	1	0
31138198	2019	A structured interview form was used covering the following variables: age, gender, marital status, educational level, presence of dental prosthesis, smoking and Qat chewing habits as independent variables, along with questions on "perceived oral health (POH)" and "perceived general health (PGH)" as dependent variables.	POH	255258	0	1
31138198	2019	Younger age (compared to elders), high education levels (compared to primary education) and being single (compared to married) significantly revealed better levels of POH, while high education levels and being females significantly revealed better levels of PGH.	POH	167170	0	1
31138198	2019	The age, marital status and education were independent determinants of POH, while the gender and education were independent determinants of PGH.	POH	71 74	0	1
31138199	2019	Forty-two of the isolates (66.7%) were positive for all chiA, luxR and vhpA, the virulence genes produced by pathogenic V. harveyi.	chiA	56 60	1	0
31138199	2019	A total of 62 Vibrio isolates (98%) had tlh gene of V. parahaemolyticus, while flaC gene of V. anguillarum was detected in 43 of isolates (68%).	tlh	40 43	1	0
31138199	2019	Other virulence genes, including tdh, trh, hlyA and toxRvc were absent from any of the isolates.	tdh	33 36	1	0
31138199	2019	Other virulence genes, including tdh, trh, hlyA and toxRvc were absent from any of the isolates.	trh	38 41	1	0
31138214	2019	The aim of this study was to determine a potential role of lymphoid tissue inducer and TH17 cells in the process of B cell aggregate formation in the MP4 model.	MP4	150153	1	0
31138231	2019	The levels of TNF-alpha and IL-1beta, MPO activity, and histopathology were assessed on the 40th day.	MPO	38 41	1	0
31138231	2019	TNF-alpha, IL-1beta, MPO activity, and epidermal/dermal thickness increased in the infected paw, which confirmed the peripheral inflammation at the primary foci of this infection.	MPO	21 24	1	0
31138231	2019	A time course of GFAP, Iba-1, and CX3CR1 mRNA expression indicated spinal activation of astrocytes and microglia, which was confirmed at the GFAP and Iba-1 protein level at the peak of mRNA expression (30th day).	GFAP	17 21	1	0
31138231	2019	A time course of GFAP, Iba-1, and CX3CR1 mRNA expression indicated spinal activation of astrocytes and microglia, which was confirmed at the GFAP and Iba-1 protein level at the peak of mRNA expression (30th day).	GFAP	141145	1	0
31138231	2019	Targeting astrocytes, microglia and NFkappaB diminished L. amazonensis-induced GFAP, Iba-1, TNF-alpha, IL-1beta, CX3CR1 and CX3CL1 mRNA expression, and NFkappaB activation in the spinal cord at the peak of spinal cord glial cells activation.	GFAP	79 83	1	0
31138260	2019	PC9, PC9T790M and HCC827 cell lines were employed to test the efficacy of osimertinib and chemotherapy combination in vitro.	PC9	0 3	0	1
31138260	2019	In vitro studies demonstrated the stronger efficacy of the combination over the single treatments in inhibiting cell proliferation and inducing cell death in PC9T790M cells as well as in T790M negative PC9 and HCC827 cell lines, suggesting the potential role of this strategy also as first-line treatment.	PC9	202205	0	1
31138275	2019	Generalist host species drive Trypanosoma cruzi vector infection in oil palm plantations in the Orinoco region, Colombia.	palm	72 76	0	1
31138275	2019	BACKGROUND: Oil palm plantation establishment in Colombia has the potential to impact Chagas disease transmission by increasing the distribution range of Rhodnius prolixus.	palm	16 20	0	1
31138275	2019	The aim of this study is to understand T. cruzi infection in vectors in oil palm plantations relative to community composition and host dietary specialization by analyzing vector blood meals and comparing these results to vectors captured in a native palm tree species, Attalea butyracea.	palm	76 80	0	1
31138275	2019	The aim of this study is to understand T. cruzi infection in vectors in oil palm plantations relative to community composition and host dietary specialization by analyzing vector blood meals and comparing these results to vectors captured in a native palm tree species, Attalea butyracea.	palm	251255	0	1
31138275	2019	CONCLUSIONS: Oil palm plantations and A. butyracea palms found in altered areas provide a similar quality habitat for R. prolixus populations in terms of blood meal availability.	palm	17 21	0	1
31138275	2019	Both habitats showed similarities in vector infection rate and potential host species, representing a single T. cruzi transmission scenario at the introduced oil palm plantation and native Attalea palm interface.	palm	162166	0	1
31138275	2019	Both habitats showed similarities in vector infection rate and potential host species, representing a single T. cruzi transmission scenario at the introduced oil palm plantation and native Attalea palm interface.	palm	197201	0	1
31138291	2019	Analyses of effect factors associated with the postoperative dissatisfaction of patients undergoing open-door laminoplasty for cervical OPLL: a retrospective cohort study.	OPLL	136140	0	1
31138291	2019	OBJECTIVES: This study aimed to investigate the effect factors associated with the postoperative dissatisfaction of patients undergoing open-door laminoplasty for cervical OPLL.	OPLL	172176	0	1
31138291	2019	METHODS: In this study, 194 patients, who underwent open-door laminoplasty for cervical OPLL from January 2009 to January 2016, were retrospectively reviewed.	OPLL	88 92	0	1
31138291	2019	CONCLUSIONS: Overall, to patients undergoing open-door laminoplasty for cervical OPLL, hospitalization cost and neck pain might be mainly associated with patient dissatisfaction at the early and middle recovery.	OPLL	81 85	0	1
31138313	2019	For mothers who sell sex and are at increased HIV acquisition risk, timely and routine antenatal care seeking is especially vital for prevention of vertical transmission.	sell	16 20	0	1
31138313	2019	Given limited antiretroviral therapy coverage among participants, addressing the broader sexual and reproductive health and rights needs of mothers who sell sex has important implications for preventing vertical transmission of HIV.	sell	152156	0	1
31138329	2019	These events were accompanied by mitochondrial translocation of Bax and the release of cytochrome c.	Bax	64 67	1	0
31138341	2019	Isolates were identified to the species level by matrix-assisted laser desorption-ionisation time-of-flight mass spectrometry or PCR amplification and partial sequencing of tuf or rpoB.	tuf	173176	1	0
31138407	2019	Characterization of urban aerosol: Seasonal variation of genotoxicity of the water-soluble portion of PM2.5 and PM1.	PM1	112115	0	1
31138407	2019	In this study we characterize the water-soluble portion of urban aerosol from Bologna, a county town of Emilia-Romagna in the north of Italy, by collecting the finest fractions of airborne particles, PM2.5 and PM1, in three different seasons (winter, summer and autumn) over a three-year period.	PM1	210213	0	1
31138460	2019	In adenocarcinomas cases, both amyloid precursor protein and p-amyloid precursor protein were significantly associated with clinical stages (APP and p-APP), pathologic T (p-APP), and pathologic N (APP and p-APP) of the cases examined.	APP	141144	1	0
31138460	2019	In adenocarcinomas cases, both amyloid precursor protein and p-amyloid precursor protein were significantly associated with clinical stages (APP and p-APP), pathologic T (p-APP), and pathologic N (APP and p-APP) of the cases examined.	APP	197200	1	0
31138475	2019	Furthermore, anti-inflammatory activities include the reduction of pro-inflammatory cytokines and chemokines, reduction of NF-kB signaling, inhibition of pro-inflammatory enzymes, including COX1/2, 5-LOX and iNOS, reduction of C-reactive protein levels, reduction of chemotaxis and chemoluminescence of PMNs, and an inhibition of pro-inflammatory metalloproteases.	iNOS	208212	1	0
31138479	2019	While national institutes of health stroke scale scores were not significantly different on Day 1, hemorrhagic transformation patients had higher national institutes of health stroke scale scores at Day 10(OR 1.22; 95% confidence interval 1.09-1.36; P< .001), and this difference was also reflected in mRS at the end of the 3 month period.	mRS	302305	0	1
31138512	2019	Evaluation of the robustness of 3-dimensional conformal technique with MLC position control into the planning target volume in stereotactic body radiotherapy for lung cancer.	MLC	71 74	0	1
31138512	2019	The purpose of this study was to evaluate the robustness of 3-dimensional conformal technique with MLC position control into the planning target volume in stereotactic body radiotherapy for lung cancer.	MLC	99102	0	1
31138512	2019	One technique involved setting the MLC position outside the planning target volume and was referred to as Plan "O." Another technique involved setting the MLC position inside the planning target volume and was referred to as Plan "I." Two tumor motions were simulated: (1) tumor motion on the internal target volume boundary and (2) tumor motion on the planning target volume boundary.	MLC	35 38	0	1
31138512	2019	One technique involved setting the MLC position outside the planning target volume and was referred to as Plan "O." Another technique involved setting the MLC position inside the planning target volume and was referred to as Plan "I." Two tumor motions were simulated: (1) tumor motion on the internal target volume boundary and (2) tumor motion on the planning target volume boundary.	MLC	155158	0	1
31138536	2019	Analysis at embryonic timepoints showed a reduction in aortic valve cushion volume at embryonic day (E)13.5, predominantly affecting the non-coronary cusp .	cusp	150154	0	1
31138536	2019	Although total cusp volume recovered by E15.5, the non-coronary cusp remained statistically smaller.	cusp	15 19	0	1
31138536	2019	Although total cusp volume recovered by E15.5, the non-coronary cusp remained statistically smaller.	cusp	64 68	0	1
31138536	2019	As endothelial to mesenchymal transition (EMT)-derived cells contribute significantly to the non-coronary cusp, we performed proximal outflow tract cushion explant assays and found EMT deficits in Gata4G295Ski/wt embryos along with deficits in cell proliferation.	cusp	106110	0	1
31138536	2019	As endothelial to mesenchymal transition (EMT)-derived cells contribute significantly to the non-coronary cusp, we performed proximal outflow tract cushion explant assays and found EMT deficits in Gata4G295Ski/wt embryos along with deficits in cell proliferation.	EMT	181184	0	1
31138587	2019	4-1BB-expressing T cells are efficiently costimulated when incubated with PRS-343 in the presence of cancer cells expressing HER2, as evidenced by increased production of proinflammatory cytokines (IL2, GM-CSF, TNFalpha, and IFNgamma).	IL2	198201	1	0
31138604	2019	HAI was not associated with more severe disease.	HAI	0 3	0	1
31138604	2019	And the readmission rate was 0% versus 5.8% (P = .19) in patients with and without HAI, respectively.	HAI	83 86	0	1
31138615	2019	Clostridium difficile disease is mediated primarily by toxins A and B (TcdA and TcdB, respectively).	TcdA	71 75	1	0
31138615	2019	Clostridium difficile disease is mediated primarily by toxins A and B (TcdA and TcdB, respectively).	TcdB	80 84	1	0
31138615	2019	The receptor binding domains of TcdA and TcdB are immunogenic, and anti-receptor binding domains antibodies are protective.	TcdA	32 36	1	0
31138615	2019	The receptor binding domains of TcdA and TcdB are immunogenic, and anti-receptor binding domains antibodies are protective.	TcdB	41 45	1	0
31138615	2019	Plasmid-based candidates expressing either the TcdA or TcdB receptor binding domains were screened.	TcdA	47 51	1	0
31138615	2019	TcdA and TcdB vaccination alone (days 0, 2, and 4).	TcdA	0 4	1	0
31138615	2019	TcdA and TcdB vaccination alone (days 0, 2, and 4).	TcdB	9 13	1	0
31138660	2019	In addition, sexual experience induced FosB gene products expression in the infralimbic cortex (IL) in T@P, but not NoT@P, males.	FosB	39 43	1	0
31138663	2019	RB1 Deletion in Retinoblastoma Protein Pathway-Disrupted Cells Results in DNA Damage and Cancer Progression.	RB1	0 3	1	0
31138663	2019	Intriguingly, RB1 mutations can arise late in tumorigenesis in cancer cells whose retinoblastoma protein pathway is already compromised by another mutation.	RB1	14 17	1	0
31138663	2019	In this study, we present evidence for increased DNA damage and instability in cancer cells with retinoblastoma protein pathway defects when RB1 mutations are induced.	RB1	141144	1	0
31138663	2019	Cells with even one mutant copy of RB1 have increased basal levels of DNA damage and increased mitotic errors.	RB1	35 38	1	0
31138663	2019	This study offers evidence that late-arising RB1 mutations can facilitate genome instability and cancer progression that are beyond the preexisting proliferative control deficit.	RB1	45 48	1	0
31138698	2019	Our approach combines CD33-targeted CAR-T cells, or the ADC Gemtuzumab Ozogamicin with the transplantation of hematopoietic stem cells that have been engineered to ablate CD33 expression using genomic engineering methods.	ADC	56 59	0	1
31138698	2019	Whole-genome sequencing and RNA sequencing analysis revealed no detectable off-target mutagenesis and no loss of functional p53 pathways.	p53	124127	1	0
31138724	2019	The field of microbiome research is on the cusp of being able to identify clinically actionable host-microbe relationships;	cusp	43 47	0	1
31138739	2019	Division ring formation at midcell is controlled by various mechanisms in Escherichia coli, one of them being the linkage between the chromosomal Ter macrodomain and the Z-ring mediated by MatP, a DNA binding protein that organizes this macrodomain and contributes to the prevention of premature chromosome segregation.	Ter	146149	1	0
31138744	2019	These lipoproteins are essential components in each of the molecular machines that build the outer membrane, including the Bam machine that assembles beta-barrel proteins and the Lpt pathway that transports lipopolysaccharide.	Bam	123126	0	1
31138744	2019	Stress responses are known to monitor Bam and Lpt function, yet no stress system has been found that oversees the fundamental process of lipoprotein trafficking.	Bam	38 41	0	1
31138744	2019	We used genetic and chemical biology approaches to induce several different lipoprotein trafficking stresses in Escherichia coli Our results identified the Cpx two-component system as a stress response for monitoring trafficking.	Cpx	156159	1	0
31138744	2019	Cpx is activated by trafficking defects and is required to protect the cell against the consequence of the resulting stress.	Cpx	0 3	1	0
31138744	2019	The OM-targeted lipoprotein NlpE acts as a sensor that allows Cpx to gauge trafficking efficiency.	Cpx	62 65	1	0
31138744	2019	We reveal that NlpE signals to Cpx while it is transiting the inner membrane en route to the outer membrane and that only a small highly conserved N-terminal domain is required for signaling.	Cpx	31 34	1	0
31138744	2019	We propose that defective trafficking causes NlpE to accumulate in the inner membrane, activating Cpx to mount a transcriptional response that protects cells.	Cpx	98101	1	0
31138744	2019	Cpx monitors just one lipoprotein, NlpE, to detect the efficiency of lipoprotein trafficking in the cell.	Cpx	0 3	1	0
31138744	2019	NlpE and Cpx were previously shown to play a role in resistance to copper.	Cpx	9 12	1	0
31138744	2019	Copper is an important element in innate immunity against pathogens, and our findings suggest that NlpE and Cpx help E. coli survive the assault of copper on a key outer membrane assembly pathway.	Cpx	108111	1	0
31138752	2019	Strain-specific microbial factors, such as the oncoprotein CagA, as well as environmental conditions, such as iron deficiency, augment cancer risk.	CagA	59 63	1	0
31138752	2019	To investigate the combinatorial effects of these determinants in an in vivo model of gastric cancer, Mongolian gerbils were infected with the carcinogenic cag+ H. pylori strain 7.13 or a 7.13 cagA isogenic mutant, and microbial DNA extracted from gastric tissue was analyzed by 16S rRNA sequencing.	cagA	193197	1	0
31138771	2019	In this study, we first examined the expression pattern of histone demethylase KDM6B at different times of cultured human podocytes in vitro We found that the expression of KDM6B and podocyte differentiation markers WT1 and Nephrin are increased in the podocyte differentiation process.	WT1	216219	1	0
31138771	2019	In cultured podocytes, KDM6B knockdown with siRNA impaired podocyte differentiation and led to expression down-regulation of WT1 and Nephrin.	WT1	125128	1	0
31138771	2019	Overexpression of WT1 can rescue differentiated phenotype impaired by disruption of KDM6B chromatin immunoprecipitation assay further indicated that KDM6B can bind the promoter region of WT1 and reduce the histone H3K27 methylation.	WT1	18 21	1	0
31138771	2019	Overexpression of WT1 can rescue differentiated phenotype impaired by disruption of KDM6B chromatin immunoprecipitation assay further indicated that KDM6B can bind the promoter region of WT1 and reduce the histone H3K27 methylation.	WT1	187190	1	0
31138939	2019	The aim of this study was to obtain and evaluate the views of Medical and Surgical Residents of the GCPS on their training in Ghana.	GCPS	100104	0	1
31138940	2019	Others were multiple pregnancy (p < 0.000), pre - eclampsia/eclampsia (p < 0.000), anaemia (p < 0.000), malaria (p < 0.000), UTI (p < 0.012), premature rupture of membrane (p < 0.000) and antepartum haemorrhage (p < 0.000).	UTI	125128	0	1
31138955	2019	Dietary supplementation with partially hydrolyzed guar gum helps improve constipation and gut dysbiosis symptoms and behavioral irritability in children with autism spectrum disorder.	gum	55 58	0	1
31138955	2019	Prebiotic dietary water-soluble fiber obtained from partially hydrolyzed guar gum was added to diets of children with autism spectrum disorders who presented constipation symptoms.	gum	78 81	0	1
31138955	2019	Supplementation with partially hydrolyzed guar gum altered gut microbiota and significantly increased the frequency of defecation per week and altered the gut microbiota.	gum	47 50	0	1
31138955	2019	In addition, supplementation with partially hydrolyzed guar gum significantly (p<0.05) decreased and tended to decrease (p = 0.07) the concentrations of serum interleukin-1beta and tumor necrosis factor-alpha, respectively.	gum	60 63	0	1
31138955	2019	More importantly, supplementation with partially hydrolyzed guar gum significantly ameliorated behavioral irritability as per the Aberrant Behavior Checklist, Japanese Version.	gum	65 68	0	1
31138955	2019	The present study demonstrated that supplementation with partially hydrolyzed guar gum to diets of constipated autism spectrum disorders children helped improve constipation and gut dysbiosis symptoms, which in turn helped attenuate the level of serum inflammation cytokines and behavioral irritability.	gum	83 86	0	1
31138987	2019	Extracellular Vesicles Derived from Lactobacillus plantarum Increase BDNF Expression in Cultured Hippocampal Neurons and Produce Antidepressant-like Effects in Mice.	BDNF	69 73	1	0
31138987	2019	HT22 cells treated with the stress hormone glucocorticoid (GC; corticosterone) had reduced expression of Bdnf and Sirt1, whereas L-EV treatment reversed GC-induced decreased expression of Bdnf and Sirt1.	Bdnf	105109	1	0
31138987	2019	HT22 cells treated with the stress hormone glucocorticoid (GC; corticosterone) had reduced expression of Bdnf and Sirt1, whereas L-EV treatment reversed GC-induced decreased expression of Bdnf and Sirt1.	Bdnf	188192	1	0
31138987	2019	The siRNA-mediated knockdown of Sirt1 in HT22 cells decreased Bdnf4, a splicing variant of Bdnf, and Creb expression, suggesting that Sirt1 plays a role in L-EV-induced increase of BDNF and CREB expression.	Creb	101105	1	0
31138987	2019	The siRNA-mediated knockdown of Sirt1 in HT22 cells decreased Bdnf4, a splicing variant of Bdnf, and Creb expression, suggesting that Sirt1 plays a role in L-EV-induced increase of BDNF and CREB expression.	BDNF	181185	1	0
31138987	2019	The siRNA-mediated knockdown of Sirt1 in HT22 cells decreased Bdnf4, a splicing variant of Bdnf, and Creb expression, suggesting that Sirt1 plays a role in L-EV-induced increase of BDNF and CREB expression.	CREB	190194	1	0
31138987	2019	Mice exposed to restraint for 2-h daily for 14 days (CRST) exhibited depressive-like behaviors, and these CRST-treated mice had reduced expression of Bdnf and Nt4/5 in the hippocampus.	Bdnf	150154	1	0
31138987	2019	In contrast, L-EV injection prior to each restraint treatment blocked the reduced expression of Bdnf and Nt4/5, and stress-induced depressive-like behaviors.	Bdnf	96100	1	0
31138987	2019	Furthermore, L-EV treatment in CRST-treated mice also rescued the reduced expression of Bdnf, and blocked stress-induced depressive-like behaviors.	Bdnf	88 92	1	0
31138988	2019	Farnesylation-defective Rheb Increases Axonal Length Independently of mammalian-target-of-rapamycin-complex-1 Activity in Embryonic Primary Neurons.	Rheb	24 28	1	0
31138988	2019	Rheb (Ras homolog enriched in the brain) is a small GTPase protein that plays an important role in cell signaling for development of the neocortex through modulation of mammalian-target-of-rapamycin-complex-1 activity.	Rheb	0 4	1	0
31138988	2019	As such, anchoring of Rheb on the lysosomal membrane via the farnesylation of Rheb at its cysteine residue (C180) is required for its promotion of mTOR activity.	Rheb	22 26	1	0
31138988	2019	As such, anchoring of Rheb on the lysosomal membrane via the farnesylation of Rheb at its cysteine residue (C180) is required for its promotion of mTOR activity.	Rheb	78 82	1	0
31138988	2019	As such, anchoring of Rheb on the lysosomal membrane via the farnesylation of Rheb at its cysteine residue (C180) is required for its promotion of mTOR activity.	mTOR	147151	1	0
31138988	2019	To test the significance of Rheb farnesylation, we overexpressed a farnesylation mutant form of Rheb, Rheb C180S, in primary rat hippocampal neurons and also in mouse embryonic neurons using in utero electroporation.	Rheb	28 32	1	0
31138988	2019	To test the significance of Rheb farnesylation, we overexpressed a farnesylation mutant form of Rheb, Rheb C180S, in primary rat hippocampal neurons and also in mouse embryonic neurons using in utero electroporation.	Rheb	96100	1	0
31138988	2019	To test the significance of Rheb farnesylation, we overexpressed a farnesylation mutant form of Rheb, Rheb C180S, in primary rat hippocampal neurons and also in mouse embryonic neurons using in utero electroporation.	Rheb	102106	1	0
31138988	2019	Interestingly, we found that Rheb C180S maintained promotional effect of axonal elongation similar to the wild-type Rheb in both test systems.	Rheb	29 33	1	0
31138988	2019	Interestingly, we found that Rheb C180S maintained promotional effect of axonal elongation similar to the wild-type Rheb in both test systems.	Rheb	116120	1	0
31138988	2019	On the other hand, Rheb C180S failed to exhibit the multiple axon-promoting effect which is found in wild-type Rheb.	Rheb	19 23	1	0
31138988	2019	On the other hand, Rheb C180S failed to exhibit the multiple axon-promoting effect which is found in wild-type Rheb.	Rheb	111115	1	0
31138988	2019	The levels of phospho-4EBP1, a downstream target of mammalian-target-of-rapamycin-complex-1, were surprisingly increased in Rheb C180S transfected neurons, despite the levels of phosphorylated mTOR being significantly decreased compared to control vector transfectants.	Rheb	124128	1	0
31138988	2019	The levels of phospho-4EBP1, a downstream target of mammalian-target-of-rapamycin-complex-1, were surprisingly increased in Rheb C180S transfected neurons, despite the levels of phosphorylated mTOR being significantly decreased compared to control vector transfectants.	mTOR	193197	1	0
31138988	2019	A specific mammalian-target-of-rapamycin-complex-1 inhibitor, rapamycin, also could not completely abolish axon elongation characteristics of Rheb C180S in transfected cells.	Rheb	142146	1	0
31138988	2019	Our data suggests that Rheb in a non-membrane compartment can promote the axonal elongation via phosphorylation of 4EBP1 and through an mTORC1-independent pathway.	Rheb	23 27	1	0
31138991	2019	Pharmacological or genetic suppression of autophagy by stable knockdown of Atg7, LC3 or CRISPR-Cas9-mediated knockout of p62 impaired astrogenesis, while reintroduction of p62 recovered astrogenesis in p62 knockout HCN cells.	LC3	81 84	1	0
31138991	2019	Pharmacological or genetic suppression of autophagy by stable knockdown of Atg7, LC3 or CRISPR-Cas9-mediated knockout of p62 impaired astrogenesis, while reintroduction of p62 recovered astrogenesis in p62 knockout HCN cells.	p62	121124	1	0
31138991	2019	Pharmacological or genetic suppression of autophagy by stable knockdown of Atg7, LC3 or CRISPR-Cas9-mediated knockout of p62 impaired astrogenesis, while reintroduction of p62 recovered astrogenesis in p62 knockout HCN cells.	p62	172175	1	0
31138991	2019	Pharmacological or genetic suppression of autophagy by stable knockdown of Atg7, LC3 or CRISPR-Cas9-mediated knockout of p62 impaired astrogenesis, while reintroduction of p62 recovered astrogenesis in p62 knockout HCN cells.	p62	202205	1	0
31138995	2019	We found that several miRNAs were down-regulated in C22 mouse, a CMT1A mouse model.	C22	52 55	0	1
31138995	2019	In vivo efficacy of miR-381 was assessed by administration of LV-miR-381, an miR-381 expressing lentiviral vector, into the sciatic nerve of C22 mice by a single injection at postnatal day 6 (p6).	C22	141144	0	1
31138995	2019	Rotarod performance analysis revealed that locomotor coordination of LV-miR-381 administered C22 mice was significantly enhanced from 8 weeks post administration.	C22	93 96	0	1
31139013	2019	We utilized Search Tool for the Retrieval of Interacting Genes Database (STRING) to assess protein-protein interaction information, and then we used plug-in Molecular Complex Detection to screen hub modules of protein-protein interaction network in Cytoscape.	hub	195198	0	1
31139013	2019	We also performed functional analysis on the genes in the hub module by using clusterprofiler.	hub	58 61	0	1
31139013	2019	Gene set enrichment analysis and mutation analysis were also performed for hub genes.	hub	75 78	0	1
31139015	2019	Univariate Cox regression analysis and lasso Cox regression model were performed to identify and construct the prognostic gene signature.	Cox	11 14	0	1
31139015	2019	Time-dependent receiver operating characteristic, Kaplan-Meier curve, multivariate Cox regression analysis, nomogram, and decision curve analysis were used to assess the prognostic capacity of the six-gene signature.	Cox	83 86	0	1
31139015	2019	Results: A novel six-gene signature (including CSE1L, CSTB, MTHFR, DAGLA, MMP10, and GYS2) was established for hepatocellular carcinoma prognosis prediction.	CSTB	54 58	1	0
31139015	2019	Cox regression analysis showed that the six-gene signature could independently predict OS.	Cox	0 3	0	1
31139021	2019	In addition, knockdown of UTX decreased the expression of KIF14 and pAKT and increased the expression of P21.	P21	105108	1	0
31139026	2019	Thirty-three offsprings of longevous families were selected as case studies (Longevous group) and 33 ABO (blood type), age, and gender-matched subjects from non-longevous families were selected as controls (Normal group).	ABO	101104	0	1
31139042	2019	Lithium chloride alleviated the effects on neurobehavioral and promoted the differentiation and proliferation of neural progenitor cells, while a hyperandrogenic intrauterine environment had no effects on astrocytes marked by GFAP in the dentate gyrus.	GFAP	226230	1	0
31139050	2019	Phenotypically mismatched grafting resulted in altered spatiotemporal expression of neurotrophic factor BDNF, GDNF receptor GFRalpha1, cell adhesion molecules Cadm3, Cadm4, L1CAM, and proliferation associated Ki67.	GDNF	110114	1	0
31139061	2019	This expanded to include an up-regulation of mGlu5 levels across the entire CA1 region and a reduction in GABAB expression, as well as GAD67-positive interneurons particularly in the dorsal hippocampus that appeared 3 months after treatment.	CA1	76 79	0	1
31139063	2019	Activation of PV+ interneurons during place conditioning increased Fos expression in spiny projection neurons in the direct pathway and impaired lithium chloride-induced conditioned place aversion.	Fos	67 70	1	0
31139067	2019	Lesion effects were analyzed separately for left and right hemisphere damaged (LHD, RHD) patients, using voxel-based lesion-symptom mapping .	RHD	84 87	0	1
31139067	2019	Test scores of RHD and LHD patients were affected largely by damage to homologous regions, with the LHD group showing a wider distribution of "significant" voxels.	RHD	15 18	0	1
31139076	2019	However, further studies on these micrornas and advancements in miR therapeutic delivery are required for these therapeutics to advance to the clinical setting.	miR	64 67	0	1
31139088	2019	Loss-of-function studies showed that Pax6 was required for both eye development and regrowth whereas apoptosis was only required for regrowth.	Pax6	37 41	1	0
31139131	2019	Although these candidates still need to be validated in a systematic manner, we suggest the use of combinations of biomarkers that would likely reflect the "health status" of different tissues, including motor neuron health (e.g., pNFH and NF-L, cystatin C, Transthyretin), inflammation status (e.g., MCP-1, miR451), muscle health (miR-338-3p, miR-206) and metabolism (homocysteine, glutamate, chole…	NF-L	240244	1	0
31139139	2019	The COMCID (Cilostazol for prevention of Conversion from MCI to Dementia) trial, evaluating the efficacy of cilostazol for patients with mild cognitive impairment is currently ongoing in Japan.	MCI	57 60	0	1
31139145	2019	A literature search was carried out for studies that investigated the ability of ovarian reserve markers, in particular AMH and AFC, to predict poor ovarian response in in vitro fertilization cycles;	AMH	120123	1	0
31139145	2019	The most recent markers of ovarian reserve (serum AMH and ultrasound AFC) have shown to provide a direct and accurate measurement of ovarian follicle pool.	AMH	50 53	1	0
31139145	2019	Instead, being the POSEIDON classification of very recent publication, the efficacy of the POSEIDON approach in improving management and outcomes of POR patients has yet to be tested and validated with future prospective clinical trials.	POR	149152	0	1
31139145	2019	Prediction of poor response may help clinicians choose the stimulation protocol with the aim of gaining patient compliance and cost reduction, and many efforts have been made by researchers in this sense, including the formulation of the Bologna criteria and of the POSEIDON classification, in which the ovarian reserve markers (AMH and AFC) play a fundamental role.	AMH	329332	1	0
31139146	2019	An Observational Retrospective Cohort Trial on 4,828 IVF Cycles Evaluating Different Low Prognosis Patients Following the POSEIDON Criteria.	IVF	53 56	0	1
31139146	2019	Women treated with follicle-stimulating hormone plus luteinizing hormone showed worst prognostic factors, in terms of age, basal follicle-stimulating hormone, AMH, and AFC.	AMH	159162	1	0
31139146	2019	This difference was evident in suboptimal responders, whereas only AMH and AFC were different among treatment groups in low responders.	AMH	67 70	1	0
31139150	2019	Histone modifications have been linked to increased p53 expression and longer progression-free survival in pituitary tumors;	p53	52 55	1	0
31139152	2019	Antiretroviral therapy regimen containing TDF and PI was a significant determinant of the presence of vertebral deformities.	TDF	42 45	0	1
31139153	2019	P38 mitogen-activated protein kinases are players of death signals in steroidogenic cells, involving downstream p53 and caspases.	p53	112115	1	0
31139159	2019	Multilocus sequence typing differentiated the isolates into 18 STs, without new ST designated.	STs	63 66	0	1
31139159	2019	The three most common STs were ST8 (18.4%), ST5 (16.3%), and ST87 (12.2%), accounting for 46.9% of the isolates.	STs	22 25	0	1
31139159	2019	The three most common STs were ST8 (18.4%), ST5 (16.3%), and ST87 (12.2%), accounting for 46.9% of the isolates.	ST8	31 34	0	1
31139159	2019	The three most common STs were ST8 (18.4%), ST5 (16.3%), and ST87 (12.2%), accounting for 46.9% of the isolates.	ST5	44 47	0	1
31139159	2019	STs prevalent in other parts of the world were also present in China such as ST1, ST2, ST5, ST8, and ST9 which caused maternal fetal infections or outbreaks.	STs	0 3	0	1
31139159	2019	STs prevalent in other parts of the world were also present in China such as ST1, ST2, ST5, ST8, and ST9 which caused maternal fetal infections or outbreaks.	ST1	77 80	0	1
31139159	2019	STs prevalent in other parts of the world were also present in China such as ST1, ST2, ST5, ST8, and ST9 which caused maternal fetal infections or outbreaks.	ST2	82 85	0	1
31139159	2019	STs prevalent in other parts of the world were also present in China such as ST1, ST2, ST5, ST8, and ST9 which caused maternal fetal infections or outbreaks.	ST5	87 90	0	1
31139159	2019	STs prevalent in other parts of the world were also present in China such as ST1, ST2, ST5, ST8, and ST9 which caused maternal fetal infections or outbreaks.	ST8	92 95	0	1
31139159	2019	However, the STs and serogroup distribution of clinical L. monocytogenes in Beijing, China was different from those in other countries.	STs	13 16	0	1
31139159	2019	Strains of ST1 and ST2 were isolated from patients with pregnancy-associated infection, whereas none of ST155 isolates caused pregnancy-associated cases.	ST1	11 14	0	1
31139159	2019	Strains of ST1 and ST2 were isolated from patients with pregnancy-associated infection, whereas none of ST155 isolates caused pregnancy-associated cases.	ST2	19 22	0	1
31139168	2019	We observed an additive effect of cinnamon oil/ZnO NPs and synergistic interactions of other binary combinations (cinnamon oil/encapsulated curcumin and ZnO NPs/encapsulated curcumin).	NPs	51 54	0	1
31139205	2019	To identify inter-population differentiation due to genetic structure, FST was calculated for North- vs. East-African populations and Baladi and Fayoumi vs. Dandarawi for overlapping windows (500 kb with a step-size of 250 kb).	FST	71 74	0	1
31139205	2019	The runs of homozygosity and FST mapping detected several selective sweeps on different autosomes.	FST	29 32	0	1
31139205	2019	Inter-population FST among Egyptian populations reflected genetic mechanisms for the Fayoumi resistance to Newcastle Disease Virus, while FST between Egyptian and Rwanda-Uganda populations indicated the Secreted frizzled related protein 2, SFRP2, (GO:0009314) on Chromosome 4, that contributes to melanogenic activity and most likely enhances the Dandarawi chicken adaptation to high-intensity of so…	FST	17 20	0	1
31139205	2019	Inter-population FST among Egyptian populations reflected genetic mechanisms for the Fayoumi resistance to Newcastle Disease Virus, while FST between Egyptian and Rwanda-Uganda populations indicated the Secreted frizzled related protein 2, SFRP2, (GO:0009314) on Chromosome 4, that contributes to melanogenic activity and most likely enhances the Dandarawi chicken adaptation to high-intensity of so…	FST	138141	0	1
31139206	2019	Four chromosomes had the most significant SNP effects on the five production traits, a Chr14 region containing DGAT1 mostly had positive effects on fat yield and negative effects on milk and protein yields, the 88.07-89.60 Mb region of Chr06 with SLC4A4, GC, NPFFR2, and ADAMTS3 for milk and protein yields, the 30.03-36.67 Mb region of Chr20 with C6 and GHR for milk yield, and the 88.19-88.88 Mb r…	GHR	355358	1	0
31139206	2019	For somatic cell score, GC of Chr06 and PRLR of Chr20 had the most significant effects.	PRLR	40 44	1	0
31139209	2019	A critical step in the cellular stress response is transient activation of the RNA-dependent protein kinase PKR by double-helical RNA, resulting in down-regulation of protein synthesis through phosphorylation of the alpha chain of translation initiation factor eIF2, a major PKR substrate.	PKR	108111	1	0
31139209	2019	A critical step in the cellular stress response is transient activation of the RNA-dependent protein kinase PKR by double-helical RNA, resulting in down-regulation of protein synthesis through phosphorylation of the alpha chain of translation initiation factor eIF2, a major PKR substrate.	PKR	275278	1	0
31139209	2019	However, intragenic elements of 100-200 nucleotides in length within primary transcripts of cellular genes, exemplified by the tumor necrosis factor -alpha gene and fetal and adult globin genes, are capable of forming RNA structures that potently activate PKR and thereby strongly enhance mRNA splicing efficiency.	PKR	256259	1	0
31139209	2019	By inducing nuclear eIF2alpha phosphorylation, these PKR activator elements enable highly efficient early spliceosome assembly yet do not impair translation of the mature spliced mRNA.	PKR	53 56	1	0
31139209	2019	The TNF-alpha RNA activator of PKR folds into a compact pseudoknot that is highly conserved within the phylogeny.	PKR	31 34	1	0
31139209	2019	Upon excision of beta-globin first intron, the RNA activator of PKR, located in exon 1, is silenced through strand displacement by a short sequence within exon 2, restricting thereby the ability to activate PKR to the splicing process without impeding subsequent synthesis of beta-globin essential for survival.	PKR	64 67	1	0
31139209	2019	Upon excision of beta-globin first intron, the RNA activator of PKR, located in exon 1, is silenced through strand displacement by a short sequence within exon 2, restricting thereby the ability to activate PKR to the splicing process without impeding subsequent synthesis of beta-globin essential for survival.	PKR	207210	1	0
31139209	2019	This activator/silencer mechanism likewise controls splicing of alpha-globin pre-mRNA, but the exonic locations of PKR activator and silencer sequences are reversed, demonstrating evolutionary flexibility.	PKR	115118	1	0
31139209	2019	Impaired splicing efficiency may underlie numerous human beta-thalassemia mutations that map to the beta-globin RNA activator of PKR or its silencer.	PKR	129132	1	0
31139209	2019	Even where such mutations change the encoded amino acid sequence during subsequent translation, they carry the potential of first impairing PKR-dependent mRNA splicing or shutoff of PKR activation needed for optimal translation.	PKR	182185	1	0
31139219	2019	All patients were diagnosed with squamous cell carcinoma, most of the tumors were pT1.	pT1	82 85	0	1
31139219	2019	Moreover, there were no complications involving lip mucosa.	lip	48 51	0	1
31139224	2019	Material and methods: Patients with peripheral hepatic malignancies, in whom the critical proximity of an OAR to the clinical target volume in the assessment by contrast-enhanced magnetic resonance imaging scans and the preplanning process were included.	OAR	106109	0	1
31139224	2019	Additionally, patients underwent placement of an interventional balloon catheter during computed tomography -guided application of interstitial brachytherapy catheters inserted into the tissue between hepatic capsule and adjacent OAR.	OAR	230233	0	1
31139224	2019	The virtual position of an OAR without balloon catheter was anticipated and contoured in addition to contouring of clinical target volume and OAR.	OAR	27 30	0	1
31139224	2019	The virtual position of an OAR without balloon catheter was anticipated and contoured in addition to contouring of clinical target volume and OAR.	OAR	142145	0	1
31139224	2019	The calculated dose values for clinical target volume as well as 1 cc of the relevant OAR (D1cc) with and without balloon were recorded.	OAR	86 89	0	1
31139224	2019	The mean D1cc of the OAR in the group with balloon(s) was 12.6 Gy compared with 16 Gy in the virtual cohort without the device, therefore significantly lower (p < 0.001).	OAR	21 24	0	1
31139229	2019	Four different plans were generated for each patient, with dose prescriptions of 5.5 Gy 5 fractions (plan A), 6.5 Gy 4 fractions (plan B), 7 Gy 4 fractions (plan C), and 9 Gy 2 fractions (plan D), delivered to clinical target volume.	Gy 2	172176	0	1
31139229	2019	Conclusions: EQD2 of bladder, rectum, sigmoid, D90 clinical target volume, and point A were similar with 5.5 Gy 5 fractions, 6.5 Gy 4 fractions, and 7 Gy 4 fractions, whereas EQD2 of 9 Gy 2 fractions was significantly unfavorable compared to other schedules.	Gy 2	185189	0	1
31139232	2019	This study aimed to assess the reliability of a pro- and anti-inflammatory cytokine panel in a sample of healthy people measured with a novel electrochemiluminescent multiplex immunoassay platform (Meso Scale Discovery, MSD), and to characterize their associations with metabolic and inflammatory phenotypes.	MSD	220223	0	1
31139232	2019	Conclusions: Single measurements of selected cytokines using MSD platform, including IL-6, IL-8, IL-10, IL-13, TNF-alpha, and IFN-gamma have shown to be representative of an individual's average level over time and could be suitable for use in prospective epidemiological and clinical studies.	MSD	61 64	0	1
31139246	2019	Increasing evidences suggest that the bioactive components of Danshen can improve cognitive deficits in mice, protect neuronal cells, reduce tau hyperphosylation, prevent amyloid-beta fiber formation and disaggregation.	tau	141144	1	0
31139287	2019	Significant post-radio-frequency ablation reduction in magnesium, calcium and creatinine, associated hyperchloremic metabolic acidosis and a modest QTc prolongation were also observed with use of both ACs albeit only moderate to weakly correlated with saline volume infused through the ablation catheters.	Acs	201204	0	1
31139291	2019	Despite competing mortality risks in this elderly cohort, updated vital status data from PROTECT AF and PREVAIL revealed that left atrial appendage closure was associated with 30% improved survival compared with warfarin, with an NNT of 16.	NNT	230233	0	1
31139324	2019	Thymoglobulin, a polyclonal antibody that has been used as an immunosuppressive agent in kidney transplantation over the last decades, was a significant risk factor for developing cancer in adjusted regression analysis [IRR = 1.62, 1.02-2.57;	IRR	220223	0	1
31139332	2019	The top upstream transcription regulators affected were IL1B, EGR1, FAS, and TGFB1.	FAS	68 71	1	0
31139345	2019	Balb/c mice were immunized to investigate IgE epitope induction of IgE production.	IgE	42 45	1	0
31139345	2019	Balb/c mice were immunized to investigate IgE epitope induction of IgE production.	IgE	67 70	1	0
31139345	2019	House dust mite allergic sera bound rDer p 24 in vitro and 5/10 house dust mite allergic patients (50%) had positive SPT reactions to rDer p 24.	SPT	117120	0	1
31139345	2019	Conclusions: We identified Der p 24 as a major house dust mite allergen with strong IgE binding activity via an immunodominant IgE epitope in the N-terminal 32-residue region, which triggers IgE production in vivo.	IgE	191194	1	0
31139381	2019	The results of this study showed that 27-hydroxycholesterol treatment increased secretion of tumor necrosis factor alpha and inducible nitric oxide synthase and decreased secretion of interleukin-10, upregulated expression of transforming growth factor-beta, NF-kappaB p65 and p50, and downregulated expression of cyclooxygenase-2 in SH-SY5Y cells.	p50	277280	1	0
31139420	2019	Before and after training, participants will undergo a clinical evaluation, assessing motor recovery of the affected arm (Fugl-Meyer Stroke Assessment-FMA) and a transcranial magnetic stimulation evaluation to assess the integrity of the corticospinal tract, as reflected in MEP amplitude.	MEP	275278	0	1
31139429	2019	Samples from all the participants were assessed for anti-tissue transglutaminase antibody and total serum IgA by ELISA.	IgA	106109	1	0
31139429	2019	Positive tissue transglutaminase antibody and randomly selected low IgA values were reconfirmed using anti-tTG-IgG and gliadin IgG ELISA.	IgA	68 71	1	0
31139429	2019	Randomly selected low IgA values were found negative in tTG-IgG and gliadin IgG for all the participants.	IgA	22 25	1	0
31139441	2019	The ICER was US$9821 per death averted (2015 USD) and US$347 per disability-adjusted life years averted for RUSF compared with no moderate acute malnutrition treatment.	ICER	4 8	0	1
31139456	2019	Median MPR of lowest-priced generic versions was 0.71 in retail pharmacies.	MPR	7 10	0	1
31139468	2019	Patients were divided into early discharge (ED, discharge in three days or less postoperatively) and late discharge (LD, discharge in more than three days postoperatively) groups based on clinical progression and PHS after laparoscopic cholecystectomy.	PHS	213216	0	1
31139468	2019	Multivariate analysis revealed that tokyo guidelines severity grade II, age >65 years, and elevated total bilirubin and alkaline phosphatase levels are independent factors for long PHS.	PHS	181184	0	1
31139480	2019	One of the subtypes of influenza A, the H1N1 strain, also known as swine flu, is especially of high risk for development of complications in pregnant women.	flu	73 76	0	1
31139484	2019	A Shot That Hits the Tumor: Incidental Finding of Early Colon Cancer in a Gunshot Wound Specimen-The Role of Pathologic Examination.	Hits	12 16	0	1
31139486	2019	Use of ECT in Major Vascular Neurocognitive Disorder with Treatment-Resistant Behavioral Disturbance following an Acute Stroke in a Young Patient.	ECT	7 10	0	1
31139486	2019	The following case describes the utilization of bitemporal ECT as a treatment of last resort in a 47-year-old woman with profoundly treatment-resistant behavioral disturbance poststroke.	ECT	59 62	0	1
31139486	2019	The use of ECT led to improvement in symptoms sufficient for discharge from an inpatient psychiatric unit to the nursing home.	ECT	11 14	0	1
31139486	2019	ECT is generally safe, is well tolerated, and may be effective in improving symptoms in treatment-resistant behavioral disturbance secondary to stroke with major neurocognitive impairment, as suggested in this case.	ECT	0 3	0	1
31139517	2019	BACKGROUND: Anger is defined as an emotional state that involves displeasure and consists of subjective feelings that vary in intensity, from mild irritation or annoyance to intense fury and rage.	rage	191195	0	1
31139561	2019	Depending on the assay used, the results of several studies showed that circulating tumor dna was able to identify relevant mutations or fusions including RAS, HER2/Neu, BRAF, MET, BRCA2, APC, TP53, ALK, ROS1, PTEN, and NF1.	BRAF	170174	1	0
31139561	2019	Depending on the assay used, the results of several studies showed that circulating tumor dna was able to identify relevant mutations or fusions including RAS, HER2/Neu, BRAF, MET, BRCA2, APC, TP53, ALK, ROS1, PTEN, and NF1.	APC	188191	1	0
31139561	2019	Depending on the assay used, the results of several studies showed that circulating tumor dna was able to identify relevant mutations or fusions including RAS, HER2/Neu, BRAF, MET, BRCA2, APC, TP53, ALK, ROS1, PTEN, and NF1.	ALK	199202	1	0
31139561	2019	Depending on the assay used, the results of several studies showed that circulating tumor dna was able to identify relevant mutations or fusions including RAS, HER2/Neu, BRAF, MET, BRCA2, APC, TP53, ALK, ROS1, PTEN, and NF1.	PTEN	210214	1	0
31139561	2019	Depending on the assay used, the results of several studies showed that circulating tumor dna was able to identify relevant mutations or fusions including RAS, HER2/Neu, BRAF, MET, BRCA2, APC, TP53, ALK, ROS1, PTEN, and NF1.	NF1	220223	1	0
31139593	2019	Objective: This study investigated the attitude of Korean physicians toward women's access to emergency contraceptive pills and the reclassification of ECP to a behind-the-counter drug.	ECP	152155	0	1
31139593	2019	Methods: This study involved 946 physicians who had prescribed ECP in South Korea.	ECP	63 66	0	1
31139593	2019	Results: Regarding the barriers limiting women's access to ECP, 24.8% of physicians responded that women lacked information about ECP and 22.5% felt that women were likely to be emotionally burdened by visits to clinics or hospitals to obtain ECP prescriptions.	ECP	59 62	0	1
31139593	2019	Results: Regarding the barriers limiting women's access to ECP, 24.8% of physicians responded that women lacked information about ECP and 22.5% felt that women were likely to be emotionally burdened by visits to clinics or hospitals to obtain ECP prescriptions.	ECP	130133	0	1
31139593	2019	Results: Regarding the barriers limiting women's access to ECP, 24.8% of physicians responded that women lacked information about ECP and 22.5% felt that women were likely to be emotionally burdened by visits to clinics or hospitals to obtain ECP prescriptions.	ECP	243246	0	1
31139593	2019	Ninety-two percent of physicians responded that ECP should remain a prescription drug while 6.1% stated preferences for a switch to a behind-the-counter drug.	ECP	48 51	0	1
31139593	2019	Physicians who opposed the switch were concerned about the potential abuse of ECP.	ECP	78 81	0	1
31139593	2019	In order to prevent ECP abuse, the most important factor to be considered was education on contraception.	ECP	20 23	0	1
31139593	2019	Conclusion: A majority of Korean physicians opposed the reclassification of ECP to a behind-the-counter drug owing to their belief in increasing the role of educational initiatives about contraception and contraceptive practices before improving the access to ECP.	ECP	76 79	0	1
31139593	2019	Conclusion: A majority of Korean physicians opposed the reclassification of ECP to a behind-the-counter drug owing to their belief in increasing the role of educational initiatives about contraception and contraceptive practices before improving the access to ECP.	ECP	260263	0	1
31139593	2019	Furthermore, we believe that efforts are needed to ensure accuracy of information on contraception to facilitate women's access to ECP.	ECP	131134	0	1
31139603	2019	The birth cohort was divided into 3 subgroups according to CKD Stages at the current age: CKD 1-2 (Group 1) (eGFR 60 ml/min/1.73 m2) (N = 15), CKD stage 3-5 (Group 2) (eGFR 59 ml/min/1.73 m2) (N = 12), and ESRD-Dialysis and/or Transplantation (Group 3) (N = 15).	eGFR	109113	0	1
31139603	2019	The birth cohort was divided into 3 subgroups according to CKD Stages at the current age: CKD 1-2 (Group 1) (eGFR 60 ml/min/1.73 m2) (N = 15), CKD stage 3-5 (Group 2) (eGFR 59 ml/min/1.73 m2) (N = 12), and ESRD-Dialysis and/or Transplantation (Group 3) (N = 15).	eGFR	168172	0	1
31139638	2019	The aim of the present study is to evaluate the antioxidant effect of NAC on amyloid pathology and cognition and also to investigate the link between amyloid pathology and glial cells activation.	NAC	70 73	0	1
31139638	2019	Intracerebroventricular colchicine in rats known mimics human AD in many aspects including memory loss, oxidative stress, and hyper phosphorylation of tau protein.	tau	151154	1	0
31139638	2019	The animal groups consisted of age matched control, sham operated, AD, and NAC treated in AD models of rats.	NAC	75 78	0	1
31139638	2019	The antioxidant NAC has reversed the cognitive deficits and inhibited microglia activation but failed to inhibit BAP expression and astrocytosis.	NAC	16 19	0	1
31139638	2019	The antioxidant NAC has reversed the cognitive deficits and inhibited microglia activation but failed to inhibit BAP expression and astrocytosis.	BAP	113116	1	0
31139638	2019	Intraneuronal BAP accumulation is deleterious and known to adversely affect cognition, but in this study in spite of intraneuronal BAP accumulation, the cognition is restored.	BAP	14 17	1	0
31139638	2019	Intraneuronal BAP accumulation is deleterious and known to adversely affect cognition, but in this study in spite of intraneuronal BAP accumulation, the cognition is restored.	BAP	131134	1	0
31139638	2019	It can be postulated that NAC might have reversed the effect of intraneuronal beta amyloid protein by acting on some downstream compensatory mechanisms which needs to be explored.	NAC	26 29	0	1
31139644	2019	Methods: Seventy C57BL/6 mice (half males and half females) were randomly divided into 7 groups, 10 in each group: control group (CON group), UC model group (UC group), and sulfasalazine-positive control group (SASP group), chlorogenic acid low dose group (CGA-L group), chlorogenic acid medium dose group (CGA-M group), chlorogenic acid high dose group (CGA-H group), and ERK inhibitor + chlorogeni…	CON	130133	0	1
31139644	2019	Methods: Seventy C57BL/6 mice (half males and half females) were randomly divided into 7 groups, 10 in each group: control group (CON group), UC model group (UC group), and sulfasalazine-positive control group (SASP group), chlorogenic acid low dose group (CGA-L group), chlorogenic acid medium dose group (CGA-M group), chlorogenic acid high dose group (CGA-H group), and ERK inhibitor + chlorogeni…	SASP	211215	0	1
31139644	2019	Results: The UC models were established successfully by drinking DSS water.	DSS	65 68	0	1
31139644	2019	Chlorogenic acid reduces DSS-induced colonic mucosal damage, inhibits DSS-induced inflammation, oxidative stress, and apoptosis in colon, and reduces ERK1/2, p -ERK, p38, p-p38, JNK, and p-JNK protein expression.	p38	166169	1	0
31139644	2019	Chlorogenic acid reduces DSS-induced colonic mucosal damage, inhibits DSS-induced inflammation, oxidative stress, and apoptosis in colon, and reduces ERK1/2, p -ERK, p38, p-p38, JNK, and p-JNK protein expression.	JNK	178181	1	0
31139648	2019	The results showed that electrical stimulation increased intracellular Ca2+ concentration, promoted the expression of PCNA, CyclinB1, and CyclinD1, and increased the proportion of cells in S and G2 phages.	PCNA	118122	1	0
31139651	2019	Considering all the stress conditions or high light stress alone, the results showed that the combination of prs and secA was the best choice for the double reference gene calibration method by qPCR.	prs	109112	1	0
31139651	2019	Considering all the stress conditions or high light stress alone, the results showed that the combination of prs and secA was the best choice for the double reference gene calibration method by qPCR.	secA	117121	1	0
31139651	2019	The combination of secA and ppc, rimM and rnpA, rnpA, and ilvD was most stable under no treatment, NaCl-stress conditions, and H2O2-stress conditions, respectively.	secA	19 23	1	0
31139651	2019	The combination of secA and ppc, rimM and rnpA, rnpA, and ilvD was most stable under no treatment, NaCl-stress conditions, and H2O2-stress conditions, respectively.	rimM	33 37	1	0
31139651	2019	The combination of secA and ppc, rimM and rnpA, rnpA, and ilvD was most stable under no treatment, NaCl-stress conditions, and H2O2-stress conditions, respectively.	rnpA	42 46	1	0
31139651	2019	The combination of secA and ppc, rimM and rnpA, rnpA, and ilvD was most stable under no treatment, NaCl-stress conditions, and H2O2-stress conditions, respectively.	rnpA	48 52	1	0
31139651	2019	The combination of secA and ppc, rimM and rnpA, rnpA, and ilvD was most stable under no treatment, NaCl-stress conditions, and H2O2-stress conditions, respectively.	ilvD	58 62	1	0
31139651	2019	RimM was stable under only special conditions and should be carefully chosen.	RimM	0 4	1	0
31139651	2019	To validate the above results, a cyanobacterial core clock gene, kaiC, was used to evaluate the actual performance of the optimized reference genes by qPCR, as well as the worst reference genes under different stress conditions.	kaiC	65 69	1	0
31139657	2019	The mouse model suggested gossypol injection ameliorated osteoporosis, while coinjection of AAV5-WIF1 eliminated the protection effects of gossypol, as evidenced by H&E staining, serum osteocalcin level, serum OPG level, serum RANKL level, bone density, ultimate strength, and postyield displacement.	OPG	210213	1	0
31139659	2019	The Diversity of Human Dirofilariasis in Western Sri Lanka.	Sri	49 52	0	1
31139659	2019	The aim of this retrospective study was to describe and update the demography and clinical spectrum of human dirofilariasis in western Sri Lanka.	Sri	135138	0	1
31139659	2019	Nematode or nematode fragments isolated from excision biopsies that were confirmed as D. repens at the Department of Parasitology, Faculty of Medicine, University of Kelaniya, Sri Lanka, between 2012 and 2018 were included.	Sri	176179	0	1
31139660	2019	The presence of a methyl group in the para position of the aromatic ring is suggested which enhances the activity of the compound against fungi.	para	38 42	0	1
31139663	2019	Overall, parasite densities that ranged above 3,200 parasites per mul of blood could be used to define the malaria attributable fever cases.	mul	66 69	0	1
31139663	2019	In groups of children aged between 24 and 59 months and 60 and 94 months, the optimum cut-off parasite density was 6,400 parasites per mul of blood, while children aged between 95 and 120 months had a cut-off of 800 parasites per mul of blood.	mul	135138	0	1
31139663	2019	In groups of children aged between 24 and 59 months and 60 and 94 months, the optimum cut-off parasite density was 6,400 parasites per mul of blood, while children aged between 95 and 120 months had a cut-off of 800 parasites per mul of blood.	mul	230233	0	1
31139667	2019	Results: Of the 40 participants, 26 (65%) were high responders and 14 (35%) low responders at baseline, which did not change over time or by cytomegalovirus levels (median at first/second time points, 383/308 SFUs/106 cells for high responders vs 21/41 SFUs/106 for LRs).	LRs	266269	0	1
31139669	2019	Methods: Serum from a random sample of 600 adults in the Hepatitis B Research Network Cohort Study was tested for hepatitis e virus RNA and anti-hepatitis e virus IgM and IgG.	IgM	163166	1	0
31139669	2019	Results: Anti-hepatitis e virus IgG and IgM seroprevalence was 28.5% and 1.7%, respectively.	IgM	40 43	1	0
31139681	2019	Percentage improvement in PEFR was strongly correlated with proximity of the stimulated electrode contact to the mesencephalic locomotor region in the rostral PPN (r = 0.814, n = 9, P = 0.008).	PPN	159162	0	1
31139684	2019	Results: In the discovery cohort, MCI, MCI-AD, alzheimer disease dementia, DLB-PDD, VaD, and frontotemporal dementia patients all showed increased CSF levels of placental growth factor compared with controls (sMCI P = 0.019; MCI-alzheimer disease P = 0.005; alzheimer disease dementia, DLB-PDD, VaD, and frontotemporal dementia all P < 0.001).	MCI	34 37	0	1
31139684	2019	A combination of placental growth factor, tau, and Abeta42 (tau/Abeta42/PlGF) was more accurate than tau/Abeta42 when differentiating frontotemporal dementia from a group of other dementias (AUC 0.972 vs. 0.932, P < 0.01).	tau	42 45	1	0
31139684	2019	Interpretation: CSF placental growth factor is increased in frontotemporal dementia compared with other dementia disorders, MCI, and healthy controls and might be useful as a diagnostic biomarker of frontotemporal dementia.	MCI	124127	0	1
31139687	2019	Objective: Exercise may be physically and psychologically important for people with ALS, especially in the earlier stages of the disease, and, as a consequence, current ALS clinical management includes individualized rehabilitation as part of multidisciplinary care because.	ALS	84 87	0	1
31139687	2019	Objective: Exercise may be physically and psychologically important for people with ALS, especially in the earlier stages of the disease, and, as a consequence, current ALS clinical management includes individualized rehabilitation as part of multidisciplinary care because.	ALS	169172	0	1
31139687	2019	However, while recent studies focused on which type of exercise is more indicated to ALS patients, there is no evidence at which frequency training sessions should be performed.	ALS	85 88	0	1
31139687	2019	Methods: We performed an assessor blinded randomized clinical trial to investigate the superiority of two different frequencies of exercise on rate of progression in ALS.	ALS	166169	0	1
31139687	2019	Conclusions: Despite some limitations, our trial demonstrated that high-frequency physical exercise was not superior to UER on ALSFRS-R scores, motor and respiratory functions, survival, fatigue, and quality of life of ALS patients.	ALS	219222	0	1
31139695	2019	Biallelic mutations in PIGP cause developmental and epileptic encephalopathy.	PIGP	23 27	1	0
31139695	2019	One of the genes involved, PIGP, has recently been associated with infantile seizures and developmental delay in two siblings.	PIGP	27 31	1	0
31139695	2019	Here, we report the second family with a markedly overlapping phenotype due to a homozygous frameshift mutation (c.456delA;p.Glu153Asnfs*34) in PIGP.	PIGP	144148	1	0
31139695	2019	Our findings corroborate PIGP as a monogenic disease gene for developmental and epileptic encephalopathy.	PIGP	25 29	1	0
31139698	2019	Over 95% of SHH-MBs contain at least one driver event - the activating mutations frequently affect sonic hedgehog signaling (PTCH1, SMO, SUFU), genome maintenance (TP53), and chromatin modulation (KMT2D, KMT2C, HAT complexes), while genes responsible for transcriptional regulation (MYCN) are recurrently amplified.	SMO	132135	1	0
31139698	2019	Over 95% of SHH-MBs contain at least one driver event - the activating mutations frequently affect sonic hedgehog signaling (PTCH1, SMO, SUFU), genome maintenance (TP53), and chromatin modulation (KMT2D, KMT2C, HAT complexes), while genes responsible for transcriptional regulation (MYCN) are recurrently amplified.	SUFU	137141	1	0
31139698	2019	Over 95% of SHH-MBs contain at least one driver event - the activating mutations frequently affect sonic hedgehog signaling (PTCH1, SMO, SUFU), genome maintenance (TP53), and chromatin modulation (KMT2D, KMT2C, HAT complexes), while genes responsible for transcriptional regulation (MYCN) are recurrently amplified.	HAT	211214	1	0
31139698	2019	SHH-MBs have the highest prevalence of damaging germline mutations among all MBs.	MBs	77 80	0	1
31139698	2019	TP53-mutant MBs are enriched among older children and have the worst prognosis among all SHH-MBs.	MBs	12 15	0	1
31139698	2019	Numerous genetic aberrations, including mutations of TERT, DDX3X, and the PI3K/AKT/mTOR pathway are almost exclusive to adult patients.	TERT	53 57	1	0
31139698	2019	We discuss discoveries based on preclinical models and elaborate on the applicability of potential new therapies, including BET bromodomain inhibitors, statins, inhibitors of SMO, AURK, PLK, cMET, targeting stem-like cells, and emerging immunotherapeutic strategies.	BET	124127	1	0
31139698	2019	We discuss discoveries based on preclinical models and elaborate on the applicability of potential new therapies, including BET bromodomain inhibitors, statins, inhibitors of SMO, AURK, PLK, cMET, targeting stem-like cells, and emerging immunotherapeutic strategies.	SMO	175178	1	0
31139698	2019	We discuss discoveries based on preclinical models and elaborate on the applicability of potential new therapies, including BET bromodomain inhibitors, statins, inhibitors of SMO, AURK, PLK, cMET, targeting stem-like cells, and emerging immunotherapeutic strategies.	PLK	186189	1	0
31139722	2019	Here, we developed chemoproteomic tools to profile changes in gut microbiome-associated BSH activity.	BSH	88 91	1	0
31139722	2019	Using these tools, we identified altered BSH activities in a murine model of inflammatory bowel disease, in this case, colitis induced by dextran sodium sulfate, leading to changes in bile acid metabolism that could impact host metabolism and immunity.	BSH	41 44	1	0
31139722	2019	Importantly, our findings reveal that alterations in BSH enzymatic activities within the gut microbiome do not correlate with changes in gene abundance as determined by metagenomic sequencing, highlighting the utility of chemoproteomic approaches for interrogating the metabolic activities of the gut microbiota.	BSH	53 56	1	0
31139758	2019	Methods: In this randomized, double-blind study, participants receiving suppressive antiretroviral therapy with chronic diarrhea received placebo or SBI at 2.5 g BID or 5 g BID for 4 weeks, followed by a 20-week placebo-free extension phase with SBI at either 2.5 or 5 g BID.	BID	162165	0	1
31139758	2019	Methods: In this randomized, double-blind study, participants receiving suppressive antiretroviral therapy with chronic diarrhea received placebo or SBI at 2.5 g BID or 5 g BID for 4 weeks, followed by a 20-week placebo-free extension phase with SBI at either 2.5 or 5 g BID.	BID	173176	0	1
31139758	2019	Methods: In this randomized, double-blind study, participants receiving suppressive antiretroviral therapy with chronic diarrhea received placebo or SBI at 2.5 g BID or 5 g BID for 4 weeks, followed by a 20-week placebo-free extension phase with SBI at either 2.5 or 5 g BID.	BID	271274	0	1
31139800	2019	Furthermore, 246 N-glycosylated peptides corresponding to 104 N-glycosylated proteins were identified from only 1 muL human serum, revealing the great potential of this affinity nanofiber for glycopeptide enrichment and glycoproteomics research.	muL	114117	0	1
31139836	2019	Furthermore, the autophagy regulator LC3 and TJ protein claudin-2 were both upregulated in acute necrotizing pancreatitis according to dual immunofluorescence analysis.	LC3	37 40	1	0
31139846	2019	No imprinted XIST expression in pigs: biallelic XIST expression in early embryos and random X inactivation in placentas.	XIST	13 17	1	0
31139846	2019	No imprinted XIST expression in pigs: biallelic XIST expression in early embryos and random X inactivation in placentas.	XIST	48 52	1	0
31139846	2019	Here, we sequenced the porcine XIST gene and identified an insertion/deletion mutation between Asian- and Western-origin pig breeds.	XIST	31 35	1	0
31139846	2019	Allele-specific analysis revealed biallelic XIST expression in porcine ICSI blastocysts.	XIST	44 48	1	0
31139846	2019	The hypomethylation status of an important XIST differentially methylated region in gametes and early embryos demonstrated that no methylation is pre-deposited on XIST in pigs.	XIST	163167	1	0
31139848	2019	The mental health effects of visa insecurity for refugees and people seeking asylum: a latent class analysis.	visa	29 33	0	1
31139848	2019	OBJECTIVES: Current regional conflicts are creating a surge in forced migration, and heightened visa restrictions are increasingly being applied.	visa	96100	0	1
31139848	2019	The current study aimed to examine the relationship between visa insecurity and psychological outcomes within a large clinical sample of refugees and people seeking asylum in Australia.	visa	60 64	0	1
31139848	2019	People with insecure visa status were at least five times more likely to report high (OR = 5.86, p < 0.001) or very high (OR = 5.27, p < 0.01) depression and anxiety symptoms than those with permanent residency.	visa	21 25	0	1
31139849	2019	METHODS: Using Growing Up in Scotland birth cohort data (N = 2816), an inverse probability-weighted regression-based mediation technique was applied to assess associations between low-income status (< 11,000 in 2004/5), resource access, and cumulative 8-year adverse childhood experiences incidence ( 1, 3 ACEs).	ACEs	306310	0	1
31139849	2019	If all had access to transportation, 21% (95% CI 3%, 41%) of the income-based inequality in incidence of 3 or more ACEs could be eliminated.	ACEs	115119	0	1
31139877	2019	P = 0.001) and with concurrent use of CYP inducers (- 36%; CI, - 44%, - 28%; p < 0.001), but higher using CYP3A4 inhibitors as co-medications (+ 36%; CI, + 10%, + 68%; p = 0.005).	CYP	38 41	1	0
31139918	2019	SUBJECTS/METHODS: Prospective, non-randomized, observational study was conducted on 8 eyes of 7 patients with large, chronic and recurrent MHs, which were treated by pars plana vitrectomy with IILMFT.	MHs	139142	0	1
31139944	2019	An experimental test of the allotonic frequency hypothesis to isolate the effects of light pollution on bat prey selection.	bat	104107	0	1
31139944	2019	The hypothesis has been tested to date almost exclusively in areas with permanent lighting, where the effects of lights on bat diets are confounded with other aspects of human habitat alteration.	bat	123126	0	1
31139944	2019	We found that syntonic bats increased their consumption of moth prey under experimentally lit conditions, likely owing to a reduction in the ability of eared moths to evade the bats.	lit	90 93	0	1
31139984	2019	Total number of procedures did not differ significantly between the two groups (endoscopic retrograde cholangiopancreatography median = 2 vs. PTC median = 2.5, p = 0.83).	PTC	142145	0	1
31139984	2019	Number of hospitalizations since initial intervention did not differ significantly between the two groups (endoscopic retrograde cholangiopancreatography median = 1 vs. PTC median = 3.5, p = 0.052).	PTC	169172	0	1
31140012	2019	This study examined ASD awareness and knowledge among 488 University of Zambia undergraduate students using an autism awareness and knowledge survey.	ASD	20 23	0	1
31140012	2019	Study findings on awareness revealed a high proportion of students-seventy-nine percent (79%) had never heard of ASD before the survey.	ASD	113116	0	1
31140012	2019	Significant variation in aspects of ASD knowledge was explained by gender, having children, internet use and school of study.	ASD	36 39	0	1
31140012	2019	Implications of low levels of ASD awareness and knowledge is a call to invest in ASD awareness campaigns through different platforms in order to promote ASD knowledge that translates into increased ASD understanding for better service provision in Zambia.	ASD	30 33	0	1
31140012	2019	Implications of low levels of ASD awareness and knowledge is a call to invest in ASD awareness campaigns through different platforms in order to promote ASD knowledge that translates into increased ASD understanding for better service provision in Zambia.	ASD	81 84	0	1
31140012	2019	Implications of low levels of ASD awareness and knowledge is a call to invest in ASD awareness campaigns through different platforms in order to promote ASD knowledge that translates into increased ASD understanding for better service provision in Zambia.	ASD	153156	0	1
31140012	2019	Implications of low levels of ASD awareness and knowledge is a call to invest in ASD awareness campaigns through different platforms in order to promote ASD knowledge that translates into increased ASD understanding for better service provision in Zambia.	ASD	198201	0	1
31140018	2019	Resveratrol, when applied immediately after MCAO onset for 3 days, promoted Th1/Th2 balance towards Th2 polarization and skewed Treg/Th17 balance towards Treg in the small intestinal lamina propria, and decreased small intestinal pro-inflammatory cytokines expression through modulating intestinal flora at 3 days post-ischemia (dpi).	Th2	100103	0	1
31140038	2019	Mind the Gaps: Ontogeny of Human Brain P-gp and Its Impact on Drug Toxicity.	P-gp	39 43	1	0
31140040	2019	Forty different outcome measures for assessing health-related quality of life domains were reported, and 30% of outcome measures were used by more than one HCP.	HCP	156159	0	1
31140071	2019	In the six years of vancomycin-resistant enterococci proficiency testing to date, the detection of vanA-positive strains was excellent and an increased sensitivity in vanB detection as well as an increase in specificity was observed.	vanB	167171	1	0
31140091	2019	The synaptic ultrastructure and the expressions of phosphorylated calcium/calmodulin-dependent protein kinase II and N-methyl-D-aspartate receptor 1 (NMDAR1 or NR1) in the hippocampus were tested by transmission electron microscopy and Western blot, respectively.	NR1	160163	1	0
31140091	2019	Results showed that there was no significant difference in the synaptic ultrastructure and the expressions of protein kinase ii and NR1 in the hippocampus of young rats between the experimental group and control group.	NR1	132135	1	0
31140097	2019	Using a phylogenetic analysis based on the VP1 gene sequence, the Brazilian canine kobuvirus field strains were found to be very similar to a previously identified canine kobuvirus strain from Brazil that was found in the tissue of a puppy and were also found to be clustered with other canine kobuvirus strains detected worldwide and other kobuvirus strains identified in mouse, feline, and human h…	VP1	43 46	1	0
31140103	2019	LIN28A-stabilized FBXL19-AS1 promotes breast cancer migration, invasion and EMT by regulating WDR66.	EMT	76 79	0	1
31140103	2019	RIP assay was used to examine interaction between LIN28A and FBXL19-AS1.	RIP	0 3	0	1
31140103	2019	Loss-of-function assays indicated that FBXL19-AS1 promoted cell migration, invasion, and EMT in breast cancer.	EMT	89 92	0	1
31140103	2019	Finally, rescue assays suggested that FBXL19-AS1 promoted migration, invasion, and EMT through regulating WDR66 in breast cancer.	EMT	83 86	0	1
31140114	2019	GOV IDENTIFIER: NCT03126695.	GOV	0 3	0	1
31140138	2019	Participants viewed each clip and were asked to mark social and nonsocial events in counterbalanced blocks of trials.	clip	25 29	0	1
31140152	2019	Relevant SFs (PSF, SRSF3, and SRSF6) and target genes (INSR, SRSF3, and SLK) modulated in mice were investigated in a cohort of 179 hepatocellular carcinoma patients.	PSF	14 17	1	0
31140152	2019	Relevant SFs (PSF, SRSF3, and SRSF6) and target genes (INSR, SRSF3, and SLK) modulated in mice were investigated in a cohort of 179 hepatocellular carcinoma patients.	INSR	55 59	1	0
31140152	2019	Relevant SFs (PSF, SRSF3, and SRSF6) and target genes (INSR, SRSF3, and SLK) modulated in mice were investigated in a cohort of 179 hepatocellular carcinoma patients.	SLK	72 75	1	0
31140152	2019	Risk of tumor recurrence positively correlated with alternative splicing isoform of the INSR gene.	INSR	88 92	1	0
31140154	2019	OBJECTIVE: Cardiac amyloidosis is a rare disease characterized by amyloid heart deposits and is usually a part of systemic amyloidosis, in relation to systemic light chain (AL) and transthyretin (ATTR wild-type or genetic) amyloidosis.	ATTR	196200	0	1
31140180	2019	After tentative clipping to treat the severe atherosclerotic aneurysm in this patient, we applied supplementary clipping to the atherosclerotic area of the aneurysmal sac.	sac	167170	0	1
31140180	2019	The resulting squeezing of the intra-aneurysmal atheroma caused a leakage into the subadventitial layer of the aneurysmal sac.	sac	122125	0	1
31140247	2019	However, there were persistent T-wave inversions in leads I, aVL and V4-6.	V4-6	69 73	0	1
31140327	2019	The clinical dose definition of AAV vector requires the exact quantification as starting doses and for dose-escalation studies.	AAV	32 35	0	1
31140327	2019	However, qPCR-based determination of the AAV vector genome is affected by the selection of the quantitative pcr standard and the amplification target sites.	AAV	41 44	0	1
31140327	2019	Furthermore, the integrity of the AAV vector genome can be monitored using 2D ddPCR with fluorescein- and hexachloro-6-carboxy-fluorescine-labeled probes targeting different positions in the same recombinant adeno-associated virus genome.	AAV	34 37	0	1
31140328	2019	GSE80201 miRNA and GSE68776 mRNA microarray dataset were selected to carry out a series of bioinformatics analysis such as GEO 2R, gene ontology, pathway enrichment analysis, Venn analysis and PPI network construction to predict hub genes.	hub	229232	0	1
31140365	2019	At the same time, the number of senescent cells, associated with damage or stress that secretes proinflammatory factors (SASP or senescence-associated secretory phenotype), increases with age in many key tissues, including the kidneys, lungs, blood vessels, and brain.	SASP	121125	0	1
31140365	2019	A recent report links these processes, such that decreased NAD+ levels associated with aging may attenuate the SASP potentially reducing its pathological effect.	SASP	111115	0	1
31140365	2019	Conversely, increasing NAD+ levels by supplementation or genetic manipulation, which may benefit tissue homeostasis, also may worsen SASP and encourage tumorigenesis at least in mouse models of cancer.	SASP	133137	0	1
31140365	2019	On the contrary, the lower NAD+ levels may attenuate SASP, decreasing the pathological influence of senescence.	SASP	53 57	0	1
31140369	2019	The comparison of immunreactivity of ERK, TGFbeta and E-cadherin were different in the study groups than the control groups for all comparisons.	ERK	37 40	1	0
31140392	2019	The following measures were used as clustering variables, after canonical transformation: the SF36 physical and mental component summary (PCS and MCS), the Beck Depression Inventory II (entity of depression), the Facit-Fatigue, all assessed during the last visit.	PCS	138141	0	1
31140392	2019	The following measures were used as clustering variables, after canonical transformation: the SF36 physical and mental component summary (PCS and MCS), the Beck Depression Inventory II (entity of depression), the Facit-Fatigue, all assessed during the last visit.	MCS	146149	0	1
31140392	2019	The first cluster (43 patients) was characterised by the highest levels of MCS and PCS and the lowest entity of pain, fatigue and depression.	MCS	75 78	0	1
31140392	2019	The first cluster (43 patients) was characterised by the highest levels of MCS and PCS and the lowest entity of pain, fatigue and depression.	PCS	83 86	0	1
31140392	2019	Cluster 2 (35 patients) was defined by a reduction of MCS and increase of pain, fatigue and depression;	MCS	54 57	0	1
31140392	2019	Conversely, PCS levels were similar to cluster 1.	PCS	12 15	0	1
31140392	2019	In cluster 3 (52 patients) we found a reduction of MCS and increase of depression and fatigue (similar to cluster 2) but also a decrease in PCS levels and Bodily Pain (meaning increase in pain).	MCS	51 54	0	1
31140392	2019	In cluster 3 (52 patients) we found a reduction of MCS and increase of depression and fatigue (similar to cluster 2) but also a decrease in PCS levels and Bodily Pain (meaning increase in pain).	PCS	140143	0	1
31140433	2019	METHODS: We proposed a graphical retrieval method and validated its feasibility using an online CIM repository: openelectronic health record Clinical Knowledge Manager .	CIM	96 99	0	1
31140433	2019	In the evaluation, we defined three retrieval tasks (medication, laboratory test, and diagnosis) and compared our method with three typical retrieval methods (BM25F, simple Bayesian network, and CKM), using mean average precision, average precision, and precision at 10 (P@10) as evaluation metrics.	CKM	195198	0	1
31140442	2019	A New Tool for Public Health Opinion to Give Insight Into Telemedicine: Twitter Poll Analysis.	Poll	80 84	0	1
31140442	2019	The polls were placed on the Twitter timeline of one of the authors, which had more than 9300 followers, and the account followers were asked to answer the poll and retweet it to reach a larger audience.	poll	156160	0	1
31140442	2019	RESULTS: In a population where telemedicine was expected to enjoy big support, a significant number of Twitter users responding to the poll felt that telemedicine was not as good as traditional care.	poll	135139	0	1
31140444	2019	METHODS: A pre-post single-arm pilot study was carried out among a sample of 240 overweight volunteer Saudi women residing in Riyadh, Saudi Arabia who used the Twazon app over a 4-month period.	app	167170	0	1
31140444	2019	Frequency of app use and system usability were evaluated during the 2 latter data collection periods.	app	13 16	0	1
31140444	2019	An evaluation of the frequency of app use fostered 2 groups: engaged users (65%) and unengaged users (35%).	app	34 37	0	1
31140444	2019	CONCLUSIONS: The findings have demonstrated that engagement with the Twazon app renders positive changes in body weight, waist circumference, and energy intake.	app	76 79	0	1
31140446	2019	Development of Comprehensive Personal Health Records Integrating Patient-Generated Health Data Directly From Samsung S-Health and Apple Health Apps: Retrospective Cross-Sectional Observational Study.	Apps	143147	0	1
31140446	2019	However, no personal health records currently integrate patient-generated health data directly from Samsung S-Health and Apple Health apps.	apps	134138	0	1
31140446	2019	OBJECTIVE: The purposes of this study were (1) to demonstrate the development of an electronic medical record -tethered PHR system (Health4U) that integrates lifelog data from Samsung S-Health and Apple Health apps and (2) to explore the factors associated with the use rate of the functions.	PHR	120123	0	1
31140446	2019	OBJECTIVE: The purposes of this study were (1) to demonstrate the development of an electronic medical record -tethered PHR system (Health4U) that integrates lifelog data from Samsung S-Health and Apple Health apps and (2) to explore the factors associated with the use rate of the functions.	apps	210214	0	1
31140446	2019	For integration of daily steps data, 48.3% (104/215) of patients used the Apple Health app, 43.3% (93/215) used the S-Health app, and 8.4% (18/215) entered data manually.	app	87 90	0	1
31140446	2019	For integration of daily steps data, 48.3% (104/215) of patients used the Apple Health app, 43.3% (93/215) used the S-Health app, and 8.4% (18/215) entered data manually.	app	125128	0	1
31140446	2019	To retrieve medical documentation, 324 (1.84%) users downloaded PDF files and 31 (0.18%) users integrated their medical records into the Samsung S-Health app via the Consolidated-Clinical Document Architecture download function.	PDF	64 67	0	1
31140446	2019	To retrieve medical documentation, 324 (1.84%) users downloaded PDF files and 31 (0.18%) users integrated their medical records into the Samsung S-Health app via the Consolidated-Clinical Document Architecture download function.	app	154157	0	1
31140446	2019	We found a consistent increase in the odds ratios for PDF downloads among patients with a higher number of chronic diseases.	PDF	54 57	0	1
31140446	2019	CONCLUSIONS: This is the first study to examine the factors related to integration of lifelog data from Samsung S-Health and Apple Health apps into EMR-tethered personal health records and factors related to the retrieval of medical documents from personal health records.	apps	138142	0	1
31140475	2019	The tumor cell lysate loading capacity was 480 mug per mg of PDA NPs, and the resulting TCL@PDA NPs (241.9 nm) had perfect storage stability and negligible cytotoxicity against APCs.	mug	47 50	0	1
31140475	2019	The tumor cell lysate loading capacity was 480 mug per mg of PDA NPs, and the resulting TCL@PDA NPs (241.9 nm) had perfect storage stability and negligible cytotoxicity against APCs.	NPs	96 99	0	1
31140475	2019	The tumor cell lysate loading capacity was 480 mug per mg of PDA NPs, and the resulting TCL@PDA NPs (241.9 nm) had perfect storage stability and negligible cytotoxicity against APCs.	APCs	177181	0	1
31140475	2019	Tumor-bearing mice vaccinated with TCL@PDA NPs experienced significant delay in tumor progression due to the sufficient amount of CTLs and M1-type TAM as well as the deficient number of immunosuppression-related cells in the tumor tissues.	NPs	43 46	0	1
31140550	2019	MCL-MZGP was positive for BCL2 (96%, bright), CD5 (82%, moderate), cyclin D1 (100%), and SOX11 (89%).	CD5	46 49	1	0
31140608	2019	Total lipid content variation (% dry mass) of recently emerged fry caught in the Santa Cruz River, Argentina, was evaluated as a function of their maternal origin (anadromous v. resident) and fork length (length ).	fry	63 66	0	1
31140608	2019	Lipid content of fry decreased with length and was higher for offspring of anadromous mothers.	fry	17 20	0	1
31140637	2019	Major complications occurred in four fractures: premature pin loosening, elbow subluxation, osteomyelitis, and delayed union.	pin	58 61	0	1
31140647	2019	Epithelial SMAD4 loss causes overexpression of TGF that is released into the tumor microenvironment and contributes to SCC progression through proinflammatory and immune evasive mechanisms.	SCC	119122	0	1
31140647	2019	Such information will potentially guide future biomarker-driven clinical trial designs and improve SCC patient outcomes.	SCC	99102	0	1
31140666	2019	Cox proportional hazard models revealed that participants in the stereotype threat group were significantly less able to delay initiating smoking compared to the control group (hazard ratio = 0.504, P = 0.010, 95% confidence interval = 0.30, 0.85), after controlling for baseline latency to smoke.	Cox	0 3	0	1
31140669	2019	Around half the respondents agreed that it is wrong to sell treatments lacking scientific evidence;	sell	55 59	0	1
31140714	2019	Relative mRNA levels of PPARgamma, Col2A1, Acan, Runx2, HIF1alpha, and EGR1 were measured with real-time PCR.	Acan	43 47	1	0
31140734	2019	Intestinal epithelial cells from EW-sensitized mice upregulate Il33 and Tslp to a higher extent than those from tolerized mice and induce bone marrow -dendritic cells to express Tnfsf4 and produce pro-inflammatory cytokines.	Tslp	72 76	1	0
31140827	2019	Methods: Concentration of AFU and AFP were measured in 512 patients.	AFP	34 37	1	0
31140827	2019	The performance was compared for AFU and AFP alone or in combination.	AFP	41 44	1	0
31140827	2019	Whereas the area under the curve for AFP was 0.83, with a sensitivity of 58.2% and specificity of 85.2% at cut-off value of 20 ng/ml.	AFP	37 40	1	0
31140827	2019	The area under the curve of AFU alone or the combination with AFP were lower than that of AFP alone.	AFP	62 65	1	0
31140827	2019	The area under the curve of AFU alone or the combination with AFP were lower than that of AFP alone.	AFP	90 93	1	0
31140839	2019	For SBP, significant associations were only observed in children with major environmental tobacco smoke exposure from father and with cigarettes smoking >10/day.	SBP	4 7	0	1
31140859	2019	EZH2 Confers Sensitivity of Breast Cancer Cells to Taxol by Attenuating p21 Expression Epigenetically.	p21	72 75	1	0
31140859	2019	Meanwhile, p21, the inhibitor of cell cycle entry, interference upregulated, while overexpression downregulated apoptosis induced by taxol.	p21	11 14	1	0
31140859	2019	Mechanistically, EZH2 was recruited to the promoter of p21 accompanied with H3K27me3 enrichment and transcription silencing.	p21	55 58	1	0
31140859	2019	Collectively, EZH2 attenuates chemoresistance of breast cancer cells to taxol by dampening p21 epigenetically.	p21	91 94	1	0
31140866	2019	Results: Described here is the synthesis and biological evaluation of a tiny series of new virtually assembled novel bacterial topoisomerase inhibitors containing synthetically feasible right-hand side fragments capable of binding the GyrA subunit of the bacterial DNA gyrase-DNA complex.	GyrA	235239	1	0
31140926	2019	The active ingredient blocks electron transfer at the quinone outside inhibitor site in the mitochondrial cytochrome b within the bc1 complex, thus obstructing respiration.	bc1	130133	0	1
31140960	2019	Maternal and umbilical blood serum cytokines (adiponectin (APN), IL-6 and interferon-gamma) were measured via ELISA.	APN	59 62	1	0
31140960	2019	Four dietary patterns were identified: a mainly fruit, dairy products and poultry diet (FDP);	FDP	88 91	0	1
31140960	2019	Maternal and fetal APN were positively associated with birth weight (beta=0 045 and 0 226, respectively), and they mediated the association between the TE pattern and birth weight (indirect effect was 5 3 %).	APN	19 22	1	0
31140960	2019	Maternal IL-6 was negatively associated with birth weight (beta=-0 067) and mediated the association between maternal FDP and VBP patterns and birth weight (indirect effects were 10 1 and 100 0 %, respectively).	FDP	118121	0	1
31140976	2019	Club cells are shown to survive KRAS mutations and to form lung tumors after tobacco carcinogen exposure.	KRAS	32 36	1	0
31141007	2019	This study aimed to investigate the relationship between the changes in clinical periodontal outcomes and serum biomarkers (CRP, IL-6, albumin and percentage of leukocytes) after non-surgical periodontal therapy in systemically healthy adults.	CRP	124127	1	0
31141007	2019	The correlation analysis revealed a directly proportional correlation between changes in the probing depth (r = 0.349, P = 0.049) and clinical attachment level (r = 0.374, P = 0.034) with CRP in the chronic periodontitis group.	CRP	188191	1	0
31141048	2019	RESULTS: bla NDM-1, aac(6')-Ib-cr and acrB resistance genes, and cps and mrkD virulence genes were detected.	mrkD	73 77	1	0
31141088	2019	Furthermore, curcumae rhizoma-sparganii rhizoma extensively regulated key pathways of the uterine leiomyoma process, such as MAPK, PPAR, Notch, and TGF-beta/Smad.	MAPK	125129	1	0
31141088	2019	Furthermore, curcumae rhizoma-sparganii rhizoma extensively regulated key pathways of the uterine leiomyoma process, such as MAPK, PPAR, Notch, and TGF-beta/Smad.	PPAR	131135	1	0
31141159	2019	In the matched cohort, glibenclamide treatment was associated with lighter brain edema, when CED score was used for evaluation.	CED	93 96	0	1
31141218	2019	Cox regression analyses indicated that tumor cell-derived transforming growth factor-beta at tumor center was an independent risk factor for survival outcome in patients with oral squamous cell carcinoma.	Cox	0 3	0	1
31141221	2019	Following oral administration of ginseng stem and leaf saponins, mice immunized with an attenuated PrV vaccine diluted in Se-containing physiological saline solution provoked a significantly stronger gB-specific serum antibodies response (IgG, IgG1 and IgG2a), enhanced lymphocyte proliferation and cytolytic activity of NK cells, along with higher production of cytokines (IFN-gamma, IL-12, IL-5 an…	IgG	239242	1	0
31141235	2019	High indirect fitness benefits for helpers across the nesting cycle in the tropical paper wasp Polistes canadensis.	wasp	90 94	0	1
31141277	2019	AIM: The aim of present work was to explore the potential of Chlorella sp. SRD3 extracts for antioxidant and antibacterial activity along with the evaluation of minimum inhibitory concentration and haemolytic activity to detect RBC cell damage.	RBC	228231	0	1
31141299	2019	AIMS: The aim of this study was to evaluate the effectivity of combined FCL and FmRF treatment for acne scars retrospectively.	FCL	72 75	0	1
31141299	2019	METHODS: A total of 72 patients with acne scars who received FCL + FmRF treatment between 2014 and 2016 were included in this study.	FCL	61 64	0	1
31141299	2019	CONCLUSIONS: In conclusion, our findings revealed association of FCL + FmRF treatment with significantly improved ECCA scores, mild pain experience, and low rate of side effects in patients with acne scars, despite usage of high-energy FLC dose and five sessions of treatment on average.	FCL	65 68	0	1
31141305	2019	Genetic interaction between DNA repair factors PAXX, xrcc4-like factor, XRCC4 and DNA-PKcs in human cells.	PAXX	47 51	1	0
31141305	2019	Ku70 and Ku80 are DSB sensors that facilitate the recruitment of downstream factors, including protein kinase DNA-dependent protein kinase, catalytic subunit (DNA-PKcs), structural components [X-ray repair cross-complementing protein 4 (XRCC4), XRCC4-like factor, and paralogue of XRCC4 and xrcc4-like factor (PAXX)], and DNA ligase IV, which complete DNA repair.	PAXX	310314	1	0
31141305	2019	Here, we obtained genetically modified human HAP1 cell lines, which lacked one or two nonhomologous end joining factors, including ligase iv, XRCC4, xrcc4-like factor, PAXX, DNA-PKcs, DNA-PKcs/XRCC4, and DNA-PKcs/PAXX.	PAXX	168172	1	0
31141305	2019	In addition, we determined the genetic interaction between XRCC4 paralogues (XRCC4, xrcc4-like factor, and PAXX) and DNA-PKcs.	PAXX	107111	1	0
31141305	2019	We found that in human cells, xrcc4-like factor, but not PAXX or XRCC4, genetically interacts with DNA-PKcs.	PAXX	57 61	1	0
31141305	2019	Moreover, ataxia-telangiectasia mutated possesses overlapping functions with DNA-PKcs, xrcc4-like factor, and XRCC4, but not with PAXX in response to double-strand breaks.	PAXX	130134	1	0
31141333	2019	Polymer binding resulted in successful delivery of both native and synthetically modified siRNAs to HepG2 cells in culture, yielding in low nanomolar IC50 silencing of the endogenous ApoB target, in line with observations of expected Dicer processing of the polymer-siRNA targeting complex.	ApoB	183187	1	0
31141333	2019	Gratifyingly, we observed significant ApoB silencing in a preliminary animal study, validating bifacial polymer nucleic acid as an in vivo carrier platform for systemic siRNA delivery.	ApoB	38 42	1	0
31141338	2019	A pyrG deficient strain was also created, so that both the pyrG and hph resistance gene can be used as selection markers.	hph	68 71	1	0
31141467	2019	Catabolic enzyme activity (carnitine palmitoyl transferase [CPT], 3-hydroxyacyl-CoA dehydrogenase [HOAD], and citrate synthase ) in the muscle was increased during lactation compared with early pregnancy but exhibited no change before fall migration.	CPT	60 63	1	0
31141482	2019	Molecular screening of KCNJ11, INS, ABCC8 and EIF2AK3 was performed at the Exeter Molecular Genetics Laboratory, UK.	INS	31 34	1	0
31141483	2019	Methods A retrospective study was conducted at The First Affiliated Sun Yat Sen University Pediatric Endocrine unit between September 1989 and July 2016.	Sen	76 79	0	1
31141483	2019	The etiologies of the 49 cases were adrenoleukodystrophy (ALD; n = 22), X-linked adrenal hypoplasia congenital (X-AHC; n = 20), autoimmune polyglandular syndrome (APS; n = 3), triple A syndrome (n = 2), steroidogenic factor 1 gene mutation (n = 1) and adrenalectomy (n = 1).	ALD	58 61	0	1
31141483	2019	The etiologies of the 49 cases were adrenoleukodystrophy (ALD; n = 22), X-linked adrenal hypoplasia congenital (X-AHC; n = 20), autoimmune polyglandular syndrome (APS; n = 3), triple A syndrome (n = 2), steroidogenic factor 1 gene mutation (n = 1) and adrenalectomy (n = 1).	APS	163166	0	1
31141504	2019	Northern and Central Asia have largely been neglected as it has been assumed that the deserts and mountain ranges of these regions acted as 'barriers', forcing human populations to arc north into temperate and arctic Siberia.	arc	181184	0	1
31141516	2019	The missed potential of CD4 and viral load testing to improve clinical outcomes for people living with HIV in lower-resource settings.	CD4	24 27	1	0
31141516	2019	In a Policy Forum, Peter Ehrenkranz and colleagues discuss the contribution of CD4 and viral load testing to outcomes for people with HIV in low- and middle-income countries.	CD4	79 82	1	0
31141523	2019	Hepatocellular carcinoma in male mice was induced by a single-dose intraperitoneal administration of DEN and was promoted by the introduction of PB via drinking water for 12 weeks.	DEN	101104	0	1
31141524	2019	Empirical ways to identify novel Bedaquiline resistance mutations in AtpE.	AtpE	69 73	1	0
31141524	2019	Here we investigate the structural basis for M. tuberculosis associated bedaquiline resistance in the drug target, AtpE.	AtpE	115119	1	0
31141524	2019	Together with the 9 previously identified resistance-associated variants in AtpE, 54 non-resistance-associated mutations were identified through comparisons of bedaquiline susceptibility across 23 different mycobacterial species.	AtpE	76 80	1	0
31141532	2019	The majority (95%, N = 245) of Tufted puffins were adults regrowing flight feathers, indicating a potential contribution of molt stress.	molt	124128	0	1
31141532	2019	We posit that shifts in prey composition and/or distribution, combined with the onset of molt, resulted in this mortality event.	molt	89 93	0	1
31141540	2019	In conclusion, the current research revealed that the compounds with potential liver injury including diosgenin, baicalin, saikosaponin D, tetrandrine, rutaecarpine and evodiamine from urate-lowering Chinese herbs, could lead to decline the survival rate of L-02 cell, increase the activities of aspartate aminotransferase, alanine aminotransferase, lactate dehydrogenase and alkaline phosphatase in…	p38	468471	1	0
31141546	2019	Similarly, the pooled results were not statistically or clinically different between groups for function at 3-, 6-month and 1-year follow ups (very low quality, 2 RCTs, 184 patients, SMD 0.11, 95% CI: -0.57 to 0.79, p = 0.75; moderate quality, 3 RCTs, 310 patients, SMD 0.15, 95% CI: -0.14 to 0.43, p = 0.31; very low quality, 2 RCTs, 197 patients, SMD 0.11, 95% CI: -0.46 to 0.69, p = 0.70) respect…	ups	138141	0	1
31141552	2019	Yttrium-90 trans-arterial radioembolization in advanced-stage HCC: The impact of portal vein thrombosis on survival.	HCC	62 65	0	1
31141552	2019	PURPOSE: Portal vein thrombosis is generally recognized as a prognostic factor in HCC.	HCC	82 85	0	1
31141552	2019	Our purpose is to assess and compare the survival of patients with portal vein thrombosis and without portal vein thrombosis, after Y-90 Trans-Arterial Radio-Embolization of unresectable HCC, unresponsive to other loco-regional treatments.	HCC	187190	0	1
31141552	2019	MATERIALS AND METHODS: Between November 2005 and November 2012, Y-90 resin-based trans-arterial radio-embolization was performed in an IRB-approved prospective protocol, on 89 patients with unresectable HCC.	HCC	203206	0	1
31141554	2019	We also examined histopathologic change and pro-, anti-inflammatory cytokines and enzymes from harvested colons (iNOS, COX-2, TNF-alpha, MCP-1, p-NrF2, and HO-1).	iNOS	113117	1	0
31141554	2019	Colonic expression of iNOS, COX-2, TNF-alpha, and MCP-1 was decreased significantly in the apocynin treated group.	iNOS	22 26	1	0
31141555	2019	Using this novel approach, we studied the spleens from a syndecan-3 knockout mouse line, and demonstrated equal results on SNS fiber density for both manual and automated counts (Manual counts: wildtype: 22.57 +/- 11.72 fibers per mm2; ko: 31.95 +/- 18.85 fibers per mm2; p = 0.05; Automated counts: wildtype: 31.6 +/- 18.98 fibers per mm2; ko: 45.49 +/- 19.65 fibers per mm2; p = 0.02).	SNS	123126	0	1
31141563	2019	Microfilaria infection intensity varied from 1 to 120 per 50 mul of blood.	mul	61 64	0	1
31141566	2019	PCA, LDA, PLS-DA and OPLS-DA formalisms were used.	PCA	0 3	0	1
31141566	2019	PCA discriminated the samples from healthy volunteers from diseased patient samples.	PCA	0 3	0	1
31141586	2019	The objective of this study was to use image-based CFD simulation techniques to analyze the impact that multiple closely spaced IAs of the supra-clinioid segment of the ICA have on each other's hemodynamic characteristics.	CFD	51 54	0	1
31141586	2019	Simulations using a pulsatile velocity waveform were solved by a commercial CFD solver.	CFD	76 79	0	1
31141586	2019	Among adjacent IAs, the presence of both IAs decreased each other's flow characteristics, lowering WSS (Model A to B) and increasing flow stability: all changes statistically significant (t-test p < 0.05).	WSS	99102	0	1
31141591	2019	A Multi-Modality Image-Based FSI Modeling Approach for Prediction of Coronary Plaque Progression Using intravascular ultrasound and optical coherence tomography Data with Follow-Up.	FSI	29 32	0	1
31141591	2019	3D FSI models based on intravascular ultrasound and optical coherence tomography data (denoted as IVUS+optical coherence tomography model) were constructed to obtain stress/strain and wall shear stress for plaque progression prediction.	FSI	3 6	0	1
31141609	2019	Tau Is Involved in Death of Retinal Ganglion Cells of Rats From Optic Nerve Crush.	Tau	0 3	1	0
31141609	2019	Methods: Short interfering RNA of the tau gene (si-Tau) or nontargeting short interfering rna was injected intravitreally 48 hours prior to optic nerve crush.	tau	38 41	1	0
31141609	2019	The effects of silencing the tau gene on neuroprotection were determined by the number of Tuj-1-stained retinal ganglion cells on days 7 and 14 after the optic nerve crush.	tau	29 32	1	0
31141609	2019	The changes in the expressions of phosphorylated tau, P62, and LC3B were determined by immunoblots and immunohistochemistry on day 7.	P62	54 57	1	0
31141609	2019	Results: Autophagy was impaired in the retina on day 7 after the optic nerve crush as the P62 level increased by 3.1-fold from the sham control level with a reduction in the ratio LC3B2/LC3B1.	P62	90 93	1	0
31141609	2019	The expressions of tau and P62 were well colocalized.	tau	19 22	1	0
31141609	2019	The expressions of tau and P62 were well colocalized.	P62	27 30	1	0
31141609	2019	Conclusions: Silencing the tau gene is neuroprotective, and tauopathies may be involved in the death of retinal ganglion cells after optic nerve crush.	tau	27 30	1	0
31141613	2019	Following the first meeting in Tokyo on December 2015, the second meeting in Seoul, Korea 2016, the third meeting in Chiang Mai, Thailand, on October 2017, the fourth meeting was held in Seoul, again on August 2018 with the participation of members and collaborators from 13 countries and regions.	Mai	124127	0	1
31141613	2019	Finally, a close relationship between prevalence of PSA test and disease stage of the patients at diagnosis in Japan and Malaysia was discussed.	PSA	52 55	1	0
31141631	2019	All patients had at least one of the following features: chromosome 17p deletion, mutated TP53, chromosome 11q deletion, unmutated IGHV, or an age of 65 years or older.	IGHV	131135	1	0
31141631	2019	Overall, 92% of the patients had unmutated IGHV, TP53 aberration, or chromosome 11q deletion.	IGHV	43 47	1	0
31141702	2019	Lenalidomide likely targets pathways downstream of the nuclear translocation of the transcription factors nuclear factor kappaB and IFN regulatory 5 in CD1c+ DCs.	IFN	132135	1	0
31141802	2019	A significant decrease in relative SIRT1 (p< 0.05) and increase in IFNG (p< 0.05) expression levels was observed in the sorted CD8+T cells of severe aplastic anemia patients compared to the controls.	IFNG	67 71	1	0
31141802	2019	There was a significant negative correlation (r = -0.53, p < 0.05) between SIRT1 and IFNG expression in severe aplastic anemia patients.	IFNG	85 89	1	0
31141815	2019	Working with psychotic patients, he realized that it was first necessary to "absorb" their view of reality before being able to reflect on the mad scenarios of psychosis.	mad	143146	0	1
31141855	2019	Histopathology sections from the nail matrix biopsy specimen showed a dermal proliferation of bland appearing spindle shaped cells with elongated, blunt ended nuclei (SMA and caldesmon positive), arranged in fascicles, which is typical of leiomyomas.	SMA	167170	1	0
31141866	1991	ALVINN is a backpropagation network designed to drive the CMU Navlab, a modified Chevy van.	van	87 90	0	1
31141900	2019	The effect of hypercaloric diets (high fat (HF), high sucrose, high fat plus high sucrose (HFHSu) and high fat plus streptozotocin (HF+STZ) during different exposure times (HF 3 weeks, HF 19 weeks, high sucrose 4 weeks, high sucrose 16 weeks, HFhigh sucrose 25 weeks, HF3 weeks + STZ) were compared with the Zucker fatty rat.	STZ	280283	0	1
31141909	2019	Patients in whom circulating PIIINP decreased had significantly lower baseline serum albumin, lower baseline mean arterial blood pressure, higher serum CRP, and a less significant improvement in hospitalization rate compared to the patients in whom circulating PIIINP increased.	CRP	152155	1	0
31141911	2019	Transcriptional Expression of the ompA, cpaf, tarp, and tox Genes of Chlamydia trachomatis Clinical Isolates at Different Stages of the Developmental Cycle.	ompA	34 38	1	0
31141911	2019	Transcriptional Expression of the ompA, cpaf, tarp, and tox Genes of Chlamydia trachomatis Clinical Isolates at Different Stages of the Developmental Cycle.	tarp	46 50	1	0
31141911	2019	Transcriptional Expression of the ompA, cpaf, tarp, and tox Genes of Chlamydia trachomatis Clinical Isolates at Different Stages of the Developmental Cycle.	tox	56 59	1	0
31141911	2019	Here, using five low-passage-number C. trachomatis clinical isolates that originated from asymptomatic or symptomatic female patients, the in vitro expression of the ompA, cpaf, tarp, and tox genes was studied with reverse transcriptase real-time PCR during the chlamydial developmental cycle.	ompA	166170	1	0
31141911	2019	Here, using five low-passage-number C. trachomatis clinical isolates that originated from asymptomatic or symptomatic female patients, the in vitro expression of the ompA, cpaf, tarp, and tox genes was studied with reverse transcriptase real-time PCR during the chlamydial developmental cycle.	tarp	178182	1	0
31141911	2019	Here, using five low-passage-number C. trachomatis clinical isolates that originated from asymptomatic or symptomatic female patients, the in vitro expression of the ompA, cpaf, tarp, and tox genes was studied with reverse transcriptase real-time PCR during the chlamydial developmental cycle.	tox	188191	1	0
31141911	2019	The expression of ompA and the peak of the tox expression were observed earlier in the reference strains than in most of the clinical isolates.	ompA	18 22	1	0
31141911	2019	The expression of ompA and the peak of the tox expression were observed earlier in the reference strains than in most of the clinical isolates.	tox	43 46	1	0
31141911	2019	All of the strains had a rather similar tarp expression profile.	tarp	40 44	1	0
31141932	2019	Mutational analyses for EGFR and KRAS were performed using direct sequencing, immunohistochemistry or MassARRAY.	EGFR	24 28	1	0
31141932	2019	Mutational analyses for EGFR and KRAS were performed using direct sequencing, immunohistochemistry or MassARRAY.	KRAS	33 37	1	0
31141932	2019	Anaplastic lymphoma kinase rearrangement was evaluated by immunohistochemistry using the D5F3 clone, and p53 expression was also assessed.	p53	105108	1	0
31141932	2019	Using different methodologies, EGFR mutations were found in 5.47% of patients and only exon 19 deletions "E746-A750 del" were detected.	EGFR	31 35	1	0
31141932	2019	KRAS mutations were present in 9.58% of cases, while only one patient was ALK-positive.	KRAS	0 4	1	0
31141932	2019	Moreover, abnormal immunostaining of p53 was detected in 56.16% of patients.	p53	37 40	1	0
31141932	2019	In conclusion, the detected rates of EGFR and KRAS mutation and anaplastic lymphoma kinase rearrangement were lower than those found in European and Asian countries, whereas, abnormal p53 expression was slightly more frequent.	EGFR	37 41	1	0
31141932	2019	In conclusion, the detected rates of EGFR and KRAS mutation and anaplastic lymphoma kinase rearrangement were lower than those found in European and Asian countries, whereas, abnormal p53 expression was slightly more frequent.	KRAS	46 50	1	0
31141932	2019	In conclusion, the detected rates of EGFR and KRAS mutation and anaplastic lymphoma kinase rearrangement were lower than those found in European and Asian countries, whereas, abnormal p53 expression was slightly more frequent.	p53	184187	1	0
31141935	2019	Additionally, the diet quality, measured using NRF 9.3 scoring method, was higher among yogurt consumers compared to non-consumers.	NRF	47 50	0	1
31141941	2019	Tristetraprolin (TTP), a well-characterized AU-rich element binding protein, functions as a tumor suppressor gene.	TTP	17 20	1	0
31141941	2019	The purpose of this study was to investigate whether a bioactive substance derived from a natural medicinal plant affects the induction of TTP and to elucidate its mechanism.	TTP	139142	1	0
31141941	2019	We examined the effects of natural bioactive materials including Resveratrol, thymoquinone and curcumin on the expression of TTP in cancer cell.	TTP	125128	1	0
31141941	2019	Thymoquinone derived from a natural plant Nigella sativa increased the expression levels of TTP mRNA and proteins in a dose-dependent manner in gastric and breast cancer cells.	TTP	92 95	1	0
31141941	2019	TQ-induced TTP increased the instability of MUC4 mRNA by direct binding of TTP to au-rich element in the 3'UTR of MUC4 mRNA.	TTP	11 14	1	0
31141941	2019	TQ-induced TTP increased the instability of MUC4 mRNA by direct binding of TTP to au-rich element in the 3'UTR of MUC4 mRNA.	TTP	75 78	1	0
31141941	2019	The induction of TTP by thymoquinone also reduced the proliferation, migration and invasion of cancer cells.	TTP	17 20	1	0
31141941	2019	The expression of the epithelial-mesenchymal -related genes, which were target genes of TTP, was also decreased by the thymoquinone treatment.	TTP	88 91	1	0
31141941	2019	In the in vivo experiments using mouse melanoma cells, TQ-induced TTP inhibited metastasis of tumor cells.	TTP	66 69	1	0
31141941	2019	We have found that TQ-induced TTP might inhibit metastasis by reducing tumor cell migration and invasion through destabilization of MUC4 mRNA, which suggest the MUC4 as a novel target to TTP.	TTP	30 33	1	0
31141941	2019	We have found that TQ-induced TTP might inhibit metastasis by reducing tumor cell migration and invasion through destabilization of MUC4 mRNA, which suggest the MUC4 as a novel target to TTP.	TTP	187190	1	0
31141948	2019	Elaeagnus glabra f. oxyphylla treatment also attenuated neural apoptosis in scopolamine-treated mice by decreasing the expression of apoptosis-related proteins such as Bax, Bcl2, cleaved caspase-3, and TUNEL staining.	Bax	168171	1	0
31141975	2019	In comparison, the metabolism pathways that function in plasma dehydration protection and protein structure protection were strongly enhanced, as indicated by the improved biosynthesis of 2 osmolytes, sucrose and Proline, and strongly up-regulated protective proteins, LEA proteins and chaperones.	LEA	269272	1	0
31141975	2019	SUS4, P5CSs, OAT, Rab protein, and Lea14-A were considered to be important candidate proteins, which deserve to be further investigated.	Rab	18 21	1	0
31142002	2019	Fibroblast growth factor 21 retained MSC abilities of proliferation and morphology.	MSC	37 40	0	1
31142002	2019	MSC-fibroblast growth factor 21 showed significantly greater migration in transwell assay compared to control MSC.	MSC	110113	0	1
31142002	2019	Magnetic resonance imaging revealed that fibroblast growth factor 21 significantly enhances the homing of MSC toward injury site.	MSC	106109	0	1
31142002	2019	Taken together, these results show that fibroblast growth factor 21 overexpression and molday ionevergreen labeling of MSC enhances their homing abilities and enables non-invasive real time tracking of the transplanted cells, provides a promising approach for MSC based therapy and tracking in traumatic brain injury.	MSC	119122	0	1
31142002	2019	Taken together, these results show that fibroblast growth factor 21 overexpression and molday ionevergreen labeling of MSC enhances their homing abilities and enables non-invasive real time tracking of the transplanted cells, provides a promising approach for MSC based therapy and tracking in traumatic brain injury.	MSC	260263	0	1
31142040	2019	Analyzing variation across these two metrics revealed 171 scaffolds containing 3.37 Mbp of putative Y-chromosome sequence.	Mbp	84 87	0	1
31142040	2019	The gene content of these scaffolds is consistent overall with that of the Y-chromosome in other carnivore species, though the red fox Y-chromosome carries more copies of BCORY2 and UBE1Y than has been reported in related species and fewer copies of SRY than in other canids.	SRY	250253	1	0
31142050	2019	Individually and in combination with bromodeoxyuridine, there were reductions in CD68 (monocytes) and Sox2 (immature neural precursors) and increases in Blbp (radial glia) expression.	Blbp	153157	1	0
31142050	2019	Individually and in combination with bromodeoxyuridine, there were reductions in CD68 (monocytes) and Sox2 (immature neural precursors) and increases in Blbp (radial glia) expression.	glia	166170	1	0
31142050	2019	CD68-positive cells showed increased co-staining with iNOS.	iNOS	54 58	1	0
31142050	2019	No differences in the expression of GFAP (glia) and NG2 (oligodendrocytes) or in GFAP cell morphology were found.	GFAP	36 40	1	0
31142050	2019	No differences in the expression of GFAP (glia) and NG2 (oligodendrocytes) or in GFAP cell morphology were found.	NG2	52 55	1	0
31142050	2019	No differences in the expression of GFAP (glia) and NG2 (oligodendrocytes) or in GFAP cell morphology were found.	GFAP	81 85	1	0
31142054	2019	The identification of driver oncogenes such as EGFR, ALK, ROS1, BRAF and HER2 has already been successfully translated into clinical practice for individuals with solid tumor.	EGFR	47 51	1	0
31142054	2019	The identification of driver oncogenes such as EGFR, ALK, ROS1, BRAF and HER2 has already been successfully translated into clinical practice for individuals with solid tumor.	ALK	53 56	1	0
31142054	2019	The identification of driver oncogenes such as EGFR, ALK, ROS1, BRAF and HER2 has already been successfully translated into clinical practice for individuals with solid tumor.	BRAF	64 68	1	0
31142057	2019	As a result, the obtained Ta2O5-rGO-glassy carbon electrode shows larger electrochemical activity area than other bare glassy carbon electrode and rGO-GCE due to the synergistic effect of Ta2O5 NPs and rGO.	NPs	194197	0	1
31142058	2019	This narrative review focuses on NPs' physiology, diagnosis, therapeutic and prognostic implication in HFpEF.	NPs	33 36	0	1
31142071	2019	Multivariate analysis was undertaken using the Cox proportional hazard model (forward stepwise regression).	Cox	47 50	0	1
31142082	2019	The maximum systolic blood pressures drop (systolic blood pressures of supine minus the lowest systolic blood pressures during postural changes) of direct standing group was significantly higher than indirect standing group (median 20.5(14.0, 29.3) vs. 18.0(11.0, 26.0) mmHg (1 mmHg=0.133 kPa, P<0.05).	kPa	289292	0	1
31142197	2019	The primary outcome was to describe the relationship between Met-hemoglobin and other indices of tissue oxygenation (venous saturation, estimated arteriovenous oxygen difference [Est AV-Diff], and lactate).	Est	179182	0	1
31142197	2019	Venous Met-hemoglobin demonstrated a significant inverse relationship with venous oxygen saturation (R = -0.6; P < .001) and hemoglobin (R = -0.3, P < .001) and a direct relationship with the Est AV-Diff (R = 0.3, P < .001).	Est	192195	0	1
31142197	2019	A total of 129 (29.6%) venous Met-hemoglobin values were elevated ( 1.0%) and were associated with significantly lower hemoglobin and venous saturation levels and higher Est AV-Diff and lactate levels.	Est	170173	0	1
31142229	2019	GFAP: glial fibrillary acidic protein;	GFAP	0 4	1	0
31142229	2019	TGN: trans-Golgi network;	TGN	0 3	0	1
31142255	2019	Investigations were done in form of liver function tests (ALT, AST, ALP, serum bilirubin, and serum albumin), PT, PTT, CBC.	AST	63 66	1	0
31142255	2019	Investigations were done in form of liver function tests (ALT, AST, ALP, serum bilirubin, and serum albumin), PT, PTT, CBC.	ALP	68 71	1	0
31142255	2019	Antithrombin III and protein C showed significant negative correlation with (ALT, AST, PT, PTT, INR).	AST	82 85	1	0
31142259	2019	Of all the 86 isolates with resistance to fluoroquinolones and having at least one mutation (Ser83Leu, His211Tyr, or Asp87Gly) in the the quinolone resistance-determining regions of gyrA, 79 also had mutation of parC (Ser80Ile), whereas 7 contained plasmid-mediated quinolone resistance genes including qnrA, qnrB, qnrS, and aac(60)-Ib-cr.	parC	212216	1	0
31142262	2019	Aura and Stroke: relationship and what we have learnt from preclinical models.	Aura	0 4	0	1
31142262	2019	Migraine, especially with aura, is a risk factor for both ischemic and hemorrhagic stroke.	aura	26 30	0	1
31142262	2019	Therapeutic targeting of spreading depolarization and microembolic events, or potential causes thereof, will be promising for treatment of aura and may also prevent ischemic infarction in vulnerable brains.	aura	139143	0	1
31142273	2019	The present study aims to investigate whether intravenous thrombolysis followed by endovascular therapy (CoT, combined therapy) provides additional benefits over direct endovascular therapy for anterior circulation acute ischemic stroke with large vessel occlusion.	CoT	105108	0	1
31142273	2019	RESULTS: 145 subjects were included in the study, of whom 70 underwent direct endovascular therapy and 75 were treated with CoT.	CoT	124127	0	1
31142273	2019	Functional independence at 3-months was more frequent in CoT subjects compared to patients who received direct endovascular therapy (mRS score 0-1: 48.5% vs 18.6%; P < 0.001. mRS score 0-2: 67.1% vs 37.3%; P < 0.001);	CoT	57 60	0	1
31142273	2019	Functional independence at 3-months was more frequent in CoT subjects compared to patients who received direct endovascular therapy (mRS score 0-1: 48.5% vs 18.6%; P < 0.001. mRS score 0-2: 67.1% vs 37.3%; P < 0.001);	mRS	133136	0	1
31142273	2019	Functional independence at 3-months was more frequent in CoT subjects compared to patients who received direct endovascular therapy (mRS score 0-1: 48.5% vs 18.6%; P < 0.001. mRS score 0-2: 67.1% vs 37.3%; P < 0.001);	mRS	175178	0	1
31142273	2019	CoT patients had also higher first-pass success rate (62.7% vs 38.6%, P < 0.05), higher recanalization rate (84.3% vs 65.3%; P = 0.009) and, in recanalized subjects, smaller EFIV (16.4 ml vs 62.3 ml; P = 0.003).	CoT	0 3	0	1
31142273	2019	In multivariable regression analysis, low baseline NIHSS score (P < 0.05), vessel recanalization (P = 0.05) and CoT (P = 0.03) were independent predictors of favorable outcome at three months.	CoT	112115	0	1
31142273	2019	CONCLUSIONS: CoT appears more effective than endovascular therapy alone for anterior circulation acute ischemic stroke with large vessel occlusion, with similar safety profile.	CoT	13 16	0	1
31142279	2019	Cox regression was used to detect variants associated with clinical outcomes.	Cox	0 3	0	1
31142285	2019	An IgM kappa type of monoclonal gammopathy was noted by immunofixation performed on the patient's serum.	IgM	3 6	1	0
31142285	2019	Immunohistochemically, these crystal-containing cells were positive for CD68/PGM1, CD163, IgM, and Igkappa.	IgM	90 93	1	0
31142285	2019	Immunohistochemistry for IgM was positive in the cytoplasm of some neoplastic cells.	IgM	25 28	1	0
31142286	2019	All statistical analyses were carried out using the Statistical Analysis Software version 9.2 (SAS 9.2).	SAS	95 98	0	1
31142296	2019	METHODS: Four hundred eighty-two patients (602 hips) who underwent Forte or Delta ceramic-on-ceramic THAs with a single hip system and had a minimum 5-year follow-up were identified.	THAs	101105	0	1
31142303	2019	The purpose of the study was to investigate 1) the differences in clinical outcome, thigh pain and stem survival for patients with and without CHs and 2) to identify patient and surgery-related factors being associated with the development of CHs.	CHs	143146	0	1
31142303	2019	The purpose of the study was to investigate 1) the differences in clinical outcome, thigh pain and stem survival for patients with and without CHs and 2) to identify patient and surgery-related factors being associated with the development of CHs.	CHs	243246	0	1
31142303	2019	There was no significant difference for the Harris Hip Score and UCLA score for patients with and without CHs.	CHs	106109	0	1
31142303	2019	The Kaplan Meier survival rate after 8.6 years was 99.6% (95%-CI; 97.1-99.9%) for stem revision due to aseptic loosening and no association with CHs could be detected.	CHs	145148	0	1
31142303	2019	Postoperative increase in hip offset was the only risk factor being associated with the development of CHs in the regression model (deltaHO; OR 1.1 (1.0-1.2);	CHs	103106	0	1
31142317	2019	MTS, clonogenic, Transwell assay, Flow cytometry verified cell function.	MTS	0 3	0	1
31142319	2019	With a clustering analysis of 60 published bovine leukemia virus env sequences, genotypes 1 and 6 were confirmed to be circulating in Heilongjiang.	env	65 68	1	0
31142320	2019	RESULTS: Case 1: A 62-year-old man was hospitalized for left-sided palpable neck mass, hypercalcemia and elevated PTH.	PTH	114117	1	0
31142327	2019	Further, the likelihood of delivering LBW baby decreased with every additional ANC visit (OR 0.78 95%CI 0.67-0.90) and with every additional gram of haemoglobin (OR 0.78 95%CI 0.63-0.95).	ANC	79 82	0	1
31142327	2019	CONCLUSION: The evidence from this study suggests that maternal educational level, residence, haemoglobin level, parity, number of ANC visits, and gestational age are independent predictors of low birth weight.	ANC	131134	0	1
31142338	2019	RESULTS: After adjustment for age, sex, and potential confounders, each standard deviation increment of MHR was predictive to a greater odd of ischemic stroke (odds ratio, 1.276; 95% confidence interval, 1.082-1.504), with subjects in the highest quartile of MHR levels having a 1.6-fold higher risk of prevalent ischemic stroke (95% confidence interval, 1.045-2.524) as compared with those in the l…	odd	136139	0	1
31142341	2019	The severity of hypoxic-ischemic encephalopathy in infants is tightly associated with increased IL-1beta expression and astrocyte activation which was regulated by transient receptor potential vanilloid 1, a non-selective cation channel in the TRP family.	TRP	244247	1	0
31142345	2019	Co-treatment with acetate extract dose dependently adjusted DOX-prompted fluctuations in lipid profile, AST, ALP, ALT, total bilirubin, and direct bilirubin concentrations and hepatic weight.	ALP	109112	1	0
31142358	2019	OBJECTIVE: Scabies is an infection of the skin, which caused by human itch mite Sarcoptes scabiei.	itch	70 74	0	1
31142357	2019	BACKGROUND: Epithelial ovarian cancer typically spreads intra-abdominally, but preoperative evaluation with FDG PET/CT often reveals metabolically active supradiaphragmatic lymph nodes .	FDG	108111	0	1
31142406	2019	These form as a result of abberant development of embryonic lymph sac which is gradually filled with lymph fluid.1 They are commonly found in the head and neck region but can be present anywhere in the body.	sac	66 69	0	1
31142417	2019	It may be a de novo gene mutation or inherited as an autosomal dominant disorder having SKI gene and Fibrillin-1 gene mutations, located on chromosome 15q21.1.	SKI	88 91	1	0
31142422	2019	Her laboratory investigations revealed low cortisol level and high ACTH level, with inadequate response as well as short synacthen test (dynamic function test).	ACTH	67 71	1	0
31142423	2019	His laboratory investigations revealed normal serum cortisol and 17 Hydroxy (17 OH) progesterone levels with high plasma ACTH and renin levels.	ACTH	121125	1	0
31142423	2019	He had low aldosterone with inadequate response with hCG stimulation test.	hCG	53 56	1	0
31142433	2019	The studied evidence suggests that food resources were commonly abundant, but some water scarcity and increase in summer rains occurred during MIS 5e, when soils and C3 vegetation were eliminated, causing soil erosion.	MIS	143146	0	1
31142433	2019	Faunal resources remained abundant, and humans using the southern Levant corridor enjoyed also a favorable passage through the greening Sahara Desert during MIS 5e, which was crucial for human and faunal dispersion.	MIS	157160	0	1
31142433	2019	Qafzeh and Rantis caves' environmental records indicate xeric grassland-type ecosystem with Afro-Arabian elements that can be attributed to MIS 5e.	MIS	140143	0	1
31142433	2019	As the environmental conditions of MIS 5e were unique, faunal and isotopic records within this region can be used in the future as chronologic markers for MIS 5e.	MIS	35 38	0	1
31142433	2019	The extreme environmental event of MIS 5e was not repeated during the Holocene in terms of natural vegetation and fauna.	MIS	35 38	0	1
31142450	2019	MAIN OUTCOME MEASURE: Association between consumption of energy adjusted ultra-processed foods categorised into quarters (low, low-medium, medium-high, and high consumption) and all cause mortality, using multivariable Cox proportional hazard models.	Cox	219222	0	1
31142470	2019	ASM hydrolyzes sphingomyelins to produce ceramides but protein targets of ASM remain largely unclear.	ASM	0 3	1	0
31142470	2019	ASM hydrolyzes sphingomyelins to produce ceramides but protein targets of ASM remain largely unclear.	ASM	74 77	1	0
31142470	2019	Our mass-spectrometry-based proteomic analyses have identified >100 proteins associated with the ASM-dependent, detergent-resistant membrane microdomains (lipid rafts), with >60% of these proteins being palmitoylated, including SNAP23, Src-family kinases Yes and Lyn, and Ras and Rab family small GTPases.	Lyn	263266	1	0
31142470	2019	Our mass-spectrometry-based proteomic analyses have identified >100 proteins associated with the ASM-dependent, detergent-resistant membrane microdomains (lipid rafts), with >60% of these proteins being palmitoylated, including SNAP23, Src-family kinases Yes and Lyn, and Ras and Rab family small GTPases.	Rab	280283	1	0
31142470	2019	Inactivation of ASM abolished the presence of these proteins in the plasma membrane, with many of them trapped in the Golgi.	ASM	16 19	1	0
31142470	2019	While palmitoylation inhibitors and palmitoylation mutants phenocopied the effects of ASM inactivation, we demonstrated that ASM is required for the transport of palmitoylated proteins, such as SNAP23 and Lyn, from the Golgi to the plasma membrane without affecting palmitoylation directly.	ASM	86 89	1	0
31142470	2019	While palmitoylation inhibitors and palmitoylation mutants phenocopied the effects of ASM inactivation, we demonstrated that ASM is required for the transport of palmitoylated proteins, such as SNAP23 and Lyn, from the Golgi to the plasma membrane without affecting palmitoylation directly.	ASM	125128	1	0
31142470	2019	While palmitoylation inhibitors and palmitoylation mutants phenocopied the effects of ASM inactivation, we demonstrated that ASM is required for the transport of palmitoylated proteins, such as SNAP23 and Lyn, from the Golgi to the plasma membrane without affecting palmitoylation directly.	Lyn	205208	1	0
31142470	2019	Importantly, ASM delivered extracellularly can regulate the trafficking of SNAP23 from the Golgi to the plasma membrane.	ASM	13 16	1	0
31142470	2019	Our studies suggest that ASM, acting at the plasma membrane to produce ceramides, regulates the localization and trafficking of the palmitoylated proteins.	ASM	25 28	1	0
31142547	2019	A candidate screen to identify functionally redundant kinases uncovered genetic interactions of protein kinase d with Pkcdelta, sqa and Drak mutants, further supporting the role of protein kinase d in oxidative stress response, and suggesting its involvement in starvation induced autophagy and regulation of cytoskeletal dynamics.	sqa	128131	1	0
31142547	2019	A candidate screen to identify functionally redundant kinases uncovered genetic interactions of protein kinase d with Pkcdelta, sqa and Drak mutants, further supporting the role of protein kinase d in oxidative stress response, and suggesting its involvement in starvation induced autophagy and regulation of cytoskeletal dynamics.	Drak	136140	1	0
31142552	2019	Bivariate meta-analysis was performed using the mada procedure in R.	mada	48 52	0	1
31142552	2019	The basic life support and european resuscitation council TORR were more specific, which would lead to fewer futile transports, and all three of these termination of resuscitation rules had a miss rate of 0.13% (defined as a case where a patient is recommended for termination but survives).	miss	192196	0	1
31142552	2019	The pooled proportion of patients for whom each rule recommends TOR was much higher for the european resuscitation council and basic life support termination of resuscitation rules (93.5% and 74.8%, respectively) than for the advanced life support TORR (29.0%).	TOR	64 67	0	1
31142603	2019	Our data show that metformin increased IL-10 and IDO expression in Ad-hmesenchymal stem cells and decreased high-mobility group box 1 protein, IL-1beta, and IL-6 expression.	IDO	49 52	1	0
31142603	2019	In cocultures, metformin-stimulated Ad-hmesenchymal stem cells inhibited the mRNA expression of RUNX2, COL X, VEGF, MMP1, MMP3, and MMP13 in IL-1beta-stimulated osteoarthritis chondrocytes and increased the expression of TIMP1 and TIMP3.	COL	103106	1	0
31142603	2019	In cocultures, metformin-stimulated Ad-hmesenchymal stem cells inhibited the mRNA expression of RUNX2, COL X, VEGF, MMP1, MMP3, and MMP13 in IL-1beta-stimulated osteoarthritis chondrocytes and increased the expression of TIMP1 and TIMP3.	VEGF	110114	1	0
31142647	2019	Finally, we solved the structure of RU.521 bound in two alternate alignments to apo h-cGASCD, thereby occupying more of the catalytic pocket and providing insights into further optimization of active-site-binding inhibitors.	apo	80 83	0	1
31142650	2019	Some RNAs in Escherichia coli, yeast, and mammals were recently found to contain an NAD+ cap.	NAD+	84 88	1	0
31142682	2019	Detection of human epidermal growth factor receptor 2 overexpression in canine anal sac gland carcinoma.	sac	84 87	0	1
31142682	2019	Canine anal sac gland carcinoma frequently occurs in the apocrine glands of the canine anal sac and shows aggressive biological behavior.	sac	12 15	0	1
31142682	2019	Canine anal sac gland carcinoma frequently occurs in the apocrine glands of the canine anal sac and shows aggressive biological behavior.	sac	92 95	0	1
31142682	2019	In this study, HER2 expression in anal sac gland carcinoma was evaluated to investigate its potential as a therapeutic target for canine anal sac gland carcinoma.	sac	39 42	0	1
31142682	2019	In this study, HER2 expression in anal sac gland carcinoma was evaluated to investigate its potential as a therapeutic target for canine anal sac gland carcinoma.	sac	142145	0	1
31142682	2019	HER2 mRNA expression in surgically resected anal sac gland carcinoma tissues was significantly higher than that in normal anal sac tissue.	sac	49 52	0	1
31142682	2019	To evaluate the expression of HER2 protein, paraffin-embedded anal sac gland carcinoma tissues were immunohistochemically evaluated.	sac	67 70	0	1
31142682	2019	Strong and broad staining of HER2 was detected in anal sac gland carcinoma tissues, while HER2 was weakly to moderately stained in normal anal sac apocrine glands and squamous epithelia.	sac	55 58	0	1
31142682	2019	Strong and broad staining of HER2 was detected in anal sac gland carcinoma tissues, while HER2 was weakly to moderately stained in normal anal sac apocrine glands and squamous epithelia.	sac	143146	0	1
31142682	2019	The degree of HER2 expression in anal sac gland carcinoma tissues was scored based on its intensity and positivity (score: 0-3+).	sac	38 41	0	1
31142682	2019	In all, 80% of canine anal sac gland carcinoma tissues were positive for HER2 (scored 2+).	sac	27 30	0	1
31142682	2019	Furthermore, putative HER2-overexpressed cells in anal sac gland carcinoma were detected with trastuzumab by flow cytometry.	sac	55 58	0	1
31142682	2019	These preliminary data may lead to further evaluation of the role of HER2 in canine anal sac gland carcinoma as a mechanism of malignancy and as a therapeutic target for HER2-targeted therapy.	sac	89 92	0	1
31142701	2019	Meanwhile, QLQX elevated the Bcl-2 expression, declined the expressions of Bax, cytochrome c, apoptotic protease activating factor-1, cleaved-caspase 9 and cleaved-caspase 3, and up-regulated the ratios of phospho-AKT/AKT and phospho-glycogen synthase kinase-3beta /GSK3beta.	Bax	75 78	1	0
31142710	2019	However, we were unable to perform sufficient evaluation, since she could not open her mouth widely or push the tongue out beyond the lips.	lips	134138	0	1
31142886	2019	WEI nasal jet tube during monitored anaesthesia care for removal of oesophageal foreign body for a patient with fragile cardiopulmonary function.	jet	10 13	0	1
31142886	2019	WEI Nasal Jet Tube (WNJ) was used to sustain sufficient oxygenation without interfering with the gastroscopy operation.	Jet	10 13	0	1
31142959	2019	A PubMed and World Wide Web search was performed with the following key words: "ERAS ," "enhanced recovery after surgery," "PSH," "perioperative surgical home," "protocols," "outcomes." Articles found were published over a 20-year time range (1997-2017).	ERAS	80 84	0	1
31142986	2019	After 24 h, 100 mul of AgNPs (8-512-mug/ml concentrations) was added and incubated at 37 C for 24 h in 5% CO2 atmosphere.	mul	16 19	0	1
31142991	2019	Statistical Analysis Used: Cohen's weighted kappa (k) for inter-rater agreement was run using Graph Pad QuickCalcs.	Pad	100103	0	1
31142999	2019	This study evaluated the actual quantitative mean gain for various clinical (clinical attachment level [CAL], probing pocket depth and gingival marginal level ) and radiographic (intrabony defect depth [IBD]) parameters of Platelet Concentrates- PCs (PRP/PRF) as sole grafting material along with open flap debridement and open flap debridement alone in the treatment of intrabony defects.	CAL	104107	0	1
31142999	2019	This study evaluated the actual quantitative mean gain for various clinical (clinical attachment level [CAL], probing pocket depth and gingival marginal level ) and radiographic (intrabony defect depth [IBD]) parameters of Platelet Concentrates- PCs (PRP/PRF) as sole grafting material along with open flap debridement and open flap debridement alone in the treatment of intrabony defects.	PCs	246249	0	1
31142999	2019	Periodontal intrabony defects with radiographic IBD 3 mm with corresponding CAL 5 mm were included.	IBD	48 51	0	1
31142999	2019	Periodontal intrabony defects with radiographic IBD 3 mm with corresponding CAL 5 mm were included.	CAL	76 79	0	1
31142999	2019	Results: Actual quantitative mean gains were calculated for open flap debridement with PRF/platelet-rich plasma (CAL = 1.1 mm, IBD = 1.68 mm, probing pocket depth = 0.97 mm and gingival marginal level = 0.48 mm) over and above that of open flap debridement alone.	CAL	113116	0	1
31142999	2019	Results: Actual quantitative mean gains were calculated for open flap debridement with PRF/platelet-rich plasma (CAL = 1.1 mm, IBD = 1.68 mm, probing pocket depth = 0.97 mm and gingival marginal level = 0.48 mm) over and above that of open flap debridement alone.	IBD	127130	0	1
31143013	2019	Esthetic lip repositioning: A cosmetic approach for correction of gummy smile - A case series.	lip	9 12	0	1
31143013	2019	Lip repositioning can be employed as an alternative cosmetic treatment modality for the correction of an excessive gingival display with minimal risk or side effects.	Lip	0 3	0	1
31143016	2019	Settings and Design: Randomized control trial was made as interdisciplinary collaborative work between departments of Yoga Therapy, Pulmonary Medicine and Endocrinology, of MGMC & RI, Sri Balaji Vidyapeeth Puducherry.	Sri	184187	0	1
31143021	2019	CD4, CD8, CD4/CD8 ratio, and viral loads were studied.	CD4	0 3	1	0
31143021	2019	CD4, CD8, CD4/CD8 ratio, and viral loads were studied.	CD8	5 8	1	0
31143031	2019	Results: Apolipoprotein A5 Ser19Trp (P = 0.002), peroxisome proliferator-activated receptor-alpha L162V (P = 0.003), APOE APOE2/3/4 (P = 0.012), and APOE APOE2,3,4 (P = 0.025) show statistically significant differences between their haplotypes in plasma triglyceride levels.	APOE	117121	1	0
31143031	2019	Results: Apolipoprotein A5 Ser19Trp (P = 0.002), peroxisome proliferator-activated receptor-alpha L162V (P = 0.003), APOE APOE2/3/4 (P = 0.012), and APOE APOE2,3,4 (P = 0.025) show statistically significant differences between their haplotypes in plasma triglyceride levels.	APOE	149153	1	0
31143060	2019	This specialty is utilized for identification of individuals through visual, clinical, and radiographic interpretation of sound and caries involved teeth, eruption sequence of teeth, shedding sequence of teeth, tooth calcification and maturation, fracture of teeth, root canal therapy, type of restorations and dental crowns and bridges, pit and fissure sealants, appliances, oral and maxillofacial …	pit	338341	0	1
31143063	2019	Correlative study on lip prints, fingerprints, and mandibular intercanine distance for gender determination.	lip	21 24	0	1
31143063	2019	Aims: The aim of the present pilot study was to investigate the accuracy of various methods employed in gender determination such as lip prints, mandibular canine index, fingerprints, and correlation between them.	lip	133136	0	1
31143063	2019	Lip prints, fingerprints, and impressions of lower mandibular arches were collected.	Lip	0 3	0	1
31143063	2019	Statistical Analysis Used: The results were analyzed using Chi-square test for lip prints and fingerprints with an independent sample t-test for the mandibular canine index.	lip	79 82	0	1
31143063	2019	Results: Type II lip print pattern and loop pattern of fingerprints were the predominant patterns in both males and females, and mesiodistal width of right mandibular canine index has greater sexual dimorphism than left mandibular canine index.	lip	17 20	0	1
31143063	2019	Conclusions: Although lip prints, fingerprints, and mandibular canine index had their own specifications, correlation of the three parameters did not show any significance.	lip	22 25	0	1
31143066	2019	In 2013, a completely burned car was examined by forensic experts, containing charred, calcined human bones and teeth inside its trunk, thus an identity needed to be established.	car	29 32	0	1
31143069	2019	We are beginning to see its application in gene manipulation of sickle cell disease, human immunodeficiency virus resistant embryologic twin gene modification and inflammatory bowel disease genes such as Gatm (Glycine amidinotransferase, mitochondrial), nucleotide-binding oligomerization domain-containing protein 2, KRT12 and other genes implicated in adaptive immune convergence pathways have bee…	Gatm	204208	1	0
31143069	2019	Although, currently CRISPR does have its limitations due to limited number of specific Cas enzymes, off-target activity, protospacer adjacent motifs and crossfire between different target sites.	Cas	87 90	1	0
31143096	2019	Molecular Targets of Bis (7)-Cognitin and Its Relevance in Neurological Disorders: A Systematic Review.	Bis	21 24	1	0
31143096	2019	The effect of B7C on molecular targets, including AChE, BChE, BACE-1, NMDA receptor, GABA receptor, NOS, and Kv4.2 potassium channels was evaluated.	AChE	50 54	1	0
31143096	2019	The effect of B7C on molecular targets, including AChE, BChE, BACE-1, NMDA receptor, GABA receptor, NOS, and Kv4.2 potassium channels was evaluated.	BChE	56 60	1	0
31143096	2019	The effect of B7C on molecular targets, including AChE, BChE, BACE-1, NMDA receptor, GABA receptor, NOS, and Kv4.2 potassium channels was evaluated.	NOS	100103	1	0
31143100	2019	Differential Regulation of Syngap1 Translation by FMRP Modulates eEF2 Mediated Response on nmda receptor Activity.	FMRP	50 54	1	0
31143100	2019	Here, we report the reduced expression of a known translation regulator, FMRP, during a specific developmental period in Syngap1 -/+ mice.	FMRP	73 77	1	0
31143100	2019	Our results demonstrate that FMRP interacts with and regulates the translation of Syngap1 mRNA.	FMRP	29 33	1	0
31143100	2019	We further show reduced Fmr1 translation leads to decreased FMRP level during development in Syngap1 -/+ which results in an increase in Syngap1 translation.	FMRP	60 64	1	0
31143100	2019	In this study, we propose a cross-talk between FMRP and SYNGAP1 mediated signaling which can also explain the compensatory effect of impaired signaling observed in Syngap1 -/+ mice.	FMRP	47 51	1	0
31143105	2019	Cross-Generational Transmission of Early Life Stress Effects on HPA Regulators and Bdnf Are Mediated by Sex, Lineage, and Upbringing.	HPA	64 67	0	1
31143105	2019	Cross-Generational Transmission of Early Life Stress Effects on HPA Regulators and Bdnf Are Mediated by Sex, Lineage, and Upbringing.	Bdnf	83 87	1	0
31143105	2019	Although recent studies have focused on stress-induced epigenetic changes, the extent to which early life stress alters HPA axis function and stress responsivity across generations, whether these effects are sex-specific, and how lineage interacts with upbringing to impact these effects, remain unclear.	HPA	120123	0	1
31143105	2019	We hypothesized that early life stress would disrupt normative development in both generations, manifesting as altered methylation and expression of genes associated with stress signaling pathways (Nr3c1, Nr3c2, and Bdnf), blunted corticosterone, and anxiety-like behaviors.	Bdnf	216220	1	0
31143105	2019	Results suggest that direct exposure to early life stress leads to sex-specific effects on gene regulation and HPA functioning in adulthood, with maternal separation leading to increases in Bdnf methylation in both sexes, decreases in Bdnf expression in females, and decreases in Nr3c1 methylation in males, as well as blunted corticosterone and less anxiety-like behavior in females.	HPA	111114	0	1
31143105	2019	Results suggest that direct exposure to early life stress leads to sex-specific effects on gene regulation and HPA functioning in adulthood, with maternal separation leading to increases in Bdnf methylation in both sexes, decreases in Bdnf expression in females, and decreases in Nr3c1 methylation in males, as well as blunted corticosterone and less anxiety-like behavior in females.	Bdnf	190194	1	0
31143105	2019	Results suggest that direct exposure to early life stress leads to sex-specific effects on gene regulation and HPA functioning in adulthood, with maternal separation leading to increases in Bdnf methylation in both sexes, decreases in Bdnf expression in females, and decreases in Nr3c1 methylation in males, as well as blunted corticosterone and less anxiety-like behavior in females.	Bdnf	235239	1	0
31143105	2019	Across sex, early life stress lineage led to decreased methylation of Nr3c1, and increased methylation of Bdnf.	Bdnf	106110	1	0
31143105	2019	In fostered animals, upbringing by a previously stressed mother interacted with offspring lineage to impact methylation of Nr3c1 and Bdnf.	Bdnf	133137	1	0
31143109	2019	The patient also suffered from multiple squamous cell carcinomas of the scalp, face, lip, and ears, suggesting an UV carcinogenesis of merkel cell carcinoma.	lip	85 88	0	1
31143112	2019	Calcium Ions Stimulate the Hyperphosphorylation of Tau by Activating Microsomal Prostaglandin E Synthase 1.	Tau	51 54	1	0
31143112	2019	Alzheimer's disease is reportedly associated with the accumulation of calcium ions (Ca2+), and this accumulation is responsible for the phosphorylation of tau.	tau	155158	1	0
31143112	2019	Using APP/PS1 Tg mice and neuroblastoma (N)2a cells as in vivo and in vitro experimental models, we observed that Ca2+ stimulated the phosphorylation of tau by activating microsomal PGE synthase 1 in a prostaglandin E2-dependent EP receptor-activating manner.	tau	153156	1	0
31143112	2019	Elevated levels of PGE2 were responsible for the hyperphosphorylation of tau in an EP-1-, EP-2-, and EP-3-dependent but not EP4-dependent cyclin-dependent kinase 5-activating manner.	tau	73 76	1	0
31143112	2019	Reciprocally, the knockdown of the expression of microsomal pge synthase 1 ameliorated the expected cognitive decline by inhibiting the phosphorylation of tau in APP/PS1 Tg mice.	tau	155158	1	0
31143112	2019	Moreover, CDK5 was found to be located downstream of EP1-3 to regulate the phosphorylation of tau though the cleavage of p35 to p25.	tau	94 97	1	0
31143112	2019	Moreover, CDK5 was found to be located downstream of EP1-3 to regulate the phosphorylation of tau though the cleavage of p35 to p25.	p35	121124	1	0
31143112	2019	Moreover, CDK5 was found to be located downstream of EP1-3 to regulate the phosphorylation of tau though the cleavage of p35 to p25.	p25	128131	1	0
31143112	2019	Finally, the phosphorylation of tau by Ca2+ contributed to the cognitive decline of APP/PS1 Tg mice.	tau	32 35	1	0
31143113	2019	The canonical endocannabinoid system consists of the endocannabinoids N-arachidonoylethanolamine (anandamide) and 2-arachidonoylglycerol as well as the Gi/o protein-coupled transmembrane cannabinoid receptors CB1 and CB2.	CB2	217220	1	0
31143116	2019	Investigations into the mechanism of action showed that lavender essential oil markedly decreased the phosphorylation of ERK1, ERK2, and JNK1, and decreased the levels of iNOS in the spinal cord;	iNOS	171175	1	0
31143116	2019	Involvement of the endocannabinoid system was also detected using in vitro inhibition of the FAAH and MALG enzymes as well as in vivo experiments with the CB1 antagonist.	FAAH	93 97	1	0
31143116	2019	Involvement of the endocannabinoid system was also detected using in vitro inhibition of the FAAH and MALG enzymes as well as in vivo experiments with the CB1 antagonist.	CB1	155158	1	0
31143119	2019	In addition, all-trans-retinoic acid dose-dependently reduced the phosphorylation levels of mTOR and mTOR target proteins p70 S6 kinase and 4E-binding protein 1 in A7r5 and HASMC.	mTOR	92 96	1	0
31143119	2019	In addition, all-trans-retinoic acid dose-dependently reduced the phosphorylation levels of mTOR and mTOR target proteins p70 S6 kinase and 4E-binding protein 1 in A7r5 and HASMC.	mTOR	101105	1	0
31143119	2019	In addition, all-trans-retinoic acid dose-dependently reduced the phosphorylation levels of mTOR and mTOR target proteins p70 S6 kinase and 4E-binding protein 1 in A7r5 and HASMC.	p70	122125	1	0
31143130	2019	Duplex CRISPR/Cas9 technology efficiently removed whole exons of CRY genes by using two guide RNAs targeting exon-flanking intron regions of human osteosarcoma cells (U-2 OS).	CRY	65 68	1	0
31143130	2019	Resulting cell clones did not express CRY proteins and showed short period, low-amplitude rhythms (for CRY1 knockout), long period rhythms (for CRY2 knockout) or were arrhythmic (for CRY1/CRY2 double knockout) similar to circadian phenotypes of cells derived from classical knockout mouse models.	CRY	38 41	1	0
31143149	2019	However, there is little research on how FSP is related to homework involvement.	FSP	41 44	0	1
31143149	2019	The aim of the present study is to examine the link between an effective family-school communication - as one aspect of FSP - and the quality of parental homework involvement in the German context.	FSP	120123	0	1
31143156	2019	Methods: From our own clinical practice, we describe the first known case of Creutzfeldt-Jakob Disease (CJD, Heidenhain variant) that presented with symptoms of alice in wonderland syndrome.	CJD	104107	0	1
31143156	2019	Conclusion: We conclude that alice in wonderland syndrome is not always as harmless as sometimes suggested, and that CJD, although extremely rare, must be part of its extensive differential diagnosis, notably in the presence of rapid cognitive decline.	CJD	117120	0	1
31143204	2019	In the light of that, in the present article, it has been investigated through the comparison of different electroencephalographic (EEG) indices a typical item known to be able of influencing PSA perception, that is gender.	PSA	192195	0	1
31143204	2019	The ME and the frontal theta also evidenced a statistically significant interaction between the kind of the PSA and the gender of the observers;	PSA	108111	0	1
31143204	2019	Specifically, women showed higher ME and frontal theta activity for the male character PSA.	PSA	87 90	0	1
31143210	2019	Conclusions: Our results demonstrate that curcumin showed an obvious protective effect on PDS-induced epithelial-mesenchymal transition of HMrSV5 cells and suggest implication of the TAK1, p38 and JNK pathway in mediating the effects of curcumin in epithelial-mesenchymal transition of MCs.	p38	189192	1	0
31143210	2019	Conclusions: Our results demonstrate that curcumin showed an obvious protective effect on PDS-induced epithelial-mesenchymal transition of HMrSV5 cells and suggest implication of the TAK1, p38 and JNK pathway in mediating the effects of curcumin in epithelial-mesenchymal transition of MCs.	MCs	286289	0	1
31143231	2019	Furthermore, p53 status was only prognostic factor for 5-year overall survival whereas higher stages of disease and p53 status were prognostic factors for 5-year disease-free survival.	p53	13 16	1	0
31143231	2019	Furthermore, p53 status was only prognostic factor for 5-year overall survival whereas higher stages of disease and p53 status were prognostic factors for 5-year disease-free survival.	p53	116119	1	0
31143270	2019	The aim of this study was to retrospectively evaluate the patients admitted to our neonatal intensive care unit because of NTD.	NTD	123126	0	1
31143270	2019	Materials and Methods: We retrospectively examined the demographic features, familial risk factors, physical examination and radiological findings, and accompanying diseases of 69 patients with NTD.	NTD	194197	0	1
31143270	2019	The median time of making a diagnosis of NTD by prenatal ultrasonography was 20 (16-24) weeks.	NTD	41 44	0	1
31143270	2019	Conclusion: The use of periconceptional folic acid in mothers and a decision for termination in selected cases may be effective in reducing the frequency of NTD.	NTD	157160	0	1
31143282	2019	CMs related to developmental venous anomalies tend to have more aggressive behavior than isolated cavernous malformation.	CMs	0 3	0	1
31143282	2019	In cases of developmental venous anomalies associated with hemorrhage, CMs are most often the site of bleeding rather than developmental venous anomalies themselves.	CMs	71 74	0	1
31143292	2019	The first-choice treatment is to surgically remove as much of the SFT as possible;	SFT	66 69	0	1
31143292	2019	The tumor was diagnosed histologically as SFT and has not recurred for 8 months since surgery.	SFT	42 45	0	1
31143292	2019	Preoperative intravascular embolization of branches of the ophthalmic artery can be performed safely, resulting in excellent control of intraoperative bleeding and facilitating complete removal of SFT without additional complications.	SFT	197200	0	1
31143299	2019	A total of 25 herbs and spices were initially chosen, including anise, basil, black pepper, caraway, chili pepper, cinnamon, clove, cumin, curcumin, dill, fennel, fenugreek, ginger, lemongrass, marjoram, nutmeg, oregano, parsley, peppermint and spearmint, rosemary, saffron, sage, tarragon, and thyme.	sage	275279	0	1
31143305	2019	Methods: Disease activity and functional impairment were quantified in 50 axspondylarthritis patients by using standardized parameters (Bath ankylosing spondylitis disease activity index (BASDAI), C-reactive protein, finger-floor distance and Ott' sign).	Ott	243246	0	1
31143305	2019	Follow-up analysis (33 months later) did not show any differences in gender, colony formation, CD133+/KDR+ cells or serum levels of vasomodulatory mediators if related to the categories of BASDAI, Ott' sign or finger-floor distance.	Ott	197200	0	1
31143309	2019	Missense mutations result in homozygosity or heterozygosity for substitutions in the HFE gene, with the most common being C282Y and H63D.	HFE	85 88	1	0
31143309	2019	Methods: With an aim to evaluate an association between polycythemia and hereditary hemochromatosis, retrospective chart review was performed for 152 patients with known HFE mutations.	HFE	170173	1	0
31143309	2019	Parameters reviewed included individual HFE genotypes, gender distribution, hemoglobin and hematocrit levels, median ferritin levels and whether or not phlebotomy was required.	HFE	40 43	1	0
31143309	2019	Median hemoglobin and hematocrit were noted to be higher in men compared to women irrespective of HFE status.	HFE	98101	1	0
31143309	2019	Regarding HFE mutation, 44 (28.9%) patients were C282Y/C282Y, 10 (6.6%) were H63D/H63D and 27 (17.8%) had one copy of each mutation.	HFE	10 13	1	0
31143309	2019	Additional studies need to be pursued to explore the association between HFE mutations and secondary polycythemia.	HFE	73 76	1	0
31143314	2019	Without an iterative approach, the positive screening rate was expected to dip below the 20% measured in the first cycle;	dip	75 78	0	1
31143333	2019	Methods: A community and health facility based interventional study involving integration of immunization into nutrition services in two Outpatient Therapeutic Programcenters in Bentiu PoC between January-December 2017.	PoC	185188	0	1
31143333	2019	Results: Integration of immunization into the nutrition services through the outpatient therapeutic program centres increased the number of children immunized with various antigens and the dropout rate was much lower and statistically significant among children who received immunization at the outpatient therapeutic program centers than those in the Primary Health Care Centers (PHC Centers) in th…	PHC	381384	0	1
31143333	2019	Children who were vaccinated at the outpatient therapeutic program centre in sector 2 were 45% less likely to miss vaccination than those vaccinated at the PHCC (OR: 0.45; 95%CI:0.36- 0.55), p<0.05 while those vaccinated at the outpatient therapeutic program sector in sector 5 were 27% less likely to miss vaccination than those vaccinated at the PHCC (OR: 0.27; 95%CI: 0.20 -0.35) p<0.05).	miss	110114	0	1
31143333	2019	Children who were vaccinated at the outpatient therapeutic program centre in sector 2 were 45% less likely to miss vaccination than those vaccinated at the PHCC (OR: 0.45; 95%CI:0.36- 0.55), p<0.05 while those vaccinated at the outpatient therapeutic program sector in sector 5 were 27% less likely to miss vaccination than those vaccinated at the PHCC (OR: 0.27; 95%CI: 0.20 -0.35) p<0.05).	miss	302306	0	1
31143338	2019	A Bogot bag was used for temporary abdominal content containment.	bag	8 11	0	1
31143353	2019	In this respect, we here report a case whose data were collected in the Department of Visceral Surgery at the University Hospital Hassan II in Fez.	Fez	143146	0	1
31143355	2019	The levels of FSH and LH were normal.	FSH	14 17	1	0
31143379	2019	The median follow-up periods of ASD was 15 months.	ASD	32 35	0	1
31143379	2019	Results: The mean ASD and device size were 13.5 2.3 and 14.3 3.2 mm, respectively.	ASD	18 21	0	1
31143410	2019	Four alternative confirmatory factor analysis models were tested using data from participants who reported at least one adverse childhood experience (ACE; N = 314).	ACE	150153	0	1
31143410	2019	The six international trauma questionnaire symptoms clusters were all significantly correlated with anxiety, depression, and the number of ACEs.	ACEs	139143	0	1
31143428	2019	Data analyses involved survival analysis using Kaplan-Meier analysis, log-rank test, and multivariate Cox regression modeling.	Cox	102105	0	1
31143436	2019	Based on dopamine receptor d3 gene Ser9Gly polymorphism, parkinson's disease patients and HCs were divided into four subgroups.	HCs	90 93	0	1
31143446	2019	Results: The mean age of the participants was 65.9 ( 8.9) years, the mean SBP and DBP were 136.5 ( 13.3) and 87.9 ( 9.1) respectively.	SBP	74 77	0	1
31143446	2019	Results: The mean age of the participants was 65.9 ( 8.9) years, the mean SBP and DBP were 136.5 ( 13.3) and 87.9 ( 9.1) respectively.	DBP	82 85	0	1
31143447	2019	Cases presentation: 1st case: After 18 months of infertility of the couple, explorations showed a high level of ACTH on the hormonal biological analysis.	ACTH	112116	1	0
31143458	2019	Food and Drug Administration or CMS regulation;	CMS	32 35	0	1
31143464	2019	Playing to live: outcome evaluation of a community-based psychosocial expressive arts program for children during the Liberian Ebola epidemic.	arts	81 85	0	1
31143464	2019	Background: This paper reviews the efficacy of a community psychosocial arts program focused on building mental health capacity within post-Ebola Liberia.	arts	72 76	0	1
31143470	2019	We also used an inhibitor of VEGFR (PTK787) to explore the mechanistic role of VEGF in MG-induced pathogenesis.	VEGF	79 83	1	0
31143476	2019	And elevated uric acid, homocysteine, and apoB had higher chances of presenting increased hs-c-reactive protein (P < 0.05).	apoB	42 46	1	0
31143478	2019	Background: To study the expression and clinical significance of long noncoding RNA- (lncRNA-) MIAT in patients with coronary atherosclerotic heart disease (CAD).	MIAT	95 99	1	0
31143478	2019	Methods: Serum MIAT, interleukin-6, and tumor necrosis factor-alpha in 106 CAD patients and 89 healthy donors were detected.	MIAT	15 19	1	0
31143478	2019	Correlations between serum MIAT and serum interleukin-6 and tumor necrosis factor-alpha were analyzed.	MIAT	27 31	1	0
31143478	2019	Serum MIAT was positively correlated with serum interleukin-6 and tumor necrosis factor-alpha in CAD.	MIAT	6 10	1	0
31143478	2019	Multivariate analysis found that hypertension (OR (95% CI) = 3.471 (2.180-4.091), P=0.011), diabetes (OR (95% CI) = 3.682 (1.698-4.897), P=0.003), HDL-C (OR (95% CI) = 3.372 (1.760-6.920), P=0.001), and serum MIAT expression (OR (95% CI) = 2.687 (1.683-7.468), P=0.001) were independent risk factors for CAD.	MIAT	209213	1	0
31143482	2019	A diagnosis of spinal epidural abscess should be considered in patients presenting with progressive weakness and neurological deficits following UTI and is to be confirmed by MRI.	UTI	145148	0	1
31143490	2019	Angiography is mapped at OCT resolution by flow detection at every pixel with en-face projection from the volume between nerve fiber layer and retinal pigment epithelium.	OCT	25 28	0	1
31143494	2019	We report a novel design and operation of a highly integrated miniature handheld OCT probe, with high-speed angiography function that can be used in clinical settings for young children and infants, providing rapid, non-invasive structural and angiographic imaging of the retina and choroid.	OCT	81 84	0	1
31143494	2019	The imaging system is operated at 200 kHz, with 3D OCT and OCTA scan time of 0.8 and 3.2 seconds, respectively, and the scanning angle on the pupil is 36 , covering the full perifoveal region.	OCT	51 54	0	1
31143494	2019	Compared to conventional OCT systems, the high-speed hand-held OCT system significantly improves the operator's experience and scanning efficiency, which is important for imaging infants.	OCT	25 28	0	1
31143494	2019	Compared to conventional OCT systems, the high-speed hand-held OCT system significantly improves the operator's experience and scanning efficiency, which is important for imaging infants.	OCT	63 66	0	1
31143505	2019	A ubiquitous soft component is reported for the first time, characterized by a longitudinal modulus of about 4.3 GPa, possibly related to the amorphous phase of the bone.	GPa	113116	0	1
31143505	2019	This phase is mixed, at micrometric scales, with a harder component, ascribed to mineralized collagen fibrils, characterized by a longitudinal modulus ranging between 16 and 25 GPa.	GPa	177180	0	1
31143506	2019	OCT angiography is a functional extension of OCT that allows for non-invasive imaging of retinal microvasculature.	OCT	45 48	0	1
31143506	2019	Unlike most handheld OCT probes, which are designed to be held by the side of the case or by a handle, the new probe was optimized for ergonomics of supine imaging where imagers prefer to hold the probe by the lens tube.	OCT	21 24	0	1
31143506	2019	The probe supports high-speed imaging using a 200 kHz swept source OCT engine, has a motorized stage that provides + 10 to -10 D refractive error correction and weighs 700g.	OCT	67 70	0	1
31143508	2019	The mAb Foxp3-#32 selectively recognizes CD4 + CD25 + CD127low and Foxp3 + Tregs also expressing HLA-A*02:01 and depletes these cells via antibody-mediated cellular cytotoxicity.	CD4	41 44	1	0
31143511	2019	Kit-dependent mast cells and their transcriptional signature were significantly enriched in human lung adenocarcinoma compared to adjacent normal tissue, especially in the subset of patients with KRAS mutations.	KRAS	196200	1	0
31143512	2019	Impaired circulating myeloid CD1c+ dendritic cell function in human glioblastoma is restored by p38 inhibition - implications for the next generation of dendritic cells vaccines.	p38	96 99	1	0
31143512	2019	Inhibition of p38 restored the IL-12:IL-10 balance in dexamethasone or tumor lysate-conditioned healthy circulating dendritic cell and enhanced T-cell proliferation and interferon-gamma production.	p38	14 17	1	0
31143512	2019	We will therefore shortly embark on a clinical trial of adoptively transferred, p38 MAPK-inhibited circulating dendritic cell in adults with glioblastoma.	p38	80 83	1	0
31143518	2019	Indeed, administration of a neutralizing mAb to human ICOS reduced Treg proportions and numbers and improved CD4 + T cell proliferation in humanized mice.	ICOS	54 58	1	0
31143518	2019	Indeed, administration of a neutralizing mAb to human ICOS reduced Treg proportions and numbers and improved CD4 + T cell proliferation in humanized mice.	CD4	109112	1	0
31143518	2019	Moreover, a combination of the anti-ICOS mAb with cyclophosphamide reduced tumor growth, and that was associated with an improved CD8 to Treg ratio.	CD8	130133	1	0
31143518	2019	One sentence summary: Targeting ICOS in combination with chemotherapy is a promising strategy to improve tumor immunity in humans.	ICOS	32 36	1	0
31143552	2019	Conclusions: Music interventions may decrease anxiety scores and physiological indexes related to anxiety (HR, systolic blood pressure, and DBP).	DBP	140143	0	1
31143626	2019	Aim: The aim of this study is to compare demographic characteristics, operative data, and complication rates of women who underwent total laparoscopic hysterectomy by the skeleton uterus technique (Skeleton-TLH) with those of women who underwent TLH by the standard technique in a university teaching and research hospital.	TLH	246249	0	1
31143626	2019	Conclusion: TLH with the skeleton uterus technique is feasible and safe, especially for advanced pelvic surgeons.	TLH	12 15	0	1
31143650	2019	High-grade HCCs showed significantly higher MK values (0.93 0.10 vs. 0.82 0.09, P<0.001), along with MD (1.34 0.18 vs. 1.54 0.22, P<0.001) and apparent diffusion coefficient values (1.17 0.15 vs. 1.30 0.16, P=0.001) than low-grade HCCs.	HCCs	11 15	0	1
31143650	2019	High-grade HCCs showed significantly higher MK values (0.93 0.10 vs. 0.82 0.09, P<0.001), along with MD (1.34 0.18 vs. 1.54 0.22, P<0.001) and apparent diffusion coefficient values (1.17 0.15 vs. 1.30 0.16, P=0.001) than low-grade HCCs.	HCCs	231235	0	1
31143650	2019	For differentiating high-grade from low-grade HCCs, MK demonstrated a higher area under the receiver operating characteristics curve (AUC) and significantly higher specificity than MD and apparent diffusion coefficient (AUC =0.81 vs. 0.76 and 0.74; specificity =82.2% vs. 60.0% and 60.0%, P=0.02).	HCCs	46 50	0	1
31143654	2019	Mean radiation dose of the entire study group was 22.45 mSv and those to normal patients was 21.19 mSv.	mSv	56 59	0	1
31143654	2019	Mean radiation dose of the entire study group was 22.45 mSv and those to normal patients was 21.19 mSv.	mSv	99102	0	1
31143671	2019	Serum cytokines leptin, CCL5, and VEGF concentrations showed a decrease in the hormone-treated rats compared to placebo-treated rats.	VEGF	34 38	1	0
31143692	2019	Objective: The purpose of this study was to investigate the protective and therapeutic effects of aqueous extract of P. atlantica gum on an experimental asthma in BALB/c mice.	gum	130133	0	1
31143692	2019	Materials and Methods: Aqueous extract of dried and milled P. atlantica gum was assemble and evaluate by GC-MS.	gum	72 75	0	1
31143692	2019	In order to investigate the effect of P. atlantica gum extract on cellular and pathological aspects of asthma, 60 BALB/c mice were divided into six groups as: negative control, asthmatic group, asthmatic group receiving dexamethasone (1mg/kg; intraperitoneal (IP)) and three asthmatic groups receiving different concentrations of the extract (100, 200 and 400 mg/kg, orally) from the beginning of th…	gum	51 54	0	1
31143692	2019	Results: Regardless of the dose, aqueous extract of P. atlantica gum, caused significant decrease in the number of BALF eosinophilic cells and levels of anti-ovalbumin IgE, IL-4, IL-5 and IL-17 cytokine levels, as well as pathologic damage of the lung tissue.	gum	65 68	0	1
31143692	2019	Conclusion: The aqueous extract of P. atlantica gum can be considered as a potent anti-inflammatory and immunomodulatory compound and may be used as a natural compound for treatment of immune system disorders.	gum	48 51	0	1
31143698	2019	Fluorescence in situ hybridization for the most commonly seen abnormalities (5/5q, -7/7q, +8, and -20/20q-) is routinely performed alongside conventional cytogenetics in the evaluation of suspected MDS despite conflicting reports of its relative contribution compared to conventional cytogenetics alone.	MDS	198201	0	1
31143698	2019	Objectives: To assess the additional diagnostic and prognostic value of performing concurrent fluorescence in situ hybridization versus conventional cytogenetics alone in cases of suspected MDS.	MDS	190193	0	1
31143698	2019	Materials and Methods: A total of 127 bone marrow samples submitted to our cytogenetic laboratory with a presumptive diagnosis of MDS were evaluated by concurrent conventional cytogenetics and an MDS fluorescence in situ hybridization panel.	MDS	130133	0	1
31143698	2019	Therefore, fluorescence in situ hybridization testing is best reserved for suspected MDS cases lacking sufficient metaphases.	MDS	85 88	0	1
31143704	2019	Further in vivo studies on TC1 tumors developing in mice indicated that treatment with either resveratrol or pterostilbene can significantly inhibit tumor development, with both compounds capable of downregulating E6 and VEGF tumor protein levels.	TC1	27 30	0	1
31143704	2019	Further in vivo studies on TC1 tumors developing in mice indicated that treatment with either resveratrol or pterostilbene can significantly inhibit tumor development, with both compounds capable of downregulating E6 and VEGF tumor protein levels.	VEGF	221225	1	0
31143704	2019	Interestingly, the decrease in tumor size in pterostilbene was associated with tumor cell apoptosis, as indicated by an upregulation of activated caspase-3 whereas in resveratrol-treated mice it was accompanied by arrest of cell cycle, as indicated by a downregulation of PCNA.	PCNA	272276	1	0
31143705	2019	Fat mass and obesity-associated protein (FTO) functions as an eraser of the RNA m6A modification, but its roles in intrahepatic cholangiocarcinoma tumorigenesis and development remain unknown.	m6A	80 83	0	1
31143705	2019	We showed here that the protein level of FTO was downregulated in clinical intrahepatic cholangiocarcinoma samples and cell lines and that FTO expression was inversely correlated with the expression of CA19-9 and micro-vessel density .	FTO	41 44	1	0
31143705	2019	We showed here that the protein level of FTO was downregulated in clinical intrahepatic cholangiocarcinoma samples and cell lines and that FTO expression was inversely correlated with the expression of CA19-9 and micro-vessel density .	FTO	139142	1	0
31143705	2019	A Kaplan-Meier survival analysis showed that a low expression of FTO predicted poor prognosis in intrahepatic cholangiocarcinoma. in vitro, decreased endogenous expression of FTO obviously reduced apoptosis of intrahepatic cholangiocarcinoma cells.	FTO	65 68	1	0
31143705	2019	A Kaplan-Meier survival analysis showed that a low expression of FTO predicted poor prognosis in intrahepatic cholangiocarcinoma. in vitro, decreased endogenous expression of FTO obviously reduced apoptosis of intrahepatic cholangiocarcinoma cells.	FTO	175178	1	0
31143705	2019	Moreover, FTO suppressed the anchorage-independent growth and mobility of intrahepatic cholangiocarcinoma cells.	FTO	10 13	1	0
31143705	2019	Through mining the database, FTO was found to regulate the integrin signaling pathway, inflammation signaling pathway, epidermal growth factor receptor signaling pathway, angiogenesis, and the pyrimidine metabolism pathway.	FTO	29 32	1	0
31143705	2019	RNA decay assay showed that oncogene TEAD2 mRNA stability was impaired by FTO.	FTO	74 77	1	0
31143705	2019	In addition, the overexpression of FTO suppressed tumor growth in vivo.	FTO	35 38	1	0
31143705	2019	In conclusion, our study demonstrated the critical roles of FTO in intrahepatic cholangiocarcinoma.	FTO	60 63	1	0
31143721	2019	Analysis was done with Epi Info 7 software with level of significance set at P < 0.05.	Epi	23 26	0	1
31143725	2019	Results: The tuberculosis (all forms) CNR increased in 2016 followed by a drop to 2015 levels in 2017.	CNR	38 41	0	1
31143728	2019	Privacy is a concern in public toilet, uses of sanitary pad was also less and changing of absorbent material in toilets was also a matter of concern for the girls.	pad	56 59	0	1
31143736	2019	Amid revealing participants that our tap water is safe and that fluorine can prevent dental caries, 33% of parents would you use tap water due to its fluoride content.	Amid	0 4	0	1
31143742	2019	Interestingly, only 1 in 2 parents thought their children were safe while riding with them in the car.	car	98101	0	1
31143742	2019	Moreover, only 47% of parents always used car seats, seatbelts, and proper restraints.	car	42 45	0	1
31143746	2019	An interesting case report of acute renal failure due to wasp bite.	wasp	57 61	0	1
31143746	2019	Wasp bite usually presents with local complications.	Wasp	0 4	0	1
31143764	2019	Seasonal Clock Changes Are Underappreciated Health Risks-Also in IBD?	IBD	65 68	0	1
31143772	2019	During this study, the ethanolic D. viscosa extract, ointments containing 2.5% and 5% of D. viscosa extract, and the vehiculum were assessed for their total phenol content, caffeoylquinic acid content (CQC), and antioxidant activities using complementary methods (TAC, the DPPH, ABTS, FRAP, and the BCB).	FRAP	285289	0	1
31143813	2019	The overall LOS standard different between groups (kangaroo mother care vs. CNC) was - 0.91 days (95% confidence interval, -2.14-0.32, Q = 25.6, df = 10, P = 0.004, I 2 = 60.98).	CNC	76 79	0	1
31143855	2019	For those screened positive on ADAM questionnaire underwent biochemical evaluation for serum total testosterone, luteinizing hormone, and CD4 count.	CD4	138141	1	0
31143855	2019	Pearson's correlation coefficient was used to assess any relationship between CD4 count, luteinizing hormone, and testosterone.	CD4	78 81	1	0
31143855	2019	The mean duration of antiretroviral therapy was 6.13 years and the mean CD4 count was 442.63 cells/mm3.	CD4	72 75	1	0
31143855	2019	There was significant association between hypogonadism and CD4 count, but no association was found with body mass index and duration of antiretroviral therapy.	CD4	59 62	1	0
31143855	2019	There was significant association of hypogonadism with lower CD4 count.	CD4	61 64	1	0
31143856	2019	Gender, CD4 count, tuberculosis contact, prior tuberculosis, and ART status did not have any effect on the development of tuberculosis.	CD4	8 11	1	0
31143859	2019	Results: Age, sex, date of initial diagnosis, date, and type of first line and second line regimens were documented, CD4 count, and plasma viral load at the time of initiation and after 3 and 6 months were recorded.	CD4	117120	1	0
31143861	2019	In our antiretroviral therapy Plus Centre, CD4 count has been done at the start and after 6 months of second-line antiretroviral therapy which were recorded as effectiveness indicator of second-line antiretroviral therapy.	CD4	43 46	1	0
31143861	2019	The mean increase in CD4 count of 106.09 cells/mm3 was observed after 6 months of second-line antiretroviral therapy in 63 patients.	CD4	21 24	1	0
31143861	2019	The mean increase in CD4 count (57.16%) after 6 months was statistically significant (P < 0.05) with tenofovir + lamivudine + atazanavir/ritonavir regimen in forty patients.	CD4	21 24	1	0
31143861	2019	On the other hand, the National AIDS Control Organization-sponsored second-line antiretroviral therapy was found to be effective as 84.12% of patients had improvement in their mean CD4 count.	CD4	181184	1	0
31143877	2019	Adjusted odd ratios for neonatal and childhood outcomes were calculated controlling for GA, birth weight, sex, and magnesium exposure.	odd	9 12	0	1
31143877	2019	Foetal ability to respond to inflammation by haptoglobinemia resulted in adjusted odd ratios similar to inflammation-nonexposed newborns.	odd	82 85	0	1
31143889	2019	It is known that bile acid plays a role in regulating cholesterol homeostasis and the digestion of fats in the human body.	fats	99103	0	1
31143889	2019	In addition, the expression of chondrogenic marker genes (SOX9, COL2, and ACAN), proteins (SOX9 and COL2), and glycosaminoglycan (Chondroitin sulfate) was much higher in the TUDCA-treated group compared to the controls.	ACAN	74 78	1	0
31143920	2019	The miRNA-17 assay was tested at concentrations of 1 pM to 1 nM in both PBS and a representative complex biological sample.	PBS	72 75	0	1
31143974	2019	It is now important to continue evaluating the clinical and socioeconomic benefit of these, at first glance expensive, preclinical tools and also continue analyzing special regional aspects as well as the pros and cons of the concepts.	pros	205209	0	1
31143985	2019	After visfatin treatment, the expression of pro-apoptotic genes Bax, Bik, and p53 decreased and the expression of anti-apoptotic genes Bcl-2 and Bcl-xl increased, and expression of autophagy factors LC3 and Beclin1 decreased, indicating that visfatin inhibits apoptosis and reduces autophagy.	Bax	64 67	1	0
31143985	2019	After visfatin treatment, the expression of pro-apoptotic genes Bax, Bik, and p53 decreased and the expression of anti-apoptotic genes Bcl-2 and Bcl-xl increased, and expression of autophagy factors LC3 and Beclin1 decreased, indicating that visfatin inhibits apoptosis and reduces autophagy.	Bik	69 72	1	0
31143985	2019	After visfatin treatment, the expression of pro-apoptotic genes Bax, Bik, and p53 decreased and the expression of anti-apoptotic genes Bcl-2 and Bcl-xl increased, and expression of autophagy factors LC3 and Beclin1 decreased, indicating that visfatin inhibits apoptosis and reduces autophagy.	p53	78 81	1	0
31143985	2019	After visfatin treatment, the expression of pro-apoptotic genes Bax, Bik, and p53 decreased and the expression of anti-apoptotic genes Bcl-2 and Bcl-xl increased, and expression of autophagy factors LC3 and Beclin1 decreased, indicating that visfatin inhibits apoptosis and reduces autophagy.	LC3	199202	1	0
31143990	2019	Radius and tibia bone were assessed via peripheral quantitative computed tomography (Stratec XCT 2000) at the 66% site relative to the distal growth plate.	XCT	93 96	0	1
31143995	2019	METHODS: Liquid fiducial markers with a volume of 20-100 mul were injected into freshly resected pancreas specimens of three patients with suspected adenocarcinoma.	mul	57 60	0	1
31143995	2019	RESULTS: Markers with a volume 20 mul were detected as hyperintensity on X ray and computed tomography.	mul	34 37	0	1
31143995	2019	On T1- and T2-weighted 3T magnetic resonance imaging, marker sizes ranging from 20-100 mul were visible as hypointensity.	mul	87 90	0	1
31143995	2019	A marker volume of 50 muL is recommended in clinically used magnetic resonance imaging sequences.	muL	22 25	0	1
31144007	2019	BACKGROUND: Mastectomy is performed in female-to-male transsexual (FTM TS) patients as a surgical treatment to make a female thorax resemble a male thorax;	FTM	67 70	0	1
31144007	2019	However, no studies have examined the nipple-areolar complex position in FTM TS patients after mastectomy.	FTM	73 76	0	1
31144007	2019	PATIENTS AND METHODS: The nipple-areolar complex position in 41 FTM TS patients before and after non-skin-excisional mastectomy was examined and compared with that in 50 age- and BMI-matched biologically male subjects as controls.	FTM	64 67	0	1
31144007	2019	RESULTS AND CONCLUSIONS: After non-skin-excisional mastectomy, the nipple-areolar complex in the FTM TS patients was positioned significantly more medially (horizontal nipple-areolar complex position ratio {('internipple distance'/'width of thorax') 100} [HNPR]: preoperatively, 70.07% 4.19%;	FTM	97100	0	1
31144007	2019	Postoperatively, the nipple-areolar complex in the FTM TS patients was located significantly more medially than that in the control subjects (HNPR: 63.28% 3.79% to 66.79% 4.82%), although the height of the nipple-areolar complex was the same.	FTM	51 54	0	1
31144007	2019	Laterally deviated eccentric circular type mastectomy may be a good option for FTM TS patients who have moderately sized breasts with such features.	FTM	79 82	0	1
31144027	2019	The CA2 sector was most frequently affected in the FTLD/ALS-C9 group, whereas the CA1/subiculum was the most vulnerable area in the other groups.	CA2	4 7	0	1
31144037	2019	We then ran statistical models to relate cortisol concentrations with landscape and social factors.	ran	8 11	0	1
31144064	2019	Cox regression analysis with time-dependent covariates was used to investigate the relationship between atrial high-rate episodes and MACEs.	Cox	0 3	0	1
31144064	2019	Multivariable Cox regression analysis showed that AHREs 5 min (HR 1.788, 95% confidence interval 1.247-2.562, p = 0.002), diabetes (HR 1.909, 95% confidence interval 1.358-2.683, p < 0.001), heart failure (HR 2.203, 95% confidence interval 1.527-3.178, p < 0.001), and coronary artery disease (HR 1.862, 95% confidence interval 1.293-2.681, p = 0.001) were associated to major adverse cardiovascular…	Cox	14 17	0	1
31144065	2019	Furthermore, nucleotide degradation rates, measured on aortic side in calcific aortic valve disease (n = 62), negatively correlated with echocardiographic and biochemical parameters of disease severity (aortic jet velocity vs. ATP hydrolysis: r = - 0.30, p < 0.05; vs. AMP hydrolysis: r = - 0.44, p < 0.001; valvular phosphate concentration vs. ATP hydrolysis: r = - 0.26, p < 0.05; vs. AMP hydrolys…	jet	210213	0	1
31144065	2019	We have also demonstrated a presence of A1, A2a and A2b adenosine receptors with diminished expression of A2a and A2b in stenotic vs. non-stenotic valves.	A2a	44 47	1	0
31144065	2019	We have also demonstrated a presence of A1, A2a and A2b adenosine receptors with diminished expression of A2a and A2b in stenotic vs. non-stenotic valves.	A2a	106109	1	0
31144065	2019	We have also demonstrated a presence of A1, A2a and A2b adenosine receptors with diminished expression of A2a and A2b in stenotic vs. non-stenotic valves.	A2b	114117	1	0
31144076	2019	After detachment from rabbit's skin, fully engorged I. ricinus females were treated with 20 mul of pyrethroid solutions at five concentrations from 0.01562 to 0.25% and kept at 28 C and 75% relative humidity.	mul	92 95	0	1
31144113	2019	Two specifications of polyvinyl alcohol microspheres including colorless microspheres (1 g microspheres with 7 mL 0.9% sodium chloride (SC) per vial, size: 500-700 m) and blue microspheres (2 g microspheres with 7 mL 0.9% SC per vial, size: 500-700 m) were assessed for biocompatibility.	vial	144148	0	1
31144113	2019	Two specifications of polyvinyl alcohol microspheres including colorless microspheres (1 g microspheres with 7 mL 0.9% sodium chloride (SC) per vial, size: 500-700 m) and blue microspheres (2 g microspheres with 7 mL 0.9% SC per vial, size: 500-700 m) were assessed for biocompatibility.	vial	229233	0	1
31144128	2019	The core idea behind the formulation of IABC-EMBOT relies on two significant ameliorations that, i) focuses on the modification of Monarchy Butterfly Optimization that enhances the exploration degree based on the rate of exploitation of the searching space and ii) concentrates on the elimination in the limitations of the ABC scheme by enhancing the possibility of search diversification process th…	ABC	323326	0	1
31144171	2019	METHODS: Two hundred sixty-seven young people with cancer (n =83 cancer patients receiving active treatment: n =174 cancer survivors, 57.1% >1 year since treatment completion) and 321 controls completed a health and lifestyle questionnaire which included validated measures of physical activity (Godin Leisure Time Exercise Questionnaire), diet (Dietary Instrument for Nutrition Education, DINE), sm…	DINE	390394	0	1
31144179	2019	The second group treated with 200 ml propolis/kg bwt. every other day by stomach gavage tube, third group was intraperitoneally injected with AIS (20 mg/kg) twice a week for 8 weeks, and the fourth group received propolis extract and AIS.	AIS	142145	0	1
31144179	2019	The second group treated with 200 ml propolis/kg bwt. every other day by stomach gavage tube, third group was intraperitoneally injected with AIS (20 mg/kg) twice a week for 8 weeks, and the fourth group received propolis extract and AIS.	AIS	234237	0	1
31144187	2019	In this work, a novel capacitive flexible pressure sensors was prepared by using silver nanowire (AgNW)-paper substrates as electrodes and polydimethylsiloxane as dielectrics, and results revealed that the sensitivity and dynamic range of the as-prepared sensor were 1.05 kPa-1 and 1 Pa to 2 kPa, respectively, which were comparable to the state-of-the-art ones;	kPa	292295	0	1
31144187	2019	Practical application measurements further indicated that the capacitive flexible pressure sensors was capable of detecting bending, finger tap, and human speech as well as identifying object profile;	tap	140143	0	1
31144206	2019	X-tile software was used to divide the transgelin-2 mRNA expression level in the database, logistic regression model was used to identify independent factors influencing transgelin-2 mRNA expression, and then Cox regression and Kaplan-Meier analysis were used to find factors that influence survival of breast cancer.	Cox	209212	0	1
31144206	2019	Logistic regression model revealed that TNM stage, estrogen receptor and progesterone receptor status were independent factors for transgelin-2 mRNA expression.	TNM	40 43	0	1
31144209	2019	(ii) monoclonal antibodies modifications such as immunoglobulin G subclass switching, Fc mutation, or IgG hexamerization to improve the fixation and activation of C1q;	IgG	102105	1	0
31144209	2019	(ii) monoclonal antibodies modifications such as immunoglobulin G subclass switching, Fc mutation, or IgG hexamerization to improve the fixation and activation of C1q;	C1q	163166	1	0
31144222	2019	Initial Validation of IBD KNOW-IT: Measuring Patient and Caregiver Knowledge of a Child's Disease and Treatment Regimen.	IBD	22 25	0	1
31144222	2019	The present study describes the development and initial validation of a newly developed measure of child and caregiver knowledge of the child's own IBD and treatment, called IBD KNOW-IT.	IBD	148151	0	1
31144222	2019	The present study describes the development and initial validation of a newly developed measure of child and caregiver knowledge of the child's own IBD and treatment, called IBD KNOW-IT.	IBD	174177	0	1
31144222	2019	One hundred and fifty-five children and their caregivers completed the IBD KNOW-IT as well as a scale designed to compare each dyad's perceived knowledge to their actual knowledge.	IBD	71 74	0	1
31144222	2019	Initial psychometric evaluation of IBD KNOW-IT was completed by conducting factor analysis and determining internal consistency, convergent validity, and associations with demographic and medical characteristics.	IBD	35 38	0	1
31144222	2019	Support for the internal consistency of IBD KNOW-IT was obtained.	IBD	40 43	0	1
31144222	2019	Preliminary psychometric evaluation suggests that IBD KNOW-IT is reliable and valid.	IBD	50 53	0	1
31144255	2019	Finally, the maximum values of hardness and compressive strength of the sintered turkey hydroxyapatite were obtained at 1150 C (37.44 MPa and 3.2 GPa, respectively).	GPa	146149	0	1
31144391	2019	Multivariate Cox regression analysis result showed insulin-like growth factor 1 and insulin-like growth factor binding protein 1 levels significantly correlated with genistein dose.	Cox	13 16	0	1
31144436	2019	In response to the lumpy skin disease epizootic, animal trade and movement were prohibited, complete stamping out, disinfection, disinsection and an entire bovine population vaccination using the homologous Neethling live attenuated vaccine (OBP, South Africa) were conducted.	OBP	242245	0	1
31144454	2019	After chromatographic separation on an ACE Excel 2 AQ column, high abundant creatinine and uric acid and the other low abundant purines were sequentially detected by ultraviolet and quadrupole time-of-flight mass spectrometry within a single run.	ACE	39 42	0	1
31144464	2019	Streptozotocin-induced diabetic mice were injected with 100 muL of SHED-CM or dulbecco's modified eagle's medium into the unilateral hindlimb muscles twice a week over a period of 4 weeks.	muL	60 63	0	1
31144489	2019	Smoking reduces PSA accuracy for detection of prostate cancer: results from an Italian cross-sectional study.	PSA	16 19	1	0
31144489	2019	BACKGROUND: The aim of our study is to evaluate the diagnostic accuracy of PSA according to the smoking status in a cohort of European men undergoing prostate biopsy.	PSA	75 78	1	0
31144489	2019	We excluded men who had PSA >30ng/ml.	PSA	24 27	1	0
31144489	2019	Receiver-operator characteristics curve analysis were used to compare predictive properties of PSA across smoking categories for the final histopathological diagnosis of prostate cancer.	PSA	95 98	1	0
31144489	2019	RESULTS: 872 patients were enrolled. with a median age and PSA of 67 years (IQR: 61/74) and 6.2 ng/ml (IQR: 4.4/9.7) respectively.402/872 patients (46%) were non-smokers;	PSA	59 62	1	0
31144489	2019	PSA accuracy for smokers (AUC= 0.47, p=0.490) was lower when compared to non-smokers (AUC= 0.59, p=0.003) and former smokers (AUC=0.59, p=0.005).	PSA	0 3	1	0
31144489	2019	CONCLUSIONS: Ina cohort of Italian men undergoing prostate biopsy, the performance accuracy of PSA, as a predictor of prostate cancer, is lower in smokers.	PSA	95 98	1	0
31144489	2019	Although the molecular link behind our findings is still unknown, our study firstly showed that the PSA accuracy for PCa diagnosis is significantly influential by smoking.	PSA	100103	1	0
31144489	2019	Although the molecular link behind our findings is still unknown, our study firstly showed that the PSA accuracy for PCa diagnosis is significantly influential by smoking.	PCa	117120	0	1
31144493	2019	Patients in the acute phase based on coronary artery dilation were subdivided into Group I (with CAD) and Group II (without CAD) and compared.	CAD	97100	0	1
31144493	2019	Patients in the acute phase based on coronary artery dilation were subdivided into Group I (with CAD) and Group II (without CAD) and compared.	CAD	124127	0	1
31144502	2019	We modified the plastic antibody (molecularly imprinted polymer (MIP)) on the surface of persistent luminescence nanoparticle (La3Ga5GeO14: Cr3+, Zn2+, LGGO) as the specific adsorptive nanocarrier for toxic molecules and realized the nanocarrier was widely distributed for absorbing pesticide and real-time in vivo bioimaging.	MIP	65 68	0	1
31144511	2019	Microvessel density, assessed by CD34 and CD133, was significantly higher in patients with cardiac autonomic neuropathy [160 (125-175) vs 121 (100-154)/1 mm2, p = 0.001 and 92 (83-104) vs 79 (63-92)/1 mm2, p = 0.007, respectively] and CD34 in patients with diabetic peripheral neuropathy [135 (106-168) vs 121 (95-145)/1 mm2, p = 0.018], as compared with subjects without complications.	mm2	154157	0	1
31144511	2019	Microvessel density, assessed by CD34 and CD133, was significantly higher in patients with cardiac autonomic neuropathy [160 (125-175) vs 121 (100-154)/1 mm2, p = 0.001 and 92 (83-104) vs 79 (63-92)/1 mm2, p = 0.007, respectively] and CD34 in patients with diabetic peripheral neuropathy [135 (106-168) vs 121 (95-145)/1 mm2, p = 0.018], as compared with subjects without complications.	mm2	201204	0	1
31144511	2019	Microvessel density, assessed by CD34 and CD133, was significantly higher in patients with cardiac autonomic neuropathy [160 (125-175) vs 121 (100-154)/1 mm2, p = 0.001 and 92 (83-104) vs 79 (63-92)/1 mm2, p = 0.007, respectively] and CD34 in patients with diabetic peripheral neuropathy [135 (106-168) vs 121 (95-145)/1 mm2, p = 0.018], as compared with subjects without complications.	mm2	321324	0	1
31144525	2019	TAK1, P-TAK1, p38 and P-p38 showed greater expression and SMAD4 showed less expression when ALK5 was inhibited.	p38	14 17	1	0
31144590	2019	In the National Cancer Database cohort there was no significant difference in 5-year overall survival between radical prostatectomy plus adjuvant radiation therapy vs external beam radiation therapy plus brachytherapy (86.7% vs 87.0%, AHR 1.10, 95% CI 0.95-1.27, p=0.220).	AHR	235238	0	1
31144590	2019	In the SEER cohort there was no difference in 5-year prostate cancer specific mortality (6.0% vs 5.7%, AHR 1.22, 95% CI 0.0.88-1.71, p=0.234).	AHR	103106	0	1
31144591	2019	PURPOSE: The SPARED CRN (Study of Prostate Ablation Related Energy Devices Coordinated Registry Network) is a private-public partnership between academic and community urologists, the FDA (U.S. Food and Drug Administration), the Medical Device Epidemiology Network and device manufacturers to examine the safety and effectiveness of technologies for partial gland ablation in men with localized pros…	CRN	20 23	0	1
31144591	2019	RESULTS: Given the challenges in achieving patient and physician equipoise to perform a randomized trial, as well as an inherent paradigm shift when comparing partial gland ablation (inability to assess prostate specific antigen recurrence) to whole gland treatments, the group focused on objective performance criteria and goals as a platform to guide the creation of single arm studies in the SPAR…	CRN	402405	0	1
31144616	2019	DDR2 controls breast tumor stiffness and metastasis by regulating integrin mediated mechanotransduction in CAFs.	CAFs	107111	0	1
31144616	2019	We show in mouse breast tumors that the action of the collagen receptor DDR2 in CAFs controls tumor stiffness by reorganizing collagen fibers specifically at the tumor-stromal boundary.	CAFs	80 84	0	1
31144616	2019	The action of DDR2 in mouse and human CAFs, and tumors in vivo, was found to influence mechanotransduction by controlling full collagen-binding integrin activation via Rap1-mediated Talin1 and Kindlin2 recruitment.	CAFs	38 42	0	1
31144616	2019	The action of DDR2 in tumor CAFs is thus critical for remodeling collagen fibers at the tumor-stromal boundary to generate a physically permissive tumor microenvironment for tumor cell invasion and metastases.	CAFs	28 32	0	1
31144617	2019	In this study we demonstrate that TP63 directly regulates NRG1 expression in human SCC cell lines and that NRG1 is a critical component of the TP63 transcriptional program.	SCC	83 86	0	1
31144619	2019	RESULTS: Methods were applied to 55 intracranial saccular aneurysms from two sites, involving 3D DSA, CTA and MRA modalities.	CTA	102105	0	1
31144672	2019	Development and Testing of a Mobile App for Pain Management Among Cancer Patients Discharged From Hospital Treatment: Randomized Controlled Trial.	App	36 39	0	1
31144672	2019	Motivated by the need for better pain management in discharged patients, we developed a mobile phone app (Pain Guard) to provide continuous treatment information and feedback to discharged cancer patients suffering from pain.	app	101104	0	1
31144672	2019	OBJECTIVE: The aim was to design, construct, and test the Pain Guard app in patients managing cancer pain, evaluate the total remission rate of pain and the improvement in quality of life to improve pain management for cancer pain patients, and assess patient acceptance of the app.	app	69 72	0	1
31144672	2019	OBJECTIVE: The aim was to design, construct, and test the Pain Guard app in patients managing cancer pain, evaluate the total remission rate of pain and the improvement in quality of life to improve pain management for cancer pain patients, and assess patient acceptance of the app.	app	278281	0	1
31144672	2019	Participants were randomly assigned to a group receiving care through the Pain Guard app (n=31) or to a control group (n=27) who received only traditional pharmaceutical care.	app	85 88	0	1
31144672	2019	The system's usability, feasibility, app compliance, and satisfaction were also assessed.	app	37 40	0	1
31144672	2019	The frequency of breakthrough cancer pain in the app group was considerably lower than that in the control group (P<.001).	app	49 52	0	1
31144675	2019	Cox regression analysis was used to assess the relationship between LINC01555 expression and patient survival.	Cox	0 3	0	1
31144684	2019	Following the 2014 Ebola virus disease outbreak, South London and Maudsley NHS Trust were commissioned to develop a psychological intervention that UK clinicians could train national staff with minimal psychological experience to deliver to their peers.	NHS	75 78	0	1
31144698	2019	More importantly, mangiferin improved the expression levels of mRNA and protein of PPAR-gamma, OPA-1, Cav-1, EB1, NF-kappaB p65, NLRP3, Cas-1 and IL-1beta, and decreased the positive protein expression rates of HSP90, HMGB1, SYK, CCL20, C-CAS-3, C-PARP and STARD1.	EB1	109112	1	0
31144698	2019	More importantly, mangiferin improved the expression levels of mRNA and protein of PPAR-gamma, OPA-1, Cav-1, EB1, NF-kappaB p65, NLRP3, Cas-1 and IL-1beta, and decreased the positive protein expression rates of HSP90, HMGB1, SYK, CCL20, C-CAS-3, C-PARP and STARD1.	SYK	225228	1	0
31144722	2019	Cryosections from each muscle from each bird were immunofluorescence stained to detect Myf-5, MyoD, and Pax7-expressing myogenic stem cells.	MyoD	94 98	1	0
31144771	2019	Our results show for the first time that infants can rely on kinematic information to pick up on the emotional content of an action.	pick	86 90	0	1
31144826	2019	(PsycINFO Database Record (c) 2019 APA, all rights reserved).	APA	35 38	0	1
31144828	2019	(PsycINFO Database Record (c) 2019 APA, all rights reserved).	APA	35 38	0	1
31144829	2019	(PsycINFO Database Record (c) 2019 APA, all rights reserved).	APA	35 38	0	1
31144843	2019	(PsycINFO Database Record (c) 2019 APA, all rights reserved).	APA	35 38	0	1
31144848	2019	(PsycINFO Database Record (c) 2019 APA, all rights reserved).	APA	35 38	0	1
31144851	2019	(PsycINFO Database Record (c) 2019 APA, all rights reserved).	APA	35 38	0	1
31144852	2019	(PsycINFO Database Record (c) 2019 APA, all rights reserved).	APA	35 38	0	1
31144853	2019	(PsycINFO Database Record (c) 2019 APA, all rights reserved).	APA	35 38	0	1
31144858	2019	(PsycINFO Database Record (c) 2019 APA, all rights reserved).	APA	35 38	0	1
31144988	2019	Aberrant expression of CYTOR was significantly related to TNM stage, T stage, N stage, and perineural and venous invasions.	TNM	58 61	0	1
31144996	2019	Hemoglobin SS (betaS/betaS) was the most common (in 246 patients, i.e. 62.1%) followed by hemoglobin S (HBB: c.20A>T)-beta-thalassemia (Hb S-beta-thal) in 138 (34.8%) and 11 (2.8%) hemoglobin S/Hb D-Punjab (HBB: c.364G>C).	HBB	104107	1	0
31144996	2019	Hemoglobin SS (betaS/betaS) was the most common (in 246 patients, i.e. 62.1%) followed by hemoglobin S (HBB: c.20A>T)-beta-thalassemia (Hb S-beta-thal) in 138 (34.8%) and 11 (2.8%) hemoglobin S/Hb D-Punjab (HBB: c.364G>C).	HBB	207210	1	0
31145014	2019	The aldosterone target ENaC and the mineralocorticoid receptor were expressed in the human saccule sensory epithelium.	ENaC	23 27	0	1
31145015	2019	Ultraviolet-c radiation during the pupal stage affects morphological changes of wings in Tribolium castaneum (Col; Tenebrionidae).	Col	110113	0	1
31145046	2019	Zebrafish were habituated for 3 consecutive days in the experimental tank, and training session was performed for 10 min using two identical nonpreferred objects (black cube or sphere).	tank	69 73	0	1
31145046	2019	Fish were also exposed to the novel tank diving test to assess locomotion and anxiety-like behaviors.	tank	36 40	0	1
31145055	2019	Early adopters in well-equipped teaching centres in close proximity to large clinical laboratories are likely to be early beneficiaries of rapid antimicrobial susceptibility testing, while simplified and lower-cost technology is needed to support poorly resourced hospitals in developing countries, with their higher burden of AMR.	AMR	327330	0	1
31145067	2019	A CD4 count performed 4 months prior was 570 cells/mL3;	CD4	2 5	1	0
31145118	2019	SUMMARY: Although energy expenditure can now be measured, we miss indicators of early endogenous energy production and of protein needs.	miss	61 65	0	1
31145137	2019	PURPOSE OF REVIEW: Cleft lip repair requires multidisciplinary follow-up throughout a child's life and often requires lip revision surgery in adolescence to restore function and symmetry of the lip.	lip	118121	0	1
31145137	2019	PURPOSE OF REVIEW: Cleft lip repair requires multidisciplinary follow-up throughout a child's life and often requires lip revision surgery in adolescence to restore function and symmetry of the lip.	lip	194197	0	1
31145137	2019	There is significant variability in the approaches taken for lip repair and therefore a review of current techniques and subsequent guidance to secondary cleft lip repair is warranted.	lip	61 64	0	1
31145137	2019	Muscle deformities generally require total lip revision and rerepair as a first step to achieving longstanding improvements in lip esthetics and function.	lip	43 46	0	1
31145137	2019	Muscle deformities generally require total lip revision and rerepair as a first step to achieving longstanding improvements in lip esthetics and function.	lip	127130	0	1
31145165	2019	DATA EXTRACTION: The CASP tools were utilized for appraisal of individual studies.	CASP	21 25	0	1
31145169	2019	METHODS: A quality improvement project was undertaken with a PEST model of nursing care introduced from January 2017 to December 2017 in the cardiology intensive care unit to guide nursing staff to assess and render appropriate interventions along patient domains such as pain, endotracheal tube securement, sedation, and tie to prevent incidences of self-extubation.	tie	322325	0	1
31145172	2019	METHODS: Using surface electrodes, diaphragmatic MEP and CMAP were recorded in 70 subjects (34 13 years, 25 men) following supramaximal cortical magnetic stimulation and CEMS at functional residual capacity and using a standardized inspiratory pressure trigger (-0.5 kPa).	CMAP	57 61	0	1
31145172	2019	METHODS: Using surface electrodes, diaphragmatic MEP and CMAP were recorded in 70 subjects (34 13 years, 25 men) following supramaximal cortical magnetic stimulation and CEMS at functional residual capacity and using a standardized inspiratory pressure trigger (-0.5 kPa).	kPa	267270	0	1
31145172	2019	RESULTS: At functional residual capacity, upper limit of normal for MEP latency was 25 ms in men and 23 ms in women (p < 0.05), and upper limit of normal for CMAP latency was 6 ms.	MEP	68 71	0	1
31145172	2019	RESULTS: At functional residual capacity, upper limit of normal for MEP latency was 25 ms in men and 23 ms in women (p < 0.05), and upper limit of normal for CMAP latency was 6 ms.	CMAP	158162	0	1
31145172	2019	In contrast to MEP and CMAP amplitude, corresponding latencies showed little interindividual and intraindividual variability.	MEP	15 18	0	1
31145172	2019	In contrast to MEP and CMAP amplitude, corresponding latencies showed little interindividual and intraindividual variability.	CMAP	23 27	0	1
31145172	2019	Use of an inspiratory pressure trigger enhanced reproducibility and amplitude of diaphragm MEP.	MEP	91 94	0	1
31145172	2019	Diaphragm CMAP amplitude showed weak-moderate correlations with forced vital capacity (r = 0.47; p < 0.01), maximum inspiratory pressure (r = 0.39; p < 0.01), and maximum expiratory pressure (r = 0.32; p < 0.01).	CMAP	10 14	0	1
31145208	2019	RESULTS: Forty-seven eyes of 33 patients could be fit successfully with EyeBrid silicone (LCS, Cane, France) or Airflex (SwissLens, Prilly, Switzerland) lenses.	LCS	90 93	0	1
31145271	2019	The prognostic nutritional index value was not related with patient age, sex, depth of tumor invasion, nodular metastasis, and differential grade but the TNM stage (III/IV vs 0/I/II, RR = 1.276, 95% confidence interval 1.146-1.420).	TNM	154157	0	1
31145275	2019	An experience was gained that in the process of bone bridge removal, the bit of navigated drill should be continuously washed with normal saline to cool down, so as to avoid damage of nerve caused by heat conduction.	bit	73 76	0	1
31145280	2019	The secondary outcome measures will include NT-pro BNP, quality of life and adverse reaction.	BNP	51 54	1	0
31145280	2019	All data will be analysed by using Stata 14.0 software and TSA v0.9 software.	TSA	59 62	0	1
31145290	2019	DIAGNOSES: Penetrating neck trauma due to percussive drill bit with common carotid artery injury.	bit	59 62	0	1
31145299	2019	METHODS: We searched CNKI, Wan fang, Chongqing VIP, China Biology Medicine disc, PubMed, Cochrane Library, and EMBASE for studies published as of Dec 31, 2018.	VIP	47 50	0	1
31145299	2019	METHODS: We searched CNKI, Wan fang, Chongqing VIP, China Biology Medicine disc, PubMed, Cochrane Library, and EMBASE for studies published as of Dec 31, 2018.	Dec	146149	0	1
31145300	2019	The decreased level of LMX1A was associated with large tumor size (P = .009), positive lymph node metastasis (P = .027), and advanced TNM stages (P = .002).	TNM	134137	0	1
31145301	2019	The prognosis analysis was performed using Cox regression model, and the results were shown as hazard ration with 95% confidence interval .The relative expression of let-7b was significantly lower in glioma tissues than that in normal brain tissues (P < .001).	Cox	43 46	0	1
31145308	2019	However, the effect of angiotensin converting enzyme 2 on Ang II-induced endothelial damage remains unknown.	Ang	58 61	1	0
31145308	2019	OBJECTIVE: To evaluate the effect of recombinant human angiotensin converting enzyme 2 on the Ang II-induced damage of human umbilical vein endothelial cells and the release of inflammatory mediator in vitro.	Ang	94 97	1	0
31145308	2019	METHODS: Cultured human umbilical vein endothelial cells were randomly divided into 6 groups: the control group, rhangiotensin converting enzyme 2 group, Ang II group, and Ang II+ recombinant human angiotensin converting enzyme 2 groups (3 subgroups).	Ang	172175	1	0
31145308	2019	Compared with the Ang II group, the cell viability and the rate of S phase cells in Ang II+rhangiotensin converting enzyme 2 groups were higher (P < .05) and the apoptosis percentage, the level of reactive oxygen species, interleukin 8, tumor necrosis factor-alpha, transforming growth factor-beta1, lactate dehydrogenase in Ang II+recombinant human angiotensin converting enzyme 2 groups were lower…	Ang	84 87	1	0
31145308	2019	Compared with the Ang II group, the cell viability and the rate of S phase cells in Ang II+rhangiotensin converting enzyme 2 groups were higher (P < .05) and the apoptosis percentage, the level of reactive oxygen species, interleukin 8, tumor necrosis factor-alpha, transforming growth factor-beta1, lactate dehydrogenase in Ang II+recombinant human angiotensin converting enzyme 2 groups were lower…	Ang	325328	1	0
31145309	2019	LESSONS: We suggest that simultaneous whole exome sequencing of causative genes of all family members is a useful strategy to identify pathogenetic mutations for hereditary RBC membrane disorders, mainly in cases with an ambiguous phenotype.	RBC	173176	0	1
31145314	2019	In the operated eye, the mean axial length increased significantly from 23.99 mm preoperatively to 24.08 mm 1 week postoperatively (P < .001), and although the mean anterior chamber depth decreased in this time, the decrease was not statistically significant.	mm 1	105109	0	1
31145315	2019	DIAGNOSIS: The slit lamp examination showed a vertically aligned angle-supported Kelman Multiflex anterior chamber intraocular lens in the anterior chamber.	lamp	20 24	0	1
31145318	2019	Chest computed and emergency surgery with CPB revealed completely transected supradiaphragmatic inferior vena cava, which reconstruction was essential.	CPB	42 45	0	1
31145319	2019	The average NRS score of patients was 2.25 points at 3 days postoperation.	NRS	12 15	0	1
31145347	2019	Ultrasound-guided lumbar selective nerve root block plus T12 paravertebral and sacral plexus block for hip and knee arthroplasty: Three case reports.	T12	57 60	0	1
31145347	2019	INTERVENTIONS: Ultrasound-guided lumbar selective nerve root block plus T12 paravertebral and sacral plexus block were performed in 2 patients who received hip arthroplasty and 1 patient who received knee arthroplasty.	T12	72 75	0	1
31145347	2019	LESSONS: Ultrasound-guided lumbar selective nerve root block plus T12 paravertebral and sacral plexus block not only satisfied the analgesia requirement of surgery, but also reduced the consumption of local anesthetic.	T12	66 69	0	1
31145348	2019	Single nucleotide and structural variants of CYP2D6 gene in Kinh Vietnamese population.	Kinh	60 64	0	1
31145348	2019	CYP2D6 genetic variations could result in alteration of CYP2D6 enzyme activity, leading to dissimilarity among individuals in regard of drug metabolism.This study aims to detect all genetic variants, allele, and genotype frequencies of CYP2D6 gene in 136 unrelated healthy Kinh Vietnamese volunteers.	Kinh	273277	0	1
31145348	2019	The most common alleles were the CYP2D6*10 (43.75%), *1 (18.75%), and tandem arrangement *36-*10 (12.13%).This study provides best information on CYP2D6 polymorphism comprising the newly discovered single nucleotide variants, structural variations, and their frequencies in Kinh Vietnamese.	Kinh	274278	0	1
31145355	2019	The 2015 Medicare Part D PUF data quantifies the antimicrobial prescription rate at the county level and data from US Census Bureau provides information on socioeconomic status at the county level.At the county level, we explained 48% of the variation in antimicrobial prescriptions by socioeconomic status, age, gender, and race.	PUF	25 28	0	1
31145360	2019	Congenital chloride losing diarrhea is a rare type of chronic watery diarrhea due to mutations in SLC26A3 gene leading to defective chloride-bicarbonate exchanges with the resultant loss of chloride and retention of bicarbonate.We aim to define pediatric Saudi congenital chloride losing diarrhea patients' characteristics to achieve prompt diagnosis, management, follow up with good quality of life…	Taif	697701	0	1
31145360	2019	Positive consanguinity and more than one affected sibling are present in most of our cohort.High index of suspicion by clinicians is a cornerstone for early diagnosis with subsequent favorable outcome.A multicenter national incidence study of congenital chloride losing diarrhea in KSA and its genetic attributes is recommended.	KSA	282285	0	1
31145404	2019	From these pro-ligands a family of luminescent Ir(iii) complexes of the general form [Ir(ppy)2(C^N)]+ or [Ir(ppy)2(C^C)]+ (where ppy is 2-phenylpyridine and C^N represents a bidentate imidazolylidene/triazole ligand and C^C represents a bidentate imidazolylidene/triazolylidene ligand) were prepared.	ppy	129132	0	1
31145462	2019	This resulted in an absence of cFOS expression in GnRH neurons (1 1% vs 28 4% of GnRH neurons; P < 0.01) and markedly reduced LH surge levels (2.5 0.6 vs 9.1 1.0 ng/mL; P < 0.01) in estrogen receptor alpha flox mice compared with controls.	cFOS	31 35	1	0
31145464	2019	It has been proven that CRP and albumin alone are useful in predicting a prognosis for stroke patients.	CRP	24 27	1	0
31145464	2019	A combination of these two parameters, namely the ratio of CRP to albumin (CAR), is believed to be a more accurate indicator of inflammatory status than CRP or albumin alone, and may be more valuable than either of them separately in predicting the prognosis of schaemic stroke patients.	CRP	59 62	1	0
31145464	2019	A combination of these two parameters, namely the ratio of CRP to albumin (CAR), is believed to be a more accurate indicator of inflammatory status than CRP or albumin alone, and may be more valuable than either of them separately in predicting the prognosis of schaemic stroke patients.	CAR	75 78	1	0
31145464	2019	A combination of these two parameters, namely the ratio of CRP to albumin (CAR), is believed to be a more accurate indicator of inflammatory status than CRP or albumin alone, and may be more valuable than either of them separately in predicting the prognosis of schaemic stroke patients.	CRP	153156	1	0
31145464	2019	However, the role of CAR as a predictor of mortality in patients with acute ischaemic stroke remains unclear.	CAR	21 24	1	0
31145464	2019	These groups were compared in terms of C-reactive protein, albumin, and CAR.	CAR	72 75	1	0
31145464	2019	RESULTS: The C-reactive protein and CAR values were higher, and the albumin level was lower, in non-surviving patients.	CAR	36 39	1	0
31145464	2019	The CAR value was also found to be a significant independent variable of 90-day mortality in patients with acute ischaemic stroke (p < 0.001).	CAR	4 7	1	0
31145464	2019	The optimum cut-off value of CAR in predicting the 90-day mortality for patients with acute ischaemic stroke was 0.50, with 64.1% sensitivity and 56.2% specificity.	CAR	29 32	1	0
31145464	2019	CONCLUSIONS AND CLINICAL IMPLICATIONS: Our study demonstrated that a high CAR value is an independent predictor of 90-day mortality in patients with acute ischaemic stroke.	CAR	74 77	1	0
31145542	2019	Similarly, survival was lower in patients with PAWP>12 compared to patients with PAWP 12 mmHg (p < .0001).	PAWP	81 85	0	1
31145647	2019	Type 2 diabetes mellitus and oral Candida colonization: Analysis of risk factors in a Sri Lankan cohort.	Sri	86 89	0	1
31145647	2019	Here, we describe the prevalence of oral Candida in a Sri Lankan cohort of type 2 diabetes mellitus and risk factors that predispose them to this common fungal infection.	Sri	54 57	0	1
31145647	2019	Conclusions: The oral infestation of Candida in our Sri Lankan cohort of diabetics is significantly higher than their healthy counterparts, and co-carriage of multiple yeast species is a common finding in the study population.	Sri	52 55	0	1
31145680	2019	The incorrect disposal of the heavy-metal containing copper and zinc sulfate solutions was identified as an important problem: In 59% of the sheep farms the remaining footbath solutions were disposed in the slurry pit or manure storage.	pit	214217	0	1
31145690	2019	Fluconazole simulation results were used as supportive evidence in discussions with the FDA and EMA about ruxolitinib dose adjustment when co-administering perpetrator drugs.	EMA	96 99	0	1
31145717	2019	Mold exposure was a serious concern because investigations after Hurricanes Katrina and Rita (2005) had documented extensive mold growth in flood-damaged homes (2,3).	Rita	88 92	0	1
31145730	2019	OBJECTIVES: To compare drug survival in patients with axial spondyloarthritis treated with different TNF inhibitors in standard dosage.	TNF	101104	1	0
31145730	2019	METHODS: Patients fulfilling the Assessment in SpondyloArthritis international Society classification criteria for axial spondyloarthritis in the Swiss Clinical Quality Management cohort were included in this study if a first TNF inhibitor on standard dosage was started after recruitment and if a baseline visit was available.	TNF	226229	1	0
31145730	2019	Drug maintenance up to drug discontinuation or dose escalation was compared between TNF inhibitors with multiple adjusted Cox proportional hazards models and multiple imputation for missing baseline covariate data.	TNF	84 87	1	0
31145730	2019	However, no significant differences in time up to drug discontinuation or dose escalation were observed in multiple adjusted analyses if treatment was initiated after 2009, when all 4 TNF inhibitors were available: hazard ratio for infliximab versus etanercept 1.16 (95% confidence interval 0.80; 1.67), p = 0.44, for golimumab versus etanercept 0.80 (0.58; 1.10), p = 0.17 and for adalimumab versus…	TNF	184187	1	0
31145730	2019	CONCLUSION: In axial spondyloarthritis, drug survival with standard doses of different TNF inhibitors is comparable.	TNF	87 90	1	0
31145732	2019	To elucidate the pathology of MODY, we established MODY3 patient-derived iPS (MODY3-iPS) cells using non-integrating Sendai virus vector and examined the mutant mRNA and protein of Hepatocyte Nuclear factor 1A after pancreatic lineage differentiation.	iPS	73 76	0	1
31145751	2019	These results suggest that silymarin has a bactericidal effect and can contribute to the control and establishment of a TH1 protective immune response against mycobacterial infection.	TH1	120123	0	1
31145755	2019	By whole genome sequencing of a panel of recombinant host-range extended MVAs generated by marker rescue with 40 kbp segments of vaccinia virus DNA, we identified serine protease inhibitor 1 as one of several candidate host-range factors present in those viruses that gained the ability to replicate in human cells.	kbp	113116	0	1
31145757	2019	Relative abundances of high-risk antimicrobial resistance genes and co-localisation of these genes on the same sequence read were higher in the laundry trolley and mop bucket samples, compared to the intensive care unit cages, suggesting that amplification of antimicrobial resistance genes is likely to occur in the collection points for hospital waste.	mop	164167	0	1
31145786	2019	Newborn screening for sickle cell disease: an innovative pilot program to improve child survival in Dar es Salaam, Tanzania.	Dar	100103	0	1
31145879	2019	Hazard ratios were derived from Cox models (all-cause mortality) and Fine-Gray competing risk models (cardiovascular and non-cardiovascular mortality).	Cox	32 35	0	1
31145888	2019	The present study evidences an A-esterase activity of turkey on a thio form OP compound, which is stereoselective and activated by copper.	thio	66 70	0	1
31145903	2019	RESULTS: Several assays showed L-index thresholds derived from endogenously lipemic specimens that were below previously defined limits from the package inserts [new (prior)]: AAT 400 (500);	AAT	176179	1	0
31145903	2019	CERU 100 (200);	CERU	0 4	1	0
31145906	2019	Saikosaponin-d inhibited the protein expression of LPA1 both in the CA1 and CA3 region of the hippocampus.	CA1	68 71	0	1
31145906	2019	Saikosaponin-d inhibited the protein expression of LPA1 both in the CA1 and CA3 region of the hippocampus.	CA3	76 79	0	1
31145906	2019	Moreover, saikosaponin-d significantly decreased the levels of RhoA, ROCK2, p-p38, p-ERK, p-p65, p-IkappaBalpha in LPS-stimulated mice as well as in LPA-stimulated SH-SY5Y cells.	RhoA	63 67	1	0
31145915	2019	Peyer's patches contain abundant isotype-switched B cells with activated phenotypes and are inductive sites for T-independent anti-DNA IgA.	IgA	135138	0	1
31145915	2019	Peyer's patches are inductive sites for IgA production;	IgA	40 43	1	0
31145915	2019	However, the induction mechanism of IgA remains largely unknown.	IgA	36 39	1	0
31145915	2019	Hybridomas established from PP B cells of untreated mice revealed that IgA mainly react with DNA.	IgA	71 74	1	0
31145915	2019	PP-deficient mice revealed that peyer's patches were dispensable for a total intestinal IgA amount but were required for intestinal anti-diet extract and anti-DNA IgA.	IgA	88 91	1	0
31145915	2019	PP-deficient mice revealed that peyer's patches were dispensable for a total intestinal IgA amount but were required for intestinal anti-diet extract and anti-DNA IgA.	IgA	163166	1	0
31145915	2019	Antibiotic-treated mice and CD4+ T cell-depleted mice demonstrated that the intestinal anti-DNA IgA was induced by microbiota in a T-independent manner.	IgA	96 99	1	0
31145915	2019	Interestingly, the oral administration of IgA led to the expansion of intestinal bacteria in a reactivity-independent manner.	IgA	42 45	1	0
31145915	2019	Our findings suggest that peyer's patches are unique and efficient inductive sites for IgA, particularly against T-independent antigens.	IgA	87 90	0	1
31145960	2019	From a supramolecular structure viewpoint, we concern how concurrent microwave and heat moisture treatment tailors the pasting and digestion features of indica rice starch and waxy rice starch, using combined analytical methods such as scanning electron microscopy and small-angle X-ray scattering.	waxy	176180	0	1
31145960	2019	Also, compared to waxy rice starch, indica rice starch had more amylose with relatively long branches, which probably contributed to starch chain interactions during microwave and heat moisture treatment.	waxy	18 22	0	1
31146000	2019	Pinellia pedatisecta Schott extract (PE) has been confirmed to suppress cervical tumor growth and modulate the antitumor CD4+T helper immunity towards Th1.	Th1	151154	0	1
31146000	2019	Furthermore, PE treatment in vivo enhanced the proliferation, activated the functional ability (increased Ki67, CD137, GZMB or IFN-gamma, TNF-alpha expression) and reversed the exhaustion (impaired CD95 or PD-1 expression) of antitumor T cells.	GZMB	119123	1	0
31146000	2019	CONCLUSIONS: PE efficiently restored the immature status of TADCs and enhanced their function as antigen-presenting cells to further elicit antitumor Th1 and cytotoxic t lymphocyte responses, suggesting that PE may be a potential immunomodulatory drug for cancer treatment.	Th1	150153	0	1
31146002	2019	AIM OF THE STUDY: In this study, modern biomedical approaches were employed for investigating the protective/preventive effects of shaoyao decoction in mice with azoxymethane /DSS-induced CRC.	CRC	188191	0	1
31146002	2019	MATERIALS AND METHODS: The mice pretreated with AOM/DSS were randomly allocated to SYDL, SYDM, SYDH group and SASP (sulfasalazine) group.	SYDM	89 93	0	1
31146002	2019	MATERIALS AND METHODS: The mice pretreated with AOM/DSS were randomly allocated to SYDL, SYDM, SYDH group and SASP (sulfasalazine) group.	SASP	110114	0	1
31146002	2019	Particularly, the expressions rates of NF-kappaB and Ki-67 in the SYD-treated experimental groups were significantly lower than those in the model group, indicating that the proliferative ability of the CRC tissues was weaker in the SYD-treated experimental groups.	CRC	203206	0	1
31146002	2019	CONCLUSIONS: To sum up, our results suggest that shaoyao decoction inhibits the development of acute/chronic colitis and prevents colitis-associated CRC by suppressing inflammation and preventing oxidative stress-induced cellular damage.	CRC	149152	0	1
31146003	2019	TFAP2A downregulated NR4A1 expression, while five ETS transcription factors, ETS1, ELK1, ERG, FLI1 and SPI1, could upregulate NR4A1 promoter activity in HeLa cells.	ERG	89 92	1	0
31146004	2019	Histone deacetylase inhibitors increase SERCA3 mRNA expression in gastric and breast cancer cell lines by increasing H3K9ac and binding of Sp1 and Sp3 transcription factors to the promoter;	Sp1	139142	1	0
31146004	2019	Histone deacetylase inhibitors increase SERCA3 mRNA expression in gastric and breast cancer cell lines by increasing H3K9ac and binding of Sp1 and Sp3 transcription factors to the promoter;	Sp3	147150	1	0
31146004	2019	Besides, NaB treated cells increased Sp1 and Sp3 occupancy at ATP2A3 promoter;	Sp1	37 40	1	0
31146004	2019	Besides, NaB treated cells increased Sp1 and Sp3 occupancy at ATP2A3 promoter;	Sp3	45 48	1	0
31146006	2019	G6PDH activity increased during white spot syndrome virus infection, and its substrate G6P decreased, while PDH activity decreased and its substrate pyruvate increased.	PDH	108111	1	0
31146009	2019	Since learning and memory are closely associated with cholinergic forebrain function ChAT fiber density after exercise training was assessed in hippocampus, and motor- and somatosensory cortical areas.	ChAT	85 89	1	0
31146009	2019	Regarding cholinergic neuronal innervation, apart from a general age-related decline, exercise increased ChAT fiber density in the hippocampus CA1 area and in the motor cortex notably in the 32-months group.	ChAT	105109	1	0
31146009	2019	Regarding cholinergic neuronal innervation, apart from a general age-related decline, exercise increased ChAT fiber density in the hippocampus CA1 area and in the motor cortex notably in the 32-months group.	CA1	143146	0	1
31146009	2019	Massive ChAT fiber aberrations in all investigated areas which developed in senescence were clearly attenuated by exercise.	ChAT	8 12	1	0
31146046	2019	Pairwise alignments of the new genome with representative sequences of different genotypes showed inconsistent homology between different protein-encoding regions, of which NS1 and VP2 were found as the variable proteins, and NS3, NS5, and NS6/7 were found as the conserved ones.	NS1	173176	1	0
31146046	2019	Pairwise alignments of the new genome with representative sequences of different genotypes showed inconsistent homology between different protein-encoding regions, of which NS1 and VP2 were found as the variable proteins, and NS3, NS5, and NS6/7 were found as the conserved ones.	NS3	226229	1	0
31146046	2019	Pairwise alignments of the new genome with representative sequences of different genotypes showed inconsistent homology between different protein-encoding regions, of which NS1 and VP2 were found as the variable proteins, and NS3, NS5, and NS6/7 were found as the conserved ones.	NS5	231234	1	0
31146046	2019	Phylogenetic analysis based on full-length VP1 sequences demonstrated that 11 GII.8 strains could be divided into 4 clusters A-D, with 88 SNP and 10 SAP spots occurred during their evolutionary process.	SAP	149152	0	1
31146060	2019	Quantifying peak pathogen concentrations at the intakes of drinking water plants is a challenge due to the variability of CSO occurrences and uncertainties with regards to the fate and transport mechanisms from discharge points to source water supplies.	CSO	122125	0	1
31146060	2019	Here, a two-dimensional deterministic hydrodynamic and water quality model is used to study the fluvial contaminant transport and the impacts of the upstream CSO discharges on the downstream concentrations of Escherichia coli in the raw water supply of two drinking water plants, located on a large river.	CSO	158161	0	1
31146060	2019	CSO dynamic loading characteristics were considered for a variety of discharges.	CSO	0 3	0	1
31146060	2019	During optimal operational performance of the plants, the daily risk target was met (based on the mean concentration during the peak) for 80% to 90% of CSO events.	CSO	152155	0	1
31146060	2019	Mean annual microbial risk following CSO discharge events was more dependent on treatment performance rather than the number of CSO occurrences.	CSO	37 40	0	1
31146060	2019	Mean annual microbial risk following CSO discharge events was more dependent on treatment performance rather than the number of CSO occurrences.	CSO	128131	0	1
31146063	2019	Study sites at Radzy Che mi ski and Rywa d were used to differentiate Pb sources.	ski	28 31	0	1
31146063	2019	Radzy Che mi ski is located in the vicinity of a late Medieval Teutonic Order castle and town, while Rywa d is situated within a relatively pristine area until the 19th century when it became used for agricultural purpose.	ski	13 16	0	1
31146063	2019	At Radzy Che mi ski, modeled anthropogenic Pb contribution and measured Pb concentration follow similar trends.	ski	16 19	0	1
31146083	2019	Adherence varied largely per agent and per concentration ratio (ratio of the detected concentration with liquid chromatography-tandem mass spectrometry and the PTC) cut-off value.	PTC	160163	0	1
31146087	2019	We sought to determine if the Distressed Communities Index, a composite ranking by zip code that quantifies socioeconomic risk, was associated with long-term survival after bariatric surgery.	zip	83 86	0	1
31146095	2019	In an analysis of a published dataset derived from a population study, we observed that methyladenosine writers (METTL3 and WTAP), erasers (FTO and ALKBH5) and readers (HNRPC) showed significantly higher expression among participants in the high-PM2.5exposure group compared to those in the low-exposure control group (all p < 0.05).	WTAP	124128	1	0
31146095	2019	In an analysis of a published dataset derived from a population study, we observed that methyladenosine writers (METTL3 and WTAP), erasers (FTO and ALKBH5) and readers (HNRPC) showed significantly higher expression among participants in the high-PM2.5exposure group compared to those in the low-exposure control group (all p < 0.05).	FTO	140143	0	1
31146101	2019	The range (P90 vs. P10) of differences in urinary concentrations within each age group was for most compounds around 10-20 fold, and was very high for triclosan up to 35 and 350-fold in children and mothers respectively.	P90	11 14	0	1
31146101	2019	The range (P90 vs. P10) of differences in urinary concentrations within each age group was for most compounds around 10-20 fold, and was very high for triclosan up to 35 and 350-fold in children and mothers respectively.	P10	19 22	0	1
31146104	2019	These results showed that the long-term protective mechanism of IL-33 in ischemic stroke may be partly associated to its modulation role for splenic T-cell immune responses through inhibiting Th1 response and promoting Treg response, suggesting that IL-33 may be a candidate treatment for human stroke via modulating the peripheral immune system following stroke.	Th1	192195	0	1
31146108	2019	Rats were treated with unloaded nanocapsules (P80, polyethylene glycol, EUD and chitosan surfaces) daily for 14 days per oral route.	P80	46 49	0	1
31146110	2019	Specifically, brequinar at a concentration of 50 mug, provided 25% protection for 5 days following fmd virus challenge.	mug	49 52	0	1
31146114	2019	The renal cell carcinoma cells lines ACHN and 786-O, as well as the non-cancerous human embryonic kidney cell line HEK293, were used to assess the cytotoxicity and tumor-efficient uptake of Caba-780 in vitro.	ACHN	37 41	0	1
31146117	2019	NeuroImage Clinical 2018 Jun 5;19:716-726".	Jun	25 28	0	1
31146117	2019	However, recently Prof.	Prof	18 22	0	1
31146120	2019	RESULTS: Compared to the healthy controls, immune thrombocytopenia patients had higher percentages of CD4 + CD25+ T cells, CD4 + HLA-DR+ T cells, CD8 + HLA-DR+ T cells, and CD8 + CD69+ T cells.	CD4	123126	1	0
31146120	2019	RESULTS: Compared to the healthy controls, immune thrombocytopenia patients had higher percentages of CD4 + CD25+ T cells, CD4 + HLA-DR+ T cells, CD8 + HLA-DR+ T cells, and CD8 + CD69+ T cells.	CD8	146149	1	0
31146120	2019	RESULTS: Compared to the healthy controls, immune thrombocytopenia patients had higher percentages of CD4 + CD25+ T cells, CD4 + HLA-DR+ T cells, CD8 + HLA-DR+ T cells, and CD8 + CD69+ T cells.	CD8	173176	1	0
31146120	2019	Compared to the thrombocytosis patients, immune thrombocytopenia patients had higher percentages of CD4 + HLA-DR+ T cells and CD8 + HLA-DR+ T cells, and lower CD4 + CD69+ T cells and CD8 + CD69+ T cells.	CD8	126129	1	0
31146120	2019	Compared to the thrombocytosis patients, immune thrombocytopenia patients had higher percentages of CD4 + HLA-DR+ T cells and CD8 + HLA-DR+ T cells, and lower CD4 + CD69+ T cells and CD8 + CD69+ T cells.	CD4	159162	1	0
31146120	2019	Compared to the thrombocytosis patients, immune thrombocytopenia patients had higher percentages of CD4 + HLA-DR+ T cells and CD8 + HLA-DR+ T cells, and lower CD4 + CD69+ T cells and CD8 + CD69+ T cells.	CD8	183186	1	0
31146120	2019	CD4 + CD69+ T cells were decreased in chronic compared to the newly diagnosed and persistent immune thrombocytopenia patients.	CD4	0 3	1	0
31146126	2019	An unusual conformation of the glycan was observed in all binding sites with a non-canonical syn orientation of the N-acetyl group of N-acetyl-glucosamine.	syn	93 96	0	1
31146136	2019	We used the wild homozygous genotype as a reference, subjects carrying TERT rs2736109 AA, TERT rs3215401 CC and TERT rs2736100 GT + GG genotypes had significantly longer telomere length in the exposure group (P < 0.05).	TERT	71 75	1	0
31146136	2019	We used the wild homozygous genotype as a reference, subjects carrying TERT rs2736109 AA, TERT rs3215401 CC and TERT rs2736100 GT + GG genotypes had significantly longer telomere length in the exposure group (P < 0.05).	TERT	90 94	1	0
31146136	2019	We used the wild homozygous genotype as a reference, subjects carrying TERT rs2736109 AA, TERT rs3215401 CC and TERT rs2736100 GT + GG genotypes had significantly longer telomere length in the exposure group (P < 0.05).	TERT	112116	1	0
31146136	2019	In conclusion, the workers exposed to coke oven emissions had shorter telomere length, which was regulated by the TPP1, TERF1, TERF2 and POT1 genes expression levels, and the gene polymorphisms of TERT gene were associated with the telomere length among PAHs-exposure workers.	TERT	197201	1	0
31146159	2019	Experimental research show that developmental exposure to PCB may alter function of brain pleasure centers and potentially influence disinhibitory behaviors, including tobacco and alcohol use.	PCB	58 61	0	1
31146159	2019	Yet, the potential effects of developmental PCB exposure on adolescent substance use have not been studied in humans.	PCB	44 47	0	1
31146159	2019	We used the Child Health and Development Studies, a prospective birth cohort study in the Oakland and East Bay areas of California, to investigate associations between prenatal exposure to PCB congeners (66, 74, 99, 118, 138, 153, 170, 180, 187, and 203) and later disinhibitory behaviors in adolescents, specifically alcohol consumption and smoking, in a randomly selected sample (n = 554).	PCB	189192	0	1
31146159	2019	Total prenatal PCB exposure was not associated with disinhibitory behaviors, among adolescents.	PCB	15 18	0	1
31146159	2019	However, the adjusted odds ratio for being a current smoker, was higher in subjects within the third quartile of maternal PCB 66 exposure compared to those below the median (aOR = 1.93; 95% CI 1.05, 3.55).	PCB	122125	0	1
31146159	2019	The adjusted odds ratio for drinking >2 alcoholic beverages per week, were also higher for adolescents within the third (aOR = 1.46; 95% CI 0.86, 2.47) and fourth quartile of PCB 66 exposure (aOR = 1.39; 95% CI 0.83, 2.35), but the differences did not reach statistical significance.	PCB	175178	0	1
31146159	2019	These results suggest that this specific PCB congener may play a role inducing neurodevelopmental alterations that could potentially increase the risk of becoming a long-term user of tobacco and possibly alcohol.	PCB	41 44	0	1
31146160	2019	Behavioural impairment (burrowing kinetic), neurotoxicity (AChE activity), endocrine disruption by alkali-labile phosphate content, oxidative stress (SOD, CAT, GPXs activities), biotransformation (GST activity), oxidative damage (LPO) and genotoxicity (DNA damage) were assessed.	AChE	59 63	1	0
31146160	2019	Behavioural impairment (burrowing kinetic), neurotoxicity (AChE activity), endocrine disruption by alkali-labile phosphate content, oxidative stress (SOD, CAT, GPXs activities), biotransformation (GST activity), oxidative damage (LPO) and genotoxicity (DNA damage) were assessed.	SOD	150153	1	0
31146160	2019	Behavioural impairment (burrowing kinetic), neurotoxicity (AChE activity), endocrine disruption by alkali-labile phosphate content, oxidative stress (SOD, CAT, GPXs activities), biotransformation (GST activity), oxidative damage (LPO) and genotoxicity (DNA damage) were assessed.	GST	197200	1	0
31146160	2019	Moreover, this study also pertained to compare tamoxifen cytotoxicity effects to mussels and targeted human (i.e. immortalized retinal pigment epithelium - RPE; and human transformed endothelial cells - HeLa) cell lines, in a range of concentrations from 0.5 ng L-1 to 50 mug L-1.	RPE	156159	0	1
31146160	2019	In mussels M. galloprovincialis, 100 ng L-1 tamoxifen caused endocrine disruption in males, neurotoxicity, and an induction in GST activity and LPO byproducts in gills, corroborating in genotoxicity over the exposure days.	GST	127130	1	0
31146163	2019	We then linked these daily exposures to counts of respiratory hospitalizations and emergency department visits at the ZIP code level.	ZIP	118121	0	1
31146163	2019	Effect estimates of ozone during the fire period were non-significant for respiratory hospitalizations but were significant for ED visits for asthma (RR = 1.05 and 95% CI = (1.022, 1.078) for a 10 ppb increase in O3).	ppb	197200	0	1
31146163	2019	The significant findings for PM2.5 but not for ozone in mutually-adjusted models is likely due to the fact that PM2.5 levels during these fires exceeded the 24-hour National Ambient Air Quality Standard of 35 mug/m3 for 4976 ZIP-code days and reached levels up to 6.073 times the national ambient air quality standard, whereas our estimated ozone levels during the fire period only occasionally exce…	ppb	452455	0	1
31146168	2019	BACKGROUND: Angiotensin II (Ang II)-induced chronic inflammation and oxidative stress often leads to irreversible vascular injury, in which the endothelial to mesenchymal transition (EndMT) in the endothelial layers are involved.	Ang	28 31	1	0
31146168	2019	HYPOTHESIS/PURPOSE: This study investigated the protective effects and mechanism of Sch B against Ang II-induced vascular injury.	Ang	98101	1	0
31146168	2019	In vitro, Ang II-induced HUVECs injury was used to study the underlying mechanism.	Ang	10 13	1	0
31146168	2019	RESULTS: Pre-administration of Sch B effectively attenuated phenotypes of vascular EndMT and fibrosis in Ang II-treated animals, accompanied with decreased inflammatory cytokine and ROS.	Ang	105108	1	0
31146168	2019	The in vitro data from HUVECs suggest that Sch B directly targets NF-kappaB activation to suppress Ang II-induced EndMT and vascular injury.	Ang	99102	1	0
31146168	2019	Ang II-induced inflammation and oxidative stress also contributed to vascular EndMT development and Sch B inhibited inflammation/ROS-mediated EndMT by suppressing NF-kappaB.	Ang	0 3	1	0
31146168	2019	CONCLUSION: EndMT contributes to vascular injury in Ang II-treated mice, and it can be prevented via suppressing NF-kappaB activation by Sch B treatment.	Ang	52 55	1	0
31146170	2019	They were screened using Screen for Childhood Anxiety Related Emotional Disorders tool and then subjected to confirmatory diagnosis using Mini-International Neuropsychiatric Interview for Children/Adolescent (MINI KID).	KID	214217	0	1
31146171	2019	Then the single polypeptide was tested by MALDI TOF and N-terminal sequence analysis.	TOF	48 51	0	1
31146181	2019	METHODS: 42 fragments of the left ventricular myocardium and circumflex branch of the left coronary artery were obtained from individuals autopsied at the Clinical Hospital of the Federal University of Tri ngulo Mineiro in the period ranging from 1984 to 2018.	Tri	202205	0	1
31146254	2019	These results suggest that, to be effective, fishing regulations need to (i) focus on smaller tuna (i.e., juveniles and young adults), and (ii) mitigate adverse effects of climate change by taking into the account how future environments may affect the population growth.	tuna	94 98	0	1
31146263	2019	Gene set enrichment analysis of TCGA-THCA data suggested coordinated upregulation of genes related to epithelial-mesenchymal transition in PTC with minimal extrathyroid extension.	PTC	139142	0	1
31146277	2019	BACKGROUND Studies have reported that BIS is unreliable in children because its algorithm provides misleading information about the actual depth of anesthesia.	BIS	38 41	0	1
31146277	2019	RESULTS The BIS values in groups 1 to 6 were 52.2 12.7, 55.0 8.0, 44.5 7.3, 43.8 7.3, 44.2 6.2, and 49.1 6.2 respectively.	BIS	12 15	0	1
31146277	2019	Compared with groups 1 and 2 (52.2 12.7, 55.0 8.0), BIS values of groups 3, 4, and 5 (44.5 7.3, 43.8 7.3, 44.2 6.2, respectively) were lower (P<0.05).	BIS	52 55	0	1
31146300	2019	Geriatr Gerontol Int 2019;	Int	17 20	0	1
31146312	2019	Concentrations of n-alkanes, polycyclic aromatic hydrocarbons and petroleum biomarkers (hopanes, terpanes and steranes) were determined, as well as bulk parameters (TOC, grain size and delta13C).	TOC	165168	0	1
31146312	2019	TOC played a fundamental role to the concentration of hydrocarbons, showing similar distributions along the transects.	TOC	0 3	0	1
31146318	2019	Using principal components analysis, we determined that blubber DDTs primarily loaded to the first principal component explaining 81.6% of the total variance in POP exposure, while the remaining persistent organic pollutants primarily loaded to the PC2 (10.4% of variance).	PC2	249252	0	1
31146325	2019	MCEE Mutations in an Adult Patient with Parkinson's Disease, Dementia, Stroke and Elevated Levels of Methylmalonic Acid.	MCEE	0 4	1	0
31146325	2019	Homozygous mutations in the corresponding MCEE gene have been shown in children to cause methylmalonyl-coa epimerase deficiency with isolated MMA-uria and a variable clinical phenotype.	MCEE	42 46	1	0
31146325	2019	Compound heterozygous mutations were identified in the MCEE gene, c.139C>T (p.Arg47X) and c.419delA (p.Lys140fs), of which the latter is novel.	MCEE	55 59	1	0
31146325	2019	To our knowledge, this is the first report of an adult patient with MCEE mutations and MMA-uria, thus adding novel data to the possible phenotypical spectrum of methylmalonyl-coa epimerase deficiency.	MCEE	68 72	1	0
31146328	2019	The ultrasoft (~2 kPa) and adhesive properties of the ternary conductive nanocomposite ensure the capacity of the EES to intimately couple with human skin in order to improve accuracy with a relative error of 3.39% at strain 50% as well as a large strain range (0~50%) and gauge factor (GF ~2.5).	kPa	18 21	0	1
31146328	2019	The millimeter scale EES (~5 mm 1 mm 100 mum), based on the micro-nano fabrication technique, consisted of a two-stage serpentine connector and screen print of the ternary conductive nanocomposite.	mm 1	29 33	0	1
31146330	2019	Time spent in sedentary behavior was significantly lower by 18.3 min/day on average in the intervention class at follow-up (interaction effects: F(1, 36) = 4.95, p = 0.035, eta2 = 0.082).	eta2	173177	0	1
31146332	2019	Imprinting control region mice (8 weeks old, n = 10 per group) were administered MMPP (5 mg/kg) in drinking water for 1 month, and injected with MPTP (15 mg/kg, four times with 2 h intervals) during the last 7 days of treatment.	MPTP	145149	0	1
31146332	2019	Increased activation of signal transducer and activator of transcription 3, p38, and monoamine oxidase B were observed in the substantia nigra and striatum after MPTP injection, effects that were attenuated by MMPP treatment.	p38	76 79	1	0
31146332	2019	Increased activation of signal transducer and activator of transcription 3, p38, and monoamine oxidase B were observed in the substantia nigra and striatum after MPTP injection, effects that were attenuated by MMPP treatment.	MPTP	162166	0	1
31146356	2019	Reduction of Traumatic Brain Damage by Tspo Ligand Etifoxine.	Tspo	39 43	1	0
31146358	2019	Tonic electrodermal features are preserved at a compression ratio = 23.3 while phasic electrodermal features are more prone to reconstruction errors at CRs > 8.8 .	CRs	152155	0	1
31146367	2019	The aim of this study was to examine the formation of double-strand breaks markers (gammaH2AX and phosphorylated kinase ATM, pATM, foci) in human mesenchymal stem cells exposed to chronic gamma-radiation (0.1 mGy/min) in comparison with acute irradiation (30 mGy/min) at cumulative doses of 30, 100, 160, 240 and 300 mGy.	ATM	120123	1	0
31146388	2019	In all the investigated human mesenchymal stem cells, ZF1 decreased senescence-associated beta-galactosidase (SA beta-gal) activity and enhanced the transcription of TERT, encoding the catalytic telomerase core.	TERT	166170	1	0
31146388	2019	In hBM-MSCs, hDP-MSCs, and hWJ-MSCs, TERT over-expression was concomitant with a down-regulation of two repressors of TERT, TP53 (p53), and CDKN1A (p21).	TERT	37 41	1	0
31146388	2019	In hBM-MSCs, hDP-MSCs, and hWJ-MSCs, TERT over-expression was concomitant with a down-regulation of two repressors of TERT, TP53 (p53), and CDKN1A (p21).	TERT	118122	1	0
31146388	2019	In hBM-MSCs, hDP-MSCs, and hWJ-MSCs, TERT over-expression was concomitant with a down-regulation of two repressors of TERT, TP53 (p53), and CDKN1A (p21).	p53	130133	1	0
31146388	2019	In hBM-MSCs, hDP-MSCs, and hWJ-MSCs, TERT over-expression was concomitant with a down-regulation of two repressors of TERT, TP53 (p53), and CDKN1A (p21).	p21	148151	1	0
31146412	2019	For instance, PB strains exhibit less susceptibility to cationic host defense peptides and vancomycin killing under in vivo-like conditions, greater damage to endothelial cells, thicker biofilm formation, altered growth rates, early activation of many global virulence regulons (e.g., sigB, sarA, sae and agr) and higher expression of purine biosynthesis genes (e.g., purF) than resolving bacteremia…	sarA	291295	1	0
31146428	2019	Unlike the other non-celiac wheat sensitivity patients, none of them had a DQ2 and/or DQ8 haplotype.	DQ2	75 78	1	0
31146447	2019	The most common type of MRP was underuse of medication (70.6%).	MRP	24 27	0	1
31146460	2019	In the present study, a total of 37 S. aureus isolates were recovered from leftover food, swabs from a kitchen environment, and patient feces associated with four foodborne outbreaks that occurred in Hangzhou, southeast China, and were characterized by multilocus sequence typing, spa typing, pulse-field gel electrophoresis, and antimicrobial susceptibility.	spa	281284	1	0
31146482	2019	PARP Inhibition Increases the Response to Chemotherapy in Uveal Melanoma.	PARP	0 4	1	0
31146482	2019	Here, we use uveal melanoma patient-derived xenografts to study the therapeutic activity of the PARP inhibitor olaparib, alone or in combination.	PARP	96100	1	0
31146482	2019	First, we show that the expression and the activity of PARP proteins is similar between the patient-derived xenografts and the corresponding patient's tumors.	PARP	55 59	1	0
31146482	2019	We also observed a high increase of phosphorylated YAP and TAZ proteins after dacarbazine + olaparib treatment.	YAP	51 54	1	0
31146482	2019	We also observed a high increase of phosphorylated YAP and TAZ proteins after dacarbazine + olaparib treatment.	TAZ	59 62	1	0
31146482	2019	Our results suggest that PARP inhibition in combination with the alkylating agent dacarbazine could be of clinical interest for uveal melanoma treatment.	PARP	25 29	1	0
31146493	2019	Participants either consumed dextrose in water (placebo), slowly digestible carbohydrates ingredient in water, slowly digestible carbohydrates drink-mix powder reconstituted in skim milk, or control drink-mix reconstituted in skim milk (without SDC).	SDC	245248	0	1
31146513	2019	RESULTS: Cox analysis survival data shows no statically difference in the hazard function of the two groups.	Cox	9 12	0	1
31146518	2019	In comparing surgical route, AH was most commonly associated with CDI (0.6%, p <0.001), SSI (6.0%, P=0.001), and yeast vaginitis (1.9%, p <0.001), while VH was most commonly associated with UTI (8.1%, P=0.002).	UTI	190193	0	1
31146553	2019	We determined the early- to mid-term serum Co and Cr levels after modular dual-mobility components were used in revision and complex primary THAs, and specifically included patients revised for adverse local tissue reactions.	THAs	141145	0	1
31146553	2019	While further studies are required, we support the selective use of a modular dual-mobility construct in revision and complex primary THAs for patients at high risk for instability.	THAs	134138	0	1
31146562	2019	The percentage of THAs that were undertaken between 2002 and 2005 in patients who had previously been treated with a CMN (0.346%) more than doubled between 2012 and 2015 (0.781%).	THAs	18 22	0	1
31146563	2019	A propensity score was developed to minimize bias between groups and utilized age at revision THA, sex, body mass index, American Society of Anesthesiologists score, preoperative anticoagulation, and year of surgery.	THA	94 97	0	1
31146563	2019	RESULTS: Tranexamic acid significantly and substantially reduced the rate of blood transfusions after revision THA overall from 54% to 26% (p < 0.001; adjusted relative risk (RR) 1.6;	THA	111114	0	1
31146592	2019	Nine children with SSD participated in four speech elicitation tasks, varying with respect to ecological validity, and to degree of control: (1) word imitation, (2) picture naming, (3) concurrent commenting of a silent short video, and (4) free conversation.	SSD	19 22	0	1
31146601	2019	Spanish is a free-stress language in which stress patterns are contrastive, especially in verbal forms (e.g. lavo /'labo/ '[I] wash' vs lav /la'bo/ '[He/she] washed').	wash	127131	0	1
31146607	2019	These cases were divided into four groups as histological chorioamnionitis only (HCA, n = 335), clinical and histological chorioamnionitis (HCC, n = 20), clinical chorioamnionitis only (CCA, n = 18) and non-chorioamnionitis control (CON, n = 1999).	HCA	81 84	0	1
31146607	2019	These cases were divided into four groups as histological chorioamnionitis only (HCA, n = 335), clinical and histological chorioamnionitis (HCC, n = 20), clinical chorioamnionitis only (CCA, n = 18) and non-chorioamnionitis control (CON, n = 1999).	HCC	140143	0	1
31146607	2019	These cases were divided into four groups as histological chorioamnionitis only (HCA, n = 335), clinical and histological chorioamnionitis (HCC, n = 20), clinical chorioamnionitis only (CCA, n = 18) and non-chorioamnionitis control (CON, n = 1999).	CCA	186189	0	1
31146612	2019	Conclusions: Microperimetry is a valuable tool for monitoring functional aspects of central retina in an individual patient, especially in combination with other modalities such as OCT, autofluorescence, and acuity and thus may contribute to evaluating the efficacy of gene treatments.	OCT	181184	0	1
31146639	2019	The historical derivation of current operational definitions of uncomplicated concussive brain injury based on acute injury variables especially posttraumatic amnesia vs. symptom presence (no PTA) are reviewed.	PTA	192195	0	1
31146647	2019	Immunomodulation was assessed by measuring serum IgG anti-platelet antibody levels;	IgG	49 52	1	0
31146647	2019	TPO-RA-treated mice had significantly reduced IgG anti-platelet antibodies despite the increasing platelet counts.	IgG	46 49	1	0
31146650	2019	Characterization of the IVS-II-821 (A>C) (HBB: c.316-30A>C) Mutation in a beta-Thalassemia Phenotype in Iran.	HBB	42 45	1	0
31146650	2019	In this study, we identified a mid-intronic mutation at IVS-II-821 (A>C) (HBB: c.316-30A>C) position in the HBB gene of an Iranian proband and two of her siblings that was associated with beta-thalassemia clinical features.	HBB	74 77	1	0
31146650	2019	In this study, we identified a mid-intronic mutation at IVS-II-821 (A>C) (HBB: c.316-30A>C) position in the HBB gene of an Iranian proband and two of her siblings that was associated with beta-thalassemia clinical features.	HBB	108111	0	1
31146673	2019	BACKGROUND: Migraine aura is a common and disabling neurological condition, characterized by transient visual, and less frequently sensory and dysphasic aura disturbances.	aura	153157	0	1
31146673	2019	MAIN BODY: A systematic review of previous prospective and retrospective systematic recordings of visual aura symptoms was performed to provide an overview of the different types of visual phenomena occurring during migraine aura and their respective frequencies in patients.	aura	105109	0	1
31146673	2019	We found 11 retrospective studies and three prospective studies systematically describing visual aura symptoms.	aura	97101	0	1
31146673	2019	The number of different types of visual aura symptoms reported by patients in the studies ranged from two to 23.	aura	40 44	0	1
31146688	2019	We performed a cross-sectional evaluation of the association between net endogenous acid production, estimated as dietary protein to potassium content ratio, and the presence of high normoalbuminuria (ACR: 1.13-3.38 mg/mmol) or microalbuminuria.	ACR	201204	0	1
31146694	2019	The goal of this study is to measure circulating bone morphogenetic protein9 concentrations in patients with essential hypertension, coronary heart disease and HTN + CHD, and evaluates the relationship between circulating bone morphogenetic protein9 and these cardiovascular diseases.	CHD	166169	0	1
31146694	2019	Circulating bone morphogenetic protein9 correlated negatively with SBP, FIns and HOMA-IR in hypertension patients and correlated negatively with FBG and 2 h-BG in coronary heart disease patients.	SBP	67 70	0	1
31146717	2019	Biomarker subgroups included HER2 and HER3 mRNA expression levels ( median vs. >median), HER2 staining intensity (IHC 3+ vs. 2+ vs. 0/1+), PIK3CA status (mutated vs. non-mutated), PTEN H-score ( median vs. >median), and PTEN protein expression level (0 vs. 1+ vs. 2+ vs. 3+ vs. 4+).	PTEN	180184	1	0
31146717	2019	Biomarker subgroups included HER2 and HER3 mRNA expression levels ( median vs. >median), HER2 staining intensity (IHC 3+ vs. 2+ vs. 0/1+), PIK3CA status (mutated vs. non-mutated), PTEN H-score ( median vs. >median), and PTEN protein expression level (0 vs. 1+ vs. 2+ vs. 3+ vs. 4+).	PTEN	220224	1	0
31146720	2019	Of note was a 10-fold lower expression of B2M in the transfected cells.	B2M	42 45	1	0
31146720	2019	Low B2M was also characteristic of LuCaP 145.1.	B2M	4 7	1	0
31146720	2019	Conversely, B2M was increased when stem cells were induced to differentiate.	B2M	12 15	1	0
31146728	2019	CASE PRESENTATION: We report a rare case of a unicornuate right uterus with rudimentary non-communicating (functional) cavitary left horn (class U4a) in a 17-year-old girl who was diagnosed with VACTERL association.	U4a	145148	0	1
31146729	2019	Residence, ANC follow-up, and presence of companion during labor or delivery were found to have a significant association with the perceived quality of basic emergency obstetric and newborn care services.	ANC	11 14	0	1
31146731	2019	App features were devised by this expert panel to support urine monitoring and other home care tasks.	App	0 3	0	1
31146731	2019	The app prototype was then refined based on two rounds of usability testing and semi-structured user interviews with a total of 20 caregivers and adolescent patients.	app	4 7	0	1
31146739	2019	Mobile applications for pain management: an app analysis for clinical usage.	app	44 47	0	1
31146739	2019	The purpose of this study is to qualitatively evaluate the content and functionality of mobile pain management apps.	apps	111115	0	1
31146739	2019	METHODS: The Apple App Store and the Google Play Store were searched to identify pain management apps.	App	19 22	0	1
31146739	2019	METHODS: The Apple App Store and the Google Play Store were searched to identify pain management apps.	apps	97101	0	1
31146739	2019	The inclusion criteria were as follows: (1) that apps include a pain diary function allowing users to record pain episodes, (2) are available in either Apple App Store or Google Play Store, and (3) are available in the English language.	apps	49 53	0	1
31146739	2019	The inclusion criteria were as follows: (1) that apps include a pain diary function allowing users to record pain episodes, (2) are available in either Apple App Store or Google Play Store, and (3) are available in the English language.	App	158161	0	1
31146739	2019	We excluded apps if they were limited to only specific forms of pain or specific diseases.	apps	12 16	0	1
31146739	2019	RESULTS: A total of 36 apps met the inclusion criteria.	apps	23 27	0	1
31146739	2019	Most of the apps served as pain diary tools to record the key characteristics of pain.	apps	12 16	0	1
31146739	2019	The pain diary features of the apps were grouped into nine categories: the recordings of pain intensity, pain location, pain quality, pain's impacts on daily life, other features of pain, other related symptoms, medication, patients' habits and basic information, and other miscellaneous functions.	apps	31 35	0	1
31146739	2019	The apps displayed various problems in use.	apps	4 8	0	1
31146739	2019	The problem of not involving healthcare professionals in app development has not been resolved.	app	57 60	0	1
31146739	2019	Approximately 31% of apps including a pain diary function engaged clinicians in app development.	apps	21 25	0	1
31146739	2019	Approximately 31% of apps including a pain diary function engaged clinicians in app development.	app	80 83	0	1
31146739	2019	Only one third of the apps supported the cross-platforms, none of the apps supported clinician access to graphical pain data visualization, none secured HIPAA compliance, and none endorsed the PEG tool for primary care physicians' chronic pain management.	apps	22 26	0	1
31146739	2019	Only one third of the apps supported the cross-platforms, none of the apps supported clinician access to graphical pain data visualization, none secured HIPAA compliance, and none endorsed the PEG tool for primary care physicians' chronic pain management.	apps	70 74	0	1
31146739	2019	CONCLUSIONS: Most of the 36 pain management apps demonstrated various problems including user interface and security.	apps	44 48	0	1
31146739	2019	Many apps lacked clinician and end-user involvement in app development impacting the clinical utility of these apps.	apps	5 9	0	1
31146739	2019	Many apps lacked clinician and end-user involvement in app development impacting the clinical utility of these apps.	app	55 58	0	1
31146739	2019	Many apps lacked clinician and end-user involvement in app development impacting the clinical utility of these apps.	apps	111115	0	1
31146739	2019	We could not find any pain apps suitable for clinical usage despite high demand from clinicians due to the US opioid crisis.	apps	27 31	0	1
31146755	2019	To do so, we developed a bioinformatic toolkit that includes BLAST databases, hidden Markov models and resources for gene-targeted assembly of nine arsenic resistance and metabolism genes: acr3, aioA, arsB, arsC (grx), arsC (trx), arsD, arsM, arrA, and arxA.	arsB	201205	1	0
31146755	2019	To do so, we developed a bioinformatic toolkit that includes BLAST databases, hidden Markov models and resources for gene-targeted assembly of nine arsenic resistance and metabolism genes: acr3, aioA, arsB, arsC (grx), arsC (trx), arsD, arsM, arrA, and arxA.	arsC	207211	1	0
31146755	2019	To do so, we developed a bioinformatic toolkit that includes BLAST databases, hidden Markov models and resources for gene-targeted assembly of nine arsenic resistance and metabolism genes: acr3, aioA, arsB, arsC (grx), arsC (trx), arsD, arsM, arrA, and arxA.	grx	213216	1	0
31146755	2019	To do so, we developed a bioinformatic toolkit that includes BLAST databases, hidden Markov models and resources for gene-targeted assembly of nine arsenic resistance and metabolism genes: acr3, aioA, arsB, arsC (grx), arsC (trx), arsD, arsM, arrA, and arxA.	arsC	219223	1	0
31146755	2019	To do so, we developed a bioinformatic toolkit that includes BLAST databases, hidden Markov models and resources for gene-targeted assembly of nine arsenic resistance and metabolism genes: acr3, aioA, arsB, arsC (grx), arsC (trx), arsD, arsM, arrA, and arxA.	trx	225228	1	0
31146755	2019	To do so, we developed a bioinformatic toolkit that includes BLAST databases, hidden Markov models and resources for gene-targeted assembly of nine arsenic resistance and metabolism genes: acr3, aioA, arsB, arsC (grx), arsC (trx), arsD, arsM, arrA, and arxA.	arsD	231235	1	0
31146767	2019	When medical and psychological support is not able to force parents to accept a child suffering from genital ambiguity, we think that it is better to opt for reversible medical/surgical treatments rather than allowing patients to grow up within a family that does not accept them.	opt	150153	0	1
31146769	2019	METHODS: We performed a cross-sectional mail-out written survey of a random sample of 300 FPs in active practice in the Greater Toronto Area (Markham and Brampton).	FPs	90 93	0	1
31146769	2019	The effective response rate was 19.9, 95% confidence interval 15.7, 24.9% (58/291), after excluding 6 FPs that reported TN evaluation was outside their scope of practice and three FPs with an invalid mailing address.	FPs	102105	0	1
31146769	2019	The effective response rate was 19.9, 95% confidence interval 15.7, 24.9% (58/291), after excluding 6 FPs that reported TN evaluation was outside their scope of practice and three FPs with an invalid mailing address.	FPs	180183	0	1
31146769	2019	All FPs reported easy access to thyroid ultrasound .	FPs	4 7	0	1
31146769	2019	About half of FPs were concerned about overdiagnosis of thyroid cancer and most did not believe that there was any thyroid cancer survival advantage with routine screening thyroid ultrasound.	FPs	14 17	0	1
31146769	2019	Although appropriate indications for thyroid ultrasound were endorsed by most respondents (e.g. palpable TN, incidental TN on other imaging), inappropriate recommendations were observed in a third of FPs (19/57) who recommended thyroid ultrasound for abnormal thyroid blood tests about half of FPs (30/56) who endorsed biopsy of sub-centimeter nodules.	FPs	200203	0	1
31146769	2019	Although appropriate indications for thyroid ultrasound were endorsed by most respondents (e.g. palpable TN, incidental TN on other imaging), inappropriate recommendations were observed in a third of FPs (19/57) who recommended thyroid ultrasound for abnormal thyroid blood tests about half of FPs (30/56) who endorsed biopsy of sub-centimeter nodules.	FPs	294297	0	1
31146769	2019	About half of FPs (31/58) reported that their patients sometimes request medically unnecessary thyroid ultrasound.	FPs	14 17	0	1
31146772	2019	Treatment will utilize eight main acupoints (GV20, GV24, GV29, RN6, RN4, SP6, HT7, EX-HN22) and extra two acupoints based on syndrome differentiation.	SP6	73 76	0	1
31146772	2019	The secondary outcomes will be measured by sleep parameters recorded in the Actigraphy (SE, TST, SA), Insomnia Severity Index, Self-Rating Anxiety Scale, Self-Rating Depression Scale, and Menopause Quality of Life .	TST	92 95	0	1
31146774	2019	The acupuncture group will receive acupuncture treatment at nine acupuncture points (GV20, EX-HN1, bilateral LI4, and ST36) twice a week for 12 weeks.	LI4	109112	0	1
31146784	2019	Secretion of VEGF in the insert grown bilayer was significantly higher (22 pg/ml) than hCEC monolayer (3 pg/ml).	VEGF	13 17	1	0
31146784	2019	To mimic the disease condition the model was treated with 100 ng/ml of VEGF, which increased the permeability of bilayer for 20 kDa FITC dextran while addition of bevacizumab, a humanized anti-VEGF drug, reversed the effect.	VEGF	71 75	1	0
31146894	2019	The expression of hippocampal synaptophysin, glutamate receptor-1, GFAP and striatal tyrosine-hydroxylase were also reduced in the high fat diet groups.	GFAP	67 71	1	0
31146894	2019	While treatment did not alter tissue IGF-1, cyclic glycine-proline administration that increased the concentration of cyclic glycine-proline in brain tissues, normalized the expression of synaptophysin, GFAP and tyrosine-hydroxylase, but not glutamate receptor-1.	GFAP	203207	1	0
31146896	2019	A few months after the start of treatment, multiple nevi were noted on the 4 limbs, and in particular on the right palm.	palm	115119	0	1
31146896	2019	After 1.5 months, she reported the outbreak of various pigmented lesions 2-3mm in diameter on the trunk and one lesion on her right palm.	palm	132136	0	1
31146935	2019	This was followed by anterior vitrectomy and implantation of 1-piece intraocular lens in the capsular bag.	bag	102105	0	1
31146974	2019	Then, expression profiles of the candidate miRNAs were firstly analyzed in 43 pairs of serum samples from the training set by quantitative real-time PCR, and the dysregulated miRNA along with three tumor markers (carcinoembryonic antigen, CEA; cytokeratin 19 fragment, CYFRA21-1; squamous cell carcinoma antigen, SCCA) were further validated in two independent cohorts, which consisted of training s…	CEA	239242	1	0
31146974	2019	Then, expression profiles of the candidate miRNAs were firstly analyzed in 43 pairs of serum samples from the training set by quantitative real-time PCR, and the dysregulated miRNA along with three tumor markers (carcinoembryonic antigen, CEA; cytokeratin 19 fragment, CYFRA21-1; squamous cell carcinoma antigen, SCCA) were further validated in two independent cohorts, which consisted of training s…	SCCA	313317	1	0
31146974	2019	In conclusion, the newly developed diagnostic panel consisting of exosomal miR-17-5p, CEA, CYFRA21-1 and SCCA may have considerable clinical value in the diagnosis of non-small cell lung cancer.	CEA	86 89	1	0
31146974	2019	In conclusion, the newly developed diagnostic panel consisting of exosomal miR-17-5p, CEA, CYFRA21-1 and SCCA may have considerable clinical value in the diagnosis of non-small cell lung cancer.	SCCA	105109	1	0
31146989	2019	RESULTS: The dynamic elastic modulus was lower for UF (78.1 GPa for UF vs. 92.2 GPa for IF) as well as the static elastic modulus (71.0 GPa for UF vs. 84.5 GPa for IF).	GPa	60 63	0	1
31146989	2019	RESULTS: The dynamic elastic modulus was lower for UF (78.1 GPa for UF vs. 92.2 GPa for IF) as well as the static elastic modulus (71.0 GPa for UF vs. 84.5 GPa for IF).	GPa	80 83	0	1
31146989	2019	RESULTS: The dynamic elastic modulus was lower for UF (78.1 GPa for UF vs. 92.2 GPa for IF) as well as the static elastic modulus (71.0 GPa for UF vs. 84.5 GPa for IF).	GPa	136139	0	1
31146989	2019	RESULTS: The dynamic elastic modulus was lower for UF (78.1 GPa for UF vs. 92.2 GPa for IF) as well as the static elastic modulus (71.0 GPa for UF vs. 84.5 GPa for IF).	GPa	156159	0	1
31147008	2019	Targeting human brain cancer stem cells by curcumin-loaded nanoparticles grafted with anti-aldehyde dehydrogenase and sialic acid: Colocalization of ALDH and CD44.	CD44	158162	1	0
31147008	2019	ALDH was colocalized with CD44 in U87MG cells and brain cancer stem cells.	CD44	26 30	1	0
31147017	2019	The fabricated H-TiO2 coating possessed excellent and controllable photothermal effect in inhibiting the tumor growth under 808 nm NIR laser irradiation in vitro and in vivo.	NIR	131134	0	1
31147028	2019	Incubation of MCF-7 cells with bPEI-DMA at tumor acidic pHs led to leakage of lactate dehydrogenase from the cells.	pHs	56 59	0	1
31147028	2019	Sequential incubation of bPEI-DMA and doxorubicin with MCF-7 cells at tumor acidic pHs caused enhanced uptake of doxorubicin by the cells.	pHs	83 86	0	1
31147044	2019	Filters with high filtration efficiency ( 100%) and high-quality factor ( 0.05 Pa-1) were obtained even adding different concentrations of Ag nanoparticles to PAN nanofibers.	Pa-1	79 83	0	1
31147047	2019	Maximal secretion was observed when MSCs were seeded on hydrogel matrices of 5.0 kPa stiffness.	kPa	81 84	0	1
31147055	2019	The synthesis of nickel oxide nanoparticles (NiO NPs) and graphene/nickel oxide nanocomposites (Gr/NiO NCs) was performed using a simple chemical reduction method.	NPs	49 52	0	1
31147055	2019	Powder X-ray diffraction and thermogravimetric analysis were used to examine the crystalline nature and thermal stability of the synthesized NiO NPs and Gr/NiO NCs, respectively.	NPs	145148	0	1
31147055	2019	Scanning electron microscopy and transmission electron microscopy were utilized to observe the morphology of NiO NPs and Gr/NiO NCs and estimate their size range.	NPs	113116	0	1
31147055	2019	Transmission electron microscopy suggested that the NiO NPs were speared onto the surface of Gr nanosheet.	NPs	56 59	0	1
31147055	2019	The efficiency of NiO NPs and Gr/NiO NCs against extended spectrum beta-lacamase producing bacteria, which was confirmed by specific HEXA disc Hexa G-minus 24 (HX-096) and minimal inhibitory concentration strip methods (CLSI);	NPs	22 25	0	1
31147055	2019	The efficiency of NiO NPs and Gr/NiO NCs against extended spectrum beta-lacamase producing bacteria, which was confirmed by specific HEXA disc Hexa G-minus 24 (HX-096) and minimal inhibitory concentration strip methods (CLSI);	HEXA	133137	0	1
31147055	2019	The efficiency of NiO NPs and Gr/NiO NCs against extended spectrum beta-lacamase producing bacteria, which was confirmed by specific HEXA disc Hexa G-minus 24 (HX-096) and minimal inhibitory concentration strip methods (CLSI);	Hexa	143147	0	1
31147055	2019	Minimal inhibitory concentration results suggested that the NiO NPs and Gr/NiO NCs possess maximum growth inhibition of 86%, 82% and 94%, 92% at 50 and 30 mug/mL concentrations, respectively.	NPs	64 67	0	1
31147055	2019	The cytotoxicity of NiO NPs and Gr/NiO NCs was quantified against A549 human lung cancer cells.	NPs	24 27	0	1
31147055	2019	Cell death percentage values of 52% at 50 mug/mL against NiO NPs and 54% at 20 mug/mL against Gr/NiO NCs were obtained, respectively.	NPs	61 64	0	1
31147086	2019	Analyses revealed a significant main effect for speaker group, such that raters assigned more pejorative attributes to children with a disorder (ADHD = SLI < typical neurodevelopment and ADHD < SLI < TN) across all dimensions.	SLI	152155	0	1
31147086	2019	Analyses revealed a significant main effect for speaker group, such that raters assigned more pejorative attributes to children with a disorder (ADHD = SLI < typical neurodevelopment and ADHD < SLI < TN) across all dimensions.	SLI	194197	0	1
31147102	2019	We used Cox hazards models to determine the adjusted association between emergency department disposition decision and the outcomes among patients who were stratified into low- and increased-risk categories.	Cox	8 11	0	1
31147183	2019	METHODS: Trauma patients who underwent pre-hospital CPR were identified from the registries of two level-1 trauma centers.	CPR	52 55	0	1
31147183	2019	RESULTS: Among 277 patients who underwent pre-hospital CPR, 110 patients had PEA on arrival to ED.	CPR	55 58	0	1
31147183	2019	Median CPR duration was 20.0 and 8.0 min for pre-hospital and ED, respectively.	CPR	7 10	0	1
31147186	2019	To facilitate clinical photography at our Major Trauma Centre institution, a smartphone-based Secure Clinical Image Transfer app was introduced and integrated with the existing clinical photography database to allow clinicians to take photographs, which are saved directly to patient records.	app	125128	0	1
31147186	2019	OBJECTIVES: To compare rates of information governance -compliant clinical photography of wounds of patients with open fractures before and after introduction of departmental smartphones loaded with the clinical photography app secure clinical image transfer.	app	224227	0	1
31147202	2019	The subject-specific three-dimensional (3D) and two-dimensional (2D) finite element models of T12 were generated from the HR-pQCT scanner and the simulated DXA images, respectively.	T12	94 97	0	1
31147202	2019	Additionally, the areal bone mineral density and areal bone mineral content of T12 were calculated.	T12	79 82	0	1
31147203	2019	Hence, an adult cadaveric leg was scanned 10 times at four different tube charges (150, 75, 50 and 20 mAs) with a Philips Brilliance 64 computed tomography scanner.	mAs	102105	0	1
31147203	2019	Precision of detecting bone and marker position at 50 mAs was not significantly different from 75 mAs and from the clinically used 150 mAs, but higher than 20 mAs.	mAs	54 57	0	1
31147203	2019	Precision of detecting bone and marker position at 50 mAs was not significantly different from 75 mAs and from the clinically used 150 mAs, but higher than 20 mAs.	mAs	98101	0	1
31147203	2019	Precision of detecting bone and marker position at 50 mAs was not significantly different from 75 mAs and from the clinically used 150 mAs, but higher than 20 mAs.	mAs	135138	0	1
31147203	2019	Precision of detecting bone and marker position at 50 mAs was not significantly different from 75 mAs and from the clinically used 150 mAs, but higher than 20 mAs.	mAs	159162	0	1
31147232	2019	Clinical relevance of BRAF status in glial and glioneuronal tumors: A systematic review.	BRAF	22 26	1	0
31147232	2019	Alterations in the BRAF gene have been reported to play a key role in the tumorigenesis of various tumors.	BRAF	19 23	1	0
31147232	2019	Recent studies have shown the existence of BRAF alterations in ganglioglioma (GG), pilocytic astrocytoma, pleomorphic xanthoastrocytomas, and epithelioid glioblastoma .	BRAF	43 47	1	0
31147232	2019	The focus of this review was the association between the clinical characteristics and BRAF status in these glial and glioneuronal tumors.	BRAF	86 90	1	0
31147232	2019	The BRAF abnormalities, KIAA1549-BRAF fusion and BRAF mutation, were detected in approximately 50% of the analyzed tumors regardless of the tumor location, and there were site-specific BRAF abnormalities that became more remarkable on analysis by each tumor subtype.	BRAF	4 8	1	0
31147232	2019	The BRAF abnormalities, KIAA1549-BRAF fusion and BRAF mutation, were detected in approximately 50% of the analyzed tumors regardless of the tumor location, and there were site-specific BRAF abnormalities that became more remarkable on analysis by each tumor subtype.	BRAF	49 53	1	0
31147232	2019	The BRAF abnormalities, KIAA1549-BRAF fusion and BRAF mutation, were detected in approximately 50% of the analyzed tumors regardless of the tumor location, and there were site-specific BRAF abnormalities that became more remarkable on analysis by each tumor subtype.	BRAF	185189	1	0
31147232	2019	The median age of patients with KIAA1549-BRAF fusion was much lesser than that of those with BRAF mutations.	BRAF	93 97	1	0
31147232	2019	The review of imaging features indicated that cyst formation is associated with the existence of KIAA1549-BRAF fusion in pilocytic astrocytoma and GG and the lack of BRAF mutation in GG.	BRAF	166170	1	0
31147232	2019	Hemorrhage was significantly present in cases of GG with KIAA1549-BRAF fusion, but no relevance was shown in cases with BRAF mutations.	BRAF	120124	1	0
31147232	2019	No significant relevance was detected between the presence of calcification and BRAF alterations.	BRAF	80 84	1	0
31147241	2019	Embolization with a vascular plug (microvascular plug or AVP) with or without coils had a statistically significant lower persistence rate (5.4%) than embolization with coils alone (46.7%) (P = .022).	AVP	57 60	0	1
31147270	2019	To determine which assay was useful for predicting the successful outcome of cord blood transplantation, CBs were grouped according to the temperature (4 C, 24 C, and 37 C) and time (24, 48, and 72 h) after collection.	CBs	105108	0	1
31147308	2019	IVUS subset analysis revealed a non-significant reduction in mean lumen area (6.17 1.28 mm2 vs. 5.47 1.50 mm2; p=0.21) and minimum lumen area (5.14 1.19 mm2 vs. 4.05 1.42 mm2; p=0.10) at two years compared to post-procedural measurements.	mm2	88 91	0	1
31147308	2019	IVUS subset analysis revealed a non-significant reduction in mean lumen area (6.17 1.28 mm2 vs. 5.47 1.50 mm2; p=0.21) and minimum lumen area (5.14 1.19 mm2 vs. 4.05 1.42 mm2; p=0.10) at two years compared to post-procedural measurements.	mm2	106109	0	1
31147308	2019	IVUS subset analysis revealed a non-significant reduction in mean lumen area (6.17 1.28 mm2 vs. 5.47 1.50 mm2; p=0.21) and minimum lumen area (5.14 1.19 mm2 vs. 4.05 1.42 mm2; p=0.10) at two years compared to post-procedural measurements.	mm2	153156	0	1
31147308	2019	IVUS subset analysis revealed a non-significant reduction in mean lumen area (6.17 1.28 mm2 vs. 5.47 1.50 mm2; p=0.21) and minimum lumen area (5.14 1.19 mm2 vs. 4.05 1.42 mm2; p=0.10) at two years compared to post-procedural measurements.	mm2	171174	0	1
31147308	2019	OCT subset analysis demonstrated 99.24 2.27% neointimal strut coverage.	OCT	0 3	0	1
31147318	2019	In 2016/2017, compared with the first week of life, weekly IBI incidence was 92% lower at 8 weeks (incidence rate ratio 0.08; 95% CI 0.06 to 0.10) and 96% lower at 16 weeks of age (IRR 0.04; 95% CI 0.03 to 0.06).	IRR	181184	0	1
31147386	2019	Davis, Dan Wang, Bayardo Garay, Tanya Singh, Laure Verret, Jorge J.	Dan	7 10	0	1
31147392	2019	Moreover, injection of simvastatin does not reduce AGS in the Fmr1-/y mouse, while lovastatin significantly reduces AGS incidence and severity versus vehicle-treated animals.	AGS	51 54	0	1
31147392	2019	Moreover, injection of simvastatin does not reduce AGS in the Fmr1-/y mouse, while lovastatin significantly reduces AGS incidence and severity versus vehicle-treated animals.	AGS	116119	0	1
31147411	2019	At 33+0 week of gestation fetal ultrasound demonstrated that she had a large mitral insufficiency, decreased movement of the lateral cusp of the mitral valve and dilated left atrium.	cusp	133137	0	1
31147461	2019	We present cryoelectron tomography structures of IgM, C1, and C4b complexes formed on antigen-bearing lipid membranes by normal human serum at 4 C.	C4b	62 65	1	0
31147461	2019	The IgM-C1-C4b complexes revealed C4b product release as the temperature-limiting step in complement activation.	C4b	34 37	1	0
31147461	2019	Both IgM hexamers and pentamers adopted hexagonal, dome-shaped structures with Fab pairs, dimerized by hinge domains, bound to surface antigens that support a platform of Fc regions.	Fab	79 82	1	0
31147461	2019	C1 binds IgM through widely spread C1q-collagen helices, with C1r proteases pointing outward and C1s bending downward and interacting with surface-attached C4b, which further interacts with the adjacent IgM-Fab2 and globular C1q-recognition unit.	C1r	62 65	1	0
31147461	2019	C1 binds IgM through widely spread C1q-collagen helices, with C1r proteases pointing outward and C1s bending downward and interacting with surface-attached C4b, which further interacts with the adjacent IgM-Fab2 and globular C1q-recognition unit.	C4b	156159	1	0
31147461	2019	Based on these data, we present mechanistic models for antibody-mediated, C1q-transmitted activation of C1 and for C4b deposition, while further conformational rearrangements are required to form C3 convertases.	C4b	115118	1	0
31147493	2019	URI is required to maintain intestinal architecture during ionizing radiation.	URI	0 3	1	0
31147493	2019	We show that high-dose irradiation increases unconventional prefoldin RPB5 interactor (URI) levels in mouse intestinal crypt, but organ regeneration correlates with URI reductions.	URI	165168	1	0
31147493	2019	URI overexpression in intestine protects mice from radiation-induced gastrointestinal syndrome, whereas halving URI expression sensitizes mice to ionizing radiation.	URI	0 3	1	0
31147493	2019	URI overexpression in intestine protects mice from radiation-induced gastrointestinal syndrome, whereas halving URI expression sensitizes mice to ionizing radiation.	URI	112115	1	0
31147493	2019	URI specifically inhibits beta-catenin in stem cell-like label-retaining cells, which are essential for organ regeneration after ionizing radiation.	URI	0 3	1	0
31147493	2019	URI reduction activates beta-catenin-induced c-MYC expression, causing proliferation of and DNA damage to label-retaining cells, rendering them radiosensitive.	URI	0 3	1	0
31147493	2019	Therefore, URI labels label-retaining cells which promote tissue regeneration in response to high-dose irradiation, and c-MYC inhibitors could be countermeasures for humans at risk of developing gastrointestinal syndrome.	URI	11 14	1	0
31147532	2019	MATERIAL AND METHODS poly-epsilon-caprolactone scaffolds were prepared by 3D printing with a well-designed CAD digital model, then modified by polydopamine coating to produce PCL-polydopamine scaffolds.	CAD	107110	0	1
31147681	2019	Effect of sodium ions on conformations of the cytoplasmic loop of the PomA stator protein of Vibrio alginolyticus.	PomA	70 74	1	0
31147681	2019	The sodium driven flagellar stator of Vibrio alginolyticus is a hetero-hexamer membrane complex composed of PomA and PomB, and acts as a sodium ion channel.	PomA	108112	1	0
31147681	2019	The conformational change in the cytoplasmic region of PomA for the flagellar torque generation, which interacts directly with a rotor protein, FliG, remains a mystery.	PomA	55 59	1	0
31147681	2019	In this study, we introduced cysteine mutations into cytoplasmic charged residues of PomA, which are highly conserved and interact with FliG, to detect the conformational change by the reactivity of biotin maleimide.	PomA	85 89	1	0
31147681	2019	In vivo labeling experiments of the PomA mutants revealed that the accessibility of biotin maleimide at position of E96 was reduced with sodium ions.	PomA	36 40	1	0
31147681	2019	This sodium ions specific reduction was also detected in Escherichia coli that produced PomA and PomB from a plasmid, but not in the purified stator complex.	PomA	88 92	1	0
31147742	2019	To study the relationship between IL-33 and autophagy, mice were pretreated with rapamycin (RAPA; a promoter of autophagy) and 3-methyladenine (3-MA; an inhibitor of autophagy) prior to lipopolysaccharide administration.	RAPA	92 96	0	1
31147742	2019	Th1 cytokines/chemokine levels were significantly increased in serum and bronchoalveolar lavage fluid, while Th2 cytokine levels changed only a little.	Th1	0 3	0	1
31147742	2019	The levels of IL-33 in serum and bronchoalveolar lavage fluid of the RAPA group was significantly increased after lipopolysaccharide was injected as compared with the lipopolysaccharide group;	RAPA	69 73	0	1
31147743	2019	The levels of proinflammatory cytokines (TNF-alpha and IL-6) in colonic tissue and serum were reduced significantly and in GAL + DSS-treated group relative to dextran sulfate sodium alone treated group.	GAL	123126	0	1
31147743	2019	Increased levels of anti-inflammatory cytokine (IL-10) was detected in colon tissues in GAL + DSS-treated groups relative to dextran sulfate sodium alone treated group.	GAL	88 91	0	1
31147743	2019	We also observed decreased levels of myeloperoxidase, nitrites and TBARS with increased SOD in colonic tissue of GAL + dextran sulfate sodium group.	SOD	88 91	1	0
31147743	2019	We also observed decreased levels of myeloperoxidase, nitrites and TBARS with increased SOD in colonic tissue of GAL + dextran sulfate sodium group.	GAL	113116	0	1
31147743	2019	Besides, GAL + DSS-treated animals significantly suppressed protein expressions of p-NF-kappaB and p-Ikk-betaalpha, COX-2, iNOS, Nrf2 and increased HO-1 levels in colon tissues by inhibiting inflammation and oxidative stress.	GAL	9 12	0	1
31147743	2019	Besides, GAL + DSS-treated animals significantly suppressed protein expressions of p-NF-kappaB and p-Ikk-betaalpha, COX-2, iNOS, Nrf2 and increased HO-1 levels in colon tissues by inhibiting inflammation and oxidative stress.	iNOS	123127	1	0
31147751	2019	However, SBP was directly related to certain microbial genera and glycine-conjugated metabolites in chronic kidney disease rats.	SBP	9 12	0	1
31147757	2019	It was observed that the combined deletion of the genes adhE, adhP, mhpF, ldhA, and pta abolished the anaerobic growth using sucrose.	adhE	56 60	1	0
31147757	2019	It was observed that the combined deletion of the genes adhE, adhP, mhpF, ldhA, and pta abolished the anaerobic growth using sucrose.	adhP	62 66	1	0
31147757	2019	It was observed that the combined deletion of the genes adhE, adhP, mhpF, ldhA, and pta abolished the anaerobic growth using sucrose.	mhpF	68 72	1	0
31147757	2019	It was observed that the combined deletion of the genes adhE, adhP, mhpF, ldhA, and pta abolished the anaerobic growth using sucrose.	ldhA	74 78	1	0
31147766	2019	An analysis using Bayesian coalescent methods indicated that the current rabies virus strains in China may come from a common ancestor about 400 years ago, and currently, China is amid the second event of increasing rabies virus population since the 1950s, but the population has decreased gradually.	amid	180184	0	1
31147798	2019	In group 1, serum concentration of leptin was associated with female gender (beta = 0.41, p < 0.0001) and BMI (beta = 0.6, p = 0.012), whereas in group 2, a positive association was shown between leptin levels and BMI (beta = 0.7, p = 0.003) and CRP (beta = 0.35, p = 0.012).	CRP	246249	1	0
31147798	2019	Further, a positive association between leptin levels and BMI and CRP was found in psoriatic arthritis sine psoriasis patients.	CRP	66 69	1	0
31147825	2019	Overall survival and recurrence-free survival were analyzed by Kaplan-Meier plots and multivariable Cox regression conducted separately for UICC stages I-III, tumor location, and sex as well as by propensity score matching followed by univariable and multivariable survival analysis.	Cox	100103	0	1
31147825	2019	The 5-year overall survival rate in the laparoscopic group was 82.6%, vs. 76.6% in the open surgery group, with a hazard ratio of 0.819 in multivariable Cox regression (95% CI 0.747-0.899, p < 0.001).	Cox	153156	0	1
31147826	2019	Afterwards, flap of lower lip and chin were zoned by software appropriate to the trocars routes.	chin	34 38	0	1
31147826	2019	Trocars affect mimetic muscles in the perioral, chin and submental regions in different ways.	chin	48 52	0	1
31147826	2019	CONCLUSIONS: The surgical anatomy of the perioral, chin and submental regions for the initial transoral endoscopic thyroidectomy vestibular approach steps has been defined.	chin	51 55	0	1
31147828	2019	MAIN CONCLUSION: The grapevine Vvbetavacuolar processing enzyme promoter is specifically expressed in the seed.	MAIN	0 4	0	1
31147843	2019	Comparative phylogeny revealed the concurrent circulation of avulaviruses representing different sub-genotypes such as VIg, VIm, VIIa, VIIb, VIIe, VIIf, VIIi, XIIIb and XIIId.	VIm	124127	0	1
31147846	2019	METHODS: We systematically searched the global literature published from 2001 through 2018 via MEDLINE, EMBASE, the Russian databases eLIBRARY.RU, CyberLeninka, the Chinese databases CNKI, VIP, Journals.	VIP	189192	0	1
31147858	2019	Activation of the transcription factor c-JUN, the pro-apoptotic protein BAX and BH-3-only protein PUMA;	PUMA	98102	1	0
31147858	2019	These findings highlighted the importance of the maintenance of the GSH-dependent (e.g., glutathione peroxidase 1, glutathione synthesis) and -independent (e.g., Roxidative stress scavenger molecules and thiol reducing activity) antioxidant systems (e.g., NAC) in the protection of mesenchymal stroma cells from detrimental stress stimuli, thereby increasing the survival of stromal cells.	NAC	256259	0	1
31147870	2019	The mean total serum IgE level in the AFRS patients was significantly higher than in the EFRS and EMRS patients.	IgE	21 24	1	0
31147889	2019	We further devised a new DIA method named RTwinDIA that schedules the small isolation windows in different retention time blocks, taking advantage of the fact that larger peptides are normally eluting later in reversed phase chromatography.	DIA	25 28	0	1
31147889	2019	We conclude that algorithms like pFind have potential in directly analyzing DIA data acquired with small windows, and that the instrumental time and DIA cycle time, if prioritized to be spent on small windows rather than on covering a broad mass range by large windows, will improve the direct proteome coverage for new biological samples and increase the quantitative precision.	DIA	76 79	0	1
31147889	2019	We conclude that algorithms like pFind have potential in directly analyzing DIA data acquired with small windows, and that the instrumental time and DIA cycle time, if prioritized to be spent on small windows rather than on covering a broad mass range by large windows, will improve the direct proteome coverage for new biological samples and increase the quantitative precision.	DIA	149152	0	1
31147889	2019	These results further provide perspectives for the future convergence between DDA and DIA on faster MS analyzers.	DIA	86 89	0	1
31147962	2019	However, health literacy was also associated with a lower likelihood of wearing long pants, OR = 0.76, CI = 0.58-0.99, or a hat, OR = 0.68, CI = 0.53-0.87, when outdoors.	hat	124127	0	1
31148006	2019	Following physicochemical characterization of micellar Brb, in vitro release studies in simulated physiological media were performed, combined with PK-simulation and in vitro assays of cytotoxicity and direct apoptosis induction in different human prostate cancer cell lines (PC3 and LNPaC).Optimized stealth PEG-PE/TPGS-mixed micelles achieved efficient solubilization of Brb to potentially improve…	PC3	276279	0	1
31148060	2019	Investigating reactive oxygen species, RNS, and H2S-Sensitive Signaling Proteins.	RNS	39 42	0	1
31148063	2019	Though the mitochondrial isoform (hBCATm) was inhibited by nitrosating agents adduct formation could only be observed by DTNB titration as neither SNO, S-glutathionylation or disulfide bond formation could be detected.	DTNB	121125	0	1
31148104	2019	Endogenous hydrogen sulfide is mainly synthesized by cystathionine beta-synthase and cystathionine gamma-lyase (CSE).	CSE	112115	1	0
31148104	2019	Akin to previous studies showing hormonal regulation of nitric oxide biosynthesis, we first reported that uterine and systemic artery hydrogen sulfide biosynthesis is regulated by exogenous estrogens in an ovariectomized sheep model of estrogen replacement therapy, specifically stimulating cystathionine beta-synthase, but not CSE, expression, in uterine and mesenteric, but not carotid, arteries i…	CSE	328331	1	0
31148104	2019	In this chapter we describe a series of methods that we have optimized for analyzing vascular hydrogen sulfide biosynthesis, including (1) real-time quantitative PCR for assessing tissue and cellular levels of cystathionine beta-synthase and CSE mRNAs, (2) immunoblotting for assessing cystathionine beta-synthase and CSE proteins, (3) semiquantitative immunofluorescence microscopy to specifically …	CSE	242245	1	0
31148104	2019	In this chapter we describe a series of methods that we have optimized for analyzing vascular hydrogen sulfide biosynthesis, including (1) real-time quantitative PCR for assessing tissue and cellular levels of cystathionine beta-synthase and CSE mRNAs, (2) immunoblotting for assessing cystathionine beta-synthase and CSE proteins, (3) semiquantitative immunofluorescence microscopy to specifically …	CSE	318321	1	0
31148104	2019	In this chapter we describe a series of methods that we have optimized for analyzing vascular hydrogen sulfide biosynthesis, including (1) real-time quantitative PCR for assessing tissue and cellular levels of cystathionine beta-synthase and CSE mRNAs, (2) immunoblotting for assessing cystathionine beta-synthase and CSE proteins, (3) semiquantitative immunofluorescence microscopy to specifically …	CSE	440443	1	0
31148104	2019	In this chapter we describe a series of methods that we have optimized for analyzing vascular hydrogen sulfide biosynthesis, including (1) real-time quantitative PCR for assessing tissue and cellular levels of cystathionine beta-synthase and CSE mRNAs, (2) immunoblotting for assessing cystathionine beta-synthase and CSE proteins, (3) semiquantitative immunofluorescence microscopy to specifically …	CSE	652655	1	0
31148152	2019	Immunostaining analysis was performed in each specimen, the panel of antibodies used was: CD3, CD4, CD7, CD8, CD20, and CD62L.	CD4	95 98	1	0
31148152	2019	Immunostaining analysis was performed in each specimen, the panel of antibodies used was: CD3, CD4, CD7, CD8, CD20, and CD62L.	CD7	100103	1	0
31148152	2019	Immunostaining analysis was performed in each specimen, the panel of antibodies used was: CD3, CD4, CD7, CD8, CD20, and CD62L.	CD8	105108	1	0
31148152	2019	Immunostaining analysis was performed in each specimen, the panel of antibodies used was: CD3, CD4, CD7, CD8, CD20, and CD62L.	CD20	110114	1	0
31148154	2019	We aim to assess results obtained 10 years after the initiation of a therapeutic protocol which combines very potent topical corticosteroids, vitaminotherapy (B12 and C), and suppression of microtraumas in the management of nonsegmental vitiligo in Madagascar.	B12	159162	0	1
31148159	2019	Electronic searches were performed using six electronic databases (Ovid Medline, PubMed, CCTR, CDSR, ACP Journal Club, and DARE) from their inception until September 2018.	ACP	101104	0	1
31148182	2019	Stephania suberosa extract cannot resurrect ceftazidime in an AmpC producer.	AmpC	62 66	1	0
31148213	2019	INTRODUCTION: The presence of CFTR in smooth muscle and endothelial cells, systemic inflammation, and oxidative stress could explain vascular alterations in cystic fibrosis.	CFTR	30 34	1	0
31148232	2019	Child oral-care performance assessment scale (Root mean squared error of approximation (RMSEA) = 0.06, Comparative fit index = 0.90, Tucker-Lewis index = 0.89, and Coefficient of determination = 0.99) and COPAS-Partial (RMSEA = 0.07, CFI = 0.91, TLI = 0.90, COD = 0.97) had adequate fit.	CFI	234237	0	1
31148232	2019	Child oral-care performance assessment scale (Root mean squared error of approximation (RMSEA) = 0.06, Comparative fit index = 0.90, Tucker-Lewis index = 0.89, and Coefficient of determination = 0.99) and COPAS-Partial (RMSEA = 0.07, CFI = 0.91, TLI = 0.90, COD = 0.97) had adequate fit.	COD	258261	0	1
31148293	2019	Peri-implant mucositis ( 1 site BOP) was diagnosed in 62.9% of control and 69.23% of test patients.	BOP	32 35	0	1
31148331	2019	In clinical mastitic milk, the amount of a major n-6 PUFA, arachidonic acid, tended to increase, whereas amounts of major n-3 polyunsaturated fatty acids, eicosapentaenoic acid and docosahexaenoic acid, tended to decrease.	PUFA	53 57	0	1
31148349	2019	Routine HoNOSCA and CGAS outcome measures were collected over a 6-month period.	CGAS	20 24	0	1
31148361	2019	With RDP level in diet, average daily gain and backfat thickness linearly increased (p < 0.05), and drip loss tended to increase (p 0.08).	drip	100104	0	1
31148374	2019	Considering that LAs show antimicrobial effects besides their analgesic effects, they may contribute to preventing the development and reducing the rate of surgical infections, decreasing the requirement to administer antibiotics.	LAs	17 20	0	1
31148374	2019	However, caution should be exercised not to antagonise the effective treatment of surgical infections, remembering that controversy on the antimicrobial effects of LAs remains in the literature.	LAs	164167	0	1
31148374	2019	Therefore, further comprehensive studies with larger patient populations are warranted to demonstrate the antimicrobial effects of LAs.	LAs	131134	0	1
31148389	2019	SEARCH STRATEGY: A PubMed/MEDLINE, Cochrane, CINAHL Plus, Trip Medical Database and Web of Science search was done for studies on electronic cigarettes and head and neck cancer.	Trip	58 62	0	1
31148465	2019	CETP genotype and concentrations of HDL and lipoprotein subclasses in African-American men.	CETP	0 4	1	0
31148465	2019	Aim: To assess the association between the CETP Taq1B and I405V polymorphisms with levels of lipoprotein subclasses in African-American men with and without Type 2 diabetes .	CETP	43 47	1	0
31148474	2019	Molecular characterization of the isolates was performed by PCR, DNA sequencing, PFGE and DNA hybridization.	PFGE	81 85	0	1
31148500	2019	Novel targeted strategies to overcome resistance in small-cell lung cancer: focus on PARP inhibitors and rovalpituzumab tesirine.	PARP	85 89	1	0
31148500	2019	Moreover, we focus on the current preclinical and clinical evidence on the potential role of PARP inhibitors and rovalpituzumab tesirine to tackle chemoresistance in small-cell lung cancer.	PARP	93 97	1	0
31148500	2019	Expert opinion: Preliminary evidence supports PARP inhibitors and rovalpituzumab tesirine as two promising approaches to either revert or bypass chemoresistance in small-cell lung cancer, respectively.	PARP	46 50	1	0
31148500	2019	Further large-scale clinical studies are urgently needed for a better designation of PARP inhibitors and rovalpituzumab tesirine in the therapeutic algorithm of small-cell lung cancer patients.	PARP	85 89	1	0
31148521	2019	While the biological processes underlying these correlations remain unclear, evidence suggests that HDLs actively inhibit tumor progression through a variety of mechanisms.	HDLs	100104	0	1
31148521	2019	As a result, synthetic HDLs have emerged as attractive agents for targeted cancer therapy.	HDLs	23 27	0	1
31148521	2019	Areas covered: We present a focused review of recent developments in the use of synthetic HDLs for cancer therapy, including roles in drug delivery, RNAi, monotherapy, and immunotherapy.	HDLs	90 94	0	1
31148521	2019	Expert opinion: Synthetic HDLs have already been used in human patients for cardiovascular disease, and have proven to be effective anticancer agents in pre-clinical testing, which should pave the way for future clinical trials in the setting of cancer.	HDLs	26 30	0	1
31148521	2019	Given the growing notoriety of dysregulated cholesterol homeostasis as a key mechanism of cancer progression, and the immense success of synthetic HDLs in animal models, synthetic HDLs are well-poised to make significant strides toward the clinic as cancer therapy.	HDLs	147151	0	1
31148521	2019	Given the growing notoriety of dysregulated cholesterol homeostasis as a key mechanism of cancer progression, and the immense success of synthetic HDLs in animal models, synthetic HDLs are well-poised to make significant strides toward the clinic as cancer therapy.	HDLs	180184	0	1
31148532	2019	Semi-confirmatory factor analysis supported the original two-factor structure: Cognitive Reappraisal and Expressive Suppression (SRMR = .05; RMSEA = .06; CFI = .96).	CFI	154157	0	1
31148542	2019	Reminders and motivational messages were not appreciated by all users, and more user-tailored features in the app were desired.	app	110113	0	1
31148545	2019	This implementation formed the basis for video-based scenario testing of acceptability with adults with a diagnosis of COPD and health professionals involved in their care.	COPD	119123	0	1
31148545	2019	RESULTS: Adults (n=6) with a diagnosis of COPD and health professionals (n=5) specified 4 priority self-management scenarios for which they would like to receive support: at the time of diagnosis (information provision), during acute exacerbations (crisis support), during periods of low mood (emotional support), and for general self-management .	COPD	42 46	0	1
31148545	2019	From the scenario testing, 12 additional adults with COPD felt the system to be both acceptable and engaging, particularly with regard to internet-of-things capabilities.	COPD	53 57	0	1
31148545	2019	A co-design process has allowed the research team to identify key design principles, content, and functionality to underpin an autonomous agent for delivering self-management support to older adults living with COPD and potentially other LTCs.	COPD	211215	0	1
31148603	2019	The net clinical benefit of medical treatment with ACE inhibitors, ARBs, MRAs and beta-blockers has led to the incorporation of these drugs into HF clinical practice guidelines.	MRAs	73 77	1	0
31148676	2016	This project was selected for two years of funding (April 2012-March 2014) by the Alberta Cancer Foundation through an Enhanced Care Grant process (ACF, 2015).	ACF	148151	0	1
31148683	2019	Degr s de collaboration per us entre les patients atteints de cancer et leurs prestataires de soins pendant la radioth rapie.	les	37 40	0	1
31148683	2019	Cette tude d crit les tendances en mati re de relations collaboratives entre les patients et les professionnels de la sant pendant la radioth rapie.	les	77 80	0	1
31148683	2019	Cette tude d crit les tendances en mati re de relations collaboratives entre les patients et les professionnels de la sant pendant la radioth rapie.	les	93 96	0	1
31148683	2019	Pour ce faire, 130 patients atteints de cancer et trait s par radioth rapie dans un centre de canc rologie de l'Ontario ont r pondu un sondage ponctuel.	par	58 61	0	1
31148683	2019	Les principales variables de l' tude portaient sur la collaboration entre les patients et les prestataires de soins de sant et le bien- tre des participants.	Les	0 3	0	1
31148683	2019	Les principales variables de l' tude portaient sur la collaboration entre les patients et les prestataires de soins de sant et le bien- tre des participants.	les	74 77	0	1
31148683	2019	Les principales variables de l' tude portaient sur la collaboration entre les patients et les prestataires de soins de sant et le bien- tre des participants.	les	90 93	0	1
31148683	2019	L' tude a r v l que les patients collaboreraient mieux avec les infirmi res, les radio-oncologues et les radioth rapeutes qu'avec les nutritionnistes, les travailleurs sociaux et le personnel d'accompagnement spirituel [F(5, 760) = 430,42, p<001].	les	20 23	0	1
31148683	2019	L' tude a r v l que les patients collaboreraient mieux avec les infirmi res, les radio-oncologues et les radioth rapeutes qu'avec les nutritionnistes, les travailleurs sociaux et le personnel d'accompagnement spirituel [F(5, 760) = 430,42, p<001].	les	60 63	0	1
31148683	2019	L' tude a r v l que les patients collaboreraient mieux avec les infirmi res, les radio-oncologues et les radioth rapeutes qu'avec les nutritionnistes, les travailleurs sociaux et le personnel d'accompagnement spirituel [F(5, 760) = 430,42, p<001].	les	77 80	0	1
31148683	2019	L' tude a r v l que les patients collaboreraient mieux avec les infirmi res, les radio-oncologues et les radioth rapeutes qu'avec les nutritionnistes, les travailleurs sociaux et le personnel d'accompagnement spirituel [F(5, 760) = 430,42, p<001].	les	101104	0	1
31148683	2019	L' tude a r v l que les patients collaboreraient mieux avec les infirmi res, les radio-oncologues et les radioth rapeutes qu'avec les nutritionnistes, les travailleurs sociaux et le personnel d'accompagnement spirituel [F(5, 760) = 430,42, p<001].	les	130133	0	1
31148683	2019	L' tude a r v l que les patients collaboreraient mieux avec les infirmi res, les radio-oncologues et les radioth rapeutes qu'avec les nutritionnistes, les travailleurs sociaux et le personnel d'accompagnement spirituel [F(5, 760) = 430,42, p<001].	les	151154	0	1
31148683	2019	Les participants qui vivaient davantage de d tresse vis- -vis leurs sympt mes collaboraient toutefois mieux les travailleurs sociaux (p < .05) et les nutritionnistes (p < .05), par rapport ceux qui vivaient moins de d tresse.	mes	74 77	0	1
31148683	2019	Les participants qui vivaient davantage de d tresse vis- -vis leurs sympt mes collaboraient toutefois mieux les travailleurs sociaux (p < .05) et les nutritionnistes (p < .05), par rapport ceux qui vivaient moins de d tresse.	les	108111	0	1
31148683	2019	Les participants qui vivaient davantage de d tresse vis- -vis leurs sympt mes collaboraient toutefois mieux les travailleurs sociaux (p < .05) et les nutritionnistes (p < .05), par rapport ceux qui vivaient moins de d tresse.	les	146149	0	1
31148683	2019	Les participants qui vivaient davantage de d tresse vis- -vis leurs sympt mes collaboraient toutefois mieux les travailleurs sociaux (p < .05) et les nutritionnistes (p < .05), par rapport ceux qui vivaient moins de d tresse.	par	177180	0	1
31148683	2019	Nous avons mis l'hypoth se selon laquelle les participants dont les sympt mes taient moins contraignants ne ressentaient pas le besoin de rencontrer ces professionnels.	mis	11 14	0	1
31148683	2019	Nous avons mis l'hypoth se selon laquelle les participants dont les sympt mes taient moins contraignants ne ressentaient pas le besoin de rencontrer ces professionnels.	les	64 67	0	1
31148683	2019	Nous avons mis l'hypoth se selon laquelle les participants dont les sympt mes taient moins contraignants ne ressentaient pas le besoin de rencontrer ces professionnels.	mes	74 77	0	1
31148683	2019	Nous avons mis l'hypoth se selon laquelle les participants dont les sympt mes taient moins contraignants ne ressentaient pas le besoin de rencontrer ces professionnels.	ces	149152	0	1
31148683	2019	Nous discutons actuellement des futures orientations concernant l'int gration de mesures centr es sur le patient (avec l' ducation ax e sur l'autogestion, par exemple) dans les mod les interprofessionnels de soins du cancer.	des	28 31	0	1
31148683	2019	Nous discutons actuellement des futures orientations concernant l'int gration de mesures centr es sur le patient (avec l' ducation ax e sur l'autogestion, par exemple) dans les mod les interprofessionnels de soins du cancer.	sur	98101	0	1
31148683	2019	Nous discutons actuellement des futures orientations concernant l'int gration de mesures centr es sur le patient (avec l' ducation ax e sur l'autogestion, par exemple) dans les mod les interprofessionnels de soins du cancer.	sur	136139	0	1
31148683	2019	Nous discutons actuellement des futures orientations concernant l'int gration de mesures centr es sur le patient (avec l' ducation ax e sur l'autogestion, par exemple) dans les mod les interprofessionnels de soins du cancer.	par	155158	0	1
31148698	2016	Databases were searched (CINAHL, Medline, PubMed, EBM Reviews, Joanna Briggs Institute EBP) with key words cancer, home, nursing, symptom, and protocol.	EBM	50 53	0	1
31148698	2016	Databases were searched (CINAHL, Medline, PubMed, EBM Reviews, Joanna Briggs Institute EBP) with key words cancer, home, nursing, symptom, and protocol.	EBP	87 90	0	1
31148717	2019	valuation de l'efficacit des proc d s mn motechniques employ s pour aider le personnel duquer les patients ayant re u une greffe autologue de cellules souches h matopo tiques. duquer efficacement le patient peut r duire les co ts et am liorer la sant de celui-ci (Action Cancer Ontario/Cancer Care Ontario, 2006).	les	94 97	0	1
31148717	2019	valuation de l'efficacit des proc d s mn motechniques employ s pour aider le personnel duquer les patients ayant re u une greffe autologue de cellules souches h matopo tiques. duquer efficacement le patient peut r duire les co ts et am liorer la sant de celui-ci (Action Cancer Ontario/Cancer Care Ontario, 2006).	les	220223	0	1
31148717	2019	Le personnel infirmier duque les patients et leurs familles en valuant les besoins d'apprentissage, en utilisant la reformulation p dagogique pour valuer la compr hension et en documentant les soins prodigu s.	les	29 32	0	1
31148717	2019	Le personnel infirmier duque les patients et leurs familles en valuant les besoins d'apprentissage, en utilisant la reformulation p dagogique pour valuer la compr hension et en documentant les soins prodigu s.	les	71 74	0	1
31148717	2019	Le personnel infirmier duque les patients et leurs familles en valuant les besoins d'apprentissage, en utilisant la reformulation p dagogique pour valuer la compr hension et en documentant les soins prodigu s.	les	189192	0	1
31148717	2019	Pour cette tude pilote, une intervention ducative a t mise en place en y int grant un moyen mn motechnique pour int grer une approche structur e et efficace d'enseignement aux patients.	mise	54 58	0	1
31148717	2019	Pour cette tude pilote, une intervention ducative a t mise en place en y int grant un moyen mn motechnique pour int grer une approche structur e et efficace d'enseignement aux patients.	int	73 76	0	1
31148717	2019	Pour cette tude pilote, une intervention ducative a t mise en place en y int grant un moyen mn motechnique pour int grer une approche structur e et efficace d'enseignement aux patients.	int	112115	0	1
31148717	2019	Sur quarante-cinq infirmi res sp cialis es en h matologie de Centre des sciences de la sant d'Hamilton qui ont particip l' tude, trente-six ont rempli les valuations de suivi.	Sur	0 3	0	1
31148717	2019	Sur quarante-cinq infirmi res sp cialis es en h matologie de Centre des sciences de la sant d'Hamilton qui ont particip l' tude, trente-six ont rempli les valuations de suivi.	les	151154	0	1
31148717	2019	Invent pour l' tude, le truc mn motechnique CARE aidait les infirmi res se rappeler les tapes encha ner dans l' ducation du patient.	les	56 59	0	1
31148717	2019	Invent pour l' tude, le truc mn motechnique CARE aidait les infirmi res se rappeler les tapes encha ner dans l' ducation du patient.	les	84 87	0	1
31148717	2019	L'am lioration des connaissances et le recours ce truc se sont maintenus pendant une p riode de suivi de trois six semaines.	des	15 18	0	1
31148717	2019	Bien que la documentation sur l' ducation fournie au patient soit devenue plus rigoureuse apr s l' tude, les changements observ s n'ont pas t statistiquement significatifs.	sur	26 29	0	1
31148717	2019	Bien que la documentation sur l' ducation fournie au patient soit devenue plus rigoureuse apr s l' tude, les changements observ s n'ont pas t statistiquement significatifs.	apr	90 93	0	1
31148717	2019	Bien que la documentation sur l' ducation fournie au patient soit devenue plus rigoureuse apr s l' tude, les changements observ s n'ont pas t statistiquement significatifs.	les	105108	0	1
31148717	2019	D'autres recherches sur le recours aux proc d s mn motechniques en soins infirmiers permettraient de compl ter cette tude pilote.	sur	20 23	0	1
31148739	2019	Validation par entretien cognitif de l'outil d' valuation des plaies malignes malignant wound assessment tool - research.	par	11 14	0	1
31148739	2019	Validation par entretien cognitif de l'outil d' valuation des plaies malignes malignant wound assessment tool - research.	des	58 61	0	1
31148739	2019	La d tresse physique et motionnelle que peuvent causer au patient et sa famille les plaies malignes dues un cancer est souvent n glig e.	les	80 83	0	1
31148739	2019	Malheureusement, nous ne disposons pas d'outils de d pistage et d' valuation fiables et valides pouvant aider mieux traiter ces plaies.	ces	124127	0	1
31148739	2019	Cette tude a cherch valider un outil de mesure des r sultats rapport s par les patients : le Malignant Wound Assessment Tool - Research .	des	47 50	0	1
31148739	2019	La compr hension et l'impression g n rale des patients vis- -vis de cet outil ont t analys es.	des	42 45	0	1
31148739	2019	En g n ral, les participants ont n anmoins trouv que les questions saisissaient bien les principaux enjeux relatifs aux plaies malignes et tenaient compte du point de vue du patient.	ral	7 10	0	1
31148739	2019	En g n ral, les participants ont n anmoins trouv que les questions saisissaient bien les principaux enjeux relatifs aux plaies malignes et tenaient compte du point de vue du patient.	les	53 56	0	1
31148739	2019	En g n ral, les participants ont n anmoins trouv que les questions saisissaient bien les principaux enjeux relatifs aux plaies malignes et tenaient compte du point de vue du patient.	les	85 88	0	1
31148739	2019	Le fait d' tablir la validit apparente et de contenu du malignant wound assessment tool - research du point de vue des patients par la technique d'entretien cognitif vient tayer la validit de cet outil.	des	115118	0	1
31148745	2016	This project was selected for two years of funding (April 2012-March 2014) by the Alberta Cancer Foundation through an Enhanced Care Grant process (ACF, 2015).	ACF	148151	0	1
31148747	2019	Effective patient education can influence cost savings and improve patient outcomes (CCO, 2006).	CCO	85 88	0	1
31148848	2019	Visualizing a "flow effect" or air bubbles dispersing through the ostia, sonographically assessed shifts in cul de sac volume, and selective Fallopian tubal cannulation are reportedly promising hysteroscopic techniques.	sac	115118	0	1
31148869	2019	Background: Chronic plantar ulcers are common problems for leprosy patients with numb feet due to their prolonged healing time.	numb	81 85	0	1
31148872	2019	Analysis of Cutaneous Adverse Drug Reactions Reported at the Regional ADR Monitoring Center.	ADR	70 73	0	1
31148880	2019	In these cases, proper identification of bat species is important to public health experts as it will inform future testing procedures and management practices, as well as broaden our understanding of rabies virus bat variant distributions and disease ecology.	bat	41 44	0	1
31148880	2019	In these cases, proper identification of bat species is important to public health experts as it will inform future testing procedures and management practices, as well as broaden our understanding of rabies virus bat variant distributions and disease ecology.	bat	214217	0	1
31148880	2019	For this reason, a dichotomous key and bat identification guide, designed to differentiate bats to species level, has been developed.	bat	39 42	0	1
31148888	2019	Conclusion: The results suggest strong positive correlation between serum uric acid level with blood pressure (Sblood pressure and DBP), age, body mass index, and waist circumference among patients with type 2 diabetes mellitus.	DBP	131134	0	1
31148889	2019	The most prevalent PIM group during hospitalization was identified as the "medications to be avoided in older adults" (48.8%), whereas it also formed 52% of medications prescribed at discharge.	PIM	19 22	0	1
31148893	2019	Relationship Between Antimicrobial Prescribing and Antimicrobial Resistance Among UTI Patients at Buraidah Central Hospital, Saudi Arabia.	UTI	82 85	0	1
31148893	2019	The changing antimicrobial sensitivity in UTI requires appropriate antibiotics.	UTI	42 45	0	1
31148893	2019	Objectives: This study aimed to determine the most common bacterial agents causing UTI in different seasons among patients who were admitted to Buraidah Central Hospital, Saudi Arabia.	UTI	83 86	0	1
31148893	2019	However, the relationship between antimicrobial prescribing and antimicrobial resistance was significantly negative among UTI patients in buraidah central hospital, Saudi Arabia.	UTI	122125	0	1
31148908	2019	RESULTS: Between February 2016 and December 2017, 38 patients were randomly assigned to two groups, with 19 patients in each group, to receive ARplastic stents or traditional pss.	pss	175178	0	1
31148929	2019	Six species are documented, one new species Lacturanalli Matson & Wagner, sp. n. is described, and two new synonymies are proposed: Lacturapsammitis (Zeller, 1872), syn. n. and L.rhodocentra (Meyrick, 1913), syn. n.	syn	165168	0	1
31148929	2019	Six species are documented, one new species Lacturanalli Matson & Wagner, sp. n. is described, and two new synonymies are proposed: Lacturapsammitis (Zeller, 1872), syn. n. and L.rhodocentra (Meyrick, 1913), syn. n.	syn	208211	0	1
31148946	2019	Methods: We collected cerebrospinal fluid samples from children presenting with symptoms requiring investigation for meningitis at a tertiary hospital in Cape Town, South Africa.	Cape	154158	0	1
31148946	2019	Using a multiplex platform, we investigated the concentrations of biomarkers comprising a previously established 3-marker biosignature (VEGF, IL-13, and LL-37) and other potentially useful host biomarkers as diagnostic candidates for tuberculous meningitis.	VEGF	136140	1	0
31148946	2019	However, substitution of IL-13 and LL-37 with IFN-gamma and MPO, respectively, resulted in improved accuracy (area under the ROC curve (AUC) = 0.97, 95% CI, 0.92-1.00, up to 91.3% (21/23) sensitivity and up to 100% (24/24) specificity).	MPO	60 63	1	0
31148946	2019	An alternative four-marker biosignature (sICAM-1, MPO, CXCL8, and IFN-gamma) also showed potential, with an AUC of 0.97.	MPO	50 53	1	0
31148961	2019	Conclusion: The proportion of children sleeping under nets was comparable to MDG target.	MDG	77 80	0	1
31148967	2019	NP and NS1 proteins of H5N1 virus significantly upregulated IFITM1, IFITM2, and IFITM3 in A549 cells.	NS1	7 10	1	0
31148967	2019	Methods: NS1, M1, NP, PB2, HA and NA genes of H5N1 virus were generated by PCR and cloned into pcDNA3.1/myc-His (+) A vector for genes over-expression experiments.	NS1	9 12	1	0
31148967	2019	Results: Research displayed that NS1, M1, NP, and PB2 proteins of H5N1 virus increased IFITM1, IFITM2, and IFITM3 expression in A549 cells, only IFITM1 was upregulated by M1 in HEK293T cells.	NS1	33 36	1	0
31148967	2019	Conclusion: Taken together, our data suggested that IFITM1, IFITM2, and IFITM3 might be directly upregulated via NS1, M1, NP, and PB2 proteins during H5N1 avian influenza virus infection.	NS1	113116	1	0
31148967	2019	This study provided new insights into the influence of NS1 and NP proteins on regulation of IFITM1, IFITM2, and IFITM3 expression following H5N1 infection.	NS1	55 58	1	0
31148987	2019	Also, 64.2% and 49.6% children of the rich women received BCG and DPT 3 compared to 15.9% and 8.7% observed among the children of the poor.	DPT	66 69	0	1
31149000	2019	Having more than one lifetime sexual partner (AOR=2.91, 95%CI:1.13, 7.52), a history of sexually transmitted disease (AOR=4.04, 95%CI: 2.19, 7.44), age at first birth less than 18 years (AOR=3.36, 95%CI: 1.79, 5.01) and baseline CD4 count less than 200 cells/mm3 (AOR=7.51, 95%CI: 3.58, 15.68) were significantly associated with pre-cancerous lesion of the cervix.	CD4	229232	1	0
31149012	2019	Result of confirmatory factor analysis, model fit indexes were x2/df: 1.59, RMSEA: 0.071, CFI: 0.96, NNFI: 0.95.	CFI	90 93	0	1
31149060	2019	Engagement of the right heart ventricle was also found - increased deceleration time and decreased e/a tric ratio.	tric	103107	0	1
31149066	2019	The relationship between NLR-platelet lymphocyte ratio and laboratory parameters, GFR (MDRD-GFR), parathyroid hormone and vitamin D were investigated.	GFR	82 85	0	1
31149066	2019	The impact of parathyroid hormone on neutrophil lymphocyte ratio was independent of GFR.	GFR	84 87	0	1
31149078	2016	A significant difference between control and infertility group regarding the presence of BsmI (A>G) and ApaI (G>T) polymorphisms was observed in infertile group, prolactin and DHEA were found to correlate significantly statistic with BsmI GG genotype, whereas ApaI AA genotype correlates with prolactin and SHBG levels.	SHBG	307311	1	0
31149093	2016	COST ACTION BM 1105 "GNRH DEFICIENCY: ELUCIDATION OF THE NEUROENDOCRINE CONTROL OF HUMAN REPRODUCTION".	GNRH	21 25	1	0
31149093	2016	Through the development of a networking platform, the Action advanced the field of neuroendocrinology via: guidelines for the best clinical care of GnRH deficient patients, translating scientific understanding into improved patient care and creating a lasting European tradition of excellence in the field of reproductive medicine.	GnRH	148152	1	0
31149103	2016	Preoperative vit D level was found significantly lower in patients with biochemical (p = 0.006) and clinical (p < 0.001) hypocalcemia in comparison to normocalcemic patients.	vit	13 16	0	1
31149103	2016	The patients who had <10 ng/mL vit D level (severe deficiency) developed significantly more biochemical and clinical hypocalcemia than the patients with serum vit D level higher than 10 ng/mL (p = 0.030 and p < 0.001, respectively).	vit	31 34	0	1
31149103	2016	The patients who had <10 ng/mL vit D level (severe deficiency) developed significantly more biochemical and clinical hypocalcemia than the patients with serum vit D level higher than 10 ng/mL (p = 0.030 and p < 0.001, respectively).	vit	159162	0	1
31149103	2016	Conclusions: Although postthyroidectomy hypocalcemia is multifactorial, vit D deficiency, particularly severe form, is significantly associated with the development of biochemical and clinical hypocalcemia.	vit	72 75	0	1
31149103	2016	Vit D supplementation can prevent this unwanted complication in such patients.	Vit	0 3	0	1
31149107	2016	We aim to assess relationship of vitamin D, B12, and folic acid levels and dietary vitamin intake and insulin resistance in obese people.	B12	44 47	0	1
31149107	2016	Mean vitamin D, B12, and folic acid levels were significantly lower in patients than in controls.	B12	16 19	0	1
31149107	2016	BMI negatively correlated with vitamin D, B12, and folic acid levels.	B12	42 45	0	1
31149107	2016	B12 levels negatively correlated with duration of obesity.	B12	0 3	0	1
31149107	2016	Insulin resistance was found in 55.9% of patients and HOMA-IR levels negatively correlated with vitamin D and B12 levels.	B12	110113	0	1
31149107	2016	Conclusions: The study reveals that vitamin D, B12, and folic acid levels were low and poor vitamin D and B12 status were associated with insulin resistance in nondiabetic obese patients.	B12	47 50	0	1
31149107	2016	Conclusions: The study reveals that vitamin D, B12, and folic acid levels were low and poor vitamin D and B12 status were associated with insulin resistance in nondiabetic obese patients.	B12	106109	0	1
31149108	2016	A simple, highly sensitive, accurate and rather inexpensive procedure for the simultaneous determination of phenylalanine and Tyr plasma concentrations was previously described in this journal.	Tyr	126129	0	1
31149120	2016	Additionally, most cases with 2+ and 3+ staining patterns were follicular variants of papillary thyroid carcinoma (75% and 81%, respectively, p<0.001) and none of FAs showed 3+ positivity (p<0.001).	FAs	163166	0	1
31149120	2016	Additionally, most of strongly positive results in patients > 45 y/o were PTC (p<0.001).	PTC	74 77	0	1
31149120	2016	We found diffuse and strong (3+) staining pattern in follicular variants of papillary thyroid carcinoma but none of FAs were so.	FAs	116119	0	1
31149132	2016	Results: We present the case of a patient with unexplained high bone mass (Z-scores at L3, L1-L4, total hip and radius total were +3, +2.7, +2 and +1.8, respectively) and concurrent symptomatic primay hyperparathyroidism (total serum calcium 11.9 mg/dL, serum Parathyroid Hormone - PTH 189.3 pg/mL) of long duration.	PTH	282285	1	0
31149132	2016	There were no significant BMD changes at any skeletal site after the surgical cure of hyperparathyroidism.	BMD	26 29	0	1
31149132	2016	Testing for LRP (low density lipoprotein receptor-related proteins) 5 gene mutations was negative.	LRP	12 15	1	0
31149132	2016	Conclusions: We presented an unusual case of the association of a high bone mass with primary hyperparathyroidism with resistance to the catabolic action of PTH.	PTH	157160	1	0
31149135	2016	Design: The medical records of all patients who underwent adrenalectomy for PCC were reviewed retrospectively.	PCC	76 79	0	1
31149141	2017	If ultrasound parathyroids suggests a single large adenoma, minimally invasive parathyroidectomy with intraoperative PTH monitoring can be considered.	PTH	117120	1	0
31149154	2017	Hormonal studies for adrenal incidentaloma revealed: Aldosterone/Renin ratio, 0.70 ([normal range < 30]; normal DHEA-S, 85.0 g/dL ([normal range, 80 -560 g/dL]), ACTH 25 pg/mL ([normal range, 10 - 60 pg/mL]), morning serum cortisol 8.9 g/dL ([normal range, 5 - 12 g/dL]).	ACTH	162166	1	0
31149155	2017	The second case, a 26 year old male with birth asphyxia, cryptorchidism, poor growth in childhood and adolescence (-3 to -4 height SDS), absent puberty and normal adult height (-1.18 SDS; bone age 15.5 years and active growth plates) had GH, TSH, ACTH deficiency and low normal PRL levels.	PRL	278281	1	0
31149158	2017	CPAP treatment alongside the levothyroxine treatment at TSH levels above 10mUI/L have controlled the malignant arrhythmic events without complex antiarrhythmic drugs sustaining the pathogenic contributions of this two pathologies in arrhythmogenesis process.	CPAP	0 4	1	0
31149173	2017	Context: Anti-Mullerian hormone assay is becoming the best indicator of successful IVF treatment response to fertility drugs and could be a useful marker of embryo implantation potential.	IVF	83 86	0	1
31149174	2017	The phenylalanine spot was visible on 2D - TLC plates at phenylalanine concentrations higher than 300 mol/L.	TLC	43 46	0	1
31149174	2017	The 2D - TLC methodology is adequate to detect patients with severe phenylketonuria.	TLC	9 12	0	1
31149175	2017	CEA, CA 15-3 and HER2 ECD are not of interest for their predictive role.	CEA	0 3	1	0
31149177	2017	Nine months after highly active antiretroviral therapy initiation the viral load was undetectable (under 34 copies/muL) and the CD4 count reached 645 cells/mm3 (within normal range) after one year of treatment.	CD4	128131	1	0
31149177	2017	At this time immune competence with a normal CD4 count and a CD4/CD8 ratio over 1 was achieved.	CD4	45 48	1	0
31149180	2017	After he was admitted to our hospital, this patient was confirmed with NC 21 OHD and presented low level cortisol, striking elevated ACTH, aldosterone insufficiency, increased 17-hydroxyprogesterone, progesterone, decreasing androgens and azoospermatism.	ACTH	133137	1	0
31149191	2017	Pregnant group had hCG result more than 25 IU/mL while the rest were included in the non-pregnant group.	hCG	19 22	1	0
31149191	2017	It was found that T4 gave significant negative association with grading of embryo-I, blastocysts formed, thickness of endometrium and number of gestational sacs.	sacs	156160	0	1
31149192	2017	Control group benefited from the same procedures except for cold mud therapy and mineral water baths.	mud	65 68	0	1
31149192	2017	Therapeutic properties of Techirghiol mud still need further research.	mud	38 41	0	1
31149194	2017	SURGERY OUTCOMES IN PATIENTS WITH SECONDARY HYPERPARATHYROIDISM AND IMPACT OF INTRA-OPERATIVE PTH MEASUREMENT.	PTH	94 97	1	0
31149194	2017	Objective: The aim of our study was to evaluate the outcomes of parathyroid surgery in patients with secondary hyperparathyroidism and the advantages of intraoperative quick PTH to improve surgical results.	PTH	174177	1	0
31149194	2017	Material and methods: In a real-life study, we compared one group of secondary hyperparathyroidism with intraoperative quick pth performed after removing all suspected glands and before wound suture (Group 1) and one group in that intraoperative quick pth was not assessed (Group 2).	pth	125128	1	0
31149194	2017	Material and methods: In a real-life study, we compared one group of secondary hyperparathyroidism with intraoperative quick pth performed after removing all suspected glands and before wound suture (Group 1) and one group in that intraoperative quick pth was not assessed (Group 2).	pth	252255	1	0
31149194	2017	When intraoperative quick pth dropped less than 50%, additional exploration followed.	pth	26 29	1	0
31149194	2017	Results: Eight out of the 34 patients from Group 1, who underwent subtotal parathyroidectomy, showed elevated levels of serum PTH and calcium, which remained elevated during follow-up, thus, suggesting disease persistence.	PTH	126129	1	0
31149194	2017	Serum calcium, but not PTH was increased in one patient from the intraoperative quick pth group but normalized after one month.	PTH	23 26	1	0
31149194	2017	Serum calcium, but not PTH was increased in one patient from the intraoperative quick pth group but normalized after one month.	pth	86 89	1	0
31149194	2017	Overall, intraoperative quick pth allowed detection of a supplementary parathyroid gland in one case, thereby increasing early post-surgery remission to 100% in Group 2 compared to 76.47% in Group 1.	pth	30 33	1	0
31149194	2017	Conclusions: Assessment of intra-operative PTH levels proved to be a useful tool in augmenting the outcome of secondary hyperparathyroidism surgery.	PTH	43 46	1	0
31149194	2017	In patients which are eligible for renal transplantation who undergo a subtotal resection, intraoperative quick pth can enhance the post-operative quality of life by lowering disease recurrence rates until the kidney transplant procedure.	pth	112115	1	0
31149202	2017	The surgical procedure represented a milestone for both the anesthesiologist (difficult intubation, with a thin tracheal tube in the absence of the jet ventilation technology) and for the surgeon.	jet	148151	0	1
31149206	2017	In contrast, in PCP, BRAF (gene coding for a main actor in the MAPkinase pathway) mutations have been found in the majority of cases.	BRAF	21 25	1	0
31149208	2017	Background: People chew betel nut (Areca catechu) for physical work and stress reduction, but it contains arecoline, which has both therapeutic value and untoward effects on endocrine and gonadal functions.	nut	30 33	0	1
31149230	2018	Objective: We aimed to investigate the response of ucOC and osteoprotegerin to dysglycemia and/or dexamethasone in primary human osteoblastic cell cultures.	ucOC	51 55	0	1
31149230	2018	Results: ucOC production differed significantly (p<0.05) between cell groups, decreasing in a dose-dependent manner as glucose concentration in the medium increased.	ucOC	9 13	0	1
31149230	2018	Osteoprotegerin levels appeared not to be significantly influenced by the hyperglycemic culture medium and were not related to ucOC concentration (p>0.05).	ucOC	127131	0	1
31149230	2018	Addition of dexamethasone resulted in significantly lower ucOC concentrations compared to vehicle-treated cells (p<0.05).	ucOC	58 62	0	1
31149230	2018	However, the effect of insulin co-treatment on ucOC was not counteracted by dexamethasone (p<0.05).	ucOC	47 51	0	1
31149230	2018	Dexamethasone suppressed ucOC levels however not in insulin-rich environment.	ucOC	25 29	0	1
31149237	2018	Objective: We aimed to investigate NIS, Galectin-3, PTEN, P53 and Ki67 expressions in tumor tissue and metastatic lymph nodes in PTC and their association with lymph node metastasis and prognosis.	NIS	35 38	1	0
31149237	2018	Objective: We aimed to investigate NIS, Galectin-3, PTEN, P53 and Ki67 expressions in tumor tissue and metastatic lymph nodes in PTC and their association with lymph node metastasis and prognosis.	PTEN	52 56	1	0
31149237	2018	Objective: We aimed to investigate NIS, Galectin-3, PTEN, P53 and Ki67 expressions in tumor tissue and metastatic lymph nodes in PTC and their association with lymph node metastasis and prognosis.	P53	58 61	1	0
31149237	2018	Objective: We aimed to investigate NIS, Galectin-3, PTEN, P53 and Ki67 expressions in tumor tissue and metastatic lymph nodes in PTC and their association with lymph node metastasis and prognosis.	PTC	129132	0	1
31149237	2018	NIS, Galectin-3, PTEN, P53 and Ki67 immunohistochemical stainings were performed for all surgical tumor tissues and metastatic lymph nodes of the 38 patients.	NIS	0 3	1	0
31149237	2018	NIS, Galectin-3, PTEN, P53 and Ki67 immunohistochemical stainings were performed for all surgical tumor tissues and metastatic lymph nodes of the 38 patients.	PTEN	17 21	1	0
31149237	2018	NIS, Galectin-3, PTEN, P53 and Ki67 immunohistochemical stainings were performed for all surgical tumor tissues and metastatic lymph nodes of the 38 patients.	P53	23 26	1	0
31149237	2018	NIS, PTEN and Galectin-3 protein expressions in tumor tissue were not associated with gender, tumor size, multifocality, extrathyroidal extension, capsular invasion, lymph node metastasis and tumor recurrence.	NIS	0 3	1	0
31149237	2018	NIS, PTEN and Galectin-3 protein expressions in tumor tissue were not associated with gender, tumor size, multifocality, extrathyroidal extension, capsular invasion, lymph node metastasis and tumor recurrence.	PTEN	5 9	1	0
31149237	2018	Intensity and expression of NIS and PTEN in tumor tissue were concordant with intensity and expression in metastatic lymph nodes (p<0.001).	NIS	28 31	1	0
31149237	2018	Intensity and expression of NIS and PTEN in tumor tissue were concordant with intensity and expression in metastatic lymph nodes (p<0.001).	PTEN	36 40	1	0
31149237	2018	Conclusions: NIS, PTEN, Galectin-3, Ki67 and P53 expressions were not associated with the risk of lymph node metastasis in PTC patients.	NIS	13 16	1	0
31149237	2018	Conclusions: NIS, PTEN, Galectin-3, Ki67 and P53 expressions were not associated with the risk of lymph node metastasis in PTC patients.	PTEN	18 22	1	0
31149237	2018	Conclusions: NIS, PTEN, Galectin-3, Ki67 and P53 expressions were not associated with the risk of lymph node metastasis in PTC patients.	P53	45 48	1	0
31149237	2018	Conclusions: NIS, PTEN, Galectin-3, Ki67 and P53 expressions were not associated with the risk of lymph node metastasis in PTC patients.	PTC	123126	0	1
31149255	2018	Context: Betel nut is consumed by millions of people for stress reduction and increased capacity to work.	nut	15 18	0	1
31149259	2018	Subjects and Methods: 153 patients, mean age 59.1 12.1 yrs, females and males (10%), mean BMI 26.2 4.8 kg/m2, mean serum calcium and PTH of 11.3 1.2 mg/dL and 232 329 pg/mL, respectively;	PTH	133136	1	0
31149264	2018	Mendelian randomization studies in large cohorts of diabetes indicated pathogenic role of PPM1K (protein phosphatase Mg2+/Mn2+ dependent 1K) on Chr 4q22.1 gene, encoding for a phosphatase that activates BCKDH (branched chain keto acid dehydrogenase) complex.	Chr	144147	0	1
31149264	2018	A review of genetic syndromes of branched chained amino acids metabolism suggests that insulin resistance is not present, except rare cases of methylmalonic aciduria due to MUT (methylmalonyl-coA mutase) gene on Chr 6p12.3.	MUT	173176	1	0
31149264	2018	A review of genetic syndromes of branched chained amino acids metabolism suggests that insulin resistance is not present, except rare cases of methylmalonic aciduria due to MUT (methylmalonyl-coA mutase) gene on Chr 6p12.3.	Chr	212215	0	1
31149267	2018	Context: Noninvasive encapsulated anaplastic thyroid carcinomas have been described in few case reports, and consistently associated with favorable outcome compared to the classical ATCs.	ATCs	182186	0	1
31149267	2018	Objective: Our aim is to remark a rare histological finding in ATCs, encapsulation, which has been associated with a favorable outcome.	ATCs	63 67	0	1
31149267	2018	We also provided a thorough discussion of all the encapsulated ATCs reported in the literature.	ATCs	63 67	0	1
31149267	2018	There were no BRAF codon 600, KRAS, NRAS mutations and RET/PTC rearrangement.	BRAF	14 18	1	0
31149267	2018	There were no BRAF codon 600, KRAS, NRAS mutations and RET/PTC rearrangement.	KRAS	30 34	1	0
31149267	2018	There were no BRAF codon 600, KRAS, NRAS mutations and RET/PTC rearrangement.	NRAS	36 40	1	0
31149267	2018	Conclusion: Encapsulated ATCs tend to follow a favorable clinical course and may deserve conservative treatment approaches.	ATCs	25 29	0	1
31149282	2019	Results: In polycystic ovary syndrome women, serum levels of insulin, HOMA-IR, testosterone, LH, and LH/FSH were significantly higher, while SHBG was lower than in healthy women.	SHBG	141145	1	0
31149284	2019	Esophageal manometry was performed using MMS (Medical Measurement Systems bv. The Netherlands) Solar GI - Air Charged Intelligent Gastrointestinal Conventional Manometry.	MMS	41 44	0	1
31149288	2019	Using multivariate Cox proportional regression model we found that distant metastases and Ki 67 index were independent risk factors for the survival outcome.	Cox	19 22	0	1
31149289	2019	Design: This is a cross sectional study, conducted at the Departments of Diabetes, Nutrition and Metabolic Diseases, and Gastroenterology and Hepatology, of the Clinical Emergency Hospital "Pius Brinzeu" Timisoara.	Pius	190194	0	1
31149289	2019	Liver steatosis and fibrosis were evaluated through transient elastography, yielding two parameters: liver stiffness as an indicator of liver fibrosis stage, expressed in kPa, and liver steatosis stage, assessed by controlled attenuation parameter, expressed in dB/m.	kPa	171174	0	1
31149310	2019	The prolactin response on the TRH test was found to be significantly lower in sheehan syndrome patients compared to non-sheehan syndrome patients(p<0.05).	TRH	30 33	1	0
31149311	2019	Objective: To study the clinical presentation of CRF as well as the posttreatment evolution of craniopharyngioma in children versus adults in a large mixed cohort.	CRF	49 52	0	1
31149311	2019	Material and methods: We performed a retrospective review of CRF patients evaluated in the National Institute of Endocrinology in Bucharest between 1990 and 2016.	CRF	61 64	0	1
31149312	2019	The present study aimed to evaluate the usefulness of two chromatographic methodologies for determination of plasma Phe level in the routine management of phenylketonuria: the two dimensional thin layer chromatography (2D - TLC) and the high performance liquid chromatography procedures, respectively.	TLC	224227	0	1
31149312	2019	Results: In case of three subjects the very low concentrations of plasma Phe could not be detected by the 2D - TLC methodology, since the spot was not visible on the chromatogram.	TLC	111114	0	1
31149312	2019	This is due to the greater errors that appear in the case of 2D - TLC methodology.	TLC	66 69	0	1
31149312	2019	In the range of concentrations of plasma Phe higher than 360 mumol/L (which is the cut-off value for HPA), although in four cases there were statistically significant differences in the level of plasma Phe determined by the two methodologies, the value obtained by the 2D - TLC methodology was high enough to influence the decision of changing the diet so that hyperphenylalaninemia is kept under co…	HPA	101104	0	1
31149312	2019	In the range of concentrations of plasma Phe higher than 360 mumol/L (which is the cut-off value for HPA), although in four cases there were statistically significant differences in the level of plasma Phe determined by the two methodologies, the value obtained by the 2D - TLC methodology was high enough to influence the decision of changing the diet so that hyperphenylalaninemia is kept under co…	TLC	274277	0	1
31149312	2019	In addition, the intense spot of Phe on the 2D - TLC chromatogram may be detected even by un unexperienced laboratory specialist.	TLC	49 52	0	1
31149312	2019	The 2D - TLC procedure may be accompanied by relatively high errors;	TLC	9 12	0	1
31149325	2019	The rise of circulatory endothelin -1 and endothelin receptors (ETA, ETB) expression in kidney of obese wistar rat.	ETA	64 67	1	0
31149325	2019	The rise of circulatory endothelin -1 and endothelin receptors (ETA, ETB) expression in kidney of obese wistar rat.	ETB	69 72	1	0
31149325	2019	BACKGROUND: Endothelin -1, a circulatory protein, and its receptors (ETA and ETB) in various organs were reported to play a pivotal role in many diseases, including obesity.	ETA	69 72	1	0
31149325	2019	BACKGROUND: Endothelin -1, a circulatory protein, and its receptors (ETA and ETB) in various organs were reported to play a pivotal role in many diseases, including obesity.	ETB	77 80	1	0
31149325	2019	However, the changes of ETA and ETB expression in ventricle and kidney in obesity was less reported.	ETA	24 27	1	0
31149325	2019	However, the changes of ETA and ETB expression in ventricle and kidney in obesity was less reported.	ETB	32 35	1	0
31149325	2019	The concentration of circulatory ET-1, ETA and ETB of ventricle and kidney were measured by Enzyme Linked Immunosorbent Assay technique after the termination of both groups at 14th and 24th weeks.	ETA	39 42	1	0
31149325	2019	The concentration of circulatory ET-1, ETA and ETB of ventricle and kidney were measured by Enzyme Linked Immunosorbent Assay technique after the termination of both groups at 14th and 24th weeks.	ETB	47 50	1	0
31149325	2019	RESULTS: The level of circulatory ET-1, expression of ETA and ETB in kidney, and LDL of obese rats were significantly higher than control rats (T-Test, P<0.05) in the elder groups, while no differences of the ETA and ETB were found in the ventricle.	ETA	54 57	1	0
31149325	2019	RESULTS: The level of circulatory ET-1, expression of ETA and ETB in kidney, and LDL of obese rats were significantly higher than control rats (T-Test, P<0.05) in the elder groups, while no differences of the ETA and ETB were found in the ventricle.	ETB	62 65	1	0
31149325	2019	RESULTS: The level of circulatory ET-1, expression of ETA and ETB in kidney, and LDL of obese rats were significantly higher than control rats (T-Test, P<0.05) in the elder groups, while no differences of the ETA and ETB were found in the ventricle.	ETA	209212	1	0
31149325	2019	RESULTS: The level of circulatory ET-1, expression of ETA and ETB in kidney, and LDL of obese rats were significantly higher than control rats (T-Test, P<0.05) in the elder groups, while no differences of the ETA and ETB were found in the ventricle.	ETB	217220	1	0
31149325	2019	No differences of the levels of circulatory ET-1, ETA and ETB expression were found between obese and control groups of younger rats (P>0.05).	ETA	50 53	1	0
31149325	2019	No differences of the levels of circulatory ET-1, ETA and ETB expression were found between obese and control groups of younger rats (P>0.05).	ETB	58 61	1	0
31149337	2019	The second hypothesis was that increasing dietary Ca increases plasma Ca concentration and downregulates abundance of genes related to Ca absorption (TRPV6, S100G, and ATP2B1) in the duodenum, and tight junction proteins (OCLN, CLDN1, and ZO1) in the duodenum and ileum.	OCLN	222226	1	0
31149337	2019	The second hypothesis was that increasing dietary Ca increases plasma Ca concentration and downregulates abundance of genes related to Ca absorption (TRPV6, S100G, and ATP2B1) in the duodenum, and tight junction proteins (OCLN, CLDN1, and ZO1) in the duodenum and ileum.	ZO1	239242	1	0
31149337	2019	Results: The predicted maximum ADG (614 g), G:F (0.65), and bone ash (11.68 g) was obtained at standardized total tract digestible Ca:standardized total tract digestible P ratios of 1.39:1, 1.25:1, and 1.66:1, respectively, when standardized total tract digestible P was provided at the requirement (0.33%).	ADG	31 34	0	1
31149337	2019	If dietary standardized total tract digestible P was below the requirement, increasing dietary Ca resulted in reduced (P < 0.05) ADG and G:F.	ADG	129132	0	1
31149337	2019	However, if dietary standardized total tract digestible P was above the requirement, negative effects (P < 0.05) on ADG and G:F of increasing standardized total tract digestible Ca were observed only if dietary standardized total tract digestible Ca exceeded 0.6%.	ADG	116119	0	1
31149337	2019	There was a linear negative effect (P < 0.05) of standardized total tract digestible Ca on the abundance of S100G, TRPV6, OCLN, and ZO1 in duodenum, and CLDN and ZO1 in ileum.	OCLN	122126	1	0
31149337	2019	There was a linear negative effect (P < 0.05) of standardized total tract digestible Ca on the abundance of S100G, TRPV6, OCLN, and ZO1 in duodenum, and CLDN and ZO1 in ileum.	ZO1	132135	1	0
31149337	2019	There was a linear negative effect (P < 0.05) of standardized total tract digestible Ca on the abundance of S100G, TRPV6, OCLN, and ZO1 in duodenum, and CLDN and ZO1 in ileum.	ZO1	162165	1	0
31149339	2019	As management of anthropogenic resources changes, so too may the costs and potential benefits of foraging strategies which are strongly tied to human activities.	tied	136140	0	1
31149342	2019	Using a high-throughput screening method (dynamic mass redistribution; DMR), mouse- and human-induced pluripotent stem cell cardiomyocytes exposed to l-alpha-lysophosphatidylinositol were shown to exhibit a rapid, sustained, and concentration-dependent (1 nmol L-1-30 mumol L-1) cellular response.	DMR	71 74	0	1
31149342	2019	Y-27632 (ROCK inhibitor; 10 & 50 mumol L-1) and cannabidiol (1 mumol L-1) both abolished the DMR response to l-alpha-lysophosphatidylinositol (10 mumol L-1).	DMR	93 96	0	1
31149342	2019	In murine induced pluripotent stem cell cardiomyocytes, LPI-induced ROCK and p38 MAPK phosphorylation, both of which were prevented by Y-27632 and cannabidiol, but did not induce JNK activation or cleavage of caspase-3.	JNK	179182	1	0
31149344	2019	A novel missense PTEN mutation identified in a patient with macrocephaly and developmental delay.	PTEN	17 21	1	0
31149344	2019	A germline mutation in the PTEN gene induces not only PTEN hamartoma tumor syndrome, including Cowden syndrome, but also macrocephaly/autism syndrome.	PTEN	27 31	1	0
31149344	2019	Here, we describe a boy with macrocephaly/autism syndrome harboring a novel missense heterozygous PTEN mutation, c.959T>C (p.Leu320Ser).	PTEN	98102	1	0
31149350	2019	We find that, in mice, parenterally delivered SLA-SE is at least as effective as the double-mutant labile toxin (LTR192G/L211A, dmLT) adjuvant in promoting functional antibodies and eliciting intestinal IgA responses to the vaccine antigen.	IgA	203206	1	0
31149366	2019	Gene expression studies using qPCR for the proapoptotic genes, CASP3, CASP8 and P53 were also carried out.	P53	80 83	1	0
31149366	2019	The alcohol extract of T.fuscatus exhibited the most promising activity against all the cancer cell lines tested (DU145 IC50 = 96.48 1.36 mug/ml, HCC 1395 IC50 = 61.44 2.45 mug/ml, Hep2 IC50 = 0.52 0.36 mug/ml) and also had the highest selectivity index of 4.94, 7.78 and 921.97 for DU145, HCC 1395 and Hep-2 cells respectively.	HCC	146149	0	1
31149366	2019	The alcohol extract of T.fuscatus exhibited the most promising activity against all the cancer cell lines tested (DU145 IC50 = 96.48 1.36 mug/ml, HCC 1395 IC50 = 61.44 2.45 mug/ml, Hep2 IC50 = 0.52 0.36 mug/ml) and also had the highest selectivity index of 4.94, 7.78 and 921.97 for DU145, HCC 1395 and Hep-2 cells respectively.	HCC	290293	0	1
31149366	2019	Furthermore, t.fuscatus was the only extract that significantly upregulated the expression of caspase 3, caspase 8 and P53.	P53	119122	1	0
31149375	2019	Here, we present a parallel-detection approach that maintains the same A-scan rate and axial measurement range as conventional OCT.	OCT	127130	0	1
31149375	2019	When a parallel detection is implemented using swept-source OCT, synchronization between the A-scans and synchronization between the detection channels have critical effects on the Jones-matrix measurement.	OCT	60 63	0	1
31149385	2019	Then, we introduce a post processing algorithm to fuse the two results while enforcing the topology correctness.	fuse	50 54	0	1
31149392	2019	In majority of cases we never come across any complications arising from insertion of Ryles tube but in our experience at Eric Kharas memorial Burns center, Masina hospital we had two cases in which complications were encountered from inserting long Ryles tube.	Eric	122126	0	1
31149393	2019	For three-piece C-loop haptic intraocular lens, the capsular bag distention was almost equal in both posterior and peripheral directions, with mean peak deformation values reaching 39% and 38%.	bag	61 64	0	1
31149393	2019	Our model not only exposes the capsular bag for recording during implantation, but also objectively compares the individual movement values and reveals different zonular and capsular stress patterns, depending on intraocular lens model.	bag	40 43	0	1
31149396	2019	Upregulated differentially expressed genes were involved in Cell adhesion molecules (ICAM1, intercellular adhesion molecule 1) and tumor necrosis factor signaling pathway (FOS, FBJ osteosarcoma oncogene; ICAM1), while downregulated differentially expressed genes participated in PPAR signaling pathway (PPARG, peroxisome proliferator-activated receptor gamma).	FOS	172175	1	0
31149396	2019	A protein-protein interaction network was constructed, in which FOS, ICAM1 and PPARG were ranked as hub genes and PPARG was a transcription factor to regulate other target genes (ICAM1, FOS).	FOS	64 67	1	0
31149396	2019	A protein-protein interaction network was constructed, in which FOS, ICAM1 and PPARG were ranked as hub genes and PPARG was a transcription factor to regulate other target genes (ICAM1, FOS).	hub	100103	0	1
31149396	2019	A protein-protein interaction network was constructed, in which FOS, ICAM1 and PPARG were ranked as hub genes and PPARG was a transcription factor to regulate other target genes (ICAM1, FOS).	FOS	186189	1	0
31149396	2019	Conclusions: PPAR mediated signaling pathway may be an important mechanism for AHL.	PPAR	13 17	1	0
31149416	2015	Fluorine-18-deoxyglucose positron emission tomography/computed tomography showed strong FDG accumulation in the whole uterus, and on the bottom of the uterus, there was a ring-shaped accumulation mainly in the muscle layer.	FDG	88 91	0	1
31149421	2015	A 60-year-old female who was diagnosed with metastatic breast cancer (ER+ , PgR+ , HER2-, Ki67 <14 %, metastasized to lung, pleural, brain, subcutaneous tissue, and bone) was started on bevacizumab plus paclitaxel chemotherapy.	Ki67	90 94	1	0
31149426	2015	The pathological findings showed invasive breast cancer with lymph node metastasis (2/22), nuclear grade 3, ER (6+) PgR (2+) for the Allred score, and Her2 (2+) in an immunohistochemistry.	PgR	116119	1	0
31149433	2015	Pathology revealed a ruptured ACC.	ACC	30 33	0	1
31149433	2015	An urgent left adrenalectomy was performed and pathology showed a metastatic ruptured ACC.	ACC	86 89	0	1
31149433	2015	ACC is confirmed to be a lethal cancer.	ACC	0 3	0	1
31149454	2016	The TNM classification was T4aN1bM1, stage IVC.	TNM	4 7	0	1
31149461	2016	The endometrioid cancer and LCNendometrioid cancer components shared identical alterations in PTEN, PIK3CA and FGFR3.	PTEN	94 98	1	0
31149469	2016	These findings suggested that the reflux of pancreatic juice due to pancreaticobiliary maljunction only partially explained the carcinogenesis of CCs.	CCs	146149	0	1
31149475	2017	Clinical lymph node (N) stages cN1, cN2, and cN3 were observed in 1, 2, and 1 patient, respectively.	cN1	31 34	0	1
31149475	2017	Clinical lymph node (N) stages cN1, cN2, and cN3 were observed in 1, 2, and 1 patient, respectively.	cN2	36 39	0	1
31149475	2017	Among the specimens at the time of the primary tumors, 1, 2, and 1 were classified as pT1, pT2, and pT3, respectively.	pT1	86 89	0	1
31149475	2017	Among the specimens at the time of the primary tumors, 1, 2, and 1 were classified as pT1, pT2, and pT3, respectively.	pT3	100103	0	1
31149479	2017	A case report of ascending colon adenosquamous carcinoma with BRAF V600E mutation.	BRAF	62 66	1	0
31149479	2017	Biomarker analysis showed a microsatellite stable, wild-type KRAS gene in exon 2 and BRAF V600E mutation.	KRAS	61 65	1	0
31149479	2017	Biomarker analysis showed a microsatellite stable, wild-type KRAS gene in exon 2 and BRAF V600E mutation.	BRAF	85 89	1	0
31149484	2017	She was admitted because of liver chemistry abnormalities [AST 723 IU/L (normal range 7-37 IU/L);	AST	59 62	1	0
31149498	2017	We started the intravenous administration of antibiotics at hospitalization, because the laboratory data showed normal white blood cell values 3800/mul but a severe inflammatory reaction (CRP 25.13 mg/dl).	CRP	188191	1	0
31149498	2017	The fever and high CRP value continued, and the WBC rose to 14,500/mul at 20th day.	CRP	19 22	1	0
31149530	2019	Dihydropyrimidine dehydrogenase is an enzyme encoded by the DPYD gene, which is responsible for the rate-limiting step in pyrimidine catabolism and breaks down more than 80% of standard doses of 5-fluorouracil and capecitabine, an oral prodrug of 5-fluorouracil.	DPYD	60 64	1	0
31149539	2019	Pathological examination of the liver lesion revealed no structural or cellular atypia, no stromal invasion, and immunohistochemical positivity for CK7 and CK19, but negativity for p53.	CK7	148151	1	0
31149539	2019	Pathological examination of the liver lesion revealed no structural or cellular atypia, no stromal invasion, and immunohistochemical positivity for CK7 and CK19, but negativity for p53.	CK19	156160	1	0
31149539	2019	Pathological examination of the liver lesion revealed no structural or cellular atypia, no stromal invasion, and immunohistochemical positivity for CK7 and CK19, but negativity for p53.	p53	181184	1	0
31149549	2019	Four out of the seven cases were tested for the presence of P16, two for HPV;	P16	60 63	1	0
31149553	2019	We herein report a case of lung adenocarcinoma involving a patient with an EGFR exon 19 deletion mutation who developed leptomeningeal carcinomatosis after afatinib treatment for post-operative recurrence.	EGFR	75 79	1	0
31149553	2019	Because EGFR T790M was not detected in plasma cell-free DNA or cerebrospinal fluid, erlotinib and bevacizumab combination treatment was administered.	EGFR	8 12	1	0
31149564	2019	The light source used for narrow-band ultraviolet b phototherapy is the TL-01 lamp, and the most common model of the narrow-band ultraviolet b phototherapy device is the upright in-office booth or chamber which has 24-48 such lamps.	lamp	78 82	0	1
31149607	2019	PC1, PC2, and PC3 were selected to analyze the variations of the mandibular symphyseal shape.	PC1	0 3	0	1
31149607	2019	PC1, PC2, and PC3 were selected to analyze the variations of the mandibular symphyseal shape.	PC2	5 8	0	1
31149607	2019	PC1, PC2, and PC3 were selected to analyze the variations of the mandibular symphyseal shape.	PC3	14 17	0	1
31149607	2019	The structural equation model was constructed using the skeletal variables, PCs, and latent variables.	PCs	76 79	0	1
31149610	2019	This case report describes the treatment of a 25-year-old man with severe crowding and mild lip protrusion.	lip	92 95	0	1
31149610	2019	Although the crowding in the lower arch was severe enough to require first premolar extraction, distalization of the entire lower dentition with orthodontic mini-implants, extraction of the lower third molars, and interproximal stripping could successfully resolve the crowding and lip protrusion.	lip	282285	0	1
31149611	2019	Objectives: This study evaluated the effect of dentin pretreatment with silver nanoparticles and chlorhexidine on the microshear bond strength ( SBS) durability of different adhesives to dentin.	SBS	145148	0	1
31149611	2019	Half of the bonded surfaces in each group underwent SBS testing after 24 hours and the other half was tested after 6 months of water storage.	SBS	52 55	0	1
31149611	2019	Results: SNP application was associated with a higher SBS than was observed in the chlorhexidine and control groups for se bond after 24 hours (p < 0.05).	SBS	54 57	0	1
31149611	2019	A significantly lower SBS was observed when no dentin pretreatment was applied compared to dentin pretreatment with chlorhexidine and silver nanoparticles for SB after 24 hours (p < 0.05).	SBS	22 25	0	1
31149611	2019	The SBS values of the 6-month specimens were significantly lower than those obtained from the 24-hour specimens for all groups (p < 0.05).	SBS	4 7	0	1
31149650	2019	Finite element model simulations of convection around myobundles and oxygen metabolism by the myobundles in the 80 mul microphysiological system flow chamber agreed well with the oxygen consumption rate at different flow rates, suggesting that under basal conditions, mass transfer limitations were negligible for flow rates above 1.5 mul s-1.	mul	115118	0	1
31149650	2019	Finite element model simulations of convection around myobundles and oxygen metabolism by the myobundles in the 80 mul microphysiological system flow chamber agreed well with the oxygen consumption rate at different flow rates, suggesting that under basal conditions, mass transfer limitations were negligible for flow rates above 1.5 mul s-1.	mul	335338	0	1
31149655	2019	The PCP only stressed an urgent consultation among 211 patients (9%).	PCP	4 7	0	1
31149661	2019	More importantly, egg yolk partially normalized fatty acids profiles in serum, liver and fecaces and neutralized the HFD-induced upregulation of SREBP-1c, Acaca, Fasn, GPAT and Scd1.	Fasn	162166	1	0
31149661	2019	More importantly, egg yolk partially normalized fatty acids profiles in serum, liver and fecaces and neutralized the HFD-induced upregulation of SREBP-1c, Acaca, Fasn, GPAT and Scd1.	GPAT	168172	1	0
31149672	2019	Use of Fish Oil Nanoencapsulated with Gum Arabic Carrier in Low Fat Probiotic Fermented Milk.	Gum	38 41	0	1
31149672	2019	Gum arabic was used as the wall material for fish oil nanoencapsulation where tween 80 was applied as the emulsifier.	Gum	0 3	0	1
31149672	2019	The results showed that the nanoparticles encapsulated with 25% gum arabic and 4% emulsifier had the highest encapsulation efficiency (87.17%) and the lowest surface oil (31.66 mg/100 kg).	gum	64 67	0	1
31149689	2019	Isoleucine supplementation enhanced the concentrations of total plasma protein and IgA in pigs compared to the alanine control diet, while inhibiting the increase in plasma endotoxin and IL-6 contents induced by E. coli challenge.	IgA	83 86	1	0
31149761	2019	In this report, we used an in vivo murine adenocarcinoma model to validate the effects of As2 O3 and cisplatin on hexokinase activity and autophagic cancer cell death.	As2	90 93	0	1
31149761	2019	Interestingly, combining As2 O3 with cisplatin synergistically enhanced these effects and alleviated oxidative stress often encountered in As2 O3 treatment.	As2	25 28	0	1
31149761	2019	Interestingly, combining As2 O3 with cisplatin synergistically enhanced these effects and alleviated oxidative stress often encountered in As2 O3 treatment.	As2	139142	0	1
31149761	2019	Altogether, our data provide direct evidence that inhibition of hexokinase activity and induction of autophagic cell death are mediating the antineoplastic effects of As2 O3 and cisplatin.	As2	167170	0	1
31149761	2019	Our findings raise the potential of combining As2 O3 with cisplatin as an approach to augment cisplatin-induced cell death and combat cisplatin chemoresistance in cancer.	As2	46 49	0	1
31149778	2019	AIM: To identify and examine the factors that contribute to a successful CLP.	CLP	73 76	0	1
31149778	2019	Studies were not limited by year and were included if the focus was CLP attributes.	CLP	68 71	0	1
31149778	2019	Institution's organizational culture was identified as the overarching attribute contributing to a successful CLP.	CLP	110113	0	1
31149778	2019	Each of these components can play a significant role in the overall success of a CLP.	CLP	81 84	0	1
31149778	2019	LINKING EVIDENCE TO ACTION: While further research of a higher caliber is needed, some recommendations for practice can be made: (a) CLP description and terminology needs to be consistent with intent, (b) mandatory CLP engagement has positive implications, and (c) implementation needs to be driven by bedside nurses and includes both continuous education and refinement of program requirements and …	CLP	133136	0	1
31149778	2019	LINKING EVIDENCE TO ACTION: While further research of a higher caliber is needed, some recommendations for practice can be made: (a) CLP description and terminology needs to be consistent with intent, (b) mandatory CLP engagement has positive implications, and (c) implementation needs to be driven by bedside nurses and includes both continuous education and refinement of program requirements and …	CLP	215218	0	1
31149814	2019	In many aspects of the matrix-assisted laser desorption/ionization mass spectrometry imaging (MALDI MSI) technique, the discovery of new MALDI matrixes has been a major task for the improvement of ionization efficiency, signal intensity, and molecular coverage.	MSI	100103	0	1
31149814	2019	In this work, five analog compounds, including phthalhydrazide, 3-APH or luminol and its sodium salt, 4-aminophthalhydrazide, and 3-nitrophthalhydrazide were evaluated as potential matrixes for MALDI Fourier-transform ion cyclotron resonance MSI of metabolites in mouse brain tissue.	MSI	242245	0	1
31149814	2019	Compared with commonly used MALDI matrixes such as 2,5-dihydroxybenzoic acid, alpha-cyano-4-hydroxycinnamic acid, and 9-aminoacridine, 3-APH exhibited superior performance in dual polarity MALDI MSI, higher sensitivity, broader molecular coverage, and lower background noise.	MSI	195198	0	1
31149814	2019	The use of 3-APH led to on-tissue MALDI fourier-transform ion cyclotron resonance MSI of 159 and 207 mouse brain metabolites in the positive and negative ion modes, respectively.	MSI	82 85	0	1
31149814	2019	3-APH was further used for MALDI fourier-transform ion cyclotron resonance MSI of metabolic responses to ischemia-induced disturbances in mouse brain subjected to middle cerebral artery occlusion, thus revealing the alteration of 105 metabolites in the ipsilateral hemispheres.	MSI	75 78	0	1
31149816	2019	The dust ingestion estimates (g day-1) were derived from Nb, Ti, and V as best tracers and were 0.28 (geometric mean), 3.3 (mean), and 13 (P95);	P95	139142	0	1
31149839	2019	Our results showed that not only a total of 6 interactional variants in the paired 10 variants interactions were significantly associated with the development of of the femoral head (osteoprotegerin rs2073617 and NFATC1 rs754093, p < 0.019; osteoprotegerin rs2073618 and NFATC1 rs754093, p < 0.008; osteoprotegerin rs2073617 and rank ligand rs1054016, p < 0.039, respectively) but also a total of 4 …	OPG	536539	1	0
31149890	2019	Multiple antimicrobial resistance genes, including blaCMY-2, blaTEM-1B, aadA12, aph(3')-Ia, aph(3')-Ic, strA, strB, floR, sul1, sul2, and tet(A), along with spv operons were identified on these plasmids.	strA	104108	1	0
31149890	2019	Multiple antimicrobial resistance genes, including blaCMY-2, blaTEM-1B, aadA12, aph(3')-Ia, aph(3')-Ic, strA, strB, floR, sul1, sul2, and tet(A), along with spv operons were identified on these plasmids.	strB	110114	1	0
31149890	2019	Multiple antimicrobial resistance genes, including blaCMY-2, blaTEM-1B, aadA12, aph(3')-Ia, aph(3')-Ic, strA, strB, floR, sul1, sul2, and tet(A), along with spv operons were identified on these plasmids.	floR	116120	1	0
31149894	2019	Elevated serum glutamate oxalate transaminase and serum glutamate pyruvate transaminase, oxidative biomarker, decreased enzymatic and non-enzymatic antioxidants, Acetylcholinesterase activity and reduced percentage of spontaneous alternation behaviour (% SAB in Y-maze test) as well as reduced serotonin and dopamine levels and neurodegeneration were observed in HFHS diet-fed rats.	SAB	255258	0	1
31149894	2019	C. amada also controlled the level of dopamine and serotonin and reduced the neurodegeneration in the hippocampus CA1 region.	CA1	114117	0	1
31149899	2019	Identification of EOMES-expressing spermatogonial stem cells and their regulation by PLZF.	PLZF	85 89	1	0
31149899	2019	Long-term maintenance of spermatogenesis in mammals is supported by GDNF, an essential growth factor required for spermatogonial stem cell self-renewal.	GDNF	68 72	1	0
31149899	2019	Exploiting a transgenic GDNF overexpression model, which expands and normalizes the pool of undifferentiated spermatogonia between Plzf +/+ and Plzf lu/lu mice, we used RNAseq to identify a rare subpopulation of cells that express EOMES, a T-box transcription factor.	GDNF	24 28	1	0
31149899	2019	Exploiting a transgenic GDNF overexpression model, which expands and normalizes the pool of undifferentiated spermatogonia between Plzf +/+ and Plzf lu/lu mice, we used RNAseq to identify a rare subpopulation of cells that express EOMES, a T-box transcription factor.	Plzf	131135	1	0
31149899	2019	Exploiting a transgenic GDNF overexpression model, which expands and normalizes the pool of undifferentiated spermatogonia between Plzf +/+ and Plzf lu/lu mice, we used RNAseq to identify a rare subpopulation of cells that express EOMES, a T-box transcription factor.	Plzf	144148	1	0
31149899	2019	EOMES+ SSCs have a lower proliferation index in wild-type than in Plzf lu/lu mice, suggesting that PLZF regulates their proliferative activity and that EOMES+ SSCs are lost through proliferative exhaustion in Plzf lu/lu mice.	Plzf	66 70	1	0
31149899	2019	EOMES+ SSCs have a lower proliferation index in wild-type than in Plzf lu/lu mice, suggesting that PLZF regulates their proliferative activity and that EOMES+ SSCs are lost through proliferative exhaustion in Plzf lu/lu mice.	PLZF	99103	1	0
31149899	2019	EOMES+ SSCs have a lower proliferation index in wild-type than in Plzf lu/lu mice, suggesting that PLZF regulates their proliferative activity and that EOMES+ SSCs are lost through proliferative exhaustion in Plzf lu/lu mice.	Plzf	209213	1	0
31149899	2019	Single cell RNA sequencing of EOMES+ cells from Plzf +/+ and Plzf lu/lu mice support the conclusion that SSCs are hierarchical yet heterogeneous.	Plzf	48 52	1	0
31149899	2019	Single cell RNA sequencing of EOMES+ cells from Plzf +/+ and Plzf lu/lu mice support the conclusion that SSCs are hierarchical yet heterogeneous.	Plzf	61 65	1	0
31149901	2019	MEG and EEG source reconstruction have revealed sources of pathological brain activity associated with epileptiform discharges in the perisylvian region pointing to the significance of this brain area for ECSWS.	MEG	0 3	0	1
31149905	2019	The change in HSF cellular behaviors, such as cell proliferation, migration, and protein expression of scar-related molecules, was evaluated by cell counting assay, scratch wound assay, enzyme-linked immunosorbent assay, and western blotting.	HSF	14 17	0	1
31149905	2019	Chyle fat-derived stem cells conditioned medium inhibited HSF proliferation and migration.	HSF	58 61	0	1
31149939	2019	To Prevent IBD in Children, Let the Sunshine in?	IBD	11 14	0	1
31149948	2019	DESIGN: Secondary analysis of longitudinal STI data obtained from MSM attending an STD Clinic in Seattle, Washington, USA, October 2011-September 2017.	STD	83 86	0	1
31149948	2019	METHODS: We identified patients obtaining preexposure prophylaxis through the STD Clinic, and used propensity score matching to select a historical group of similar patients not using preexposure prophylaxis for comparison.	STD	78 81	0	1
31150057	2019	Gestational Diabetes Epigenetically Reprograms the Cart Promoter in Fetal Ovary, Causing Subfertility in Adult Life.	Cart	51 55	1	0
31150072	2019	Self-reported exposure to violent media was positively associated with total trigger pulls (incidence rate ratio [IRR], 1.40; 95% CI, 1.00-1.98) and trigger pulls at oneself or one's partner (IRR, 1.88; 95% CI, 1.29-2.72).	IRR	114117	0	1
31150072	2019	Self-reported exposure to violent media was positively associated with total trigger pulls (incidence rate ratio [IRR], 1.40; 95% CI, 1.00-1.98) and trigger pulls at oneself or one's partner (IRR, 1.88; 95% CI, 1.29-2.72).	IRR	192195	0	1
31150072	2019	Trait aggression was positively associated with total trigger pulls (IRR, 13.52; 95% CI, 3.14-58.29), trigger pulls at oneself or one's partner (IRR, 25.69; 95% CI, 5.92-111.39), and time spent holding a handgun (IRR, 4.22; 95% CI, 1.62-11.02).	IRR	69 72	0	1
31150072	2019	Trait aggression was positively associated with total trigger pulls (IRR, 13.52; 95% CI, 3.14-58.29), trigger pulls at oneself or one's partner (IRR, 25.69; 95% CI, 5.92-111.39), and time spent holding a handgun (IRR, 4.22; 95% CI, 1.62-11.02).	IRR	145148	0	1
31150072	2019	Trait aggression was positively associated with total trigger pulls (IRR, 13.52; 95% CI, 3.14-58.29), trigger pulls at oneself or one's partner (IRR, 25.69; 95% CI, 5.92-111.39), and time spent holding a handgun (IRR, 4.22; 95% CI, 1.62-11.02).	IRR	213216	0	1
31150083	2019	The UN10 rule, a CDR that uses 3 intra-arrest variables, has been shown to predict a poor chance of survival to discharge.	CDR	17 20	0	1
31150083	2019	Objective: To assess the performance of a parsimonious CDR in a national cohort of individuals with in-hospital cardiac arrest.	CDR	55 58	0	1
31150083	2019	The CDR indicates futility if all 3 criteria are met.	CDR	4 7	0	1
31150083	2019	This CDR was analyzed according to the Consolidated Health Economic Evaluation Reporting Standards reporting guideline.	CDR	5 8	0	1
31150084	2019	Compared with participants in the clinical management arm, patients who participated in group psychotherapy were associated with less severe symptoms as measured by the self-reported attention-deficit/hyperactivity disorder Symptoms Total Score according to the Diagnostic and Statistical Manual of Mental Disorders (Fourth Edition) (DSM-IV) of Conners Adult attention-deficit/hyperactivity disorder…	AMD	414417	0	1
31150084	2019	Compared with participants in the clinical management arm, patients who participated in group psychotherapy were associated with less severe symptoms as measured by the self-reported attention-deficit/hyperactivity disorder Symptoms Total Score according to the Diagnostic and Statistical Manual of Mental Disorders (Fourth Edition) (DSM-IV) of Conners Adult attention-deficit/hyperactivity disorder…	AMD	626629	0	1
31150132	2019	A volume of 30 muL serum was used for easy sample clean-up, based on protein precipitation with acetonitrile followed by online solid-phase extraction.	muL	15 18	0	1
31150205	2019	With the assistance of several electronic components, the SApEC could control alarms, such as a warning lamp.	lamp	104108	0	1
31150295	2019	METHODS: Adolescent females with posttraumatic stress disorder from a sexual assault (55% Black, 15.3 years, SD = 1.5) were randomized to either prolonged exposure therapy for adolescents (PE-A, n= 31) or client-centered therapy (CCT, n = 30).	CCT	230233	0	1
31150295	2019	The Time in Treatment Condition interaction was significant (p < .05, d = 0.52), indicating a significantly steeper reduction in suicidal ideation in PE-A compared to in CCT.	CCT	170173	0	1
31150295	2019	CONCLUSIONS: Adolescents randomized to PE-A had significantly faster reductions in suicidal ideation compared to those randomized to CCT.	CCT	133136	0	1
31150358	2019	Methods This retrospective study of multiple medical centers in Japan included individuals aged <20 years diagnosed with germline RET mutations between 1997 and 2017.	RET	130133	0	1
31150387	2019	Implicit solvent tCONCOORD conformational ensembles revealed the dynamic architecture of inactive kinase domains was co-opted in the activated dimer but the network hub shifted from the nucleotide binding cleft to the captured peptide.	hub	165168	0	1
31150389	2019	The global strategy to control STH infections requires periodic mass drug administration based on prevalence among populations at risk determined by diagnostic testing.	STH	31 34	0	1
31150389	2019	Widely used copromicroscopy methods to detect infection, however, have low sensitivity as the prevalence and intensity of STH infections decline with repeated mass drug administration.	STH	122125	0	1
31150389	2019	Using an integrated product development process, PATH conducted qualitative and quantitative formative research to inform the design and development of a more sensitive test for STH infections.	STH	178181	0	1
31150389	2019	Interviews highlighted features, motivations and concerns that are important for guiding design and implementation of new STH diagnostics.	STH	122125	0	1
31150389	2019	Market sizing in 2016 was estimated around half a million tests for lower STH burden countries, and 1-2 million tests for higher STH burden countries.	STH	74 77	0	1
31150389	2019	Market sizing in 2016 was estimated around half a million tests for lower STH burden countries, and 1-2 million tests for higher STH burden countries.	STH	129132	0	1
31150389	2019	The cost of commodities per patient for a molecular STH diagnostic may be around $10, 3-4 times higher than copromicroscopy methods, though savings may be possible in time and staffing requirements.	STH	52 55	0	1
31150389	2019	A largely subsidized STH control strategy and a semi-functional Kato-Katz test may have created few incentives for manufacturers to innovate in STH diagnostics.	STH	21 24	0	1
31150389	2019	A largely subsidized STH control strategy and a semi-functional Kato-Katz test may have created few incentives for manufacturers to innovate in STH diagnostics.	STH	144147	0	1
31150389	2019	Diverse partnerships, as well as balancing needs and expectations for new STH diagnostics are necessary to ensure access to needed products.	STH	74 77	0	1
31150397	2019	Unpleasant linguistic stimuli elicited a posterior negativity as compared to neutral stimuli, but no effect of regulation on ERP was detectable.	ERP	125128	0	1
31150408	2019	In rats, two behavioural pain scales, the Rat Grimace Scale (RGS, a facial expression scale) and a composite behaviour score (CBS, a behavioural ethogram reliant on postural changes), are both promising pain assessment methods.	RGS	61 64	0	1
31150408	2019	In rats, two behavioural pain scales, the Rat Grimace Scale (RGS, a facial expression scale) and a composite behaviour score (CBS, a behavioural ethogram reliant on postural changes), are both promising pain assessment methods.	CBS	126129	0	1
31150408	2019	Both CBS and RGS scores increased significantly at all post surgical timepoints in the saline group.	CBS	5 8	0	1
31150408	2019	Both CBS and RGS scores increased significantly at all post surgical timepoints in the saline group.	RGS	13 16	0	1
31150408	2019	Both buprenorphine and meloxicam reduced CBS scores to baseline levels following laparotomy;	CBS	41 44	0	1
31150408	2019	However, RGS scores were only reduced following buprenorphine.	RGS	9 12	0	1
31150408	2019	RGS scores in the meloxicam group remained similar to scores of the saline group.	RGS	0 3	0	1
31150408	2019	These findings suggest that the CBS and RGS differ in their sensitivity to discriminating analgesic effects.	CBS	32 35	0	1
31150408	2019	These findings suggest that the CBS and RGS differ in their sensitivity to discriminating analgesic effects.	RGS	40 43	0	1
31150422	2019	Induction of Elf3 and activation of RII-Smad3 signaling, leading to a decrease in WT1 expression, were observed in podocytes in diabetic human kidneys.	WT1	82 85	1	0
31150435	2019	The recombinant water-soluble variant of Lynx1 without a GPI-anchor (ws-Lynx1) inhibited the growth of A549 cells causing cell cycle arrest via modulation of alpha7-nicotinic acetylcholine receptors and activation of different intracellular signaling cascades, including PKC/IP3, MAP/ERK, p38, and JNK pathways.	p38	289292	1	0
31150435	2019	The recombinant water-soluble variant of Lynx1 without a GPI-anchor (ws-Lynx1) inhibited the growth of A549 cells causing cell cycle arrest via modulation of alpha7-nicotinic acetylcholine receptors and activation of different intracellular signaling cascades, including PKC/IP3, MAP/ERK, p38, and JNK pathways.	JNK	298301	1	0
31150451	2019	A total of one hundred and fifty patients with acute myocardial infarction after PCI who met the inclusion criteria were randomly divided into an experimental (n = 75) group and a control (n = 75) group.	PCI	81 84	0	1
31150451	2019	CONCLUSION: Transitional health management effectively improved adherence in elderly patients with acute myocardial infarction after PCI, ameliorated clinical indicators, and effectively reduced the incidence of adverse cardiovascular events and readmission rates.	PCI	133136	0	1
31150451	2019	Transitional health management was an effective intervention for PCI patients after discharge.	PCI	65 68	0	1
31150459	2019	Adenosine can activate four subtypes of adenosine receptors (A1, A2A, A2B and A3) and has been implicated in diabetic nephropathy.	A2A	65 68	1	0
31150464	2019	The distribution of TPA allelic profiles identified in the Czech Republic from 2004 to 2017 revealed a dynamic character with allelic profiles disappearing and emerging over time.	TPA	20 23	0	1
31150466	2019	MATERIALS AND METHODS: The authors retrospectively analysed objective (contrast-to-noise ratio (CNR)) and subjective (4-point Likert scale) image quality of CTs after i.o.	CNR	96 99	0	1
31150466	2019	MATERIALS AND METHODS: The authors retrospectively analysed objective (contrast-to-noise ratio (CNR)) and subjective (4-point Likert scale) image quality of CTs after i.o.	CTs	157160	0	1
31150466	2019	The image noise and CNR had no significant difference between the two groups.	CNR	20 23	0	1
31150475	2019	We used a task where we dissociated inhibition online (i.e., RTs for updating and controlling inhibition from the same set) and offline (i.e., RTs for controlling inhibition from previously updated sets).	RTs	61 64	0	1
31150475	2019	We used a task where we dissociated inhibition online (i.e., RTs for updating and controlling inhibition from the same set) and offline (i.e., RTs for controlling inhibition from previously updated sets).	RTs	143146	0	1
31150485	2019	Cutaneous leishmaniasis occurs, among others, in unpredictable outbreaks after wars and disasters.	wars	79 83	0	1
31150486	2019	Average r2 and |D'| between adjacent SNP pairs across all chromosomes was 0.27 and 0.66 for AZI, 0.29 and 0.68 for KHU, and 0.32 and 0.72 for MAZ.	MAZ	142145	0	1
31150486	2019	The linkage disequilibrium between the SNPs decreased with increasing physical distance from 100Kb to 1Mb between markers, from 0.234 to 0.018 for AZI, 0.254 to 0.034 for KHU, and 0.297 to 0.119 for MAZ, respectively.	MAZ	199202	0	1
31150486	2019	Estimated effective population sizes for AZI, KHU and MAZ were 477, 212 and 32, respectively, for recent generations.	MAZ	54 57	0	1
31150486	2019	The estimated effective population sizes indicate that the MAZ is at risk and requires careful management.	MAZ	59 62	0	1
31150492	2019	Surprisingly, a subsequent high-throughput screen of a kinase-relevant compound library (6,624 compounds) yielded few hits (8 hits; final hit rate 0.12%).	hits	118122	0	1
31150492	2019	Surprisingly, a subsequent high-throughput screen of a kinase-relevant compound library (6,624 compounds) yielded few hits (8 hits; final hit rate 0.12%).	hits	126130	0	1
31150492	2019	Further work will therefore be necessary to explore this unique kinetochore kinase as well as to assess whether the few hits identified can be developed into tool molecules or new drugs.	hits	120124	0	1
31150494	2019	PPS is a mixture of semisynthetic sulfated polyanions that have been shown to have anti-inflammatory effects in mucopolysaccharidosis type I and II patients and animal models of type I, IIIA and VI.	PPS	0 3	0	1
[truncated: 13,975 more rows]

## Sheet: Genes_Proteins (no repeats)
PMID	Year	Sentence	Dictionary Name	Position	True	False
[truncated: 14,788 more rows]

## Sheet: Diseases_SEffects
PMID	Year	Sentence	Dictionary Name	Position	True	False
[truncated: 15,794 more rows]

[truncated: 7 more sheets: Diseases_SEffects (no repeats), Drugs_Metabolites, Drugs_Metabolites (no repeats), Pathways, Pathways (no repeats), Cell_components, Cell_components (no repeat)]
