# Supplementary material for: The New Version of the ANDDigest Tool with Improved AI-Based Short Names Recognition
Source: Int J Mol Sci. 2022 Nov 29;23(23):14934. doi: 10.3390/ijms232314934 (PMC9738852; doi:10.3390/ijms232314934)
Supplement: Supplementary file 1 [file ijms-23-14934-s001.zip › Supplementary_File_S5.xlsx]

## Sheet: COVID_all_genes
Object id	Object label	Documents Number	Co-occurrence Score (p-value)	FDR
7806A3A12247757	angiotensin-converting enzyme 2	2587	0	0
7806A3A12239531	TMPRSS2	522	0	0
2245782A3A38933122	Nucleoprotein	513	3.56138e-08	2.490122e-06
2245782A3A38933110	spike glycoprotein	485	6.23809e-08	3.187754e-06
7806A3A12234700	S protein	344	0	0
8164A3A13886575	angiotensin-converting enzyme 2	332	4.09404e-08	2.642691e-06
2245782A3A38933113	orf1ab	183	0	0
7806A3A12236721	IL6	169	4.12324e-08	2.642691e-06
7806A3A12237799	furin	156	0	0
7806A3A12236768	c-x-c motif chemokine ligand 10	130	1.46594e-08	1.208004e-06
7806A3A12236710	interleukin-1 receptor antagonist	116	4.63945e-08	2.817041e-06
7806A3A12236730	interleukin-6 receptor	107	1.78172e-08	1.434077e-06
7806A3A12243888	AST	106	3.61518e-08	2.490122e-06
2245782A3A38933108	orf8	100	0	0
2245782A3A38933117	ORF3a	98	0	0
7806A3A12236631	interferon beta	96	3.1201e-08	2.347536e-06
7806A3A12235286	DPP4	95	4.45569e-08	2.773324e-06
7806A3A12235164	ACE1	79	0	0
7806A3A12239554	cTnI	73	0	0
7806A3A12250893	NLRP3	67	5.33788e-08	2.979742e-06
7806A3A12234398	CD147	67	0	0
8164A3A13879363	TMPRSS2	65	0	0
7806A3A12235065	cathepsin L	63	0	0
7806A3A12238860	MCP1	63	0.0197978	0.1768859
7806A3A12236708	IL1beta	54	0.999993	1
7806A3A12239800	S-protein	51	3.66935e-08	2.490122e-06
7806A3A12235513	ESR	51	0.0155186	0.1451618
7806A3A12240698	NRP1	51	0	0
7806A3A12239771	PCT	49	1.07862e-08	9.823957e-07
7806A3A12236722	IL8	47	0.000834126	0.01937524
7806A3A12237928	PF4	47	0	0
7806A3A12242547	ADAMTS13	47	5.94499e-08	3.187754e-06
7806A3A12244991	programmed death-ligand 1	44	0.999988	1
7806A3A12241676	nsp3	44	0	0
7806A3A12239298	ADAM17	43	1.3267e-08	1.119929e-06
7806A3A12237606	NFkappaB	41	0.0232199	0.1941161
2245782A3A38933106	ORF7a	41	7.27496e-08	3.546287e-06
7806A3A12270293	PD-1	40	0.361895	0.9985468
7806A3A12238861	RANTES	40	0.167977	0.6945859
7806A3A12236613	IFN-alpha	40	0.397442	1
7806A3A12238041	tPA	39	0.978639	1
7806A3A12235061	Cathepsin B	39	2.14502e-06	7.897781e-05
7806A3A12245501	Toll-like receptor 7	37	0	0
7806A3A12238287	protein S	37	0.00108596	0.02440589
2245782A3A38933121	Non-Structural Protein 6	37	4.02183e-08	2.642691e-06
8157A3A13983658	angiotensin-converting enzyme 2	37	0	0
7869A3A12505299	ACE2	36	4.38705e-09	4.338166e-07
7806A3A12247888	steep	36	2.11924e-05	0.0007052586
7806A3A12253120	helicase	35	7.99444e-08	3.790241e-06
7806A3A12233855	ABO	34	0.00321603	0.06149547
7806A3A12235005	G-CSF	33	0.999987	1
7806A3A12236752	IL17	32	0.801772	1
7806A3A12237677	BNP	32	1.27432e-05	0.0004366754
7806A3A12236734	IL10	31	0.869472	1
7806A3A12239797	ARB	31	9.04273e-07	3.597344e-05
7806A3A12293628	IL-7	29	0.000810569	0.01895527
7806A3A12250801	mL-1	29	0.940345	1
7806A3A12239541	DIF	29	0.821999	1
2245782A3A38933109	ORF7b	28	0	0
7806A3A12239235	signal transducer and activator of transcription 1	27	0.113161	0.5523981
2245782A3A38933105	ORF 10	27	5.25484e-08	2.979742e-06
7806A3A12233993	angiotensin II type 1 receptor	26	0.000457418	0.01114876
7806A3A12234427	C5a	26	0.0601949	0.369381
7806A3A12236399	HMGB1	25	0.201117	0.7622682
7806A3A12240791	Wave 1	25	0	0
7806A3A12234417	complement C3	24	0.965836	1
7806A3A12234523	caspase-1	24	0.375975	1
7806A3A12237812	PAI-1	24	0.945694	1
7806A3A12239671	prealbumin	24	0.999876	1
7806A3A12237983	Alpha-1-antitrypsin	24	0.99988	1
7806A3A12234065	Ang	24	0.0164865	0.1526884
7806A3A12248932	ALP	23	0.152648	0.6612199
7806A3A12243361	RIG-1	23	0	0
7806A3A12236746	IL-15	23	0.613885	1
7806A3A12236593	intercellular adhesion molecule 1	23	0.68684	1
7806A3A12237275	CXCL9	23	0.00269606	0.0536268
7806A3A12285419	RBC	22	0.967774	1
7806A3A12236672	IgG3	22	0.528043	1
7806A3A12236274	granzyme B	22	0.52566	1
7806A3A12243307	Cabin	22	0.1275	0.6003776
7806A3A12239518	toll-like receptor-3	22	0.0476505	0.3175722
7806A3A12237437	Krebs von den Lungen-6	22	0.99994	1
7806A3A12236756	IL18	21	0.349211	0.9842176
7806A3A12241990	IFITM3	21	2.72023e-08	2.092159e-06
7806A3A12234093	ANPEP	21	0.0550584	0.3483677
7806A3A12237454	MX1	20	3.13209e-06	0.000114107
7806A3A12236789	IRF3	20	1.42265e-06	5.41076e-05
7806A3A12245988	CD20	20	0.999994	1
7806A3A12236711	IL1	20	0.999719	1
7806A3A12250591	SPECC1	20	6.26314e-08	3.187754e-06
7806A3A12250427	IL-33	19	0.203801	0.7685117
7806A3A12238862	MIP1A	19	0.288709	0.9034556
7806A3A12239780	vascular cell adhesion molecule-1	19	0.999861	1
7806A3A12247753	iceberg	19	3.51387e-05	0.001115734
7806A3A12236531	GRP78	19	0.0929756	0.4951206
7818A3A12304813	ACE2	19	9.30206e-08	4.236109e-06
2245782A3A38933114	membrane glycoprotein	19	0	0
7806A3A12239806	vWF	18	0.0643458	0.3842115
7806A3A12238225	protein C	18	0.999683	1
7806A3A12241674	nsp1	18	6.87433e-09	6.608904e-07
8164A3A13877603	TNF- alpha	18	1	1
7806A3A12237173	Mas	18	3.59552e-08	2.490122e-06
7806A3A12262074	GGT	18	0.0128003	0.1319171
7806A3A12239478	thrombomodulin	18	0.578521	1
7806A3A12235565	thromboplastin	18	0.75497	1
8164A3A13875504	furin	18	4.86974e-05	0.001487444
7806A3A12236713	IL2	18	1	1
7806A3A12234598	CD19	18	0.972987	1
7806A3A12234064	angiopoietin-2	17	0.179085	0.7148941
7806A3A12245673	IL-23	17	0.900924	1
7806A3A12236630	IFNAR2	17	6.07189e-08	3.187754e-06
7806A3A12237017	lipocalin-2	17	0.947944	1
7806A3A12246259	SARS	17	0	0
7806A3A12235425	neutrophil elastase	17	0.964571	1
7806A3A12235606	CD16	16	0.961376	1
7806A3A12247755	IL-21	16	0.325354	0.9415135
7806A3A12236800	CD25	16	0.994487	1
7806A3A12234632	CD68	16	0.99985	1
7806A3A12245144	CD209	16	3.40378e-05	0.001090785
7806A3A12240466	APOL 1	16	5.17813e-07	2.133513e-05
7806A3A12239514	Toll	16	0.20663	0.7732831
7806A3A12234618	CD38	16	0.973776	1
7806A3A12241921	CD209L	16	4.48732e-08	2.773324e-06
7685A3A11917334	angiotensin-converting enzyme-2	16	0	0
7806A3A12239789	Vascular endothelial growth factor A	16	0.999997	1
7806A3A12235560	FVIII	15	0.85667	1
7806A3A12238807	EN-RAGE	15	0.0235783	0.1961647
7806A3A12241071	CD163	15	0.359131	0.9985468
7806A3A12236638	IFNG	15	0.64489	1
7806A3A12254160	PCSK9	15	0.809081	1
7806A3A12254396	interferon-lambda1	15	3.71355e-07	1.576874e-05
7806A3A12238863	MCP-3	15	0.000486298	0.01168804
7806A3A12236961	cytokeratin 18	15	0.124882	0.5899187
7806A3A12238823	SAA	15	0.00228845	0.0460484
7806A3A12247674	Hepcidin	15	0.801181	1
7806A3A12241309	ubiquitin-like ISG15 protein	15	1.05852e-06	4.163111e-05
7806A3A12238868	eotaxin	15	0.380467	1
7806A3A12238147	PPARgamma	15	1	1
7806A3A12234000	angiotensinogen	15	0.770719	1
7806A3A12243991	tim	14	0.230196	0.8188164
7806A3A12233994	aHR	14	0.081977	0.4517873
7806A3A12242653	eta2	14	0.000179988	0.004755255
7806A3A12236850	JAK1	14	0.0384258	0.2788086
7806A3A12235604	FcgammaRIIA	14	0.0177998	0.1634088
7943A3A13191790	ACE2	14	7.65321e-08	3.678856e-06
7806A3A12234002	AGTR2	14	1.78518e-07	7.921164e-06
7806A3A12247113	TMPRSS4	14	0	0
7806A3A12247972	IFIH1	14	6.00399e-05	0.00180694
7806A3A12234633	CD69	14	0.794142	1
7806A3A12234308	bat	14	3.32967e-08	2.451912e-06
7806A3A12237561	neurofilament light chain	14	0.0479891	0.3175722
7806A3A12236357	HIF1a	14	1	1
7806A3A12234604	CD86	13	0.999839	1
7806A3A12240356	NSP2	13	6.19089e-08	3.187754e-06
8164A3A13899999	NLRP3	13	0.996012	1
7806A3A12236409	HO-1	13	0.892435	1
7806A3A12238415	CD45	13	0.999996	1
7806A3A12234292	AXL	13	0.0343761	0.25306
7806A3A12236603	CFI	13	0.00674243	0.0764215
7806A3A12237184	mannose-binding lectin	13	0.187845	0.7354528
7806A3A12234408	Bruton tyrosine kinase	13	0.232533	0.8198126
7806A3A12235590	Fab	13	0.98294	1
7806A3A12237907	Platelet Endothelial Cell Adhesion Molecule	13	0.999999	1
7806A3A12247487	MAVS	12	1.04722e-05	0.0003624428
7806A3A12236199	CXCL1	12	0.718304	1
7806A3A12248956	NTD	12	6.02894e-08	3.187754e-06
7806A3A12250029	TIM-3	12	0.093882	0.4953134
7806A3A12248145	P2Y12	12	0.984382	1
7806A3A12250154	ALB	12	0.00462029	0.0764215
7806A3A12236823	CD11b	12	0.999973	1
7806A3A12237030	Galectin-3	12	0.977493	1
7806A3A12236482	Zonulin	12	0.999952	1
7806A3A12244190	PLT	12	0.0138965	0.1319171
8011A3A13370106	angiotensin-converting enzyme 2	12	0	0
7806A3A12237734	2'-5'-oligoadenylate synthetase 1	12	4.22284e-07	1.760873e-05
7806A3A12235003	M-CSF	12	0.567878	1
7806A3A12237294	mineralocorticoid receptor	12	0.996447	1
7806A3A12247183	FDP	12	3.81143e-05	0.001199214
7806A3A12241878	sigma-1 receptor	12	8.87466e-07	3.571535e-05
7806A3A12238802	S100A8	12	0.958422	1
7806A3A12246105	SLC6A20	11	4.81636e-08	2.873005e-06
7806A3A12250982	peptidase	11	0.07108	0.4127649
7806A3A12238061	plasminogen	11	1	1
8164A3A13887983	STING	11	0.00120444	0.02689398
7806A3A12234621	CD154	11	0.99838	1
7806A3A12235113	cytochrome P450 3A4	11	0.999731	1
7806A3A12237315	MOG	11	0.520677	1
7806A3A12245127	Tbx21	11	0.36382	1
7806A3A12238806	S100A9	11	0.796714	1
7806A3A12236363	Human Leukocyte Antigen -A	11	0.999975	1
7806A3A12234615	CD39	11	0.0349686	0.2558696
8164A3A13874136	IL6	11	0.999984	1
7806A3A12233922	ADAR-1	11	0.000333723	0.008369676
7806A3A12236204	CXCL2	10	0.0550545	0.3483677
7806A3A12239536	B12	10	0.976619	1
7806A3A12245913	Toll-like receptor 9	10	0.989662	1
7806A3A12240123	protein can	10	0.648327	1
7806A3A12245246	FoxP3	10	1	1
7806A3A12235053	CTLA4	10	1	1
7806A3A12242314	WAVE III	10	0.00366036	0.067848
7806A3A12234114	APOA1	10	1	1
7806A3A12250484	radical s-adenosyl methionine domain containing 2	10	7.48678e-07	3.048441e-05
7806A3A12234009	RAC-alpha serine/threonine-protein kinase	10	0.999996	1
7806A3A12239456	tissue factor pathway inhibitor	10	0.720969	1
8164A3A13874018	Cxcl10	10	0.965107	1
7806A3A12236616	IFIT1	10	0.00228471	0.0460484
7806A3A12238878	CCL20	10	0.398907	1
7806A3A12245198	MBL	10	0.00666828	0.0764215
7806A3A12240826	SOCS3	10	0.368457	1
7806A3A12237303	matrix metallopeptidase 9	9	1	1
7806A3A12238809	S100B	9	1	1
7806A3A12239082	acid sphingomyelinase	9	0.0560741	0.3535017
7806A3A12258225	MiR-146a	9	0.638294	1
7806A3A12237876	programmed cell death protein 1	9	0.999978	1
7806A3A12239085	CD169	9	2.18067e-05	0.0007187904
7806A3A12289856	CYP2D6	9	0.99998	1
7806A3A12236845	JAK-2	9	1	1
7806A3A12246573	SAPS 3	9	3.73602e-07	1.576874e-05
7806A3A12236714	IL1RA	9	0.00574684	0.0764215
7806A3A12242202	CXCR6	9	0.000345642	0.008606237
7806A3A12235367	eta	9	0.896417	1
7806A3A12245006	ASC	9	0.511272	1
8074A3A13744118	ACE2	9	0	0
7806A3A12255537	B0AT1	9	8.59313e-08	4.01903e-06
7806A3A12234707	cease	9	0.364472	1
7806A3A12245189	IL-22	9	0.982374	1
7806A3A12240246	G6PD	9	0.0812639	0.4485715
7806A3A12235843	Mechanistic target of rapamycin	9	0.573317	1
7806A3A12253553	TIGIT	9	0.0042112	0.07560187
7806A3A12237964	ABCB1	9	0.999999	1
7806A3A12236726	CXCR2	9	0.421252	1
7806A3A12236635	IFNAR1	9	0.00225275	0.0460484
7806A3A12250060	apo	9	0.955389	1
7806A3A12236376	HLA-DRB1	9	0.997992	1
7806A3A12238059	alpha 2-antiplasmin	9	0.987092	1
7806A3A12237327	MPO	9	0.323864	0.9415135
8164A3A13872858	DPP4	9	0.34311	0.9734154
7806A3A12237602	NFKBIA	9	0.999838	1
7806A3A12237000	lag 3	9	0.195753	0.74862
7806A3A12239288	spleen tyrosine kinase	8	0.792084	1
7806A3A12236816	CD61	8	0.538754	1
7806A3A12239509	toll-like receptor-2	8	0.937934	1
7806A3A12245527	TLR8	8	0.108765	0.5424145
7806A3A12240558	suppressor of cytokine signaling 1	8	0.356319	0.99727
7806A3A12236121	CXCR3	8	0.868851	1
7806A3A12242515	Arm 1	8	0.0608857	0.369381
7806A3A12237448	muL	8	0.627376	1
7806A3A12261473	MUC5B	8	0.112755	0.5519732
7806A3A12234727	CFTR	8	0.961332	1
7806A3A12239131	HGF	8	0.938822	1
7806A3A12234520	caspase 3	8	0.999999	1
8164A3A13879456	mug	8	0.998368	1
7806A3A12238006	CPK	8	0.426328	1
7806A3A12241960	interferon regulatory factor 9	8	8.71352e-05	0.002513124
8164A3A13877895	S-protein	8	0.186617	0.7347912
7806A3A12236725	IL9	8	0.623796	1
7806A3A12235458	ENPEP	8	0.00183846	0.03879823
7806A3A12236724	IL7	8	0.473056	1
7806A3A12238869	CCL4	8	0.822395	1
7806A3A12237955	placental growth factor	8	0.985679	1
7806A3A12244159	ST2	8	0.708907	1
7806A3A12238328	MHC-iota	8	0.00126983	0.02817232
7806A3A12236790	IRF1	8	0.434679	1
7806A3A12246142	ORF1	8	0.0192742	0.1760106
7806A3A12241213	GDF-15	8	0.832902	1
7806A3A12238228	AMPK	8	0.943919	1
8164A3A13874030	interferon beta	8	0.999972	1
7806A3A12234758	chitinase-3-like protein 1	8	0.818051	1
7806A3A12261888	CCR2	8	0.824537	1
8164A3A13874510	cytokeratin 18	8	0.0273423	0.2187644
7806A3A12240444	IFITM1	8	6.76946e-05	0.00201975
7806A3A12242262	MASP-2	8	0.0116625	0.1238157
7806A3A12233953	PARP-1	8	0.973714	1
7806A3A12238272	protein kinase R	8	0.124481	0.5899187
7806A3A12234078	protein-1	8	0.999092	1
7806A3A12239457	TGFbeta	8	1	1
7806A3A12246668	HR1	8	1.38401e-06	5.322287e-05
7806A3A12236546	HSPD1	8	0.957508	1
7806A3A12251957	ORF3	8	0.000122571	0.003448929
7806A3A12247883	muted	8	0.000550712	0.01305489
8164A3A13876537	CCL2	8	1	1
7806A3A12235505	FIB	8	0.0190601	0.1745159
7806A3A12234629	Min1	8	1	1
7806A3A12238884	CXCL11	7	0.343972	0.9734154
7806A3A12256391	MALAT1	7	0.553889	1
8164A3A13903565	K18	7	8.55441e-05	0.002487967
7806A3A12234607	CD28	7	0.999928	1
7806A3A12241087	CYP	7	0.996317	1
7806A3A12238936	SP-D	7	0.651196	1
7806A3A12238430	Pentraxin 3	7	0.455289	1
7806A3A12242351	hPa	7	0.989538	1
7806A3A12238149	cyclophilin A	7	0.335036	0.9606956
7806A3A12237299	Neprilysin	7	1	1
8918A3A14203275	nucleoprotein	7	6.49066e-08	3.255677e-06
8164A3A13881288	Th1-type	7	0.672781	1
7806A3A12236743	interleukin -13	7	0.947443	1
7806A3A12237526	CD56	7	0.999999	1
7806A3A12237301	matrix metalloproteinase-7	7	0.979676	1
7806A3A12236717	IL4	7	1	1
7806A3A12254738	Huh7	7	0.822643	1
7806A3A12236727	CD127	7	0.387839	1
7806A3A12236797	IRF7	7	0.0962381	0.5062007
7806A3A12254387	IFN-lambda3	7	0.924228	1
7806A3A12255536	STING	7	0.396864	1
7806A3A12239788	VDR	7	0.621139	1
7806A3A12234314	cholinesterase	7	1	1
7806A3A12241477	PD1	7	0.241079	0.832709
7806A3A12238917	CD62L	7	0.998934	1
7806A3A12248702	gasdermin D	7	0.0154114	0.1445497
7806A3A12238253	Mitogen-activated protein kinase 1	7	0.929904	1
7806A3A12234055	anti-Mullerian hormone	7	0.999861	1
7806A3A12235884	Glucose-6-phosphate dehydrogenase	7	0.999444	1
7806A3A12247439	doors	7	0.0640572	0.3835674
7806A3A12238494	RAGE	7	0.319478	0.9359449
7806A3A12233959	alpha1	7	0.985334	1
7806A3A12236729	CXCR1	7	0.880286	1
7806A3A12235654	fibrinogen gamma	7	0.035272	0.2575451
8164A3A13891902	toll-like receptor 9	7	0.998694	1
7806A3A12239236	signal transducer and activator of transcription 3	7	0.999939	1
7806A3A12239489	EPA	7	1	1
7806A3A12255582	pen	7	0.998989	1
7806A3A12236932	NKG2A	7	0.0327689	0.25306
7806A3A12237722	OAS2	7	2.59512e-05	0.0008473312
7806A3A12237696	CD73	7	0.999316	1
7806A3A12238383	Cyclooxygenase -2	7	0.999948	1
7806A3A12238870	CCL8	7	0.0474161	0.3175722
7806A3A12238077	aPR	7	0.246255	0.836397
7806A3A12238939	SFTPC	7	0.24418	0.8327751
7806A3A12236312	hemoglobin beta-chain	6	1	1
7806A3A12237307	MMP12	6	0.595447	1
7806A3A12241136	TMPRSS11D	6	0.0327176	0.25306
7806A3A12233955	adrenomedullin	6	0.996848	1
8157A3A13978311	TMPRSS2	6	5.29009e-10	6.103e-08
7806A3A12234425	complement C5	6	0.0221103	0.1870996
7806A3A12239460	CD71	6	0.99999	1
7806A3A12235718	FN1	6	0.636175	1
7806A3A12234159	arginase-1	6	0.724505	1
7806A3A12236362	HLA-B	6	0.997222	1
7806A3A12236538	HSP90AA1	6	0.0134367	0.1319171
7806A3A12238894	syndecan-1	6	0.994347	1
7806A3A12234616	CD36	6	0.998529	1
7806A3A12236763	IDO1	6	0.859875	1
7806A3A12235000	Sargramostim	6	0.995325	1
7806A3A12234829	CCR1	6	0.33814	0.9656702
7806A3A12236159	glutamic-pyruvic transaminase	6	0.953717	1
7806A3A12238896	CXCL12	6	1	1
7806A3A12237654	eNOS	6	0.996177	1
7806A3A12237039	Gal-9	6	0.144451	0.6360622
8164A3A13874126	IL-1b	6	1	1
7806A3A12245408	Arm 2	6	0.153934	0.6636949
8164A3A13876542	RANTES	6	0.999831	1
7806A3A12239237	STAT2	6	0.14166	0.6318684
7806A3A12234583	CD8A	6	0.0442048	0.3072145
7806A3A12237014	LBP	6	0.560293	1
8164A3A13898769	TLR3	6	0.979312	1
7806A3A12236619	interferon-alpha2	6	0.261385	0.8595188
7806A3A12236118	XCR1	6	0.000227465	0.005964063
7806A3A12242078	dance	6	0.663862	1
7806A3A12250717	MUC16	6	1	1
7806A3A12254442	NEAT1	6	0.0562292	0.353835
7806A3A12243274	BRD4	6	0.321059	0.9366102
7806A3A12242028	MERTK	6	0.281381	0.8909969
7806A3A12239474	THBS1	6	0.997393	1
7806A3A12239690	Tyrosine Kinase 2	6	0.186011	0.7332393
7995A3A13566528	ACE2	6	8.56437e-10	9.561705e-08
7806A3A12242969	CORD-19	6	4.80427e-12	5.938421e-10
7806A3A12234128	alpha-beta	6	1	1
7806A3A12242129	IFITM2	6	4.70409e-06	0.0001695922
7806A3A12236032	THP-1	6	0.999888	1
7806A3A12239432	Tie2	6	0.784901	1
383664A3A31263083	ACE2	6	3.1559e-11	3.766403e-09
7806A3A12241465	staring	6	0.0937024	0.4951206
7806A3A12237726	OAS3	6	3.00567e-05	0.0009722078
7806A3A12253995	IL-27	6	0.528393	1
7806A3A12258238	miRNA-155	6	0.991928	1
8164A3A13900968	RIG-I	6	0.0982741	0.5067228
7806A3A12245004	Tbk1	6	0.11351	0.5533213
7806A3A12237104	LY6E	6	0.000307887	0.007835271
7806A3A12246062	LZTFL1	6	4.15264e-09	4.227143e-07
7806A3A12237008	LAMP1	6	0.853758	1
7806A3A12238911	selenoprotein P	5	0.22621	0.8149302
7806A3A12241843	calcium binding and coiled-coil domain 2	5	0.097034	0.5067228
7806A3A12237080	ApoA	5	1	1
8164A3A13871997	CD147	5	0.149462	0.6490439
7806A3A12234682	CDK4	5	0.999998	1
8164A3A13876557	CXCL2	5	0.999997	1
7806A3A12239546	TNFR1	5	0.990331	1
7806A3A12234148	amphiregulin	5	0.781492	1
7806A3A12238621	BRD2	5	0.235098	0.8218931
7806A3A12238889	fractalkine	5	0.880826	1
7806A3A12239360	HNF4a	5	0.978925	1
7806A3A12236805	ITGA2B	5	0.815464	1
7806A3A12234606	CD80	5	1	1
7806A3A12249593	TMPRSS13	5	8.42646e-05	0.002471524
8164A3A13872097	caspase-1	5	1	1
7806A3A12235260	dornase alfa	5	0.99948	1
7806A3A12234413	C1 esterase inhibitor	5	0.625824	1
7806A3A12236671	IgA1	5	0.941309	1
7806A3A12234342	B2R	5	0.26362	0.8631872
7806A3A12251719	DRB1	5	0.976341	1
6354A3A9090000	ACE2	5	2.05057e-09	2.150613e-07
7806A3A12237300	matrix metalloproteinase-1	5	1	1
7806A3A12239850	XPO1	5	0.262306	0.859698
1057396A3A36178562	ORF1ab	5	1.44968e-06	5.453633e-05
7806A3A12240728	Apelin	5	0.668134	1
7806A3A12233991	Ags	5	0.996485	1
8164A3A13876620	CD-1	5	1	1
7806A3A12257694	NSP4	5	0.0600741	0.369381
8164A3A13872555	CatL	5	0.511719	1
7806A3A12243353	PADI4	5	0.216178	0.7966251
7806A3A12235488	DMT	5	0.00225644	0.0460484
7806A3A12241159	AIM2	5	0.287505	0.9015169
7806A3A12238309	Myeloblastin	5	0.997302	1
7806A3A12255454	CLEC4G	5	1.69799e-06	6.319079e-05
7806A3A12239230	STAT	5	0.990923	1
7806A3A12241013	enigma	5	0.971453	1
7806A3A12249544	Maestro	5	0.0161876	0.1506056
7806A3A12258266	mir-21	5	1	1
7806A3A12239548	TNFRSF1B	5	0.891645	1
7806A3A12239794	VIM	5	0.631426	1
7806A3A12239680	OX40	5	0.496114	1
7806A3A12234891	PARP	5	1	1
7806A3A12237461	MyD-88	5	0.995523	1
7806A3A12242101	endothelial protein C receptor	5	0.203841	0.7685117
7806A3A12235636	Fibrinogen-beta	5	0.111734	0.5517893
228404A3A28619437	nucleoprotein	5	1.33388e-07	5.995531e-06
7806A3A12272996	IFNL4	5	0.00795875	0.0863487
7806A3A12233885	beta-actin	5	0.999708	1
7806A3A12242116	IFI44	5	0.000728964	0.01716289
7806A3A12236621	IFIT3	5	0.00330921	0.06292954
7806A3A12260870	scFv	5	0.721299	1
7806A3A12234069	angiopoietin-1	5	0.977093	1
7806A3A12247391	SD1	5	0.000327852	0.008282451
7806A3A12237022	LAC	5	0.97053	1
7806A3A12239202	TRIM21	5	0.954358	1
7806A3A12234117	ApoE4	5	0.99979	1
7806A3A12235620	FcRn	5	0.99671	1
7806A3A12242548	Endocan	5	0.191749	0.7406733
7806A3A12241305	kallikrein	5	0.998494	1
7806A3A12244428	IGHV3-53	5	9.08997e-10	9.831371e-08
7806A3A12236720	IL5	5	0.999411	1
7806A3A12249932	IRF	5	0.259683	0.8595188
7806A3A12236709	IL2R	5	0.501337	1
7806A3A12234585	CD-6	5	0.518162	1
7806A3A12234132	FASLG	5	1	1
7806A3A12235609	CD64	5	0.962259	1
7806A3A12240459	PC2	5	0.140889	0.6318684
7806A3A12241432	GFR	5	0.727721	1
7806A3A12248486	FYCO1	5	5.37889e-06	0.000191921
7806A3A12234671	VE-cadherin	5	0.972725	1
7806A3A12238525	pRb	5	0.999936	1
7806A3A12245635	Th1-type	5	0.75739	1
7806A3A12250482	SOC	5	0.00361971	0.067848
8164A3A13875514	PD-1	5	0.999987	1
7806A3A12236931	high molecular weight kininogen	5	0.397955	1
7806A3A12235086	Nox2	5	0.963744	1
7806A3A12238254	MAPK8	4	0.677289	1
8164A3A13876287	p65 NF-kappaB	4	0.999992	1
7806A3A12233918	ADAM10	4	0.486254	1
7806A3A12235570	FABP2	4	0.0785348	0.4434077
8164A3A13874593	ANPEP	4	0.611798	1
7806A3A12234322	BCL2L1	4	0.685187	1
7806A3A12234842	CCR7	4	0.992055	1
7943A3A13191840	S protein	4	0.0208183	0.1768859
7806A3A12235608	FcgammaRIIb	4	0.534405	1
7806A3A12237015	LCK	4	0.814089	1
7806A3A12234086	annexin V	4	1	1
7806A3A12237265	major histocompatibility complex class II transactivator	4	0.185216	0.7309379
7806A3A12237852	SERPINA5	4	0.310996	0.9231193
7806A3A12234483	calcitonin	4	1	1
7806A3A12237128	SMAD3	4	0.999742	1
7806A3A12239233	STAT5	4	0.999837	1
7806A3A12259361	HNP1	4	0.000146565	0.003932259
7806A3A12237443	myxovirus resistance protein 2	4	0.0311831	0.2425274
7806A3A12258912	GPCR	4	0.983485	1
7806A3A12235720	PSMA	4	0.999985	1
7806A3A12237095	lymphotoxin alpha	4	0.996342	1
7806A3A12238886	CXCL5	4	0.725662	1
7806A3A12272862	AT1	4	0.633275	1
7806A3A12241156	pERK	4	0.94451	1
7806A3A12236165	glutathione peroxidase 3	4	0.639444	1
7806A3A12234525	caspase-9	4	1	1
7806A3A12251196	protein A	4	1	1
7806A3A12254024	irisin	4	0.796301	1
7806A3A12245906	ORF9	4	0.000162398	0.004323534
7806A3A12234814	CLUSTERIN	4	0.994041	1
7806A3A12245297	FIS1	4	0.022691	0.1906154
7806A3A12242149	SLCO1B1	4	0.925928	1
8164A3A13873831	high mobility group box-1	4	0.999998	1
7806A3A12235182	GADD45A	4	0.590887	1
7806A3A12235159	decorin	4	0.982283	1
7806A3A12246081	PARP14	4	0.0016058	0.03473546
7806A3A12238908	CD62P	4	0.952217	1
7806A3A12233998	fetuin-A	4	0.954416	1
7806A3A12290445	Env	4	0.999999	1
7806A3A12254393	IFN-lambda2	4	0.0165632	0.1528673
7806A3A12234033	ALK	4	1	1
7806A3A12233926	adenosine deaminase	4	1	1
7806A3A12234587	CD7	4	0.983065	1
7806A3A12237601	NRF-2	4	0.999502	1
8164A3A13912849	IgG2a	4	1	1
7806A3A12252753	spice	4	0.287631	0.9015169
7806A3A12236192	NR3C1	4	0.417635	1
7806A3A12237255	Matrix Gla protein	4	0.67041	1
7806A3A12239188	SREBP2	4	0.443881	1
7806A3A12274758	MinION	4	0.0824479	0.4536601
7806A3A12241801	protein 14	4	0.00129505	0.02854884
8164A3A13881026	Tbk1	4	0.397372	1
7806A3A12235360	Sphingosine-1-phosphate receptor 1	4	0.578837	1
7806A3A12234582	CD2	4	0.999994	1
7806A3A12239696	UBA1	4	0.0311831	0.2425274
7806A3A12238175	PPP1CA	4	0.00284255	0.0558981
7806A3A12240100	Lp-PLA2	4	0.552744	1
7806A3A12234139	AQP4	4	0.998607	1
7806A3A12235632	FGA	4	0.609221	1
7806A3A12247946	Vista	4	0.206472	0.7732831
8164A3A13902656	IL-27	4	0.824279	1
7806A3A12238128	ESA	4	0.999993	1
7806A3A12256236	GST	4	0.999659	1
7806A3A12235557	FXa	4	0.489232	1
7806A3A12234603	CD27	4	0.949213	1
7806A3A12236382	HLA-DRA	4	0.613083	1
7806A3A12235964	GBP1	4	0.0241606	0.19957
7806A3A12236367	HLA-C	4	0.967996	1
8164A3A13872303	SOCS3	4	0.987752	1
7806A3A12239497	ZO-1	4	0.995226	1
8164A3A13873599	CXCL1	4	0.998839	1
7806A3A12252237	Nov 1	4	0.000238174	0.006197896
7806A3A12248374	RLR	4	0.00380312	0.07001382
7806A3A12236273	GZMA	4	0.372279	1
8164A3A13875099	MyD88	4	0.999997	1
7806A3A12235877	CD15	4	0.989334	1
7806A3A12237792	P2X7	4	0.746301	1
7806A3A12236923	KIR	4	0.866248	1
7806A3A12243255	TDP-43	4	0.999359	1
7806A3A12234997	p38alpha	4	0.504011	1
8164A3A13875896	PTGS2	4	0.999996	1
7806A3A12235399	EGR1	4	0.996322	1
7806A3A12239439	TERT	4	0.999999	1
7806A3A12236386	HLA-E	4	0.505479	1
7806A3A12237823	pregnancy-associated plasma protein A	4	0.975289	1
7806A3A12255444	Nos2	4	0.706994	1
7806A3A12242215	BAFF	4	0.99852	1
7806A3A12242427	ANA	4	0.842622	1
7806A3A12241222	MAS1	4	0.000146565	0.003932259
7806A3A12238617	RNASEL	4	0.203598	0.7685117
7806A3A12236716	interleukin-3	4	1	1
7806A3A12238767	RAS-related	4	0.381704	1
7806A3A12272702	COMET	4	1	1
7806A3A12238880	CCL19	4	0.618195	1
7806A3A12240439	HAT1	4	0.0022681	0.0460484
7806A3A12265423	GAPDH	4	0.988	1
7806A3A12238238	PAK1	4	0.261477	0.8595188
7806A3A12237016	TLC	4	0.817049	1
7806A3A12276070	IGHV	4	0.619467	1
7806A3A12234344	BK1 receptor	4	0.0267349	0.2187644
7806A3A12245932	TREM-1	4	0.527252	1
7806A3A12239000	SLC2A1	4	0.999971	1
7806A3A12250978	CGAS	4	0.196464	0.7505098
7806A3A12249115	LNP	4	0.000427591	0.01049569
7806A3A12236586	IRF8	4	0.216623	0.7966251
7806A3A12236785	IRR	4	0.12172	0.5818687
7806A3A12254786	APACHE	4	0.32824	0.9482793
7806A3A12245663	SIRT6	4	0.296951	0.9133006
7806A3A12238010	Clove	4	1	1
8164A3A13874796	Mas	4	0.278354	0.8895505
7806A3A12237441	MUC4	4	0.6646	1
7806A3A12234311	Bcl2	4	1	1
7806A3A12253493	PIKfyve	4	0.0241606	0.19957
7806A3A12241761	TRIM28	4	0.0621212	0.3739156
8164A3A13871898	bat	4	0.0222136	0.1875153
7806A3A12239545	TNFAIP3	4	0.481774	1
7806A3A12243669	BTKi	4	0.00196494	0.04121611
7806A3A12238953	sex hormone-binding globulin	4	1	1
7806A3A12234631	CD63	4	0.99345	1
7806A3A12244197	IL-37	4	0.900175	1
7806A3A12237440	MUC5AC	4	0.999776	1
8088A3A13517260	ACE2	4	1.19248e-08	1.049713e-06
7806A3A12286823	COX2	4	0.940244	1
7806A3A12245170	mink	4	0.0804795	0.4469213
7806A3A12239075	RDT	4	0.914862	1
8164A3A13873708	Th2-type	4	0.989443	1
7806A3A12234741	ChAd	4	0.00102898	0.0234296
7806A3A12264194	ab6	4	0.00102898	0.0234296
7806A3A12236614	IFI27	4	0.0125642	0.1313737
7806A3A12240447	IP-1	4	0.50107	1
7806A3A12239874	STD	4	0.971379	1
8164A3A13873812	HIF1a	4	1	1
7806A3A12242305	CCR9	4	0.0638466	0.3829689
8164A3A13884266	microtubule associated protein	4	0.947769	1
7806A3A12234737	CD66b	4	0.23135	0.8198126
7806A3A12241968	beta2	4	0.999575	1
7806A3A12234104	AIRE	4	0.696231	1
8164A3A13873848	HMOX1	4	0.999996	1
7806A3A12247136	resistin	4	0.999992	1
8164A3A13880582	IRF3	4	0.95463	1
7806A3A12236798	IRF5	4	0.309432	0.9231193
7806A3A12236806	ITGA5	4	0.819243	1
8164A3A13899780	TMPRSS4	4	0.00049704	0.01186383
7806A3A12240122	Igs	4	0.594858	1
7806A3A12245180	NOX4	4	0.908994	1
7806A3A12235864	fucosyltransferase 2	3	0.443672	1
7806A3A12239732	UCP2	3	0.892105	1
7806A3A12236151	G protein-coupled receptor 30	3	0.810301	1
7806A3A12239485	thrombopoietin	3	0.999993	1
7806A3A12242957	PAM	3	0.367469	1
7806A3A12242446	IFI44L	3	0.0388638	0.2813967
8164A3A13873173	FcRN	3	0.60137	1
7806A3A12237216	Midkine	3	0.746636	1
7869A3A12519469	TMPRSS2	3	6.75128e-06	0.000236022
7806A3A12235372	eEF1A	3	0.31623	0.9306735
7806A3A12243333	Tap	3	0.937027	1
7806A3A12235597	FcalphaRI	3	0.359904	0.9985468
7806A3A12237855	PCNA	3	1	1
7806A3A12249039	TNKS2	3	0.0987303	0.5067228
7806A3A12234219	ATIII	3	0.841882	1
7806A3A12237073	LOX	3	0.97493	1
7806A3A12245042	amid a	3	0.0592835	0.369381
7685A3A11918981	transmembrane serine protease 2	3	6.75128e-06	0.000236022
7806A3A12243495	pannexin-1	3	0.125361	0.5911096
7806A3A12238864	MCP-4	3	0.297237	0.9133006
7806A3A12256476	CT2	3	0.0228223	0.1912542
8164A3A13871648	angiotensinogen	3	0.951943	1
8157A3A13976035	Furin	3	0.397543	1
7806A3A12239005	SGLT2	3	0.711285	1
7806A3A12242132	granulysin	3	0.510863	1
7806A3A12237782	oncostatin M	3	0.928593	1
8164A3A13886060	Gasdermin D	3	0.702796	1
7806A3A12245936	triggering receptor expressed on myeloid cells 2	3	0.736746	1
7806A3A12240757	EIF2	3	0.308628	0.9231193
7806A3A12256590	Ag2	3	0.0108475	0.1158741
7806A3A12254239	NPC1	3	0.630886	1
7806A3A12272672	APOBEC3A	3	0.15589	0.666093
8164A3A13875304	NRP1	3	0.92895	1
7806A3A12234778	nAChR	3	0.906271	1
8157A3A13976134	ADAM17	3	0.107333	0.5368201
7806A3A12242110	ribonuclease P/MRP subunit p30	3	0.00366587	0.067848
7806A3A12236264	beta-glucuronidase	3	0.999999	1
7806A3A12235091	CYP1A2	3	1	1
7806A3A12240704	NRP2	3	0.346635	0.97935
7806A3A12261883	PspA	3	0.923428	1
7806A3A12236106	IgG/IgM	3	0.958205	1
7806A3A12243235	dicer endoribonuclease	3	0.999257	1
7806A3A12234323	Bcl-6	3	0.999819	1
7806A3A12242019	TGF-beta activated kinase 1 (MAP3K7) binding protein 1	3	0.00685996	0.0764215
7806A3A12240552	OASL	3	0.0235171	0.1961269
7806A3A12242174	TXNIP	3	0.692861	1
7806A3A12236391	HLA-G	3	0.987752	1
7806A3A12240235	FAM	3	0.388182	1
7806A3A12244292	TMEM97	3	0.0416542	0.2900708
7806A3A12241748	visfatin	3	0.998311	1
7806A3A12236941	NKG2C	3	0.11174	0.5517893
7806A3A12243435	BL2	3	0.717234	1
7806A3A12251007	TNFRSF13C	3	0.495325	1
7806A3A12235658	VEGFD	3	0.885151	1
7806A3A12245389	IRAK4	3	0.268892	0.8738359
7806A3A12251221	CYP2R1	3	0.20261	0.7663751
7806A3A12244121	P75	3	0.955292	1
7806A3A12250439	DPP9	3	0.104434	0.5268893
7806A3A12240849	NBN	3	0.242735	0.8327751
7806A3A12242529	fan	3	0.0650349	0.3867453
7806A3A12238989	SKP2	3	0.894677	1
7806A3A12238132	AutoPulse___	3	0.893655	1
7806A3A12243649	Vir	3	0.0760015	0.4319231
7784A3A12475653	ACE2	3	1.87059e-05	0.0006285546
7806A3A12237700	Tyrosine Kinase Receptor	3	1	1
7806A3A12236307	hyaluronan synthase 1	3	0.0104002	0.111786
7806A3A12235589	FASN	3	0.99948	1
7806A3A12252340	PAR-1	3	0.900143	1
7806A3A12249480	gene induced hypoxia	3	0.150924	0.6545714
7806A3A12241399	DDB1- and CUL4-associated factor 1	3	0.00279214	0.05522055
7806A3A12245482	CLEC1B	3	0.0760015	0.4319231
7806A3A12234999	CSF1R	3	0.998506	1
7806A3A12244555	TRBV11-2	3	1.36453e-06	5.306335e-05
7806A3A12236373	DQB1	3	0.994791	1
7806A3A12237392	MTHFR	3	1	1
7806A3A12246883	ALC	3	0.0148239	0.1397971
7806A3A12236848	Janus Kinase-3	3	0.892624	1
7806A3A12249275	SPP1	3	0.781329	1
7806A3A12247812	APOBEC3G	3	0.745552	1
7806A3A12236211	GSK3A	3	0.164277	0.6900033
7806A3A12237271	macrophage migration inhibitory factor	3	0.999275	1
7806A3A12242786	AP2-associated protein kinase 1	3	0.000117818	0.003342361
7806A3A12239799	TRPV1	3	0.981449	1
7806A3A12235657	FGF2	3	0.928593	1
7806A3A12237304	MMP2	3	1	1
8164A3A13895421	LNP	3	0.0159299	0.1486075
8164A3A13899804	CGAS	3	0.380667	1
7806A3A12250302	RHOT2	3	0.000414994	0.01025924
7806A3A12241092	KLOTHO	3	0.991552	1
7806A3A12238872	CCL17	3	0.954358	1
7806A3A12233872	ABL1	3	1	1
7806A3A12248979	RCP	3	0.0108475	0.1158741
7806A3A12238255	PRKDC	3	0.942225	1
8164A3A13884627	Pycard	3	0.98815	1
7806A3A12238974	gp100	3	0.999976	1
7806A3A12235495	ERCC1	3	0.977232	1
8164A3A13875089	Mx1	3	0.434549	1
7806A3A12238111	cDC2	3	0.995296	1
7806A3A12239184	Srebp1	3	0.91377	1
7806A3A12237591	NFATC1	3	0.821918	1
8157A3A13992194	Ang	3	0.999999	1
7806A3A12236212	GSK3B	3	0.999913	1
7806A3A12235697	vascular endothelial growth factor receptor 1	3	0.999995	1
7806A3A12237314	RASI	3	0.074745	0.426182
7806A3A12240476	ficolin-3	3	0.100144	0.5067228
7806A3A12235176	C/EBP homologous protein	3	1	1
7806A3A12239550	cmH2	3	0.887872	1
7806A3A12239455	thyroglobulin	3	1	1
7806A3A12234693	CDKN1C	3	0.607396	1
7806A3A12234750	CDR	3	0.54774	1
7806A3A12235553	Proteinase-activated receptor 1	3	0.824327	1
7806A3A12258259	miR-17	3	0.904423	1
7806A3A12238484	RAD17	3	0.0581633	0.3653415
7806A3A12234988	CCP	3	0.829839	1
7806A3A12250437	OASIS	3	0.255768	0.8511664
7806A3A12249840	SLX4	3	0.0164997	0.1526884
7806A3A12259381	miR-451a	3	0.244591	0.8327751
7806A3A12234081	annexin A1	3	0.966088	1
7806A3A12264436	CD24Fc	3	0.98815	1
7806A3A12234761	Checkpoint kinase 1	3	0.997361	1
7806A3A12245084	Il19	3	0.19904	0.7586756
7806A3A12239226	HAI	3	0.61632	1
7806A3A12237468	GADD45B	3	0.142763	0.6318684
7806A3A12234460	CAIX	3	0.999441	1
7806A3A12240949	M-protein	3	0.928235	1
7806A3A12253752	ncRNA	3	0.665595	1
7806A3A12238151	cathepsin A	3	0.291551	0.9041738
7806A3A12235950	GATA3	3	0.997819	1
7806A3A12236620	IFIT2	3	0.0445427	0.3089425
8164A3A13872550	cathepsin B	3	0.988599	1
7806A3A12239117	homodimer	3	1	1
7806A3A12240904	warts	3	0.989331	1
7806A3A12234226	ATF3	3	0.820296	1
8164A3A13881501	NAMPT	3	0.769558	1
7806A3A12237687	NRAS	3	1	1
7806A3A12237248	MFGE8	3	0.443672	1
7806A3A12235345	E2F1	3	0.999838	1
7806A3A12242576	by 55	3	0.344737	0.9747833
7806A3A12235978	myostatin	3	0.970279	1
7806A3A12236161	GPX1	3	0.947561	1
7806A3A12237057	lamin A/C	3	0.998961	1
7806A3A12234107	BIRC3	3	0.799839	1
7806A3A12249672	P-100	3	0.96555	1
7806A3A12235631	fibroblast growth factor 2	3	1	1
7806A3A12235634	FPs	3	0.190185	0.7354528
7806A3A12244136	LAMP-3	3	0.0987303	0.5067228
7806A3A12234718	carboxylesterase 1	3	0.527826	1
7806A3A12235629	Feb 1	3	0.00390746	0.07155407
7806A3A12238937	SP-B	3	0.881809	1
7806A3A12248170	CDCP1	3	0.0516571	0.3386084
7806A3A12237706	nts	3	0.994671	1
7806A3A12234299	Azurocidin	3	0.514282	1
7806A3A12241771	WAVE II	3	0.147642	0.6486418
7806A3A12257244	VLP	3	0.231654	0.8198126
7806A3A12238888	CD362	3	0.359904	0.9985468
7806A3A12240214	TAM	3	0.85454	1
7806A3A12247095	CCL28	3	0.546099	1
7806A3A12234241	ATP1A1	3	0.412436	1
7806A3A12240357	ULK1	3	0.557509	1
7806A3A12235281	beta-lactamase	3	1	1
7806A3A12236179	Progranulin	3	0.982992	1
7806A3A12256583	Arms 2	3	0.33904	0.9656702
7806A3A12239540	claudin-5	3	0.863763	1
7806A3A12239665	TTF1	3	0.943676	1
7806A3A12258476	TMEM41B	3	0.000117818	0.003342361
7806A3A12244977	HIF-1	3	0.996297	1
7806A3A12247141	IFN-kappa	3	0.00685996	0.0764215
7806A3A12247144	zinc finger antiviral protein	3	0.0361722	0.2635621
7806A3A12235071	CatK	3	0.986329	1
7806A3A12235987	GFAP	3	0.999995	1
7806A3A12238023	PC1	3	0.764502	1
7806A3A12236612	IFI16	3	0.164277	0.6900033
7806A3A12235626	FEN1	3	0.567151	1
7806A3A12234207	ASS	3	0.270774	0.8741396
7806A3A12247849	GRY	3	0.000305533	0.007832961
7806A3A12247285	Feb 11	3	0.00468921	0.0764215
7806A3A12238879	CCL23	3	0.0698132	0.4060899
7806A3A12246586	renalase	3	0.120756	0.5780588
7806A3A12240993	IL32	3	0.64924	1
7806A3A12253067	TnT	3	0.181433	0.7226002
7806A3A12238820	SARS1	3	3.42929e-07	1.483597e-05
7806A3A12236318	heparin cofactor II	3	0.657488	1
7806A3A12233981	AMPs	3	0.365579	1
7806A3A12242655	IRAK3	3	0.0837332	0.460001
8157A3A13974259	AT2	3	0.982428	1
7806A3A12234701	CEBP	3	0.986403	1
8164A3A13876549	CXCL5	3	0.683964	1
7806A3A12245140	Syncytin	3	0.33714	0.9651295
7806A3A12235130	CYP27B1	3	0.892105	1
7806A3A12240627	RIPK1	3	0.502262	1
7806A3A12236639	interferon-gamma receptor 2	3	0.141149	0.6318684
7806A3A12242448	2003-03-14	3	0.992055	1
7806A3A12239361	ZEB1	3	0.999103	1
7806A3A12237261	stem cell factor	3	1	1
7806A3A12234645	CD74	3	0.557509	1
7806A3A12234925	COX10	3	0.00794421	0.0863487
7806A3A12237668	Npm1	3	0.999875	1
8164A3A13891922	IL-23	3	0.999983	1
7806A3A12252054	ACTT-1	3	1.87059e-05	0.0006285546
7806A3A12237895	Platelet-derived growth factor receptor-beta	3	0.999702	1
7806A3A12241528	Tom70	3	0.00299693	0.05860099
7806A3A12236935	KLKB1	3	0.949409	1
7806A3A12239065	OCT1	3	0.844775	1
7806A3A12234836	C-C chemokine receptor type 5	3	0.371245	1
7806A3A12248160	Minerva	3	0.130028	0.6114496
7806A3A12240578	Beclin1	3	0.999999	1
7806A3A12238801	S100A6	3	0.949926	1
7806A3A12236740	IL10RB	3	0.141149	0.6318684
7806A3A12235496	ERBB2	3	1	1
7806A3A12254914	COX18	3	7.19599e-05	0.00212866
7806A3A12234518	calpain inhibitor	3	0.740076	1
7806A3A12237660	CADASIL	3	0.99681	1
7806A3A12240777	Timeless	3	0.28209	0.8924255
7806A3A12253015	smile	3	0.963884	1
7806A3A12234395	BST2	3	0.445489	1
7806A3A12242348	ILC	3	0.408723	1
7806A3A12240258	EPO	3	0.999927	1
7806A3A12240147	ANC	3	0.190185	0.7354528
8164A3A13871899	protein fused	3	0.676186	1
7806A3A12234112	apolipoprotein B	3	1	1
7806A3A12249884	CNI	3	0.55589	1
7806A3A12234722	Cathepsin C	3	0.657488	1
7806A3A12247629	CWC22	3	0.00496937	0.0764215
7806A3A12247124	vRNA	3	0.0662149	0.3930871
7806A3A12234405	C1QBP	3	0.050609	0.3336338
7806A3A12239064	OATP1A2	2	0.733093	1
8164A3A13881571	PD-L1	2	1	1
5997A3A8463433	melittin	2	0.921389	1
7806A3A12234914	COX4I1	2	0.0644978	0.3842115
7806A3A12248026	PALS1	2	0.0153119	0.1440068
7806A3A12258124	APOBEC4	2	0.00100512	0.02319147
7806A3A12238043	urokinase-type plasminogen activator	2	0.999995	1
7806A3A12237828	PAPRs	2	0.855894	1
7806A3A12238551	RELA	2	0.979633	1
7806A3A12245461	MZB1	2	0.323779	0.9415135
7806A3A12261723	CDK11A	2	0.993264	1
7806A3A12234051	A1M	2	0.48794	1
7909A3A13133881	TMPRSS2	2	0.000146296	0.003932259
8164A3A13874116	IL17	2	1	1
7806A3A12236549	HTL	2	0.078346	0.4430646
7806A3A12247593	Astra	2	0.192741	0.7436751
8164A3A13871580	ADAM17	2	0.915388	1
7806A3A12249486	rhino	2	0.0845403	0.4636989
7806A3A12234397	BST-1	2	0.14092	0.6318684
7806A3A12246887	PAG	2	0.316107	0.9306735
8164A3A13896243	BCR	2	0.985638	1
7806A3A12252282	BEST3	2	0.00212392	0.04401729
7806A3A12242717	ECD	2	0.595457	1
7806A3A12237651	nos	2	0.999996	1
7806A3A12240051	USP7	2	0.354215	0.9926624
8157A3A13974448	interleukin 1 beta	2	1	1
8164A3A13909272	PARP14	2	0.0112424	0.1197229
7806A3A12241338	mDC1	2	0.364255	1
7806A3A12236565	Serotonin 2A Receptor	2	0.999956	1
7806A3A12234597	antigen CD20	2	0.946447	1
7806A3A12246645	Cat L	2	0.59735	1
7806A3A12243227	SIRT3	2	0.95448	1
7806A3A12246123	PC4	2	0.292984	0.9069925
7995A3A13566997	TMPRSS2	2	0.000291228	0.007521941
7806A3A12241994	Rap guanine nucleotide exchange factor 3	2	0.119776	0.5741617
8164A3A13884149	IFITM3	2	0.162776	0.6853622
7806A3A12235304	desmoglein 1	2	0.973515	1
7806A3A12240171	HMGA2	2	0.964819	1
7806A3A12236980	K31	2	0.806454	1
7806A3A12236009	inf	2	0.990208	1
7806A3A12233979	ADRB2	2	0.99987	1
7806A3A12238302	serine protease 2	2	0.233615	0.8198126
7806A3A12235172	dopa decarboxylase	2	0.912475	1
7806A3A12236217	gelsolin	2	0.981828	1
7806A3A12236316	HbA1	2	0.999996	1
7806A3A12241098	NHERF1	2	0.243925	0.8327751
7806A3A12241621	RBX1	2	0.138532	0.6259259
7806A3A12250892	rs8177374	2	0.69434	1
7806A3A12234001	Iba-1	2	0.993428	1
7806A3A12238378	COX-1	2	1	1
7806A3A12252170	Srxn1	2	0.0644978	0.3842115
7806A3A12251081	MRGD	2	0.00363044	0.067848
7806A3A12239515	TLR5	2	0.975633	1
7806A3A12250871	SPC	2	0.589739	1
7806A3A12240965	AT-1	2	0.131424	0.6121917
8893A3A14203282	ORF1ab	2	0.000146296	0.003932259
7806A3A12251785	CD200R	2	0.478954	1
7806A3A12238626	ribonuclease inhibitor	2	0.451423	1
7806A3A12240279	Eomes	2	0.642506	1
7806A3A12234611	Siglec-3	2	0.999909	1
8164A3A13878268	MHV-1	2	0.722069	1
7806A3A12248281	collectin 11	2	0.175164	0.7123885
7806A3A12240534	PAC-1	2	0.887442	1
7806A3A12241588	TAR	2	0.858997	1
8164A3A13881337	Tbx21	2	0.522893	1
8918A3A14203270	spike glycoprotein	2	0.00421588	0.07560187
7806A3A12240388	CUL3	2	0.39889	1
7806A3A12238217	PFP	2	0.599236	1
8164A3A13879308	Apelin	2	0.767579	1
7806A3A12239832	Wnt5a	2	0.990901	1
7806A3A12235622	FCN1	2	0.287829	0.9015169
7806A3A12243419	PLD3	2	0.0551774	0.3484835
7806A3A12234100	APBB1	2	0.108406	0.5414043
7806A3A12252366	bean	2	0.867941	1
7806A3A12237599	nuclear factor of activated T cells, cytoplasmic 3	2	0.172674	0.7042422
7806A3A12236171	GPX4	2	0.929442	1
8164A3A13877747	OX40	2	0.897023	1
7806A3A12235982	GDI2	2	0.0413857	0.2887821
8164A3A13872282	choline acetyltransferase	2	0.996351	1
8157A3A13979398	NLRP3	2	0.990148	1
7806A3A12239666	tTPA	2	0.22847	0.8149302
7806A3A12235138	CD55	2	0.992241	1
7806A3A12244234	TNFRSF21	2	0.32888	0.9492145
7806A3A12235109	CYP2B6	2	0.999976	1
8164A3A13884892	EIF2	2	0.19527	0.74862
7806A3A12235049	connective tissue growth factor	2	0.999999	1
7806A3A12250241	thymic stromal lymphopoietin	2	0.997841	1
7806A3A12234246	proton pump	2	0.973828	1
7806A3A12236506	histidine-rich glycoprotein	2	0.580074	1
7806A3A12237194	MCC	2	0.218203	0.7966251
7806A3A12259938	KRT	2	0.00621353	0.0764215
7806A3A12238317	SAP	2	0.948274	1
7806A3A12263282	SOD2	2	0.98887	1
7806A3A12242086	cPLA2	2	0.69434	1
7806A3A12239450	TFF2	2	0.535579	1
7806A3A12243014	MAST2	2	0.0122079	0.128035
7806A3A12237309	MMP8	2	0.999635	1
7806A3A12236815	ITGAV	2	0.882996	1
7806A3A12234366	CXCR5	2	0.86938	1
7806A3A12246364	PAR2	2	0.490172	1
7806A3A12236653	IGF2R	2	0.899857	1
7806A3A12237388	cytochrome b	2	0.993508	1
8164A3A13900350	Rap guanine nucleotide exchange factor 3	2	0.570243	1
7806A3A12239818	WASP	2	0.996441	1
7806A3A12239563	Cellular tumor antigen p53	2	1	1
7806A3A12292767	AAK1	2	0.00941831	0.1015476
7806A3A12270901	miR-2392	2	0.00170707	0.03624644
8164A3A13881174	PF4	2	0.782754	1
7806A3A12241414	TOX	2	0.369252	1
8157A3A13974604	MCP1	2	0.999786	1
7806A3A12240933	NEU	2	0.882348	1
7806A3A12235475	Ephx2	2	0.47215	1
7806A3A12238903	K-12	2	0.939552	1
8164A3A13877755	ISA	2	0.898165	1
7806A3A12241887	ILT4	2	0.401331	1
7806A3A12248592	PAD	2	0.973515	1
8157A3A13985423	Nos2	2	0.86428	1
7806A3A12236637	IFNGR	2	0.792743	1
7806A3A12242118	LCB1	2	0.124404	0.5899187
7806A3A12234588	CD5	2	0.999999	1
7806A3A12234704	CDR2	2	0.678846	1
7806A3A12240707	flame	2	0.999888	1
8164A3A13878338	MHC-iota	2	0.18016	0.7183569
7806A3A12239728	uCn	2	0.619543	1
8164A3A13881181	DHODH	2	0.2259	0.8149302
8164A3A13876553	eotaxin	2	0.997868	1
8164A3A13878540	NSP3	2	0.106168	0.532433
7806A3A12238361	TAS2R38	2	0.321224	0.9366102
7806A3A12239386	Tc2	2	0.894702	1
7806A3A12234505	LL37	2	0.772344	1
7806A3A12236541	Hsp90alpha	2	0.512144	1
7806A3A12235106	CYP2C9	2	1	1
8164A3A13873721	hyaluronan synthase 1	2	0.112919	0.5519953
7806A3A12244231	alpha 2	2	0.999998	1
7806A3A12256428	IL-31	2	0.775861	1
8164A3A13901894	PDE4D	2	0.218203	0.7966251
7806A3A12257676	CK20	2	0.997716	1
7806A3A12235094	CYP1A1	2	1	1
7806A3A12236092	GnRH-II	2	0.267172	0.8690623
7806A3A12239856	XIST	2	0.968174	1
7806A3A12235521	ESR2	2	1	1
8157A3A13975899	bat	2	0.162776	0.6853622
7806A3A12234678	CDK2	2	1	1
7806A3A12250790	PRRT2	2	0.476692	1
7806A3A12243551	TXN	2	0.336513	0.964132
7806A3A12283230	CREST-2	2	0.0069579	0.0764215
8164A3A13887727	Ang	2	0.999672	1
7806A3A12234504	CANX	2	0.804398	1
7806A3A12258187	miR-122	2	0.988027	1
8074A3A13749651	furin	2	0.000146296	0.003932259
7806A3A12247158	Tc1	2	0.689758	1
7806A3A12255840	Sept 14	2	0.0291563	0.2288208
8164A3A13872507	colony-stimulating factor 1 receptor	2	0.996305	1
7806A3A12239363	HNF1B	2	0.978376	1
7806A3A12234338	BCP	2	0.298135	0.9133006
7806A3A12236350	Hexokinase	2	0.99806	1
7806A3A12242386	PAR	2	0.805428	1
7806A3A12248036	DCLRE1C	2	0.768778	1
7806A3A12235453	neuron-specific enolase	2	1	1
7806A3A12252136	MacroD2	2	0.0533753	0.3470145
7806A3A12241170	home 2	2	0.351696	0.9902274
7806A3A12237394	MTHFD1	2	0.213084	0.7895971
7806A3A12237615	NGF	2	0.99806	1
7806A3A12237259	MGMT	2	0.999988	1
7806A3A12234197	CLEC4H1	2	0.110656	0.5502592
7806A3A12240049	MAPK3	2	0.386616	1
7806A3A12235133	lanosterol 14alpha-demethylase	2	0.7615	1
7806A3A12234521	caspase 4	2	0.69434	1
7806A3A12235696	FOXO3	2	0.99913	1
7806A3A12255901	RBM	2	0.0498359	0.3291642
7806A3A12258255	MiR-15b	2	0.434984	1
7806A3A12235103	CYP2C8	2	0.987354	1
7806A3A12241912	IK1	2	0.986482	1
7806A3A12235705	Flt-3	2	0.999999	1
7806A3A12240670	TRAIL R1	2	0.999979	1
8157A3A13974857	Mas	2	0.837686	1
7806A3A12238793	NT3	2	0.748929	1
7806A3A12242884	GMP	2	0.891128	1
7806A3A12236817	LFA-1	2	0.999152	1
8164A3A13874891	Cxcl9	2	0.991597	1
7806A3A12242176	periostin	2	0.998814	1
7806A3A12246517	MATE1	2	0.490172	1
7806A3A12239063	OCT2	2	0.922716	1
7806A3A12236022	alpha-galactosidase A	2	0.999719	1
7806A3A12240090	TFEB	2	0.787245	1
7806A3A12242269	KDM5B	2	0.246506	0.8364287
7806A3A12236591	CD50	2	0.742431	1
7806A3A12238131	PON2	2	0.520756	1
7806A3A12238668	RORC	2	0.881041	1
7806A3A12242793	NAC	2	0.99496	1
7806A3A12233931	ADRP	2	0.767579	1
8053A3A13480449	ACE2	2	0.00308623	0.05934134
7806A3A12243224	SIRT5	2	0.267172	0.8690623
7806A3A12241168	NCR2	2	0.633806	1
7806A3A12234911	BP180	2	0.904776	1
5019A3A7064487	Mod-5	2	0.00212392	0.04401729
7806A3A12244846	A2a	2	0.950619	1
7806A3A12238152	PPIB	2	0.359242	0.9985468
7806A3A12235498	PARs	2	0.912475	1
7806A3A12240196	CDR3	2	0.988526	1
7806A3A12234036	ALOX5AP	2	0.157866	0.6728747
7806A3A12236330	HDAC2	2	0.984275	1
7806A3A12236046	GLP-1R	2	0.997538	1
7806A3A12248005	FBS	2	0.888065	1
7806A3A12262599	GLP-1	2	0.999975	1
7806A3A12236775	Ship	2	0.47215	1
7806A3A12245508	spurt	2	0.681996	1
7806A3A12247407	PC3	2	0.401331	1
7806A3A12239350	SII	2	0.262003	0.8595188
7806A3A12236656	insulin-like growth factor 1 receptor	2	1	1
7806A3A12240683	interleukin-18 receptor alpha	2	0.305848	0.9200757
7806A3A12247541	Slack	2	0.38908	1
7806A3A12240773	uridylate-specific endoribonuclease	2	0.0175487	0.161532
7806A3A12237438	MUC2	2	0.998806	1
7806A3A12261610	neutrophil defensin 1	2	0.98047	1
7806A3A12238250	PRKCA	2	0.999948	1
7806A3A12239461	HITF	2	0.900415	1
7806A3A12244807	A10	2	0.791653	1
7806A3A12241405	HDAC9	2	0.998268	1
7806A3A12261569	CARMEN	2	0.0199149	0.1768859
7806A3A12241188	napsin A	2	0.73579	1
7806A3A12236219	GSTM1	2	0.999999	1
8164A3A13873654	granzyme B	2	0.999799	1
7806A3A12242213	DNAX accessory molecule-1	2	0.789459	1
7806A3A12246945	PRF1	2	0.593558	1
7680A3A11880891	ACE2	2	4.89941e-05	0.001487444
7806A3A12240608	S1P	2	0.439708	1
7806A3A12235635	acidic fibroblast growth factor	2	0.99872	1
7806A3A12237228	Pyrin	2	0.993971	1
7806A3A12235607	FCER2	2	0.999863	1
7806A3A12239692	Tyro3	2	0.556201	1
7806A3A12244925	PCA	2	0.83237	1
7806A3A12247276	CBP	2	0.800229	1
7806A3A12240360	EEA1	2	0.233615	0.8198126
7806A3A12245188	IL-21 receptor	2	0.47215	1
8157A3A13978660	CYP2D6	2	0.821264	1
7806A3A12236997	LAIR-1	2	0.17019	0.7012233
7806A3A12234380	BP230	2	0.996858	1
8164A3A13877633	cTnI	2	0.879056	1
7806A3A12236498	Histamine H1 Receptor	2	0.93336	1
8164A3A13876926	signal transducer and activator of transcription 1	2	1	1
7806A3A12236822	CD11c	2	0.999317	1
8164A3A13875451	NEU1	2	0.233615	0.8198126
8164A3A13871557	ACE	2	0.621349	1
7806A3A12239570	Triosephosphate Isomerase	2	0.937432	1
8164A3A13871569	alpha-SMA	2	0.999994	1
7806A3A12242361	ILT2	2	0.866488	1
7806A3A12240801	protein 3	2	0.999998	1
7806A3A12240564	EIF3	2	0.703336	1
7806A3A12237336	CD206	2	0.994539	1
8164A3A13903980	LCB1	2	0.0335452	0.25306
7806A3A12239299	SPR	2	0.967796	1
7806A3A12245565	CHST15	2	0.0263692	0.2167786
7806A3A12235428	Hua	2	0.862789	1
7806A3A12234522	CASP8	2	0.998955	1
7806A3A12248491	PA-1	2	0.460693	1
7806A3A12266265	Feb 10	2	0.0236975	0.1966836
8164A3A13871650	AKT1	2	1	1
7806A3A12241251	GB-2	2	0.303279	0.9191319
8157A3A13978926	ALP	2	0.999934	1
7806A3A12259210	BDNF	2	0.999999	1
7806A3A12239686	OX40 ligand	2	0.782754	1
7806A3A12241645	Bim	2	0.999965	1
7806A3A12247963	ERAP2	2	0.17019	0.7012233
8164A3A13898823	toll-like receptor 7	2	0.999277	1
7806A3A12237904	Autotaxin	2	0.81935	1
7806A3A12236267	GZMH	2	0.0588447	0.368952
7806A3A12240727	pregnane X receptor	2	0.999977	1
7806A3A12236871	ERG	2	0.999998	1
7806A3A12252492	TRIF	2	0.535579	1
8164A3A13916974	histone H4	2	0.825037	1
7806A3A12237387	COI	2	0.993011	1
7806A3A12237911	betaX	2	0.865755	1
8164A3A13885848	mul	2	0.940243	1
7806A3A12237339	MS1	2	0.095176	0.5013762
7806A3A12241366	EDEM1	2	0.0250187	0.206166
7806A3A12249461	OSM	2	0.657752	1
7806A3A12238466	RAB5A	2	0.659413	1
8164A3A13902336	PARP12	2	0.00170707	0.03624644
7806A3A12238664	RORA	2	0.903162	1
7806A3A12252418	REN	2	0.223332	0.8072042
7806A3A12235023	versican	2	0.979996	1
7806A3A12245548	Pokemon	2	0.282669	0.8934406
7806A3A12244120	NOX-1	2	0.851122	1
7806A3A12245450	GPVI	2	0.8095	1
7806A3A12264727	Feb 9	2	0.00484194	0.0764215
8164A3A13916158	ISG15	2	0.514307	1
7806A3A12243635	SAMHD1	2	0.483459	1
7806A3A12233937	adenosine kinase	2	0.714985	1
7806A3A12235081	CX3CR1	2	0.971895	1
7806A3A12255589	CPP	2	0.439708	1
7806A3A12247088	METTL3	2	0.897023	1
7806A3A12236651	IGFBP1	2	0.999982	1
7806A3A12243414	SLC7A11	2	0.748929	1
7806A3A12236371	HLA-DP	2	0.979755	1
7806A3A12235564	Coagulation Factor V	2	0.8495	1
7806A3A12236072	GNAS	2	0.994992	1
7806A3A12242171	NS1	2	0.998791	1
7806A3A12234332	BCMA	2	0.485703	1
7806A3A12250966	atrogin-1	2	0.734444	1
7806A3A12239693	Cat B	2	0.995234	1
7806A3A12234642	CDK1	2	0.99997	1
7806A3A12237364	MRP1	2	0.997312	1
7806A3A12243513	dusty	2	0.0515946	0.3386084
7806A3A12262615	hsa-miR-298	2	0.00258385	0.05169194
7806A3A12242113	CXCL-13	2	0.992145	1
8164A3A13874752	Smad3	2	0.999995	1
7806A3A12243070	phosphatidylserine receptor	2	0.175164	0.7123885
7806A3A12240630	TNFSF13	2	0.774694	1
8164A3A13878250	Exo	2	0.136153	0.6212812
7806A3A12239736	CC16	2	0.801279	1
7806A3A12253181	LFT	2	0.0973472	0.5067228
7806A3A12240831	Cholesterol 25-Hydroxylase	2	0.101731	0.5140014
7806A3A12234907	MAP3K8	2	0.231042	0.8198126
7995A3A13565856	furin	2	0.0381733	0.2775584
7806A3A12241641	GPI	2	0.899296	1
7806A3A12244770	IGLV3-19	2	0.000483118	0.01168804
7806A3A12233834	ABCA3	2	0.415875	1
8164A3A13898990	KIM-1	2	0.879056	1
7806A3A12235267	DNMT1	2	0.999989	1
7806A3A12235272	DNMT3A	2	0.999815	1
7806A3A12241126	SELENOF	2	0.0515946	0.3386084
7806A3A12241291	cart	2	0.42308	1
7806A3A12236836	IVD	2	0.25167	0.8473053
7806A3A12234316	CCND1	2	0.99998	1
7806A3A12235416	eIF4A	2	0.331427	0.952715
7806A3A12236585	ICAM2	2	0.593558	1
8164A3A13906323	IgG3	2	0.999899	1
7806A3A12243538	SPDEF	2	0.274922	0.8831915
7806A3A12240189	SLC7A5	2	0.865755	1
7806A3A12238153	PPAR	2	1	1
7806A3A12237966	PHB	2	0.215642	0.7966251
8164A3A13872114	RUNX1	2	0.993054	1
7806A3A12239249	stromal interaction molecule-1	2	0.841145	1
7806A3A12235574	FANCD2	2	0.817417	1
7806A3A12236374	HLA-DQB1	2	0.978633	1
7806A3A12233984	AGER	2	0.593558	1
7806A3A12234345	CFB	2	0.880383	1
7806A3A12242693	SP140	2	0.030592	0.2390043
7806A3A12254254	Asp	2	0.999976	1
7806A3A12234324	BCL3	2	0.415875	1
7806A3A12246677	H41	2	0.00621353	0.0764215
9247A3A14203594	Env	2	1	1
7806A3A12247271	PLP	2	0.7615	1
7806A3A12234424	C4a	2	0.99951	1
7806A3A12237168	monoamine oxidase B	2	0.999704	1
8164A3A13876546	CXCL12	2	1	1
8164A3A13871841	Atf2	2	0.800229	1
5019A3A7067710	ser-4	2	0.0069579	0.0764215
7806A3A12235311	PVA	2	0.977181	1
7806A3A12247936	OAS	2	0.262003	0.8595188
7806A3A12241758	G3BP1	2	0.167712	0.6943197
8164A3A13873901	HPD	2	0.853526	1
7806A3A12237038	galectin-8	2	0.298135	0.9133006
7806A3A12238463	RAB1A	2	0.152985	0.6618514
7806A3A12241846	Gephyrin	2	0.262003	0.8595188
8164A3A13887427	IFIH1	2	0.610412	1
7806A3A12236487	hepsin	2	0.272339	0.8776213
7806A3A12246813	MCAF	2	0.326331	0.9435519
7806A3A12242640	centrosomal protein 250	2	0.0277485	0.2187644
7806A3A12234035	ALOX5	2	0.999978	1
7806A3A12236236	GSTP1	2	0.999986	1
7806A3A12246621	impact protein	2	0.518613	1
7806A3A12240672	TNF receptor superfamily member 10B	2	0.999952	1
7818A3A12309104	TMPRSS2	2	0.00621353	0.0764215
7806A3A12234535	CAV1	2	0.843694	1
8164A3A13874103	IL10	2	1	1
7806A3A12242852	ATF6	2	0.945824	1
7806A3A12237942	PFKFB3	2	0.369252	1
7806A3A12247951	NOD2	2	0.998941	1
7806A3A12248891	HSS	2	0.639046	1
7806A3A12236787	ITGA6	2	0.822214	1
8164A3A13875554	CD31	2	1	1
7806A3A12238909	CD162	2	0.967027	1
7806A3A12245096	PSAT1	2	0.280087	0.8909969
7806A3A12239795	EZR	2	0.981609	1
7806A3A12238109	Sept 4	2	0.17019	0.7012233
7806A3A12243797	PGD	2	0.992145	1
7806A3A12241927	TLR6	2	0.738464	1
7806A3A12253720	TPC2	2	0.0463861	0.3175722
7806A3A12248295	VKORC1	2	0.978505	1
7806A3A12236903	KDR	2	1	1
7806A3A12243710	CASPR2	2	0.773522	1
7806A3A12243088	Po-210	2	0.122085	0.5828085
7806A3A12234534	RUNX1	2	0.999949	1
7806A3A12237164	monoamine oxidase A	2	0.999957	1
7806A3A12237820	PCS	2	0.691291	1
7806A3A12262173	ACOD1	2	0.490172	1
8164A3A13878207	Ccl19	2	0.781618	1
7806A3A12272943	FOXP4-AS1	2	0.00421588	0.07560187
8164A3A13893180	PARP7	2	0.0132083	0.1319171
7806A3A12241032	G protein-coupled receptor 55	2	0.318667	0.9359449
7806A3A12240631	TWEAK	2	0.626727	1
7806A3A12238133	Oct 1	2	0.830563	1
7806A3A12245241	trim	2	0.185178	0.7309379
8157A3A13976982	CXCL1	2	0.976065	1
7806A3A12238286	protein C anticoagulant	2	0.231042	0.8198126
7806A3A12240629	TNFSF14	2	0.262003	0.8595188
7806A3A12252167	alien	2	0.825037	1
7806A3A12242504	RIPK3	2	0.695855	1
7806A3A12283093	igh	2	0.993305	1
7806A3A12252202	SIRPalpha	2	0.874993	1
7806A3A12258321	miR-320a	2	0.442062	1
7806A3A12236739	IL-12beta	2	0.940243	1
8164A3A13890560	calcium binding and coiled-coil domain 2	2	0.292984	0.9069925
7806A3A12237816	Pai	2	0.993138	1
7806A3A12239729	UCHL1	2	0.998473	1
8164A3A13875529	PDE4B	2	0.187694	0.7354528
7806A3A12247803	BACH2	2	0.197804	0.7547956
7806A3A12241215	TRP	2	0.999936	1
7806A3A12256665	macrophage inflammatory protein-1beta	2	0.920942	1
7806A3A12252590	PRNT	2	0.00363044	0.067848
7806A3A12239510	TLR1	2	0.986564	1
7806A3A12244233	C18	2	0.999884	1
8164A3A13878544	SKP2	2	0.817417	1
7806A3A12238389	FAK	2	0.998453	1
7806A3A12250535	TIM-4	2	0.0995322	0.5067228
7806A3A12239146	HYAL1	2	0.35673	0.99727
7806A3A12240223	BAs	2	0.393994	1
7806A3A12237793	P2Y1	2	0.941266	1
7806A3A12237656	Notch4	2	0.677262	1
7806A3A12237044	D factor	2	0.999987	1
8164A3A13881576	IL-21	2	0.997491	1
8164A3A13871941	BDNF	2	1	1
8164A3A13901627	AST	2	0.999229	1
7806A3A12236808	ITGA4	2	0.915865	1
7806A3A12245792	ADA2	2	0.970002	1
7806A3A12235605	FcgammaRIIIa	2	0.900415	1
8164A3A13874120	IRAK1	2	0.719253	1
7806A3A12238129	POU2F2	2	0.287829	0.9015169
7806A3A12238257	protein kinase cGMP-dependent 1	2	0.576162	1
7806A3A12241186	ATG5	2	0.992288	1
7806A3A12243842	splash	2	0.218203	0.7966251
7806A3A12235948	GATA2	2	0.901523	1
8164A3A13913234	PARP10	2	0.00621353	0.0764215
7806A3A12241630	SLC12A6	2	0.0723033	0.4191654
8164A3A13902632	Oas2	2	0.0291563	0.2288208
7685A3A11903032	TLR9	2	0.0132083	0.1319171
7806A3A12236475	SPD	2	0.5078	1
7806A3A12245547	MS4A4A	2	0.0224061	0.1886801
7806A3A12234689	CDKN2A	2	1	1
8164A3A13877800	ULK1	2	0.818386	1
7806A3A12236715	gamma c	2	0.919587	1
7806A3A12245668	SIRT7	2	0.29556	0.9119458
7300A3A11131614	ACE2	2	0.00133393	0.02903605
7806A3A12236655	insulin-like growth factor-binding protein 3	2	1	1
8164A3A13874308	integrin alpha5	2	0.80849	1
7806A3A12241165	NCR1	2	0.879056	1
7806A3A12239602	TRAF6	2	0.943589	1
7806A3A12243695	coaster	2	0.238768	0.8285171
7806A3A12244321	OATP1B3	2	0.881041	1
7806A3A12241700	IL-18BP	2	0.36175	0.9985468
7806A3A12237646	Notch1	2	1	1
7806A3A12256634	IGHV1-2	2	0.00550802	0.0764215
8164A3A13874026	IFNAR1	2	0.70775	1
7806A3A12234581	CD1A	2	0.999926	1
7806A3A12237117	LYN	2	0.959969	1
7806A3A12242668	HPS5	2	0.0122079	0.128035
7806A3A12239740	GCs	2	0.931035	1
7806A3A12237287	motilin	2	0.96624	1
7806A3A12237083	kPa	2	0.995292	1
8164A3A13874921	MMP8	2	0.677262	1
8157A3A13974442	Il6	2	0.999985	1
7806A3A12236010	connexin-43	2	0.996441	1
7806A3A12241275	peroxiredoxin 6	2	0.628507	1
7806A3A12241871	FSTL3	2	0.0763145	0.432991
7806A3A12238300	MASP1	2	0.427857	1
7806A3A12243848	fibroblast growth factor 21	2	0.996165	1
7806A3A12258598	h 37	2	0.030592	0.2390043
7806A3A12238003	PI3K type 3	2	0.371745	1
7806A3A12239593	TRAF3	2	0.516463	1
7806A3A12243757	Kbp	2	0.953678	1
5019A3A7073573	ser-1	2	0.0122079	0.128035
7806A3A12238873	CCL22	2	0.996282	1
7806A3A12246084	TMEM106B	2	0.131424	0.6121917
7806A3A12239962	TRIM25	2	0.157866	0.6728747
5019A3A7072487	ser-7	2	0.00484194	0.0764215
7806A3A12236796	IRF4	2	0.916339	1
7806A3A12243436	chisel	2	0.427857	1
7806A3A12249323	UNC93B	2	0.0625937	0.3761055
8164A3A13873376	gastrin	2	0.965026	1
7806A3A12235114	CYP3A5	2	0.999915	1
7806A3A12236754	4-1BB	2	0.990268	1
7806A3A12242675	CRTH2	2	0.664358	1
7806A3A12249045	PD-L2	2	0.988244	1
7806A3A12234703	CD52	2	0.841999	1
7806A3A12237667	Niemann-Pick C1 protein	2	0.531377	1
7806A3A12235648	ACh	2	1	1
7806A3A12259510	Feb 6	2	0.00421588	0.07560187
7806A3A12249479	PARP9	2	0.425471	1
7784A3A12475604	Furin	2	0.000146296	0.003932259
7806A3A12237672	ANP	2	0.997702	1
7806A3A12242233	beta-4	2	0.615911	1
7806A3A12234858	cannabinoid receptor type 1	2	0.999967	1
7806A3A12240054	RAB7A	2	0.0533753	0.3470145
7806A3A12238122	POMC	2	0.999978	1
7806A3A12236375	HLA-DQA1	2	0.996463	1
8164A3A13876728	SLC7A5	2	0.411046	1
7806A3A12242711	OATP2B1	2	0.615911	1
7806A3A12235062	CTSD	2	0.999998	1
7806A3A12234113	APOBEC1	2	0.14092	0.6318684
7806A3A12242963	CMTr1	2	0.00308623	0.05934134
7806A3A12246356	ATG16L1	2	0.714985	1
8164A3A13903976	Gephyrin	2	0.451423	1
7685A3A11907840	IL-15	2	0.078346	0.4430646
8164A3A13881249	Bromodomain-containing protein 4	2	0.883641	1
7806A3A12239462	TGF-beta2	2	0.999951	1
7806A3A12237035	LEP	2	0.807474	1
7806A3A12241394	Slan	2	0.00308623	0.05934134
7806A3A12246896	CPAP	2	0.300708	0.9133006
7806A3A12245172	Langerin	2	0.678846	1
8157A3A13977721	MIP2	2	0.986234	1
228404A3A28619429	spike glycoprotein	2	0.00170707	0.03624644
7806A3A12238402	pleiotrophin	2	0.727628	1
7806A3A12235643	KGF	2	0.987733	1
7806A3A12236846	JUND	2	0.677262	1
8164A3A13875212	IkappaBalpha	2	1	1
7806A3A12240437	poly(ADP-ribose) glycohydrolase	2	0.131424	0.6121917
7806A3A12237598	NFI	2	0.25167	0.8473053
7806A3A12235863	gastrin	2	1	1
7806A3A12244473	immunoglobulin heavy joining 6	2	0.00941831	0.1015476
8164A3A13875664	PLA2G2D	2	0.110656	0.5502592
7806A3A12237789	HSA	2	0.997312	1
7806A3A12235876	DARC	2	0.755284	1
7806A3A12234834	C-C Chemokine Receptor Type 4	2	0.0930191	0.4951206
7806A3A12239725	SUMO1	2	0.760268	1
7806A3A12262502	Feb 7	2	0.00550802	0.0764215
7806A3A12241727	cyclophilin D	2	0.570243	1
8164A3A13901018	Nsp	2	0.138532	0.6259259
7806A3A12239197	TDF	2	0.999986	1
7806A3A12234094	ANXA7	2	0.143316	0.6318684
2782A3A4136832	COX2	2	4.89941e-05	0.001487444
8164A3A13874909	MMP9	2	1	1
1211222A3A37096598	ORF1ab	2	4.89941e-05	0.001487444
7806A3A12239089	SMA	2	0.999984	1
7806A3A12244439	IGHV3-30	2	0.0122079	0.128035
7806A3A12235980	Atf2	2	0.999947	1
7806A3A12240944	LPC	2	0.5078	1
7806A3A12244411	IGHV3-66	2	0.00133393	0.02903605
7806A3A12235983	STA	2	0.401331	1
7806A3A12234106	XIAP	2	0.999979	1
7806A3A12235497	HER4	2	0.997759	1
7806A3A12241649	HD5	1	0.853044	1
7806A3A12236542	HSP90AB1	1	0.794118	1
7806A3A12234183	STs	1	0.999705	1
8164A3A13889243	MLKL	1	0.950181	1
8164A3A13876321	receptor-interacting serine/threonine protein kinase 1	1	0.996399	1
7806A3A12240890	USP14	1	0.429897	1
7806A3A12261157	ACA18	1	0.0208522	0.1768859
7806A3A12244205	IL36B	1	0.112558	0.5517893
7806A3A12236837	ITPR1	1	0.850964	1
7806A3A12238185	PPP2CB	1	0.172754	0.7042422
7806A3A12243537	SAMM50	1	0.320455	0.9359449
8164A3A13905609	Il19	1	0.531686	1
7806A3A12242029	CLEC10A	1	0.36655	1
7806A3A12237826	prostate apoptosis response-4 protein	1	0.190004	0.7354528
8164A3A13872014	C1q	1	0.997465	1
7869A3A12511589	NOS2	1	0.131063	0.6121917
7806A3A12245771	CD244	1	0.617994	1
7806A3A12234677	CDK9	1	0.952237	1
8164A3A13871643	angiotensin II type 2 receptor	1	0.835563	1
7806A3A12233930	ADH1A	1	0.648874	1
7806A3A12243341	WBP-1	1	0.0612611	0.369381
7806A3A12235193	defensin alpha 1	1	0.0612611	0.369381
7806A3A12251106	LEAP-2	1	0.172754	0.7042422
7806A3A12238352	PSMC5	1	0.301091	0.9133006
7806A3A12237280	proliferation marker KI-67	1	1	1
7806A3A12237566	NEDD4	1	0.785256	1
7806A3A12253140	APOBEC3H	1	0.445692	1
7806A3A12248018	nuclear receptor binding SET domain protein 1	1	0.836714	1
7806A3A12243929	BSCL2	1	0.752866	1
7806A3A12242438	OS9	1	0.184295	0.7289657
7806A3A12234596	MS4A3	1	0.166923	0.6918808
7806A3A12239008	SGLT1	1	0.904258	1
7806A3A12239017	SLC6A4	1	0.999994	1
7806A3A12251072	APOA5	1	0.96822	1
7806A3A12245183	IL20	1	0.806731	1
8132A3A13708188	LAMP1	1	0.0069996	0.0764215
8164A3A13896916	CD1	1	1	1
7806A3A12254299	CrCl	1	0.35306	0.9902274
7806A3A12244447	IGHV3-23	1	0.413651	1
7806A3A12235226	Sept 1	1	0.310841	0.9231193
7806A3A12237949	Vit	1	0.986224	1
7806A3A12256970	OR52N2	1	0.0139502	0.1319171
7806A3A12258036	KPNA7	1	0.054644	0.3470145
7945A3A13273435	MAGOHB	1	0.0069996	0.0764215
987A3A3498299	mecA	1	0.824832	1
7806A3A12253238	DHX36	1	0.161051	0.6797531
7806A3A12248548	MRPL24	1	0.0139502	0.1319171
7806A3A12235100	CYP2E1	1	1	1
8164A3A13874758	Smad7	1	0.997859	1
7806A3A12234589	CD3E	1	0.885879	1
7806A3A12238538	retinol-binding protein 4	1	0.996054	1
7806A3A12235655	FGl1	1	0.260692	0.8595188
7806A3A12258300	mir-27b	1	0.774433	1
7806A3A12246341	FBXO34	1	0.0069996	0.0764215
7806A3A12244918	SPC1	1	0.118769	0.5701241
7784A3A12486709	NFIA	1	0.0069996	0.0764215
7806A3A12248105	TPP	1	0.590196	1
7806A3A12246092	PH4	1	0.959647	1
8164A3A13899104	ITGB4	1	0.628578	1
7806A3A12243228	SIRT4	1	0.587307	1
7332A3A11183457	CFI	1	0.0479802	0.3175722
7806A3A12234714	CENPF	1	0.805369	1
7784A3A12474483	TMPRSS2	1	0.0139502	0.1319171
7806A3A12252673	Sept 10	1	0.239626	0.8285171
7806A3A12240817	proteinase-activated receptor 4	1	0.310841	0.9231193
7806A3A12238258	MAPK10	1	0.60155	1
8132A3A13726843	SKP2	1	0.0069996	0.0764215
8164A3A13874943	MPO	1	0.990028	1
7806A3A12237402	ND5	1	0.845637	1
7806A3A12261665	HEP	1	0.547848	1
7806A3A12242160	map of 126	1	0.343907	0.9734154
7806A3A12252724	BTLA	1	0.752866	1
7806A3A12235600	CCA	1	0.91622	1
7806A3A12243115	DBS	1	0.563453	1
7806A3A12238067	PLOD2	1	0.677258	1
7806A3A12247711	MS4A7	1	0.0808358	0.4469213
7806A3A12249871	LC3	1	0.999986	1
7806A3A12249117	ZBP1	1	0.421831	1
7806A3A12238142	Oct 8	1	0.4905	1
7806A3A12234121	APOC3	1	0.999901	1
8164A3A13888869	VISTA	1	0.370984	1
8347A3A14196213	LMP-1	1	0.875842	1
8164A3A13872551	CatK	1	0.999835	1
8164A3A13897228	interferon alpha	1	0.996373	1
7806A3A12261078	SNHG20	1	0.223433	0.8072042
7806A3A12235157	DBH	1	0.987248	1
7699A3A11867001	COX2	1	0.0139502	0.1319171
6040A3A8551708	ACE2	1	0.0069996	0.0764215
8164A3A13874911	MMP2	1	1	1
8164A3A13875898	cyclooxygenase 1	1	0.999997	1
7806A3A12256092	GPR141	1	0.0208522	0.1768859
7943A3A13195801	SOCS1	1	0.0872696	0.4704674
7806A3A12237177	MARK3	1	0.736738	1
7869A3A12509303	GSS	1	0.149182	0.6486418
8164A3A13874649	leukemia inhibitory factor	1	0.999995	1
7806A3A12258366	CCL3L3	1	0.475982	1
8164A3A13874692	BLT-1	1	0.709533	1
7806A3A12247103	neutral ceramidase	1	0.429897	1
8164A3A13907065	miR-192	1	0.472288	1
8164A3A13875278	Npm1	1	0.951561	1
7806A3A12244884	IGKV1-9	1	0.0139502	0.1319171
7806A3A12235200	HNP4	1	0.362085	0.9985468
7806A3A12235173	DDX1	1	0.301091	0.9133006
7806A3A12242966	HECW1	1	0.0345115	0.25306
7806A3A12236883	Sesame	1	0.989451	1
7806A3A12258398	beta-defensin 3	1	0.988029	1
7806A3A12240682	IL-1R7	1	0.486908	1
7806A3A12242290	HWH	1	0.137145	0.6212812
7806A3A12234343	brain derived neurotrophic factor	1	0.996782	1
8157A3A13974342	Cytochrome P450 1A2	1	0.999989	1
8164A3A13871962	Bim	1	0.999946	1
7806A3A12238319	presenilin-1	1	1	1
7806A3A12242615	FSL-1	1	0.717581	1
7806A3A12242975	Graf I	1	0.3485	0.9830143
7806A3A12235678	FOXC1	1	0.928216	1
7806A3A12256519	thymocyte-expressed molecule involved in selection	1	0.190004	0.7354528
8157A3A13976392	CXCL5	1	0.343907	0.9734154
7818A3A12310109	NLRP1	1	0.0139502	0.1319171
7806A3A12239657	TSC2	1	0.999985	1
7806A3A12260017	WIPF3	1	0.054644	0.3470145
7806A3A12238490	recA	1	1	1
7806A3A12236573	Tenascin-C	1	0.999997	1
7806A3A12252555	RC3H1	1	0.178545	0.7135615
7806A3A12239869	LuxS	1	0.518341	1
8164A3A13886129	27KDa	1	0.967996	1
8164A3A13877682	tumor suppressor P53	1	1	1
7806A3A12235280	DNMT3B	1	0.99836	1
7806A3A12249031	PNPLA3	1	0.98553	1
7806A3A12234133	AQP5	1	0.954847	1
7806A3A12247428	Tech	1	0.329935	0.9492145
7806A3A12237270	CD99	1	0.999923	1
7806A3A12248718	MMRN2	1	0.166923	0.6918808
7806A3A12234839	chymase	1	0.999011	1
8164A3A13874688	Xcl1	1	0.761395	1
8164A3A13875740	Alpha-MSH	1	0.999967	1
7806A3A12263781	Eln	1	0.554156	1
8164A3A13871937	BK1 receptor	1	0.563453	1
8157A3A13988293	interleukin-33	1	0.646399	1
7806A3A12237464	Mybpc3	1	0.935395	1
7806A3A12255558	ESP-32	1	0.0479802	0.3175722
7806A3A12236913	KIR2DL4	1	0.566508	1
7806A3A12244294	STK39	1	0.449572	1
8164A3A13894216	GP73	1	0.223433	0.8072042
8157A3A13975333	cathepsin L	1	0.945418	1
7806A3A12235691	Melan-A	1	0.999961	1
8175A3A14068440	Furin	1	0.0069996	0.0764215
1009A3A3527931	gtfB	1	0.827276	1
8164A3A13896938	H-2	1	1	1
7806A3A12239118	MnSOD	1	0.999391	1
7869A3A12514869	Rsad2	1	0.0139502	0.1319171
7806A3A12238307	HTRA1	1	0.976833	1
7806A3A12239667	titin	1	0.997062	1
7806A3A12242858	RAB18	1	0.301091	0.9133006
7806A3A12250728	TCC	1	0.674983	1
7869A3A12509938	NLRP12	1	0.0069996	0.0764215
8164A3A13876577	CD62P	1	0.581469	1
7806A3A12257539	MUC21	1	0.190004	0.7354528
8164A3A13891660	UBC-Cre	1	0.977316	1
7806A3A12248107	PARP12	1	0.0872696	0.4704674
8164A3A13879374	neutrophil elastase	1	0.995095	1
7806A3A12253013	CLEC12A	1	0.483292	1
7806A3A12239138	SP2	1	0.587307	1
7806A3A12245582	TRPV2	1	0.609859	1
8157A3A13975112	Icam	1	0.996399	1
7806A3A12237783	P2RX4	1	0.798411	1
7806A3A12250957	C1QTNF1	1	0.956711	1
7869A3A12505115	mink	1	0.112558	0.5517893
7806A3A12234298	beta-2-microglobulin	1	0.999823	1
7806A3A12236747	IL-13RA1	1	0.742227	1
7806A3A12242750	IKZF3	1	0.749369	1
7806A3A12234277	ATP6AP1	1	0.821102	1
8164A3A13891740	IRE1alpha	1	0.988361	1
8157A3A13974520	PAI-1	1	0.994028	1
7806A3A12241858	MRP4	1	0.98001	1
8164A3A13872823	DNMT1	1	0.99944	1
7806A3A12241260	G6PDH	1	0.531686	1
7806A3A12250442	beta5	1	0.829686	1
7806A3A12259900	MS4A4E	1	0.0612611	0.369381
7806A3A12290187	TALAM1	1	0.0139502	0.1319171
7806A3A12252395	beta-1	1	0.939353	1
8164A3A13875098	Mybpc3	1	0.315665	0.9305933
8164A3A13875093	myxovirus resistance protein 2	1	0.396943	1
7806A3A12238412	PTPN13	1	0.547848	1
8164A3A13899950	OS9	1	0.0479802	0.3175722
7806A3A12239234	STC1	1	0.865869	1
7806A3A12248652	PALB2	1	0.991575	1
7806A3A12239015	TAUT	1	0.250233	0.8441096
7806A3A12242200	CTCF	1	0.978404	1
7806A3A12233912	ADCY2	1	0.551013	1
7806A3A12237550	B22	1	0.45725	1
8164A3A13872314	Suppressor of cytokine signaling	1	0.969532	1
7806A3A12235973	CBD	1	0.697029	1
7806A3A12245658	SBP1	1	0.310841	0.9231193
7806A3A12239186	SRM	1	0.595913	1
8164A3A13901914	SETDB2	1	0.0872696	0.4704674
7806A3A12234464	CARBONIC ANHYDRASE 11	1	0.0808358	0.4469213
8164A3A13874266	Inhbb	1	0.453425	1
7806A3A12237913	PDYN	1	0.882627	1
8164A3A13872451	corticotropin-releasing hormone	1	0.999969	1
7806A3A12249317	cytidine deaminase	1	0.970994	1
8164A3A13877611	TNFR1	1	0.999923	1
7806A3A12236067	GNAI2	1	0.255481	0.8510296
8164A3A13874314	ITGA6	1	0.913225	1
7806A3A12241981	LDP	1	0.178545	0.7135615
7806A3A12248940	ATHL1	1	0.0139502	0.1319171
7806A3A12239059	EMT	1	0.957014	1
7806A3A12236493	RAB	1	0.985117	1
7806A3A12243463	MAFF	1	0.244948	0.8327751
7806A3A12245544	TNFRSF12A	1	0.72152	1
7806A3A12238262	mitogen-activated protein kinase 3	1	0.999253	1
8164A3A13894781	phosphatidylserine receptor	1	0.528385	1
8164A3A13875179	NEDD4	1	0.769629	1
7806A3A12258227	miR-144	1	0.782218	1
8164A3A13875296	NRAS	1	0.997782	1
7806A3A12243114	MAD5	1	0.863012	1
7806A3A12237133	MAFG	1	0.370984	1
7806A3A12242479	GLIPR1	1	0.206894	0.7732831
7806A3A12243701	LRRN2	1	0.0872696	0.4704674
7806A3A12238602	RGS2	1	0.604339	1
7806A3A12247956	Rtp4	1	0.131063	0.6121917
7806A3A12249933	MS4A14	1	0.0277058	0.2187644
7995A3A13566810	TLR8	1	0.0612611	0.369381
7806A3A12234871	COL3A1	1	0.992201	1
7806A3A12247719	TP53INP2	1	0.595913	1
8164A3A13896261	KRT5	1	0.932614	1
7806A3A12236792	IRAK1	1	0.954847	1
7806A3A12236737	IL11RA	1	0.396943	1
7806A3A12245410	MRTO4	1	0.0479802	0.3175722
7806A3A12234194	acid ceramidase	1	0.830878	1
8164A3A13875816	PRL	1	0.966383	1
7806A3A12253114	IFNLR1	1	0.421831	1
7806A3A12245496	GP73	1	0.587307	1
7806A3A12235187	Dhx9	1	0.623323	1
8164A3A13877972	Miz1	1	0.315665	0.9305933
7806A3A12234933	ceruloplasmin	1	1	1
7806A3A12256069	OATP4C1	1	0.212446	0.7880767
7806A3A12236308	hyaluronan synthase 2	1	0.934019	1
7806A3A12245178	CHST11	1	0.195674	0.74862
7818A3A12309654	Furin	1	0.255481	0.8510296
7806A3A12242199	lipophilin-A	1	0.828485	1
8164A3A13900166	GFR	1	0.325212	0.9415135
8011A3A13366362	toll-like receptor-2	1	0.479649	1
7806A3A12245781	STK26	1	0.166923	0.6918808
7806A3A12236803	ISL1	1	0.931179	1
7806A3A12238996	CD150	1	0.917967	1
7806A3A12234500	Calmodulin 1	1	0.593065	1
7806A3A12235222	DHODH	1	0.291203	0.9039046
7806A3A12241757	Ac1	1	0.521713	1
8164A3A13873931	histamine H1-receptor	1	0.917967	1
7806A3A12236532	CSA	1	0.999994	1
8164A3A13873184	FES	1	0.584398	1
8164A3A13899071	EDEM1	1	0.276109	0.8831915
7806A3A12235346	DQ2	1	0.992146	1
7806A3A12235002	GMR	1	0.77758	1
7806A3A12246242	YTHDF1	1	0.776012	1
7869A3A12522528	Saa1	1	0.0936584	0.4951206
7806A3A12247694	Apa1	1	0.690577	1
7806A3A12238187	C-RP	1	0.658602	1
7806A3A12258195	miR-10a	1	0.751124	1
7806A3A12245690	cutA	1	0.178545	0.7135615
7806A3A12247836	GAS5	1	0.90821	1
7806A3A12249452	BCL2L12	1	0.464822	1
7806A3A12242383	HAR-type	1	0.9484	1
7806A3A12236921	KIR2DS4	1	0.43785	1
7806A3A12234029	SLs	1	0.733013	1
7806A3A12239664	TTK	1	0.72347	1
8164A3A13873951	Hspa1b	1	0.648874	1
7806A3A12247975	Mbd2	1	0.636323	1
7806A3A12246941	CSs	1	0.633759	1
8164A3A13894270	cyclophilin D	1	0.92245	1
8164A3A13873391	Glu	1	0.994588	1
7806A3A12237143	MAF	1	0.928216	1
7806A3A12245072	ALG6	1	0.195674	0.74862
7806A3A12234944	claudin-7	1	0.771242	1
7806A3A12249530	TTTY14	1	0.054644	0.3470145
7869A3A12506998	Fibronectin 1	1	0.0277058	0.2187644
7806A3A12237326	CD200	1	0.979003	1
7806A3A12235485	Ephrin type-A receptor 4	1	0.794118	1
7806A3A12238774	RRM2	1	0.90821	1
8164A3A13875747	PPARalpha	1	1	1
8164A3A13903949	cyclophilin A	1	0.875842	1
7806A3A12240919	AIF	1	0.946179	1
7806A3A12253317	TIZ	1	0.0743567	0.4246676
7806A3A12236278	granzyme K	1	0.475982	1
7806A3A12244117	IBD	1	0.250233	0.8441096
7806A3A12238174	Ppp1cc	1	0.206894	0.7732831
7806A3A12234949	C3b/C4b receptor	1	0.999959	1
7806A3A12241242	microsomal prostaglandin E synthase-1	1	0.974258	1
7806A3A12241328	IKBKE	1	0.581469	1
7806A3A12247123	MUC13	1	0.413651	1
7806A3A12258346	miR-98	1	0.633759	1
7806A3A12294499	P17	1	0.919678	1
7806A3A12237136	Smad7	1	0.998969	1
7806A3A12259067	tarp	1	0.98001	1
7806A3A12235612	farnesyl pyrophosphate synthase	1	0.749369	1
7806A3A12234881	CTD	1	0.425878	1
7806A3A12262515	Siglec-14	1	0.155137	0.6636949
7806A3A12249644	zic4	1	0.281175	0.8909969
7806A3A12242196	SPINT2	1	0.668061	1
7806A3A12259271	IL-6-AS1	1	0.0069996	0.0764215
7806A3A12235954	GBA	1	0.999694	1
8164A3A13872031	Cav1.2	1	0.936296	1
7806A3A12237179	mat-type	1	0.91563	1
8164A3A13906779	AIM2	1	0.96444	1
7806A3A12235965	Vitamin D-Binding Protein	1	0.99533	1
7806A3A12235025	CSNK2B	1	0.61259	1
3095A3A5266602	miR-6300	1	0.0069996	0.0764215
7869A3A12506982	GSDME	1	0.0069996	0.0764215
7806A3A12239094	Alpha Synuclein	1	0.991808	1
7806A3A12234959	CREB-binding protein	1	0.99499	1
8157A3A13975286	CYP	1	0.999966	1
7806A3A12245136	PPD	1	0.995826	1
8157A3A13978753	eosinophil cationic protein	1	0.271006	0.8741396
8164A3A13872916	PAC-1	1	0.821102	1
7806A3A12248316	AHNAK	1	0.486908	1
7806A3A12234970	CRKL	1	0.763065	1
8164A3A13894597	ACACA	1	0.939353	1
8157A3A13978967	zinc finger antiviral protein	1	0.0612611	0.369381
8164A3A13876611	SFTPC	1	0.834404	1
8164A3A13881272	mannosyl-oligosaccharide glucosidase	1	0.0678319	0.3952293
3774A3A6522416	Bromelain	1	0.795559	1
7806A3A12234349	CEACAM1	1	0.979727	1
7806A3A12252716	DTX3L	1	0.0808358	0.4469213
7806A3A12237629	P104	1	0.149182	0.6486418
19858A3A17399249	ACE2	1	0.0069996	0.0764215
7806A3A12242528	WWP1	1	0.343907	0.9734154
7806A3A12252093	APOBEC3D	1	0.325212	0.9415135
7806A3A12238379	EP4	1	0.991395	1
7806A3A12237984	SERPINA4	1	0.759713	1
8164A3A13872277	CoF	1	0.544661	1
7943A3A13210353	mink	1	0.239626	0.8285171
7806A3A12237256	lacryglobin	1	0.405356	1
8164A3A13888180	DDX41	1	0.137145	0.6212812
7869A3A12516260	Janus Kinase-3	1	0.0139502	0.1319171
7345A3A11218851	Bcl2	1	0.0069996	0.0764215
8164A3A13872076	CAPNS1	1	0.362085	0.9985468
7806A3A12239356	transcription factor 4	1	0.900137	1
7806A3A12294524	p24	1	0.999992	1
8164A3A13885032	BRD3	1	0.320455	0.9359449
7806A3A12249942	SLC9A7	1	0.320455	0.9359449
7806A3A12239484	THBS3	1	0.239626	0.8285171
7806A3A12240918	INa	1	0.864923	1
7806A3A12240033	mannosyl-oligosaccharide glucosidase	1	0.178545	0.7135615
7806A3A12237381	CES1	1	0.994433	1
7806A3A12235232	Dlg1	1	0.648874	1
7869A3A12518217	CXCR3	1	0.0345115	0.25306
7943A3A13202989	ZDHHC17	1	0.0069996	0.0764215
8164A3A13875077	MUC5AC	1	0.966618	1
7806A3A12238882	CCL16	1	0.660992	1
7806A3A12247074	NAP	1	0.772843	1
7806A3A12247921	CDH23	1	0.72347	1
8164A3A13878233	BLyS	1	0.996736	1
6354A3A9101335	apelin	1	0.223433	0.8072042
7806A3A12237028	LGALS1	1	0.999958	1
7806A3A12240556	NUMB	1	0.776012	1
7806A3A12259227	HBD-4	1	0.648874	1
7806A3A12237489	myosin light chain 2	1	0.832062	1
8164A3A13880816	Galectin-8	1	0.334625	0.9603127
7806A3A12235032	cystatin-C	1	0.95993	1
7869A3A12518469	HSP90AA1	1	0.054644	0.3470145
7806A3A12239105	SNRPD2	1	0.166923	0.6918808
8164A3A13913548	MiR-451a	1	0.305983	0.9200757
7806A3A12243305	ribosomal protein L13a	1	0.468568	1
7806A3A12246171	BEST2	1	0.137145	0.6212812
7806A3A12236484	HPD	1	0.628578	1
7806A3A12266250	MEF2B	1	0.260692	0.8595188
7806A3A12235294	DSC	1	0.620668	1
7806A3A12238403	PTPN1	1	0.989451	1
7806A3A12238885	CCL25	1	0.719557	1
7806A3A12241082	Cerberus	1	0.223433	0.8072042
8157A3A13975427	Hmgb1	1	0.958497	1
7806A3A12238293	PRS	1	0.745823	1
7806A3A12235461	EP300	1	0.97944	1
8164A3A13902425	ABBA	1	0.0743567	0.4246676
8164A3A13899040	proton pump	1	0.904258	1
7806A3A12258242	microRNA-185	1	0.679517	1
7806A3A12235694	FLNA	1	0.983463	1
7806A3A12237027	low-density lipoprotein receptor	1	1	1
383664A3A31258360	furin	1	0.0345115	0.25306
7943A3A13188818	toll-like receptor-2	1	0.0936584	0.4951206
7806A3A12235203	desmin	1	1	1
7806A3A12249434	PV-1	1	0.52506	1
7806A3A12237872	PDE1A	1	0.301091	0.9133006
7806A3A12240905	ATP6V0D1	1	0.531686	1
7806A3A12244401	IGHV4-34	1	0.271006	0.8741396
8164A3A13901111	INSIG1	1	0.461049	1
8164A3A13873270	c-Fos protein	1	0.986224	1
7806A3A12242235	N-acetyl-beta-glucosaminidase	1	1	1
7806A3A12239886	cellular nucleic acid-binding protein	1	0.572556	1
8157A3A13977211	peroxisome proliferator-activated receptor gamma coactivator 1-alpha	1	0.996499	1
7806A3A12241867	receptor activity modifying protein 1	1	0.701256	1
7806A3A12253337	CLYBL	1	0.518341	1
7869A3A12517634	Eln	1	0.0208522	0.1768859
7806A3A12235546	EZH2	1	1	1
7806A3A12262781	Apal	1	0.212446	0.7880767
8157A3A13976548	Cd200r1	1	0.461049	1
7806A3A12267003	hsa-miR-1305	1	0.143184	0.6318684
7869A3A12507955	TMPRSS4	1	0.0069996	0.0764215
7806A3A12246109	LEPR	1	0.878431	1
8164A3A13890737	IL-33	1	0.999998	1
8164A3A13875185	NEK2	1	0.357588	0.99727
7806A3A12236108	GPC1	1	0.849914	1
7806A3A12234623	heparan sulfate proteoglycan	1	0.994738	1
7806A3A12243374	DRP1	1	0.935395	1
7806A3A12236583	Id2	1	0.919678	1
7806A3A12234220	ATA	1	0.999732	1
7806A3A12245562	phosphatidylserine-specific phospholipase A1	1	0.276109	0.8831915
7806A3A12246691	NAGK	1	0.172754	0.7042422
8164A3A13872336	claudin5	1	0.989302	1
7806A3A12237127	MXD1	1	0.692743	1
7806A3A12255957	gen	1	0.986224	1
7806A3A12237693	NRL	1	0.61259	1
7806A3A12233870	ACL	1	0.969317	1
7806A3A12247448	CCR4	1	0.997223	1
7806A3A12241735	KIF20A	1	0.60155	1
789480A3A34328244	ACE2	1	0.0069996	0.0764215
7806A3A12235558	F13A1	1	0.749369	1
7806A3A12246692	nAChR alpha9	1	0.118769	0.5701241
7806A3A12235448	ENG	1	0.999873	1
8164A3A13881012	S1P	1	0.789734	1
8164A3A13873172	CD16	1	0.995025	1
7806A3A12252112	ACTT-2	1	0.0345115	0.25306
8157A3A13996351	Pentraxin 3	1	0.315665	0.9305933
7685A3A11913667	MME	1	0.0139502	0.1319171
8157A3A13974659	TNF-a	1	0.999945	1
8164A3A13893397	Dhx32	1	0.0412695	0.288553
7806A3A12243223	EXOSC2	1	0.118769	0.5701241
7806A3A12238037	phospholipase a2 group IIA	1	0.836714	1
7784A3A12494088	ZNF608	1	0.0069996	0.0764215
7806A3A12246864	PACT	1	0.339282	0.9656702
7806A3A12234130	CD95	1	0.999936	1
8164A3A13906837	MAP1LC3	1	0.143184	0.6318684
6354A3A9096523	Ace	1	0.0612611	0.369381
7806A3A12253206	CV2	1	0.665721	1
7806A3A12234627	CD47	1	0.997338	1
7806A3A12239500	transketolase	1	0.934481	1
7806A3A12238256	MAPK11	1	0.544661	1
8164A3A13876901	Srebp1	1	0.999199	1
7869A3A12505843	GSDMB	1	0.0069996	0.0764215
8164A3A13874906	MMP12	1	0.974972	1
8164A3A13871828	acid ceramidase	1	0.607109	1
8164A3A13875679	Plaur	1	0.861074	1
7806A3A12252403	MATE2-K	1	0.62596	1
7806A3A12245330	YARS2	1	0.521713	1
7806A3A12234444	Ang2	1	0.794118	1
8157A3A13975047	beta-arrestin1	1	0.595913	1
7806A3A12239358	TBX3	1	0.756313	1
7806A3A12249350	LC3B	1	0.998045	1
7685A3A11903107	DPP4	1	0.0678319	0.3952293
7806A3A12242674	PADI2	1	0.665721	1
7806A3A12242844	m receptor	1	0.803997	1
7806A3A12233956	ADORA2B	1	0.783742	1
8164A3A13894813	EMA	1	0.201304	0.7622682
7806A3A12254535	KCNRG	1	0.100002	0.5067228
7806A3A12242959	VWA8	1	0.0678319	0.3952293
7806A3A12237236	RAB8A	1	0.566508	1
7806A3A12243303	Slc39a14	1	0.494066	1
8164A3A13874589	LAMP1	1	0.999998	1
7806A3A12241026	Morpheus	1	0.276109	0.8831915
7806A3A12235199	HBD-1	1	0.977789	1
7869A3A12513699	ICAM1	1	0.0808358	0.4469213
7806A3A12234643	CD79B	1	0.888258	1
8132A3A13715355	STING1	1	0.0069996	0.0764215
7806A3A12242005	PIs	1	0.994433	1
8164A3A13876733	SWE	1	0.866807	1
7806A3A12271079	MiR-5197	1	0.0139502	0.1319171
7806A3A12237813	p21-activated kinase 1	1	0.73858	1
7806A3A12244235	Sestrin-1	1	0.396943	1
8132A3A13724130	SQSTM1	1	0.0069996	0.0764215
7806A3A12239423	tryptophan 2,3-dioxygenase	1	0.904928	1
8164A3A13873144	FASN	1	0.999999	1
7806A3A12239032	NHE3	1	0.852008	1
8164A3A13899935	cytoskeleton-associated protein 4	1	0.997103	1
7806A3A12241908	DLEU2	1	0.656196	1
7806A3A12236926	CD117	1	1	1
7806A3A12240555	NCOA1	1	0.957613	1
7806A3A12234941	CPN	1	0.615301	1
7876A3A12979814	ACE2	1	0.0069996	0.0764215
7806A3A12236622	interferon alpha-4	1	0.239626	0.8285171
7300A3A11139418	STING	1	0.100002	0.5067228
8164A3A13878231	Toll-like receptor 2	1	0.999984	1
7806A3A12245086	DPP7	1	0.441785	1
7806A3A12246410	ARHGAP17	1	0.0872696	0.4704674
7806A3A12241938	TRIM22	1	0.388411	1
7806A3A12234783	AChE	1	0.999104	1
7806A3A12234900	sST2	1	0.993594	1
7806A3A12234223	activating transcription factor 4	1	0.998113	1
6354A3A9105117	Dpp4	1	0.0208522	0.1768859
222906A3A28568272	ndhF	1	0.0069996	0.0764215
7869A3A12512145	NLRC4	1	0.0069996	0.0764215
8164A3A13896080	PAD4	1	0.449572	1
7806A3A12235689	win	1	0.999984	1
8164A3A13908065	Ppp1cc	1	0.137145	0.6212812
7806A3A12236098	GOLGA3	1	0.0872696	0.4704674
7806A3A12239589	HSP90B1	1	0.967314	1
8157A3A13977925	GGT	1	0.926171	1
7806A3A12235063	CTSE	1	0.672692	1
8164A3A13874263	Ship	1	0.841238	1
7869A3A12520521	GPT	1	0.195674	0.74862
8164A3A13873906	heparanase	1	0.993815	1
8164A3A13877877	Ezrin	1	0.976995	1
7806A3A12238514	Rasa	1	0.976005	1
8164A3A13873969	5-Hydroxytryptamine 2A Receptor	1	0.749369	1
7806A3A12236731	IL-5Ralpha	1	0.595913	1
7806A3A12239300	TAC-3	1	0.604339	1
7806A3A12236947	KPNA5	1	0.0479802	0.3175722
7806A3A12236537	HSPA6	1	0.475982	1
7806A3A12236443	HNRNPK	1	0.818571	1
6354A3A9082463	Anpep	1	0.0139502	0.1319171
7806A3A12242272	nestin	1	1	1
7806A3A12235537	envoplakin	1	0.863971	1
7806A3A12255149	DDX51	1	0.0345115	0.25306
7806A3A12239783	por	1	0.858115	1
7806A3A12234254	PDE	1	0.989598	1
7806A3A12236654	IGF2	1	1	1
7806A3A12235230	PHE3	1	0.587307	1
7806A3A12236794	IRAK2	1	0.379759	1
7806A3A12235900	ECA2	1	0.62596	1
8164A3A13876927	signal transducer and activator of transcription 3	1	1	1
7806A3A12237225	MEA1	1	0.497608	1
7869A3A12517458	AGT	1	0.0678319	0.3952293
7806A3A12237119	NBR1	1	0.343907	0.9734154
7806A3A12237976	PEX	1	0.958497	1
7806A3A12239247	AURKA	1	0.997751	1
8164A3A13874039	IFNAR2	1	0.392692	1
7806A3A12236976	KRT19	1	1	1
8132A3A13715183	CGAS	1	0.0069996	0.0764215
7806A3A12241007	UBE2L6	1	0.255481	0.8510296
7806A3A12243658	DMT1	1	0.779137	1
7806A3A12235056	CTNNB1	1	0.999996	1
7806A3A12246472	APS1	1	0.325212	0.9415135
7784A3A12479404	BMP2	1	0.0069996	0.0764215
8164A3A13917812	TIGIT	1	0.633759	1
7806A3A12249800	COG8	1	0.100002	0.5067228
7943A3A13189204	EAP	1	0.310841	0.9231193
8132A3A13715876	OS9	1	0.0069996	0.0764215
7806A3A12247783	KLHL12	1	0.0936584	0.4951206
7806A3A12246470	Vps13D	1	0.131063	0.6121917
7806A3A12245094	DMGDH	1	0.155137	0.6636949
7806A3A12241611	TL1	1	0.779137	1
7806A3A12237192	MC2	1	0.607109	1
7806A3A12238499	RARA	1	0.999896	1
7806A3A12246893	SELENOS	1	0.479649	1
7806A3A12238489	RAG2	1	0.905594	1
7565A3A11555797	TRIM21	1	0.0069996	0.0764215
7806A3A12252105	Boris	1	0.870498	1
7806A3A12242633	MiToS	1	0.137145	0.6212812
7869A3A12517882	DNM1L	1	0.0277058	0.2187644
8164A3A13875161	NBR1	1	0.320455	0.9359449
7806A3A12235913	GAD	1	0.998886	1
8157A3A13974822	BNP	1	0.982135	1
7806A3A12240344	PLA2	1	0.995363	1
8164A3A13876937	STAT2	1	0.855094	1
7806A3A12242950	foe	1	0.433887	1
7806A3A12242558	PRSS23	1	0.149182	0.6486418
185304A3A27972437	ndhF	1	0.0069996	0.0764215
8164A3A13874757	transcription factor Maf	1	0.960765	1
7806A3A12234901	KLF6	1	0.810761	1
7806A3A12242369	FGL2	1	0.609859	1
7806A3A12237843	pyruvate carboxylase	1	0.848856	1
7818A3A12310072	TMPRSS4	1	0.0208522	0.1768859
7806A3A12235576	ACSL3	1	0.265867	0.866446
7806A3A12244469	IGHV1-24	1	0.0069996	0.0764215
8164A3A13872926	Sphingosine-1-phosphate receptor 1	1	0.988997	1
7806A3A12252597	BPIFB4	1	0.0808358	0.4469213
7806A3A12247687	PTB	1	0.590196	1
7806A3A12246163	SWT1	1	0.0069996	0.0764215
7806A3A12254058	Gripe	1	0.190004	0.7354528
7806A3A12236551	heparan sulfate proteoglycan 2	1	0.997203	1
8164A3A13893209	PCSK9	1	0.97315	1
7806A3A12238005	PI3Kdelta	1	0.958788	1
7806A3A12250618	REEP6	1	0.0612611	0.369381
7947A3A13251008	ACE2	1	0.0069996	0.0764215
7806A3A12240705	SYNGAP1	1	0.803997	1
7806A3A12238744	ribosomal protein S6 kinase beta 1	1	0.993727	1
7806A3A12240537	PDE8B	1	0.329935	0.9492145
7806A3A12237203	MCL-1	1	1	1
7806A3A12237130	MADH4	1	1	1
8164A3A13900779	CYP	1	0.977475	1
7806A3A12245134	ferroportin-1	1	0.776012	1
7806A3A12241578	P2Y14	1	0.370984	1
7806A3A12235201	defensin alpha 5	1	0.486908	1
7806A3A12236348	CFHR1	1	0.832062	1
7806A3A12240985	Aim 1	1	0.96021	1
8164A3A13876276	retinol-binding protein 4	1	0.751124	1
7806A3A12237281	MLH1	1	1	1
8164A3A13872856	DRA	1	0.77758	1
7806A3A12243763	ZBTB20	1	0.357588	0.99727
7806A3A12259392	miR-146b	1	0.761395	1
8157A3A13979699	spice	1	0.758019	1
7806A3A12236735	IL-12A	1	0.861074	1
7806A3A12241834	ZAKI-4	1	0.206894	0.7732831
7806A3A12240471	PIR	1	0.3841	1
7806A3A12234407	PBR	1	0.999583	1
7806A3A12245317	LAP3	1	0.534964	1
8164A3A13898742	P2Y14	1	0.310841	0.9231193
7806A3A12237562	CI 4-9	1	0.271006	0.8741396
7806A3A12234006	Adenylate Kinase 2	1	0.475982	1
7995A3A13580485	CXCL-10	1	0.0936584	0.4951206
8164A3A13874910	Neprilysin	1	0.99597	1
8164A3A13902186	GB-2	1	0.255481	0.8510296
7806A3A12236661	CCN family member 1	1	0.942263	1
7806A3A12246214	BCOR	1	0.822354	1
7806A3A12244125	PPA2	1	0.118769	0.5701241
7806A3A12234938	CPB2	1	0.798411	1
7806A3A12246790	CCDC88A	1	0.852008	1
8011A3A13366266	Furin	1	0.379759	1
7806A3A12235451	EndoG	1	0.808084	1
8164A3A13879448	IL-22	1	0.999991	1
7806A3A12238040	Plaur	1	0.988523	1
7806A3A12275124	miR-8066	1	0.0069996	0.0764215
7943A3A13188905	RIG-I	1	0.396943	1
7806A3A12255612	Mar 4	1	0.0743567	0.4246676
7806A3A12238374	PTGDR	1	0.703347	1
7806A3A12250092	CGNL1	1	0.0808358	0.4469213
7806A3A12245245	HBP	1	0.36655	1
7806A3A12247349	MuRF	1	0.149182	0.6486418
8164A3A13902633	OAS3	1	0.124938	0.5899187
8157A3A13974999	IL10	1	0.996736	1
8164A3A13894648	WWP1	1	0.291203	0.9039046
8164A3A13877583	TLR1	1	0.903583	1
7806A3A12234097	ANT	1	0.861074	1
7806A3A12238375	PTGER3	1	0.944255	1
7806A3A12238853	gamma ENaC	1	0.733013	1
7806A3A12239258	STXBP2	1	0.494066	1
7806A3A12239824	WNT3	1	0.72347	1
8164A3A13894701	TIM	1	0.401164	1
7806A3A12239584	TPO	1	0.999999	1
7806A3A12238845	SCN5A	1	0.999971	1
8074A3A13762028	MX1	1	0.0139502	0.1319171
7806A3A12234034	ALOX12	1	0.544661	1
[truncated: 1,448 more rows]

## Sheet: COVID_significant_genes
Object id	Object label	Documents Number	Co-occurrence Score	FDR (<0.05)
7806A3A12247757	angiotensin-converting enzyme 2	2587	0	0
7806A3A12239531	TMPRSS2	522	0	0
2245782A3A38933122	Nucleoprotein	513	3.56138e-08	2.490122e-06
2245782A3A38933110	spike glycoprotein	485	6.23809e-08	3.187754e-06
7806A3A12234700	S protein	344	0	0
8164A3A13886575	angiotensin-converting enzyme 2	332	4.09404e-08	2.642691e-06
2245782A3A38933113	orf1ab	183	0	0
7806A3A12236721	IL6	169	4.12324e-08	2.642691e-06
7806A3A12237799	furin	156	0	0
7806A3A12236768	c-x-c motif chemokine ligand 10	130	1.46594e-08	1.208004e-06
7806A3A12236710	interleukin-1 receptor antagonist	116	4.63945e-08	2.817041e-06
7806A3A12236730	interleukin-6 receptor	107	1.78172e-08	1.434077e-06
7806A3A12243888	AST	106	3.61518e-08	2.490122e-06
2245782A3A38933108	orf8	100	0	0
2245782A3A38933117	ORF3a	98	0	0
7806A3A12236631	interferon beta	96	3.1201e-08	2.347536e-06
7806A3A12235286	DPP4	95	4.45569e-08	2.773324e-06
7806A3A12235164	ACE1	79	0	0
7806A3A12239554	cTnI	73	0	0
7806A3A12250893	NLRP3	67	5.33788e-08	2.979742e-06
7806A3A12234398	CD147	67	0	0
8164A3A13879363	TMPRSS2	65	0	0
7806A3A12235065	cathepsin L	63	0	0
7806A3A12239800	S-protein	51	3.66935e-08	2.490122e-06
7806A3A12240698	NRP1	51	0	0
7806A3A12239771	PCT	49	1.07862e-08	9.823957e-07
7806A3A12236722	IL8	47	0.000834126	0.01937524
7806A3A12237928	PF4	47	0	0
7806A3A12242547	ADAMTS13	47	5.94499e-08	3.187754e-06
7806A3A12241676	nsp3	44	0	0
7806A3A12239298	ADAM17	43	1.3267e-08	1.119929e-06
2245782A3A38933106	ORF7a	41	7.27496e-08	3.546287e-06
7806A3A12235061	Cathepsin B	39	2.14502e-06	7.897781e-05
7806A3A12245501	Toll-like receptor 7	37	0	0
7806A3A12238287	protein S	37	0.00108596	0.02440589
2245782A3A38933121	Non-Structural Protein 6	37	4.02183e-08	2.642691e-06
8157A3A13983658	angiotensin-converting enzyme 2	37	0	0
7869A3A12505299	ACE2	36	4.38705e-09	4.338166e-07
7806A3A12247888	steep	36	2.11924e-05	0.0007052586
7806A3A12253120	helicase	35	7.99444e-08	3.790241e-06
7806A3A12237677	BNP	32	1.27432e-05	0.0004366754
7806A3A12239797	ARB	31	9.04273e-07	3.597344e-05
7806A3A12293628	IL-7	29	0.000810569	0.01895527
2245782A3A38933109	ORF7b	28	0	0
2245782A3A38933105	ORF 10	27	5.25484e-08	2.979742e-06
7806A3A12233993	angiotensin II type 1 receptor	26	0.000457418	0.01114876
7806A3A12240791	Wave 1	25	0	0
7806A3A12243361	RIG-1	23	0	0
7806A3A12241990	IFITM3	21	2.72023e-08	2.092159e-06
7806A3A12237454	MX1	20	3.13209e-06	0.000114107
7806A3A12236789	IRF3	20	1.42265e-06	5.41076e-05
7806A3A12250591	SPECC1	20	6.26314e-08	3.187754e-06
7806A3A12247753	iceberg	19	3.51387e-05	0.001115734
7818A3A12304813	ACE2	19	9.30206e-08	4.236109e-06
2245782A3A38933114	membrane glycoprotein	19	0	0
7806A3A12241674	nsp1	18	6.87433e-09	6.608904e-07
7806A3A12237173	Mas	18	3.59552e-08	2.490122e-06
8164A3A13875504	furin	18	4.86974e-05	0.001487444
7806A3A12236630	IFNAR2	17	6.07189e-08	3.187754e-06
7806A3A12246259	SARS	17	0	0
7806A3A12245144	CD209	16	3.40378e-05	0.001090785
7806A3A12240466	APOL 1	16	5.17813e-07	2.133513e-05
7806A3A12241921	CD209L	16	4.48732e-08	2.773324e-06
7685A3A11917334	angiotensin-converting enzyme-2	16	0	0
7806A3A12254396	interferon-lambda1	15	3.71355e-07	1.576874e-05
7806A3A12238863	MCP-3	15	0.000486298	0.01168804
7806A3A12238823	SAA	15	0.00228845	0.0460484
7806A3A12241309	ubiquitin-like ISG15 protein	15	1.05852e-06	4.163111e-05
7806A3A12242653	eta2	14	0.000179988	0.004755255
7943A3A13191790	ACE2	14	7.65321e-08	3.678856e-06
7806A3A12234002	AGTR2	14	1.78518e-07	7.921164e-06
7806A3A12247113	TMPRSS4	14	0	0
7806A3A12247972	IFIH1	14	6.00399e-05	0.00180694
7806A3A12234308	bat	14	3.32967e-08	2.451912e-06
7806A3A12240356	NSP2	13	6.19089e-08	3.187754e-06
7806A3A12247487	MAVS	12	1.04722e-05	0.0003624428
7806A3A12248956	NTD	12	6.02894e-08	3.187754e-06
8011A3A13370106	angiotensin-converting enzyme 2	12	0	0
7806A3A12237734	2'-5'-oligoadenylate synthetase 1	12	4.22284e-07	1.760873e-05
7806A3A12247183	FDP	12	3.81143e-05	0.001199214
7806A3A12241878	sigma-1 receptor	12	8.87466e-07	3.571535e-05
7806A3A12246105	SLC6A20	11	4.81636e-08	2.873005e-06
8164A3A13887983	STING	11	0.00120444	0.02689398
7806A3A12233922	ADAR-1	11	0.000333723	0.008369676
7806A3A12250484	radical s-adenosyl methionine domain containing 2	10	7.48678e-07	3.048441e-05
7806A3A12236616	IFIT1	10	0.00228471	0.0460484
7806A3A12239085	CD169	9	2.18067e-05	0.0007187904
7806A3A12246573	SAPS 3	9	3.73602e-07	1.576874e-05
7806A3A12242202	CXCR6	9	0.000345642	0.008606237
8074A3A13744118	ACE2	9	0	0
7806A3A12255537	B0AT1	9	8.59313e-08	4.01903e-06
7806A3A12236635	IFNAR1	9	0.00225275	0.0460484
7806A3A12241960	interferon regulatory factor 9	8	8.71352e-05	0.002513124
7806A3A12235458	ENPEP	8	0.00183846	0.03879823
7806A3A12238328	MHC-iota	8	0.00126983	0.02817232
7806A3A12240444	IFITM1	8	6.76946e-05	0.00201975
7806A3A12246668	HR1	8	1.38401e-06	5.322287e-05
7806A3A12251957	ORF3	8	0.000122571	0.003448929
7806A3A12247883	muted	8	0.000550712	0.01305489
8164A3A13903565	K18	7	8.55441e-05	0.002487967
8918A3A14203275	nucleoprotein	7	6.49066e-08	3.255677e-06
7806A3A12237722	OAS2	7	2.59512e-05	0.0008473312
8157A3A13978311	TMPRSS2	6	5.29009e-10	6.103e-08
7806A3A12236118	XCR1	6	0.000227465	0.005964063
7995A3A13566528	ACE2	6	8.56437e-10	9.561705e-08
7806A3A12242969	CORD-19	6	4.80427e-12	5.938421e-10
7806A3A12242129	IFITM2	6	4.70409e-06	0.0001695922
383664A3A31263083	ACE2	6	3.1559e-11	3.766403e-09
7806A3A12237726	OAS3	6	3.00567e-05	0.0009722078
7806A3A12237104	LY6E	6	0.000307887	0.007835271
7806A3A12246062	LZTFL1	6	4.15264e-09	4.227143e-07
7806A3A12249593	TMPRSS13	5	8.42646e-05	0.002471524
6354A3A9090000	ACE2	5	2.05057e-09	2.150613e-07
1057396A3A36178562	ORF1ab	5	1.44968e-06	5.453633e-05
7806A3A12235488	DMT	5	0.00225644	0.0460484
7806A3A12255454	CLEC4G	5	1.69799e-06	6.319079e-05
228404A3A28619437	nucleoprotein	5	1.33388e-07	5.995531e-06
7806A3A12242116	IFI44	5	0.000728964	0.01716289
7806A3A12247391	SD1	5	0.000327852	0.008282451
7806A3A12244428	IGHV3-53	5	9.08997e-10	9.831371e-08
7806A3A12248486	FYCO1	5	5.37889e-06	0.000191921
7806A3A12259361	HNP1	4	0.000146565	0.003932259
7806A3A12245906	ORF9	4	0.000162398	0.004323534
7806A3A12246081	PARP14	4	0.0016058	0.03473546
7806A3A12241801	protein 14	4	0.00129505	0.02854884
7806A3A12252237	Nov 1	4	0.000238174	0.006197896
7806A3A12241222	MAS1	4	0.000146565	0.003932259
7806A3A12240439	HAT1	4	0.0022681	0.0460484
7806A3A12249115	LNP	4	0.000427591	0.01049569
7806A3A12243669	BTKi	4	0.00196494	0.04121611
8088A3A13517260	ACE2	4	1.19248e-08	1.049713e-06
7806A3A12234741	ChAd	4	0.00102898	0.0234296
7806A3A12264194	ab6	4	0.00102898	0.0234296
8164A3A13899780	TMPRSS4	4	0.00049704	0.01186383
7869A3A12519469	TMPRSS2	3	6.75128e-06	0.000236022
7685A3A11918981	transmembrane serine protease 2	3	6.75128e-06	0.000236022
7784A3A12475653	ACE2	3	1.87059e-05	0.0006285546
7806A3A12244555	TRBV11-2	3	1.36453e-06	5.306335e-05
7806A3A12242786	AP2-associated protein kinase 1	3	0.000117818	0.003342361
7806A3A12250302	RHOT2	3	0.000414994	0.01025924
7806A3A12258476	TMEM41B	3	0.000117818	0.003342361
7806A3A12247849	GRY	3	0.000305533	0.007832961
7806A3A12238820	SARS1	3	3.42929e-07	1.483597e-05
7806A3A12252054	ACTT-1	3	1.87059e-05	0.0006285546
7806A3A12254914	COX18	3	7.19599e-05	0.00212866
7806A3A12258124	APOBEC4	2	0.00100512	0.02319147
7909A3A13133881	TMPRSS2	2	0.000146296	0.003932259
7806A3A12252282	BEST3	2	0.00212392	0.04401729
7995A3A13566997	TMPRSS2	2	0.000291228	0.007521941
8893A3A14203282	ORF1ab	2	0.000146296	0.003932259
7806A3A12270901	miR-2392	2	0.00170707	0.03624644
8074A3A13749651	furin	2	0.000146296	0.003932259
5019A3A7064487	Mod-5	2	0.00212392	0.04401729
7680A3A11880891	ACE2	2	4.89941e-05	0.001487444
8164A3A13902336	PARP12	2	0.00170707	0.03624644
7806A3A12244770	IGLV3-19	2	0.000483118	0.01168804
7300A3A11131614	ACE2	2	0.00133393	0.02903605
7784A3A12475604	Furin	2	0.000146296	0.003932259
228404A3A28619429	spike glycoprotein	2	0.00170707	0.03624644
2782A3A4136832	COX2	2	4.89941e-05	0.001487444
1211222A3A37096598	ORF1ab	2	4.89941e-05	0.001487444
7806A3A12244411	IGHV3-66	2	0.00133393	0.02903605

## Sheet: Delirium_all_genes
Object id	Object label	Documents Number	Co-occurrence Score (p-value)	FDR
7806A3A12238809	S-100	38	7.69705e-08	1.402211e-05
7806A3A12235453	neuron-specific enolase	29	9.43191e-08	1.402211e-05
7806A3A12234314	butyrylcholinesterase	13	1.02215e-06	7.597982e-05
7806A3A12236708	interleukin -1beta	13	0.0312028	0.190841
7806A3A12247757	angiotensin-converting enzyme 2	8	0.00855172	0.1107076
7806A3A12289856	CYP2D6	8	0.00142783	0.03980076
7806A3A12236721	interleukin -6	8	0.165547	0.3927338
7806A3A12238860	monocyte chemotactic protein-1	7	0.0838882	0.2834404
7806A3A12236565	5-HT2A	7	7.39838e-05	0.003666308
7806A3A12236730	IL-1RA	6	0.0130882	0.1255882
7806A3A12241465	staring	5	5.62896e-06	0.0003138145
7806A3A12241878	Sigma-1 receptor	5	6.7275e-07	6.00093e-05
7806A3A12234128	amyloid precursor protein	4	0.727382	0.851476
7806A3A12235293	dopamine D2 receptor	4	0.0625924	0.2514974
7806A3A12234910	catechol-o-methyltransferase	4	0.0537405	0.2385858
7806A3A12239536	B12	4	0.0469781	0.2385858
7806A3A12254786	APACHE	4	8.84176e-05	0.00375862
7806A3A12234117	APOE4	4	0.0438401	0.2355745
7806A3A12240735	hPer2	4	0.000180477	0.006707728
7806A3A12236327	orexin	3	0.0227803	0.1665576
7806A3A12237403	melatonin receptor 1B	3	9.27014e-05	0.00375862
8164A3A13876537	monocyte chemotactic protein-1	3	0.549047	0.7196308
8164A3A13874589	LAMP1	3	0.0819426	0.2793758
7806A3A12236613	IFN-alpha	3	0.568851	0.7273238
7806A3A12247753	iceberg	3	0.0140236	0.1255882
8164A3A13875558	per2	3	0.0127541	0.1255882
7806A3A12234758	chitinase 3-like 1	3	0.0493246	0.2385858
7806A3A12235164	Penumbra	3	0.208238	0.4308587
7806A3A12234632	CD68	3	0.50387	0.6851403
7806A3A12236558	5-HT1A	3	0.114951	0.3417876
7806A3A12236187	NR2b	3	0.0158383	0.1343897
7806A3A12241232	BIS	3	0.00316028	0.0633479
7806A3A12236710	Interleukin-1 receptor antagonist	3	0.399278	0.609542
7806A3A12236159	GPT	3	0.0514246	0.2385858
7806A3A12236734	interleukin -10	3	0.55512	0.7215393
7806A3A12236399	HMGB1	3	0.220896	0.4477658
7806A3A12237044	LIF	3	0.0967365	0.3038344
7806A3A12239016	SLC6A3	3	0.0139422	0.1255882
7806A3A12243500	SLI	3	1.84095e-06	0.0001172948
7806A3A12285419	RBC	3	0.442258	0.6495424
7806A3A12234783	AChE	3	0.0179655	0.1430824
7806A3A12242547	ADAMTS 13	3	0.0772465	0.2756155
7806A3A12237812	plasminogen activator inhibitor type 1	3	0.460511	0.6582946
8157A3A13974604	CCL2	2	0.208667	0.4308587
7806A3A12236823	CD11b	2	0.699194	0.8360336
2245782A3A38933110	spike glycoprotein	2	0.0769057	0.2756155
7806A3A12239012	Norepinephrine transporter	2	0.0542575	0.2385858
7806A3A12234246	Proton pump	2	0.0693172	0.2670536
7806A3A12239771	PCT	2	0.087186	0.2880367
7806A3A12234971	corticotropin releasing hormone	2	0.649749	0.7992234
7806A3A12236768	IP-10	2	0.717109	0.8492417
7806A3A12233959	alpha1	2	0.295274	0.523296
7806A3A12238225	protein C	2	0.770552	0.8736427
7806A3A12234282	ADH	2	0.0457069	0.2376158
7806A3A12238383	cyclooxygenase -2	2	0.514066	0.6885088
7806A3A12237017	neutrophil gelatinase-associated lipocalin	2	0.561377	0.7215393
7806A3A12237651	NOS	2	0.334441	0.5586543
7806A3A12251785	OX2R	2	0.00720824	0.1037056
7806A3A12239729	UCHL1	2	0.148997	0.3767969
8164A3A13872282	choline acetyltransferase	2	0.123393	0.3468141
7806A3A12238228	AMPK	2	0.266218	0.5052478
7806A3A12239554	cTnI	2	0.650539	0.7992234
8157A3A13974448	interleukin -1beta	2	0.81504	0.9033444
7806A3A12245936	Triggering receptor expressed on myeloid cells 2	2	0.0365001	0.2084954
7806A3A12237170	microtubule-associated protein 2	2	0.0363794	0.2084954
7806A3A12236713	interleukin 2	2	0.957338	0.9684147
7806A3A12244231	alpha 2	2	0.348409	0.5703477
7806A3A12239780	vascular cell adhesion molecule-1	2	0.806001	0.89645
7806A3A12238894	Syndecan-1	2	0.295674	0.523296
8164A3A13872853	dopamine D2 receptor	2	0.141149	0.370849
7806A3A12237761	MOR	2	0.275445	0.5118686
7806A3A12237688	neurogranin	2	0.0068511	0.1037056
7806A3A12236482	haptoglobin	2	0.68424	0.8203523
7806A3A12234064	angiopoietin-2	2	0.274844	0.5118686
7806A3A12235565	thromboplastin	2	0.479414	0.6713513
8164A3A13874126	interleukin-1 beta	2	0.863667	0.9281819
7806A3A12236567	5-HT2c	2	0.0475606	0.2385858
7806A3A12250893	NLRP3	2	0.654073	0.7992234
7806A3A12234427	C5a	2	0.425257	0.6364585
7806A3A12234407	translocator protein	2	0.123213	0.3468141
8164A3A13873661	Abeta	2	0.703817	0.8393112
7806A3A12235091	CYP1A2	2	0.547952	0.7196308
7806A3A12238006	CPK	2	0.108328	0.3286686
7806A3A12250154	alb	2	0.0569386	0.2395718
7806A3A12238278	PRL	2	0.527195	0.7018775
7806A3A12236746	IL-15	2	0.559029	0.7215393
8164A3A13899999	NLRP3	2	0.569139	0.7273238
7806A3A12236409	HMOX1	2	0.397469	0.6091793
8164A3A13877405	TFEB	2	0.0295478	0.1882617
7806A3A12239056	VMAT2	2	0.0085883	0.1107076
7806A3A12248365	PRP	2	0.197607	0.4216877
7806A3A12237674	NT-proCNP	2	0.0556629	0.2385858
8164A3A13874124	IL-1RA	2	0.122314	0.3468141
7806A3A12239969	AFP	2	0.502231	0.6850001
7806A3A12235113	CYP3A	2	0.604567	0.7616861
7806A3A12239094	alpha synuclein	2	0.0543974	0.2385858
7806A3A12248050	PRN	2	0.00216874	0.0511508
7806A3A12236631	IFN-beta	2	0.872201	0.9326189
7806A3A12234295	zinc-alpha-2-glycoprotein	2	0.0162714	0.1343897
8164A3A13914134	tau phosphorylation	2	0.123393	0.3468141
7806A3A12234298	beta-2-microglobulin	1	0.488706	0.6748077
7806A3A12242942	Mon2	1	0.0337743	0.2008445
8164A3A13877617	TNFSF12	1	0.0905299	0.2941852
7806A3A12243907	IL36RN	1	0.0880466	0.2887411
7806A3A12239596	TR4	1	0.157844	0.3868045
7806A3A12247339	ARS	1	0.274737	0.5118686
8164A3A13892465	steroid 5-alpha-reductase 2	1	0.0140794	0.1255882
8157A3A13978442	rabphilin 3A	1	0.0226449	0.1665576
7806A3A12243176	DMN	1	0.246925	0.4788198
7806A3A12242130	NPC2	1	0.138331	0.3694349
7806A3A12255518	ADC	1	0.406296	0.6142645
8157A3A13974429	HTR1A	1	0.880814	0.9331189
7806A3A12243710	contactin-associated protein-2	1	0.197306	0.4216877
7806A3A12239683	SCs	1	0.508394	0.6871022
7806A3A12237994	neuroserpin	1	0.0541081	0.2385858
7806A3A12238886	CXCL5	1	0.318827	0.5406724
8157A3A13979398	NLRP3	1	0.4037	0.6124156
7806A3A12241757	AC1	1	0.0556544	0.2385858
7806A3A12241516	MAGI-2	1	0.0478976	0.2385858
7806A3A12234597	CD20 antigen	1	0.303804	0.5272241
8164A3A13873831	HMGB1	1	0.795257	0.8909062
8164A3A13877006	synaptophysin	1	0.541042	0.7139193
7806A3A12239330	tars	1	0.0167641	0.1359416
7806A3A12234770	CHRM2	1	0.0760318	0.2756155
7806A3A12237907	PECAM-1	1	0.950366	0.9655199
7806A3A12234767	M1 muscarinic acetylcholine receptor	1	0.0607905	0.2487391
8164A3A13873344	alpha6	1	0.29	0.52223
7806A3A12234009	protein kinase B	1	0.90951	0.9448251
7806A3A12237820	PCS	1	0.170154	0.3932056
7806A3A12252403	Mate II	1	0.0735089	0.2687293
7806A3A12245006	ASC	1	0.494252	0.6782658
7806A3A12234445	LDLRAD4	1	0.00543877	0.09702766
7806A3A12258261	miR-181c	1	0.0561693	0.2385858
7806A3A12237874	cGMP-inhibited 3',5'-cyclic phosphodiesterase A	1	0.0724978	0.2687293
8164A3A13871678	alb	1	0.0785479	0.2758454
7806A3A12235573	Fatty Acid-Binding Protein 3	1	0.375747	0.5880111
7806A3A12243381	CD2AP	1	0.14255	0.370849
7806A3A12243100	PLCB1	1	0.0949829	0.3004424
7806A3A12243888	AST	1	0.928935	0.9568245
8164A3A13875440	P2X7	1	0.386547	0.598611
8157A3A13987203	CD2AP	1	0.0530759	0.2385858
8157A3A13975202	SERT	1	0.12364	0.3468141
7806A3A12234523	caspase-1	1	0.82223	0.9033444
7806A3A12237283	MJD1	1	0.290388	0.52223
7806A3A12234408	Bruton tyrosine kinase	1	0.550211	0.7196308
7806A3A12249549	ORNT2	1	0.0369308	0.2084954
7806A3A12240698	neuropilin 1	1	0.395844	0.6087808
8157A3A13974359	dopamine D2 receptor	1	0.670393	0.8124872
7806A3A12243255	TDP-43	1	0.653054	0.7992234
7806A3A12251071	n-methyl-d-aspartate receptor 3A	1	0.0348276	0.204383
8157A3A13978985	CD11b	1	0.318456	0.5406724
7806A3A12238415	CD45	1	0.937416	0.9633353
7806A3A12240053	Mesencephalic Astrocyte-Derived Neurotrophic Factor	1	0.0618144	0.2506293
7806A3A12235899	GABRB2	1	0.0316642	0.190841
8164A3A13873004	neuron-specific enolase	1	0.238251	0.4697362
8164A3A13872797	postsynaptic density protein 95	1	0.507052	0.6871022
7806A3A12236219	GSTM1	1	0.721665	0.8492417
7806A3A12243358	LCP	1	0.0274303	0.1825957
7806A3A12237652	NPY	1	0.328418	0.5506557
7806A3A12237014	lipopolysaccharide binding protein	1	0.375066	0.5880111
7806A3A12235569	fatty acid amide hydrolase	1	0.239081	0.4697362
7806A3A12238041	alteplase	1	0.983419	0.9856289
7806A3A12235114	CYP3A5	1	0.604102	0.7616861
8164A3A13889389	Mesencephalic Astrocyte-Derived Neurotrophic Factor	1	0.0499722	0.2385858
7806A3A12241148	ABCG2	1	0.840166	0.9183445
7806A3A12244315	PCLO	1	0.0226449	0.1665576
8164A3A13891923	triggering receptor expressed on myeloid cells 2	1	0.221451	0.4477658
7806A3A12237271	macrophage migration inhibitory factor	1	0.594265	0.755106
7806A3A12238861	RANTES	1	0.928935	0.9568245
8157A3A13987205	Rev1	1	0.00272309	0.05783324
6354A3A9081130	GFAP	1	0.0374559	0.2088166
7806A3A12239531	transmembrane protease serine 2	1	0.432881	0.6423289
7806A3A12234249	DAR	1	0.181838	0.4075364
7806A3A12270293	PD-1	1	0.946134	0.9646868
7806A3A12247136	Resistin	1	0.76928	0.8736427
7806A3A12242440	beta 42	1	0.0780452	0.2758454
7806A3A12234936	CPB	1	0.16516	0.3927338
7806A3A12245932	triggering receptor expressed on myeloid cells-1	1	0.256312	0.4927377
7806A3A12236505	histamine H2 receptor	1	0.159679	0.389163
7806A3A12249603	dysbindin	1	0.122205	0.3468141
7806A3A12236652	IGF1	1	0.910248	0.9448251
7806A3A12242717	ECD	1	0.144419	0.371625
5812A3A8101681	CD2AP	1	0.00652297	0.1037056
7806A3A12233852	alpha-1 antichymotrypsin	1	0.498099	0.6814483
7806A3A12247777	Histamine H4 receptor	1	0.13645	0.3666066
7806A3A12235471	ETK	1	0.0795524	0.2771904
7806A3A12237921	hPer1	1	0.199492	0.423683
7806A3A12236566	5-HT2B	1	0.16516	0.3927338
8164A3A13876542	RANTES	1	0.76928	0.8736427
7806A3A12242369	fibrinogen-like protein 2	1	0.0704723	0.2679208
7806A3A12237449	methylmalonyl-CoA mutase	1	0.161053	0.3903785
8164A3A13881136	Clec7a	1	0.317712	0.5406724
8164A3A13875420	sigma-1 receptor	1	0.16698	0.3932056
7806A3A12239783	POR	1	0.140678	0.370849
7806A3A12236593	intercellular adhesion molecule -1	1	0.858007	0.9265645
7806A3A12250217	unkempt	1	0.0290201	0.1875792
7806A3A12237672	ANP	1	0.47543	0.6713513
7806A3A12238122	proopiomelanocortin	1	0.645981	0.7992234
8164A3A13875193	beta2	1	0.608397	0.7622052
7806A3A12239688	Tyrobp	1	0.126979	0.353954
7806A3A12234062	amphiphysin	1	0.0870514	0.2880367
7806A3A12235450	alpha-enolase	1	0.400439	0.609542
7806A3A12236654	IGF-II	1	0.885404	0.9343342
7806A3A12248801	NANOG	1	0.775976	0.8761653
6354A3A9088970	S100B	1	0.00272309	0.05783324
7806A3A12236714	IL1R1	1	0.221875	0.4477658
8164A3A13873334	GABAA	1	0.614962	0.7682719
7806A3A12234769	CHRM4	1	0.0316642	0.190841
8157A3A13977126	RANTES	1	0.276712	0.5120894
7806A3A12255702	V-set and transmembrane domain-containing protein 2B	1	0.00217907	0.0511508
8164A3A13876557	MIP-2	1	0.822327	0.9033444
8157A3A13974706	DAT	1	0.180051	0.4055694
7806A3A12237700	Neurotrophic Receptor Tyrosine Kinase1	1	0.946892	0.9646868
7806A3A12243848	fibroblast growth factor -21	1	0.451438	0.6495424
8157A3A13975237	microtubule-associated protein 2	1	0.362675	0.5800381
7806A3A12240631	TNFSF12	1	0.152314	0.3795086
7806A3A12237660	NOTCH3	1	0.53398	0.7066916
7806A3A12238863	monocyte chemotactic protein-3	1	0.344342	0.568802
7806A3A12240679	PEX11beta	1	0.0119263	0.1255882
7806A3A12238448	paxillin	1	0.318084	0.5406724
8157A3A13977721	MIP-2	1	0.385543	0.598611
7806A3A12234603	T1-4	1	0.451737	0.6495424
7806A3A12241968	beta2	1	0.666596	0.8100867
7806A3A12250717	CA-125	1	0.974024	0.9806201
7806A3A12238744	S6K	1	0.325482	0.5498673
7806A3A12244190	PLT	1	0.35884	0.5777713
7806A3A12238862	macrophage inflammatory protein 1 alpha	1	0.720752	0.8492417
8164A3A13879419	MAGI-2	1	0.0253063	0.1763533
7806A3A12253136	MT2	1	0.262774	0.5029923
7806A3A12234132	TNFSF6	1	0.892956	0.9392886
8164A3A13892477	dysbindin	1	0.0633481	0.2522612
7806A3A12237288	mixed-lineage kinase 3	1	0.0541081	0.2385858
7806A3A12237969	PHC	1	0.0215783	0.1665576
8157A3A13974956	aquaporin-4	1	0.430712	0.6423289
7806A3A12240791	wave 1	1	0.35463	0.5741991
8164A3A13873339	GABRB2	1	0.010848	0.1255882
7806A3A12238040	uPAR	1	0.293091	0.5228743
7806A3A12234865	contactin-1	1	0.0714856	0.2679208
7806A3A12236967	CK7	1	0.818804	0.9033444
7806A3A12236878	inward rectifier potassium channel 2	1	0.205581	0.4284539
7806A3A12235546	EZH2	1	0.754345	0.8693485
7806A3A12233973	alpha-2A adrenergic receptor	1	0.164249	0.3927338
7806A3A12233841	ASAT	1	0.169701	0.3932056
7806A3A12235520	ETFA	1	0.0587395	0.2425724
7806A3A12235594	fibulin-1	1	0.0994141	0.3079076
8347A3A14196213	LMP-1	1	0.149536	0.3767969
7806A3A12236408	HMOX2	1	0.122683	0.3468141
7806A3A12239584	thyroid peroxidase	1	0.649822	0.7992234
7806A3A12238953	Sex Hormone Binding Globulin	1	0.90716	0.9448251
8157A3A13992553	macrophage scavenger receptor-1	1	0.00217907	0.0511508
7806A3A12255536	sting	1	0.374384	0.5880111
7806A3A12236312	hemoglobin-beta	1	0.918552	0.9505202
7806A3A12235669	FKBP5	1	0.191154	0.4138577
7806A3A12242351	HPA	1	0.676095	0.8149686
7806A3A12236603	CFI	1	0.36441	0.5800381
7806A3A12239063	organic cation transporter-2	1	0.279075	0.5143283
7806A3A12248028	PSS 3	1	0.00868782	0.1107076
7806A3A12237168	monoamine oxidase B	1	0.560157	0.7215393
7806A3A12239607	TRH	1	0.790284	0.8900673
7806A3A12237413	methionine synthase	1	0.348619	0.5703477
7806A3A12248145	P2ry12	1	0.799019	0.8909062
8164A3A13874018	IP-10	1	0.721513	0.8492417
8164A3A13874119	IL1R1	1	0.167888	0.3932056
7806A3A12254239	NPC1	1	0.223571	0.4491562
7806A3A12235902	GABRA6	1	0.0130034	0.1255882
8157A3A13974898	M1 muscarinic acetylcholine receptor	1	0.0484166	0.2385858
7806A3A12234700	S protein	1	0.414655	0.6226806
7806A3A12242837	rabphilin 3A	1	0.0135415	0.1255882
7806A3A12236212	glycogen synthase kinase 3beta	1	0.665138	0.8100867
7806A3A12233994	aHR	1	0.510534	0.6876286
7806A3A12241092	KLOTHO	1	0.488148	0.6748077
7806A3A12235081	Cx3cr1	1	0.344342	0.568802
7806A3A12239667	titin	1	0.364064	0.5800381
7806A3A12239252	syntaxin 1a	1	0.336066	0.559274
8164A3A13873183	fibrinogen alpha	1	0.0421687	0.2293566
7806A3A12242066	Gr 3	1	0.119328	0.3468141
8164A3A13872171	CD2AP	1	0.0820588	0.2793758
7806A3A12237561	NFL	1	0.481404	0.6713513
7806A3A12237964	ABCB1	1	0.91093	0.9448251
8157A3A13976869	AMPK	1	0.492041	0.6773157
7806A3A12236533	HSPA8	1	0.264781	0.5046681
8164A3A13871771	amyloid precursor protein	1	0.900229	0.9447109
8164A3A13875925	CD45	1	0.744367	0.8631175
8164A3A13873270	cFOS	1	0.282996	0.5151682
7806A3A12234862	CB2	1	0.480555	0.6713513
7806A3A12237757	kappa opioid receptor	1	0.282214	0.5151682
7806A3A12237008	LAMP1	1	0.485629	0.6747369
7806A3A12253166	KBTBD12	1	0.00109013	0.0324132
7806A3A12245618	Rev1	1	0.0850576	0.2852307
7806A3A12237522	neural cell adhesion molecule-2	1	0.0113873	0.1255882
8164A3A13871659	ionized calcium-binding adapter molecule 1	1	0.134092	0.3646648
7806A3A12238313	CEA	1	0.957558	0.9684147
7806A3A12235863	gastrin	1	0.908916	0.9448251
7806A3A12235236	postsynaptic density protein 95	1	0.303044	0.5272241
7806A3A12238823	SAA	1	0.390216	0.6022019
8164A3A13872015	translocator protein	1	0.269975	0.5080542
8157A3A13978804	IP-10	1	0.176016	0.4025802
8164A3A13873736	C5a	1	0.442997	0.6495424
7806A3A12236274	granzyme B	1	0.819396	0.9033444
8157A3A13975046	TNFSF6	1	0.4335	0.6423289
7806A3A12237362	macrophage scavenger receptor-1	1	0.169701	0.3932056
7806A3A12240865	synaptotagmin 7	1	0.0156911	0.1343897
8157A3A13974549	proopiomelanocortin	1	0.60797	0.7622052
7806A3A12235705	Fms-like tyrosine kinase-3	1	0.735431	0.8574088
8164A3A13871941	Bdnf	1	0.745202	0.8631175
7806A3A12238889	CX3CL1	1	0.44994	0.6495424
7806A3A12259210	BDNF	1	0.736295	0.8574088
8157A3A13976690	steroid 5-alpha-reductase 2	1	0.0113873	0.1255882
7806A3A12234763	chromogranin A	1	0.878251	0.9326189
7806A3A12242516	I-beta-1,3-N-acetylglucosaminyltransferase	1	0.010848	0.1255882
8157A3A13975427	HMGB1	1	0.218899	0.4477658
7806A3A12238321	PS 3-4	1	0.00706462	0.1037056
7806A3A12243140	KIBRA	1	0.0556544	0.2385858
7806A3A12238797	RyR2	1	0.243632	0.476104
8164A3A13884627	ASC	1	0.470833	0.6708994
8164A3A13876525	macrophage scavenger receptor-1	1	0.188946	0.4130878
8164A3A13881392	Sall1	1	0.0541081	0.2385858
7806A3A12236756	Interleukin 18	1	0.771783	0.8736427
8164A3A13875898	cyclooxygenase -1	1	0.624297	0.7777555
8164A3A13872378	CB2	1	0.448137	0.6495424
8164A3A13876725	Norepinephrine transporter	1	0.132674	0.3646648
7806A3A12249898	tau-tubulin kinase 1	1	0.0135415	0.1255882
7806A3A12241151	dine	1	0.0263689	0.1809312
7806A3A12240090	TFEB	1	0.202542	0.4259237
7806A3A12234960	corticotropin-releasing hormone receptor 1	1	0.298468	0.5261531
8157A3A13975045	annexin A1	1	0.154623	0.3810047
7818A3A12300606	CD2AP	1	0.00326682	0.0633479
8164A3A13872097	caspase-1	1	0.875226	0.9326189
7806A3A12270105	most 1	1	0.0406003	0.2235523
8164A3A13874676	annexin A1	1	0.228636	0.4552306
7806A3A12239796	visinin-like protein 1	1	0.0510079	0.2385858
7806A3A12238216	PMS	1	0.0989228	0.3079076
7806A3A12251498	mater	1	0.310229	0.5362873
7806A3A12239181	SCN	1	0.18362	0.4094726
8164A3A13872451	corticotropin-releasing hormone	1	0.553876	0.7215393
8157A3A13975314	IL1R1	1	0.0268997	0.1817768
7806A3A12237454	Mxa	1	0.36545	0.5800381
7818A3A12301003	fibrinogen alpha	1	0.00760598	0.1060083
7806A3A12237640	NQO2	1	0.0458183	0.2376158
8164A3A13872454	corticotropin-releasing hormone receptor 1	1	0.191154	0.4138577
7806A3A12235157	dopamine beta-hydroxylase	1	0.287285	0.52085
7806A3A12247585	POSH	1	0.00543877	0.09702766
7806A3A12238619	ECP	1	0.716764	0.8492417
7806A3A12235438	elF4	1	0.0226449	0.1665576
7806A3A12234114	apolipoprotein A1	1	0.972895	0.9806201
7806A3A12239180	steroid 5-alpha-reductase 2	1	0.188061	0.4130878
8164A3A13877757	Tyrobp	1	0.145351	0.371625
8164A3A13878091	beta-site of amyloid precursor protein cleaving enzyme 1	1	0.412417	0.6214121
8347A3A14196256	EBNA-2	1	0.111125	0.3348767
7806A3A12240229	BIS-1	1	0.0447771	0.2376158
7806A3A12251219	large type II	1	0.0247747	0.1753891
7806A3A12236572	5-HT6	1	0.102356	0.3148329
7818A3A12314298	rabphilin 3A	1	0.000545212	0.0173689
7806A3A12236179	progranulin	1	0.451438	0.6495424
7818A3A12306063	macrophage scavenger receptor-1	1	0.000545212	0.0173689
8164A3A13887649	NANOG	1	0.747003	0.8631175
7806A3A12235111	cytochrome P450 2D6	1	0.442997	0.6495424
8164A3A13873143	TNFSF6	1	0.825019	0.9040749
7806A3A12235031	PSS 4	1	0.134092	0.3646648
7806A3A12238807	S100A12	1	0.478283	0.6713513
8164A3A13886969	P2ry12	1	0.152314	0.3795086
7806A3A12237677	BNP	1	0.652106	0.7992234
7806A3A12235105	CYP2C19	1	0.861978	0.9281819
7806A3A12237457	MPD	1	0.112094	0.3355297
7806A3A12252202	bit	1	0.244457	0.476104
7806A3A12235024	CSPG4	1	0.0910259	0.2941852
7806A3A12238149	cyclophilin A	1	0.355334	0.5741991
8164A3A13875047	microtubule-associated protein 2	1	0.143018	0.370849
7806A3A12235606	CD16	1	0.842159	0.9183445
7806A3A12235564	coagulation factor V	1	0.230316	0.4565375
8164A3A13875556	Per1	1	0.302284	0.5272241
7806A3A12234598	CD19	1	0.877985	0.9326189
7806A3A12238368	BZs	1	0.675742	0.8149686
7806A3A12248981	MIP2	1	0.0306076	0.190841
7806A3A12241156	PERK	1	0.446026	0.6495424
8157A3A13975372	orexin	1	0.511867	0.6876286
7806A3A12237779	ornithine transcarbamylase	1	0.30076	0.5272241
7806A3A12245614	DF 2	1	0.0820588	0.2793758
7806A3A12240143	FGF-23	1	0.79548	0.8909062
7806A3A12235632	fibrinogen alpha	1	0.280254	0.5143757
7806A3A12258225	miR-146a	1	0.531942	0.7060897
8164A3A13872965	eIF2alpha	1	0.327685	0.5506557
7806A3A12238494	RAGE	1	0.350393	0.5703477
7806A3A12236184	GRIK3	1	0.0237103	0.1705612
8164A3A13879456	mug	1	0.769657	0.8736427
8164A3A13872563	Cx3cr1	1	0.314355	0.5406724
7806A3A12237876	programmed cell death 1	1	0.87468	0.9326189
7806A3A12239122	SOAT-1	1	0.142083	0.370849
7806A3A12235376	STN	1	0.154162	0.3810047
7806A3A12236785	IRR	1	0.13645	0.3666066
7806A3A12236716	IL-3	1	0.943331	0.9646868
8164A3A13881139	glycogen synthase kinase 3beta	1	0.855192	0.9257661
7806A3A12240484	KMO	1	0.0674257	0.2637883
8164A3A13871845	activating transcription factor 3	1	0.293091	0.5228743
7806A3A12237033	galectin-3 binding protein	1	0.212483	0.4367162
8164A3A13894450	tau-tubulin kinase 1	1	0.00598101	0.09879742
7806A3A12235734	formyl peptide receptor 2	1	0.194676	0.4194468
8164A3A13877603	TNFalpha	1	0.981172	0.9855917
7806A3A12243579	Nepro	1	0.00598101	0.09879742
8157A3A13987569	TNFSF12	1	0.0119263	0.1255882
7806A3A12235323	DUSP4	1	0.0925118	0.2962925
7806A3A12244233	BBS9	1	0.593601	0.755106
7806A3A12239304	synaptophysin	1	0.886151	0.9343342
8164A3A13872208	Cd68	1	0.481687	0.6713513
7806A3A12236188	NR2a	1	0.269975	0.5080542
8164A3A13876287	NF-kappaB p65	1	0.769657	0.8736427
7806A3A12239432	TIE2	1	0.452932	0.6495424
8164A3A13873340	gamma2	1	0.203412	0.4259237
7806A3A12239017	SERT	1	0.604534	0.7616861
8164A3A13872180	CD39	1	0.200801	0.4244419
7806A3A12236052	glutamine synthetase	1	0.374725	0.5880111
7806A3A12239039	SLC12A1	1	0.0930066	0.2962925
7806A3A12248065	Clec7a	1	0.249385	0.4814966
8164A3A13873968	5-HT1A	1	0.523701	0.6993133
7806A3A12241661	CAF	1	0.145817	0.371625
7806A3A12234112	apolipoprotein B	1	0.994122	0.994122
7806A3A12239290	synapsin I	1	0.178708	0.4055694
8164A3A13878298	mixed-lineage kinase 3	1	0.0664079	0.2621055
7806A3A12238812	Sall1	1	0.12364	0.3468141
7806A3A12253590	C9ORF72	1	0.474285	0.6713513
8164A3A13874030	interferon-beta	1	0.853923	0.9257661
7806A3A12239422	Cripto	1	0.0714856	0.2679208
7806A3A12235900	GABRG2	1	0.0735089	0.2687293
7806A3A12239478	Thrombomodulin	1	0.763547	0.8736427
7806A3A12236093	LHRH	1	0.558715	0.7215393
7806A3A12250801	ml -1	1	0.947383	0.9646868
7806A3A12243389	beta-secretase 1	1	0.379819	0.5923052
8157A3A13974797	SLC12A1	1	0.0577122	0.2405574
8157A3A13974267	protein kinase B	1	0.678559	0.815734
7806A3A12250901	BIC	1	0.0694579	0.2670536
8164A3A13876402	rabphilin 3A	1	0.0162278	0.1343897
7806A3A12240977	leucine-rich glioma-inactivated protein 1	1	0.185399	0.4113829
8157A3A13988417	fibrinogen alpha	1	0.0119263	0.1255882
7806A3A12234544	Cbl C	1	0.349684	0.5703477
7806A3A12247888	steep	1	0.724234	0.850022
8164A3A13874317	CD11b	1	0.852481	0.9257661
7806A3A12260056	MT1	1	0.226107	0.452214
7806A3A12248286	DSP-4	1	0.0279605	0.183388
8157A3A13976007	amyloid precursor protein	1	0.798909	0.8909062
7806A3A12241778	SLC25A13	1	0.105777	0.323127
8164A3A13883927	TRPV4	1	0.186731	0.4122873

## Sheet: Delirium_significant_genes
Object id	Object label	Documents Number	Co-occurrence Score	FDR (<0.05)
7806A3A12247757	angiotensin-converting enzyme 2	2587	0	0
7806A3A12239531	TMPRSS2	522	0	0
2245782A3A38933122	Nucleoprotein	513	3.56138e-08	2.490122e-06
2245782A3A38933110	spike glycoprotein	485	6.23809e-08	3.187754e-06
7806A3A12234700	S protein	344	0	0
8164A3A13886575	angiotensin-converting enzyme 2	332	4.09404e-08	2.642691e-06
2245782A3A38933113	orf1ab	183	0	0
7806A3A12236721	IL6	169	4.12324e-08	2.642691e-06
7806A3A12237799	furin	156	0	0
7806A3A12236768	c-x-c motif chemokine ligand 10	130	1.46594e-08	1.208004e-06
7806A3A12236710	interleukin-1 receptor antagonist	116	4.63945e-08	2.817041e-06
7806A3A12236730	interleukin-6 receptor	107	1.78172e-08	1.434077e-06
7806A3A12243888	AST	106	3.61518e-08	2.490122e-06
2245782A3A38933108	orf8	100	0	0
2245782A3A38933117	ORF3a	98	0	0
7806A3A12236631	interferon beta	96	3.1201e-08	2.347536e-06
7806A3A12235286	DPP4	95	4.45569e-08	2.773324e-06
7806A3A12235164	ACE1	79	0	0
7806A3A12239554	cTnI	73	0	0
7806A3A12250893	NLRP3	67	5.33788e-08	2.979742e-06
7806A3A12234398	CD147	67	0	0
8164A3A13879363	TMPRSS2	65	0	0
7806A3A12235065	cathepsin L	63	0	0
7806A3A12239800	S-protein	51	3.66935e-08	2.490122e-06
7806A3A12240698	NRP1	51	0	0
7806A3A12239771	PCT	49	1.07862e-08	9.823957e-07
7806A3A12236722	IL8	47	0.000834126	0.01937524
7806A3A12237928	PF4	47	0	0
7806A3A12242547	ADAMTS13	47	5.94499e-08	3.187754e-06
7806A3A12241676	nsp3	44	0	0
7806A3A12239298	ADAM17	43	1.3267e-08	1.119929e-06
2245782A3A38933106	ORF7a	41	7.27496e-08	3.546287e-06
7806A3A12235061	Cathepsin B	39	2.14502e-06	7.897781e-05
7806A3A12245501	Toll-like receptor 7	37	0	0
7806A3A12238287	protein S	37	0.00108596	0.02440589
2245782A3A38933121	Non-Structural Protein 6	37	4.02183e-08	2.642691e-06
8157A3A13983658	angiotensin-converting enzyme 2	37	0	0
7869A3A12505299	ACE2	36	4.38705e-09	4.338166e-07
7806A3A12247888	steep	36	2.11924e-05	0.0007052586
7806A3A12253120	helicase	35	7.99444e-08	3.790241e-06
7806A3A12237677	BNP	32	1.27432e-05	0.0004366754
7806A3A12239797	ARB	31	9.04273e-07	3.597344e-05
7806A3A12293628	IL-7	29	0.000810569	0.01895527
2245782A3A38933109	ORF7b	28	0	0
2245782A3A38933105	ORF 10	27	5.25484e-08	2.979742e-06
7806A3A12233993	angiotensin II type 1 receptor	26	0.000457418	0.01114876
7806A3A12240791	Wave 1	25	0	0
7806A3A12243361	RIG-1	23	0	0
7806A3A12241990	IFITM3	21	2.72023e-08	2.092159e-06
7806A3A12237454	MX1	20	3.13209e-06	0.000114107
7806A3A12236789	IRF3	20	1.42265e-06	5.41076e-05
7806A3A12250591	SPECC1	20	6.26314e-08	3.187754e-06
7806A3A12247753	iceberg	19	3.51387e-05	0.001115734
7818A3A12304813	ACE2	19	9.30206e-08	4.236109e-06
2245782A3A38933114	membrane glycoprotein	19	0	0
7806A3A12241674	nsp1	18	6.87433e-09	6.608904e-07
7806A3A12237173	Mas	18	3.59552e-08	2.490122e-06
8164A3A13875504	furin	18	4.86974e-05	0.001487444
7806A3A12236630	IFNAR2	17	6.07189e-08	3.187754e-06
7806A3A12246259	SARS	17	0	0
7806A3A12245144	CD209	16	3.40378e-05	0.001090785
7806A3A12240466	APOL 1	16	5.17813e-07	2.133513e-05
7806A3A12241921	CD209L	16	4.48732e-08	2.773324e-06
7685A3A11917334	angiotensin-converting enzyme-2	16	0	0
7806A3A12254396	interferon-lambda1	15	3.71355e-07	1.576874e-05
7806A3A12238863	MCP-3	15	0.000486298	0.01168804
7806A3A12238823	SAA	15	0.00228845	0.0460484
7806A3A12241309	ubiquitin-like ISG15 protein	15	1.05852e-06	4.163111e-05
7806A3A12242653	eta2	14	0.000179988	0.004755255
7943A3A13191790	ACE2	14	7.65321e-08	3.678856e-06
7806A3A12234002	AGTR2	14	1.78518e-07	7.921164e-06
7806A3A12247113	TMPRSS4	14	0	0
7806A3A12247972	IFIH1	14	6.00399e-05	0.00180694
7806A3A12234308	bat	14	3.32967e-08	2.451912e-06
7806A3A12240356	NSP2	13	6.19089e-08	3.187754e-06
7806A3A12247487	MAVS	12	1.04722e-05	0.0003624428
7806A3A12248956	NTD	12	6.02894e-08	3.187754e-06
8011A3A13370106	angiotensin-converting enzyme 2	12	0	0
7806A3A12237734	2'-5'-oligoadenylate synthetase 1	12	4.22284e-07	1.760873e-05
7806A3A12247183	FDP	12	3.81143e-05	0.001199214
7806A3A12241878	sigma-1 receptor	12	8.87466e-07	3.571535e-05
7806A3A12246105	SLC6A20	11	4.81636e-08	2.873005e-06
8164A3A13887983	STING	11	0.00120444	0.02689398
7806A3A12233922	ADAR-1	11	0.000333723	0.008369676
7806A3A12250484	radical s-adenosyl methionine domain containing 2	10	7.48678e-07	3.048441e-05
7806A3A12236616	IFIT1	10	0.00228471	0.0460484
7806A3A12239085	CD169	9	2.18067e-05	0.0007187904
7806A3A12246573	SAPS 3	9	3.73602e-07	1.576874e-05
7806A3A12242202	CXCR6	9	0.000345642	0.008606237
8074A3A13744118	ACE2	9	0	0
7806A3A12255537	B0AT1	9	8.59313e-08	4.01903e-06
7806A3A12236635	IFNAR1	9	0.00225275	0.0460484
7806A3A12241960	interferon regulatory factor 9	8	8.71352e-05	0.002513124
7806A3A12235458	ENPEP	8	0.00183846	0.03879823
7806A3A12238328	MHC-iota	8	0.00126983	0.02817232
7806A3A12240444	IFITM1	8	6.76946e-05	0.00201975
7806A3A12246668	HR1	8	1.38401e-06	5.322287e-05
7806A3A12251957	ORF3	8	0.000122571	0.003448929
7806A3A12247883	muted	8	0.000550712	0.01305489
8164A3A13903565	K18	7	8.55441e-05	0.002487967
8918A3A14203275	nucleoprotein	7	6.49066e-08	3.255677e-06
7806A3A12237722	OAS2	7	2.59512e-05	0.0008473312
8157A3A13978311	TMPRSS2	6	5.29009e-10	6.103e-08
7806A3A12236118	XCR1	6	0.000227465	0.005964063
7995A3A13566528	ACE2	6	8.56437e-10	9.561705e-08
7806A3A12242969	CORD-19	6	4.80427e-12	5.938421e-10
7806A3A12242129	IFITM2	6	4.70409e-06	0.0001695922
383664A3A31263083	ACE2	6	3.1559e-11	3.766403e-09
7806A3A12237726	OAS3	6	3.00567e-05	0.0009722078
7806A3A12237104	LY6E	6	0.000307887	0.007835271
7806A3A12246062	LZTFL1	6	4.15264e-09	4.227143e-07
7806A3A12249593	TMPRSS13	5	8.42646e-05	0.002471524
6354A3A9090000	ACE2	5	2.05057e-09	2.150613e-07
1057396A3A36178562	ORF1ab	5	1.44968e-06	5.453633e-05
7806A3A12235488	DMT	5	0.00225644	0.0460484
7806A3A12255454	CLEC4G	5	1.69799e-06	6.319079e-05
228404A3A28619437	nucleoprotein	5	1.33388e-07	5.995531e-06
7806A3A12242116	IFI44	5	0.000728964	0.01716289
7806A3A12247391	SD1	5	0.000327852	0.008282451
7806A3A12244428	IGHV3-53	5	9.08997e-10	9.831371e-08
7806A3A12248486	FYCO1	5	5.37889e-06	0.000191921
7806A3A12259361	HNP1	4	0.000146565	0.003932259
7806A3A12245906	ORF9	4	0.000162398	0.004323534
7806A3A12246081	PARP14	4	0.0016058	0.03473546
7806A3A12241801	protein 14	4	0.00129505	0.02854884
7806A3A12252237	Nov 1	4	0.000238174	0.006197896
7806A3A12241222	MAS1	4	0.000146565	0.003932259
7806A3A12240439	HAT1	4	0.0022681	0.0460484
7806A3A12249115	LNP	4	0.000427591	0.01049569
7806A3A12243669	BTKi	4	0.00196494	0.04121611
8088A3A13517260	ACE2	4	1.19248e-08	1.049713e-06
7806A3A12234741	ChAd	4	0.00102898	0.0234296
7806A3A12264194	ab6	4	0.00102898	0.0234296
8164A3A13899780	TMPRSS4	4	0.00049704	0.01186383
7869A3A12519469	TMPRSS2	3	6.75128e-06	0.000236022
7685A3A11918981	transmembrane serine protease 2	3	6.75128e-06	0.000236022
7784A3A12475653	ACE2	3	1.87059e-05	0.0006285546
7806A3A12244555	TRBV11-2	3	1.36453e-06	5.306335e-05
7806A3A12242786	AP2-associated protein kinase 1	3	0.000117818	0.003342361
7806A3A12250302	RHOT2	3	0.000414994	0.01025924
7806A3A12258476	TMEM41B	3	0.000117818	0.003342361
7806A3A12247849	GRY	3	0.000305533	0.007832961
7806A3A12238820	SARS1	3	3.42929e-07	1.483597e-05
7806A3A12252054	ACTT-1	3	1.87059e-05	0.0006285546
7806A3A12254914	COX18	3	7.19599e-05	0.00212866
7806A3A12258124	APOBEC4	2	0.00100512	0.02319147
7909A3A13133881	TMPRSS2	2	0.000146296	0.003932259
7806A3A12252282	BEST3	2	0.00212392	0.04401729
7995A3A13566997	TMPRSS2	2	0.000291228	0.007521941
8893A3A14203282	ORF1ab	2	0.000146296	0.003932259
7806A3A12270901	miR-2392	2	0.00170707	0.03624644
8074A3A13749651	furin	2	0.000146296	0.003932259
5019A3A7064487	Mod-5	2	0.00212392	0.04401729
7680A3A11880891	ACE2	2	4.89941e-05	0.001487444
8164A3A13902336	PARP12	2	0.00170707	0.03624644
7806A3A12244770	IGLV3-19	2	0.000483118	0.01168804
7300A3A11131614	ACE2	2	0.00133393	0.02903605
7784A3A12475604	Furin	2	0.000146296	0.003932259
228404A3A28619429	spike glycoprotein	2	0.00170707	0.03624644
2782A3A4136832	COX2	2	4.89941e-05	0.001487444
1211222A3A37096598	ORF1ab	2	4.89941e-05	0.001487444
7806A3A12244411	IGHV3-66	2	0.00133393	0.02903605

## Sheet: Delirium_COVID_cross_genes
Object id	Object label	Delirium Documents Number	Delirium Co-occurrence Score	Delirium FDR (<0.05)	COVID-19 Documents Number	COVID-19 Co-occurrence Score	COVID-19 FDR (<0.05)
7806A3A12238809	S-100	38	7.69705e-08	1.402211e-05	9	1	1
7806A3A12235453	neuron-specific enolase	29	9.43191e-08	1.402211e-05	2	1	1
7806A3A12234314	butyrylcholinesterase	13	1.02215e-06	7.597982e-05	7	1	1
7806A3A12236708	interleukin -1beta	13	0.0312028	0.190841	54	0.999993	1
7806A3A12247757	angiotensin-converting enzyme 2	8	0.00855172	0.1107076	2587	0	0
7806A3A12289856	CYP2D6	8	0.00142783	0.03980076	9	0.99998	1
7806A3A12236721	interleukin -6	8	0.165547	0.3927338	169	4.12324e-08	2.642691e-06
7806A3A12238860	monocyte chemotactic protein-1	7	0.0838882	0.2834404	63	0.0197978	0.1768859
7806A3A12236565	5-HT2A	7	7.39838e-05	0.003666308	2	0.999956	1
7806A3A12236730	IL-1RA	6	0.0130882	0.1255882	107	1.78172e-08	1.434077e-06
7806A3A12241465	staring	5	5.62896e-06	0.0003138145	6	0.0937024	0.4951206
7806A3A12241878	Sigma-1 receptor	5	6.7275e-07	6.00093e-05	12	8.87466e-07	3.571535e-05
7806A3A12234128	amyloid precursor protein	4	0.727382	0.851476	6	1	1
7806A3A12235293	dopamine D2 receptor	4	0.0625924	0.2514974	1	1	1
7806A3A12239536	B12	4	0.0469781	0.2385858	10	0.976619	1
7806A3A12254786	APACHE	4	8.84176e-05	0.00375862	4	0.32824	0.9482793
7806A3A12234117	APOE4	4	0.0438401	0.2355745	5	0.99979	1
8164A3A13876537	monocyte chemotactic protein-1	3	0.549047	0.7196308	8	1	1
8164A3A13874589	LAMP1	3	0.0819426	0.2793758	1	0.999998	1
7806A3A12236613	IFN-alpha	3	0.568851	0.7273238	40	0.397442	1
7806A3A12247753	iceberg	3	0.0140236	0.1255882	19	3.51387e-05	0.001115734
7806A3A12234758	chitinase 3-like 1	3	0.0493246	0.2385858	8	0.818051	1
7806A3A12235164	Penumbra	3	0.208238	0.4308587	79	0	0
7806A3A12234632	CD68	3	0.50387	0.6851403	16	0.99985	1
7806A3A12241232	BIS	3	0.00316028	0.0633479	1	0.975147	1
7806A3A12236710	Interleukin-1 receptor antagonist	3	0.399278	0.609542	116	4.63945e-08	2.817041e-06
7806A3A12236159	GPT	3	0.0514246	0.2385858	6	0.953717	1
7806A3A12236734	interleukin -10	3	0.55512	0.7215393	31	0.869472	1
7806A3A12236399	HMGB1	3	0.220896	0.4477658	25	0.201117	0.7622682
7806A3A12237044	LIF	3	0.0967365	0.3038344	2	0.999987	1
7806A3A12285419	RBC	3	0.442258	0.6495424	22	0.967774	1
7806A3A12234783	AChE	3	0.0179655	0.1430824	1	0.999104	1
7806A3A12242547	ADAMTS 13	3	0.0772465	0.2756155	47	5.94499e-08	3.187754e-06
7806A3A12237812	plasminogen activator inhibitor type 1	3	0.460511	0.6582946	24	0.945694	1
8157A3A13974604	CCL2	2	0.208667	0.4308587	2	0.999786	1
7806A3A12236823	CD11b	2	0.699194	0.8360336	12	0.999973	1
2245782A3A38933110	spike glycoprotein	2	0.0769057	0.2756155	485	6.23809e-08	3.187754e-06
7806A3A12234246	Proton pump	2	0.0693172	0.2670536	2	0.973828	1
7806A3A12239771	PCT	2	0.087186	0.2880367	49	1.07862e-08	9.823957e-07
7806A3A12234971	corticotropin releasing hormone	2	0.649749	0.7992234	1	1	1
7806A3A12236768	IP-10	2	0.717109	0.8492417	130	1.46594e-08	1.208004e-06
7806A3A12233959	alpha1	2	0.295274	0.523296	7	0.985334	1
7806A3A12238225	protein C	2	0.770552	0.8736427	18	0.999683	1
7806A3A12238383	cyclooxygenase -2	2	0.514066	0.6885088	7	0.999948	1
7806A3A12237017	neutrophil gelatinase-associated lipocalin	2	0.561377	0.7215393	17	0.947944	1
7806A3A12237651	NOS	2	0.334441	0.5586543	2	0.999996	1
7806A3A12251785	OX2R	2	0.00720824	0.1037056	2	0.478954	1
7806A3A12239729	UCHL1	2	0.148997	0.3767969	2	0.998473	1
8164A3A13872282	choline acetyltransferase	2	0.123393	0.3468141	2	0.996351	1
7806A3A12238228	AMPK	2	0.266218	0.5052478	8	0.943919	1
7806A3A12239554	cTnI	2	0.650539	0.7992234	73	0	0
8157A3A13974448	interleukin -1beta	2	0.81504	0.9033444	2	1	1
7806A3A12245936	Triggering receptor expressed on myeloid cells 2	2	0.0365001	0.2084954	3	0.736746	1
7806A3A12236713	interleukin 2	2	0.957338	0.9684147	18	1	1
7806A3A12244231	alpha 2	2	0.348409	0.5703477	2	0.999998	1
7806A3A12239780	vascular cell adhesion molecule-1	2	0.806001	0.89645	19	0.999861	1
7806A3A12238894	Syndecan-1	2	0.295674	0.523296	6	0.994347	1
7806A3A12237761	MOR	2	0.275445	0.5118686	1	0.999998	1
7806A3A12236482	haptoglobin	2	0.68424	0.8203523	12	0.999952	1
7806A3A12234064	angiopoietin-2	2	0.274844	0.5118686	17	0.179085	0.7148941
7806A3A12235565	thromboplastin	2	0.479414	0.6713513	18	0.75497	1
8164A3A13874126	interleukin-1 beta	2	0.863667	0.9281819	6	1	1
7806A3A12250893	NLRP3	2	0.654073	0.7992234	67	5.33788e-08	2.979742e-06
7806A3A12234427	C5a	2	0.425257	0.6364585	26	0.0601949	0.369381
7806A3A12234407	translocator protein	2	0.123213	0.3468141	1	0.999583	1
7806A3A12235091	CYP1A2	2	0.547952	0.7196308	3	1	1
7806A3A12238006	CPK	2	0.108328	0.3286686	8	0.426328	1
7806A3A12250154	alb	2	0.0569386	0.2395718	12	0.00462029	0.0764215
7806A3A12238278	PRL	2	0.527195	0.7018775	1	1	1
7806A3A12236746	IL-15	2	0.559029	0.7215393	23	0.613885	1
8164A3A13899999	NLRP3	2	0.569139	0.7273238	13	0.996012	1
7806A3A12236409	HMOX1	2	0.397469	0.6091793	13	0.892435	1
8164A3A13877405	TFEB	2	0.0295478	0.1882617	1	0.967314	1
7806A3A12248365	PRP	2	0.197607	0.4216877	1	0.999973	1
8164A3A13874124	IL-1RA	2	0.122314	0.3468141	1	0.999568	1
7806A3A12235113	CYP3A	2	0.604567	0.7616861	11	0.999731	1
7806A3A12239094	alpha synuclein	2	0.0543974	0.2385858	1	0.991808	1
7806A3A12236631	IFN-beta	2	0.872201	0.9326189	96	3.1201e-08	2.347536e-06
7806A3A12234298	beta-2-microglobulin	1	0.488706	0.6748077	1	0.999823	1
7806A3A12247339	ARS	1	0.274737	0.5118686	1	0.984034	1
7806A3A12243176	DMN	1	0.246925	0.4788198	1	0.974077	1
7806A3A12242130	NPC2	1	0.138331	0.3694349	1	0.853044	1
7806A3A12255518	ADC	1	0.406296	0.6142645	1	0.998788	1
7806A3A12243710	contactin-associated protein-2	1	0.197306	0.4216877	2	0.773522	1
7806A3A12238886	CXCL5	1	0.318827	0.5406724	4	0.725662	1
8157A3A13979398	NLRP3	1	0.4037	0.6124156	2	0.990148	1
7806A3A12241757	AC1	1	0.0556544	0.2385858	1	0.521713	1
7806A3A12234597	CD20 antigen	1	0.303804	0.5272241	2	0.946447	1
8164A3A13873831	HMGB1	1	0.795257	0.8909062	4	0.999998	1
7806A3A12237907	PECAM-1	1	0.950366	0.9655199	13	0.999999	1
7806A3A12234009	protein kinase B	1	0.90951	0.9448251	10	0.999996	1
7806A3A12237820	PCS	1	0.170154	0.3932056	2	0.691291	1
7806A3A12252403	Mate II	1	0.0735089	0.2687293	1	0.62596	1
7806A3A12245006	ASC	1	0.494252	0.6782658	9	0.511272	1
7806A3A12235573	Fatty Acid-Binding Protein 3	1	0.375747	0.5880111	1	0.997687	1
7806A3A12243381	CD2AP	1	0.14255	0.370849	1	0.862046	1
7806A3A12243888	AST	1	0.928935	0.9568245	106	3.61518e-08	2.490122e-06
7806A3A12234523	caspase-1	1	0.82223	0.9033444	24	0.375975	1
7806A3A12234408	Bruton tyrosine kinase	1	0.550211	0.7196308	13	0.232533	0.8198126
7806A3A12240698	neuropilin 1	1	0.395844	0.6087808	51	0	0
7806A3A12243255	TDP-43	1	0.653054	0.7992234	4	0.999359	1
8157A3A13978985	CD11b	1	0.318456	0.5406724	1	0.992832	1
7806A3A12238415	CD45	1	0.937416	0.9633353	13	0.999996	1
7806A3A12236219	GSTM1	1	0.721665	0.8492417	2	0.999999	1
7806A3A12237014	lipopolysaccharide binding protein	1	0.375066	0.5880111	6	0.560293	1
7806A3A12238041	alteplase	1	0.983419	0.9856289	39	0.978639	1
7806A3A12235114	CYP3A5	1	0.604102	0.7616861	2	0.999915	1
7806A3A12241148	ABCG2	1	0.840166	0.9183445	1	1	1
7806A3A12237271	macrophage migration inhibitory factor	1	0.594265	0.755106	3	0.999275	1
7806A3A12238861	RANTES	1	0.928935	0.9568245	40	0.167977	0.6945859
7806A3A12239531	transmembrane protease serine 2	1	0.432881	0.6423289	522	0	0
7806A3A12270293	PD-1	1	0.946134	0.9646868	40	0.361895	0.9985468
7806A3A12247136	Resistin	1	0.76928	0.8736427	4	0.999992	1
7806A3A12234936	CPB	1	0.16516	0.3927338	1	0.902219	1
7806A3A12245932	triggering receptor expressed on myeloid cells-1	1	0.256312	0.4927377	4	0.527252	1
7806A3A12236505	histamine H2 receptor	1	0.159679	0.389163	1	0.89362	1
7806A3A12242717	ECD	1	0.144419	0.371625	2	0.595457	1
7806A3A12233852	alpha-1 antichymotrypsin	1	0.498099	0.6814483	1	0.999861	1
8164A3A13876542	RANTES	1	0.76928	0.8736427	6	0.999831	1
7806A3A12242369	fibrinogen-like protein 2	1	0.0704723	0.2679208	1	0.609859	1
7806A3A12239783	POR	1	0.140678	0.370849	1	0.858115	1
7806A3A12236593	intercellular adhesion molecule -1	1	0.858007	0.9265645	23	0.68684	1
7806A3A12237672	ANP	1	0.47543	0.6713513	2	0.997702	1
7806A3A12238122	proopiomelanocortin	1	0.645981	0.7992234	2	0.999978	1
8164A3A13875193	beta2	1	0.608397	0.7622052	1	0.999994	1
7806A3A12234062	amphiphysin	1	0.0870514	0.2880367	1	0.690577	1
7806A3A12235450	alpha-enolase	1	0.400439	0.609542	1	0.998624	1
7806A3A12236654	IGF-II	1	0.885404	0.9343342	1	1	1
7806A3A12236714	IL1R1	1	0.221875	0.4477658	9	0.00574684	0.0764215
8164A3A13876557	MIP-2	1	0.822327	0.9033444	5	0.999997	1
7806A3A12237700	Neurotrophic Receptor Tyrosine Kinase1	1	0.946892	0.9646868	3	1	1
7806A3A12243848	fibroblast growth factor -21	1	0.451438	0.6495424	2	0.996165	1
7806A3A12240631	TNFSF12	1	0.152314	0.3795086	2	0.626727	1
7806A3A12237660	NOTCH3	1	0.53398	0.7066916	3	0.99681	1
7806A3A12238863	monocyte chemotactic protein-3	1	0.344342	0.568802	15	0.000486298	0.01168804
8157A3A13977721	MIP-2	1	0.385543	0.598611	2	0.986234	1
7806A3A12234603	T1-4	1	0.451737	0.6495424	4	0.949213	1
7806A3A12241968	beta2	1	0.666596	0.8100867	4	0.999575	1
7806A3A12250717	CA-125	1	0.974024	0.9806201	6	1	1
7806A3A12238744	S6K	1	0.325482	0.5498673	1	0.993727	1
7806A3A12244190	PLT	1	0.35884	0.5777713	12	0.0138965	0.1319171
7806A3A12238862	macrophage inflammatory protein 1 alpha	1	0.720752	0.8492417	19	0.288709	0.9034556
7806A3A12234132	TNFSF6	1	0.892956	0.9392886	5	1	1
7806A3A12240791	wave 1	1	0.35463	0.5741991	25	0	0
7806A3A12238040	uPAR	1	0.293091	0.5228743	1	0.988523	1
7806A3A12235546	EZH2	1	0.754345	0.8693485	1	1	1
8347A3A14196213	LMP-1	1	0.149536	0.3767969	1	0.875842	1
7806A3A12239584	thyroid peroxidase	1	0.649822	0.7992234	1	0.999999	1
7806A3A12238953	Sex Hormone Binding Globulin	1	0.90716	0.9448251	4	1	1
7806A3A12255536	sting	1	0.374384	0.5880111	7	0.396864	1
7806A3A12236312	hemoglobin-beta	1	0.918552	0.9505202	6	1	1
7806A3A12242351	HPA	1	0.676095	0.8149686	7	0.989538	1
7806A3A12236603	CFI	1	0.36441	0.5800381	13	0.00674243	0.0764215
7806A3A12239063	organic cation transporter-2	1	0.279075	0.5143283	2	0.922716	1
7806A3A12237168	monoamine oxidase B	1	0.560157	0.7215393	2	0.999704	1
7806A3A12248145	P2ry12	1	0.799019	0.8909062	12	0.984382	1
8164A3A13874018	IP-10	1	0.721513	0.8492417	10	0.965107	1
7806A3A12254239	NPC1	1	0.223571	0.4491562	3	0.630886	1
7806A3A12234700	S protein	1	0.414655	0.6226806	344	0	0
7806A3A12236212	glycogen synthase kinase 3beta	1	0.665138	0.8100867	3	0.999913	1
7806A3A12233994	aHR	1	0.510534	0.6876286	14	0.081977	0.4517873
7806A3A12241092	KLOTHO	1	0.488148	0.6748077	3	0.991552	1
7806A3A12235081	Cx3cr1	1	0.344342	0.568802	2	0.971895	1
7806A3A12239667	titin	1	0.364064	0.5800381	1	0.997062	1
7806A3A12237561	NFL	1	0.481404	0.6713513	14	0.0479891	0.3175722
7806A3A12237964	ABCB1	1	0.91093	0.9448251	9	0.999999	1
8164A3A13875925	CD45	1	0.744367	0.8631175	1	1	1
8164A3A13873270	cFOS	1	0.282996	0.5151682	1	0.986224	1
7806A3A12234862	CB2	1	0.480555	0.6713513	1	0.999783	1
7806A3A12237008	LAMP1	1	0.485629	0.6747369	6	0.853758	1
7806A3A12235863	gastrin	1	0.908916	0.9448251	2	1	1
7806A3A12238823	SAA	1	0.390216	0.6022019	15	0.00228845	0.0460484
7806A3A12236274	granzyme B	1	0.819396	0.9033444	22	0.52566	1
7806A3A12237362	macrophage scavenger receptor-1	1	0.169701	0.3932056	1	0.908852	1
7806A3A12235705	Fms-like tyrosine kinase-3	1	0.735431	0.8574088	2	0.999999	1
8164A3A13871941	Bdnf	1	0.745202	0.8631175	2	1	1
7806A3A12238889	CX3CL1	1	0.44994	0.6495424	5	0.880826	1
7806A3A12259210	BDNF	1	0.736295	0.8574088	2	0.999999	1
7806A3A12234763	chromogranin A	1	0.878251	0.9326189	1	1	1
8157A3A13975427	HMGB1	1	0.218899	0.4477658	1	0.958497	1
8164A3A13884627	ASC	1	0.470833	0.6708994	3	0.98815	1
7806A3A12236756	Interleukin 18	1	0.771783	0.8736427	21	0.349211	0.9842176
8164A3A13875898	cyclooxygenase -1	1	0.624297	0.7777555	1	0.999997	1
7806A3A12240090	TFEB	1	0.202542	0.4259237	2	0.787245	1
8164A3A13872097	caspase-1	1	0.875226	0.9326189	5	1	1
8164A3A13874676	annexin A1	1	0.228636	0.4552306	1	0.964689	1
8164A3A13872451	corticotropin-releasing hormone	1	0.553876	0.7215393	1	0.999969	1
7806A3A12237454	Mxa	1	0.36545	0.5800381	20	3.13209e-06	0.000114107
7806A3A12235157	dopamine beta-hydroxylase	1	0.287285	0.52085	1	0.987248	1
7806A3A12234114	apolipoprotein A1	1	0.972895	0.9806201	10	1	1
7806A3A12239180	steroid 5-alpha-reductase 2	1	0.188061	0.4130878	1	0.93166	1
7806A3A12236179	progranulin	1	0.451438	0.6495424	3	0.982992	1
7806A3A12235111	cytochrome P450 2D6	1	0.442997	0.6495424	1	0.999467	1
7806A3A12235031	PSS 4	1	0.134092	0.3646648	1	0.843453	1
7806A3A12238807	S100A12	1	0.478283	0.6713513	15	0.0235783	0.1961647
7806A3A12237677	BNP	1	0.652106	0.7992234	32	1.27432e-05	0.0004366754
7806A3A12235105	CYP2C19	1	0.861978	0.9281819	1	1	1
7806A3A12252202	bit	1	0.244457	0.476104	2	0.874993	1
7806A3A12238149	cyclophilin A	1	0.355334	0.5741991	7	0.335036	0.9606956
7806A3A12235606	CD16	1	0.842159	0.9183445	16	0.961376	1
7806A3A12235564	coagulation factor V	1	0.230316	0.4565375	2	0.8495	1
7806A3A12234598	CD19	1	0.877985	0.9326189	18	0.972987	1
7806A3A12238368	BZs	1	0.675742	0.8149686	1	1	1
7806A3A12241156	PERK	1	0.446026	0.6495424	4	0.94451	1
7806A3A12240143	FGF-23	1	0.79548	0.8909062	1	1	1
7806A3A12235632	fibrinogen alpha	1	0.280254	0.5143757	4	0.609221	1
7806A3A12258225	miR-146a	1	0.531942	0.7060897	9	0.638294	1
7806A3A12238494	RAGE	1	0.350393	0.5703477	7	0.319478	0.9359449
8164A3A13879456	mug	1	0.769657	0.8736427	8	0.998368	1
7806A3A12237876	programmed cell death 1	1	0.87468	0.9326189	9	0.999978	1
7806A3A12236785	IRR	1	0.13645	0.3666066	4	0.12172	0.5818687
7806A3A12236716	IL-3	1	0.943331	0.9646868	4	1	1
7806A3A12237033	galectin-3 binding protein	1	0.212483	0.4367162	1	0.953886	1
8164A3A13877603	TNFalpha	1	0.981172	0.9855917	18	1	1
7806A3A12235323	DUSP4	1	0.0925118	0.2962925	1	0.713585	1
7806A3A12244233	BBS9	1	0.593601	0.755106	2	0.999884	1
7806A3A12239304	synaptophysin	1	0.886151	0.9343342	1	1	1
8164A3A13872208	Cd68	1	0.481687	0.6713513	1	0.999789	1
8164A3A13876287	NF-kappaB p65	1	0.769657	0.8736427	4	0.999992	1
7806A3A12239432	TIE2	1	0.452932	0.6495424	6	0.784901	1
7806A3A12239017	SERT	1	0.604534	0.7616861	1	0.999994	1
7806A3A12239039	SLC12A1	1	0.0930066	0.2962925	1	0.71559	1
7806A3A12234112	apolipoprotein B	1	0.994122	0.994122	3	1	1
8164A3A13874030	interferon-beta	1	0.853923	0.9257661	8	0.999972	1
7806A3A12235900	GABRG2	1	0.0735089	0.2687293	1	0.62596	1
7806A3A12239478	Thrombomodulin	1	0.763547	0.8736427	18	0.578521	1
7806A3A12250801	ml -1	1	0.947383	0.9646868	29	0.940345	1
7806A3A12234544	Cbl C	1	0.349684	0.5703477	1	0.996082	1
7806A3A12247888	steep	1	0.724234	0.850022	36	2.11924e-05	0.0007052586
