# Supplementary material for: The New Version of the ANDDigest Tool with Improved AI-Based Short Names Recognition
Source: Int J Mol Sci. 2022 Nov 29;23(23):14934. doi: 10.3390/ijms232314934 (PMC9738852; doi:10.3390/ijms232314934)
Supplement: Supplementary file 1 [file ijms-23-14934-s001.zip › Supplementary_Table_S4.xlsx]

## Sheet: Table S4a
Supplementary Table S4a. A list of diseases co-occurring with COVID-19, including non-significant ones, reconstructed with ANDDigest
Object id	Object label	Documents Number	Co-occurrence Score	FDR
0A6A40137468	severe COVID-19	4584	2.08593e-08	3.496523e-06
0A6A40145045	Pneumonia	3944	7.00031e-08	4.968849e-06
0A6A40142367	cancer	3846	1	1
0A6A40130497	fever	3396	2.77321e-08	3.506271e-06
0A6A40130925	inflammation	3038	1	1
0A6A40140705	acute respiratory distress syndrome	2600	3.20772e-08	3.593681e-06
0A6A40143184	SARS	2573	1.65303e-08	3.496523e-06
0A6A40130071	infectious diseases	2524	3.42188e-08	3.627905e-06
0A6A40146764	influenza	2431	3.36938e-09	2.689255e-06
0A6A40147270	viral infection	2336	3.68056e-08	3.627905e-06
0A6A40140331	high blood pressure	2289	1	1
0A6A40130279	breathlessness	1935	4.75682e-08	4.236009e-06
0A6A40147599	Obesity	1927	1	1
0A6A40130456	fatigue	1738	1.01457e-08	3.203274e-06
0A6A40140562	respiratory failure	1628	8.96238e-09	3.203274e-06
0A6A40136128	thrombosis	1210	4.23309e-08	3.973384e-06
0A6A40147276	diabetes mellitus	924	1	1
0A6A40129672	hypoxemia	918	0.999997	1
0A6A40133022	disease progression	886	0.00011785	0.005606754
0A6A40143288	chronic obstructive pulmonary disease	862	1	1
0A6A40143122	asthma	828	1	1
0A6A40134019	acute kidney injury	800	5.46861e-08	4.457087e-06
0A6A40141582	diarrhea	794	1	1
0A6A40129667	anosmia	780	7.44441e-09	3.203274e-06
0A6A40129774	mental disorders	713	0.930854	1
0A6A40130675	heart failure	694	1	1
0A6A40141491	dementia	687	1	1
0A6A40130031	chronic disease	677	4.98221e-08	4.325804e-06
0A6A40131841	respiratory tract infections	674	6.50747e-09	3.203274e-06
0A6A40147277	type 2 diabetes	672	1	1
0A6A40133058	sepsis	666	1	1
0A6A40147345	Pulmonary Embolism	658	0.00515658	0.1755765
0A6A40130931	insomnia	632	2.97046e-08	3.506271e-06
0A6A40143912	tuberculosis	627	1	1
0A6A40137315	long covid	617	2.53135e-08	3.496523e-06
0A6A40130732	bleeding	615	1	1
0A6A40146437	chronic kidney disease	608	1	1
0A6A40131403	Neurological manifestations	591	1.06059e-09	2.689255e-06
0A6A40142352	thrombocytopenia	579	1	1
0A6A40142619	post-traumatic stress disorder	533	0.187158	1
0A6A40142814	multiple sclerosis	520	1	1
0A6A40133882	lung injury	506	3.76057e-08	3.627905e-06
0A6A40130085	confusion	481	2.61761e-08	3.496523e-06
0A6A40129943	cardiovascular diseases	476	0.992898	1
0A6A40131357	malignancy	469	1	1
0A6A40142375	breast cancer	457	1	1
0A6A40133823	venous thromboembolism	446	3.02874e-08	3.506271e-06
0A6A40132377	vomiting	418	0.997809	1
0A6A40132529	abdominal pain	409	0.723171	1
0A6A40145298	myocardial infarction	378	1	1
0A6A40134894	Inflammatory Bowel Disease	370	1	1
0A6A40133271	deep-vein thrombosis	370	0.814639	1
0A6A40142109	Generalized Anxiety Disorder	364	0.909449	1
0A6A40130005	chest pain	356	1.42962e-05	0.0007757922
0A6A40146774	disseminated mucormycosis	354	8.39831e-08	5.719084e-06
0A6A40141197	malaria	337	1	1
0A6A40137121	Middle East respiratory syndrome	335	2.57637e-08	3.496523e-06
0A6A40141578	Lung Cancer	334	1	1
0A6A40131352	nausea	329	0.997612	1
0A6A40141398	Guillain-Barre syndrome	327	1.56556e-08	3.496523e-06
0A6A40129766	bacterial infection	321	0.999992	1
0A6A40130858	Allergy	317	1	1
0A6A40129585	Ageusia	313	3.01442e-08	3.506271e-06
0A6A40146045	Rheumatoid Arthritis	312	1	1
0A6A40133657	overweight	310	1	1
0A6A40141642	Kawasaki Disease	309	6.00872e-08	4.536584e-06
0A6A40131669	pulmonary inflammation	297	2.96462e-06	0.0001745106
0A6A40130164	dengue	295	0.433444	1
0A6A40146783	lung disease	294	0.999991	1
0A6A40142110	Parkinson's Disease	291	1	1
0A6A40131947	convulsions	285	1	1
0A6A40129765	autoimmune diseases	283	1	1
0A6A40130124	cross infection	283	1.83023e-08	3.496523e-06
0A6A40142741	Hepatitis	282	1	1
0A6A40130484	fibrosis	282	1	1
0A6A40133157	hypercoagulability	276	2.11245e-08	3.496523e-06
0A6A40132474	weight loss	274	1	1
0A6A40147282	encephalopathy	271	1	1
0A6A40130161	Delirium	269	6.37427e-08	4.710179e-06
0A6A40133556	Malnutrition	269	1	1
0A6A40140716	heart disease	259	1	1
0A6A40147400	Encephalitis	255	0.999766	1
0A6A40129714	arrhythmia	252	1	1
0A6A40131865	rheumatic diseases	247	0.00543971	0.1834186
0A6A40140306	Alzheimer's Disease	247	1	1
0A6A40142609	state anxiety	245	1	1
0A6A40143527	coronary artery disease	240	1	1
0A6A40147220	colorectal cancer	239	1	1
0A6A40147014	psoriasis	239	1	1
0A6A40130192	Type 1 Diabetes	238	1	1
0A6A40140252	vitamin D deficiency	236	0.724811	1
0A6A40131970	septic shock	234	0.198197	1
0A6A40134139	cognitive impairments	233	1	1
0A6A40131779	psychosis	232	1	1
0A6A40143784	pulmonary fibrosis	229	0.295679	1
0A6A40146682	Appendicitis	227	0.396653	1
0A6A40146890	vasculitis	223	1	1
0A6A40144061	Hyperglycemia	222	1	1
0A6A40142492	epilepsy	220	1	1
0A6A40129409	Work-related stress	218	9.28776e-09	3.203274e-06
0A6A40133188	substance use disorders	217	1	1
0A6A40134795	rash	217	0.213306	1
0A6A40135514	atrial fibrillation	215	1	1
0A6A40131399	Neurological Disorders	215	1	1
0A6A40132174	thromboembolism	213	2.42761e-08	3.496523e-06
0A6A40140328	kidney failure	212	1	1
0A6A40145084	Kidney Disease	212	1	1
0A6A40145792	cerebrovascular disease	210	1	1
0A6A40130240	dizziness	209	0.0100952	0.318733
0A6A40133617	preterm birth	206	0.407116	1
0A6A40146869	Measles	204	0.974343	1
0A6A40133876	Acute Lung Injury	201	7.29657e-06	0.0004087256
0A6A40132470	weight gain	197	1	1
0A6A40133769	acute coronary syndrome	195	0.995264	1
0A6A40134105	chronic pain	191	1	1
0A6A40133121	hematological malignancies	190	0.970085	1
0A6A40145499	conjunctivitis	188	0.0130613	0.4086657
0A6A40142402	pneumothorax	187	0.999781	1
0A6A40132182	thrombus	186	1	1
0A6A40135606	cardiac arrest	186	1	1
0A6A40140084	prostate cancer	185	1	1
0A6A40142802	anemia	184	1	1
0A6A40140184	Common Cold	182	4.57462e-08	4.180962e-06
0A6A40144824	HIV infection	172	1	1
0A6A40130271	dysgeusia	172	3.87166e-09	2.689255e-06
0A6A40129685	anxiety disorders	172	0.921555	1
0A6A40140623	disseminated intravascular coagulation	170	0.996291	1
0A6A40144961	schizophrenia	168	1	1
0A6A40131348	necrosis	166	1	1
0A6A40145592	AIDS	165	1	1
0A6A40147305	acute myocardial infarction	164	1	1
0A6A40142336	Rheumatic disease	164	0.278485	1
0A6A40142288	cystic fibrosis	164	1	1
0A6A40143998	Liver Disease	162	1	1
0A6A40132013	sneezing	161	5.88038e-08	4.536584e-06
0A6A40129697	Eating disorders	159	0.777433	1
0A6A40130888	hypotension	157	1	1
0A6A40130306	edema	156	1	1
0A6A40142499	diabetic ketoacidosis	155	6.64551e-05	0.003250684
0A6A40129626	Anaphylaxis	153	0.909874	1
0A6A40147128	systemic lupus erythematosus	150	1	1
0A6A40132417	zoonoses	149	3.47814e-08	3.627905e-06
0A6A40131655	Pleural effusion	149	0.889557	1
0A6A40133056	Arthralgia	147	0.00107189	0.04379616
0A6A40142460	pericarditis	147	0.124303	1
0A6A40140961	head and neck cancer	145	1	1
0A6A40142096	vision loss	145	1	1
0A6A40135327	Autism Spectrum Disorder	145	1	1
0A6A40144044	Autoimmune Disease	143	1	1
0A6A40144708	cirrhosis	139	1	1
0A6A40130922	infarction	139	1	1
0A6A40143421	ischemia	139	1	1
0A6A40131316	fungal diseases	138	0.863371	1
0A6A40143285	interstitial lung disease	137	0.998636	1
0A6A40145483	lymphocytopenia	136	0.000319496	0.01404569
0A6A40131195	pneumomediastinum	136	1.85979e-08	3.496523e-06
0A6A40146771	arthritis	133	1	1
0A6A40134998	cardiomyopathy	131	1	1
0A6A40146944	bacterial pneumonia	130	0.502982	1
0A6A40129388	lymphadenopathy	130	0.989895	1
0A6A40141403	autism	129	1	1
0A6A40133515	hearing loss	128	1	1
0A6A40131079	leukocytosis	126	0.00291595	0.107735
0A6A40132748	ischemic heart disease	126	1	1
0A6A40133153	neurodegenerative diseases	126	1	1
0A6A40129669	anorexia	126	0.952342	1
0A6A40140432	obsessive compulsive disorder	124	1	1
0A6A40147486	IBD	124	1	1
0A6A40130097	convalescence	124	2.51385e-08	3.496523e-06
0A6A40134212	dysbiosis	124	0.581785	1
0A6A40142622	hepatitis B	122	1	1
0A6A40129320	Vicarious traumatization	121	2.01784e-09	2.689255e-06
0A6A40132135	tachycardia	121	1	1
0A6A40140266	pre-eclampsia	120	1	1
0A6A40131706	postoperative complications	119	1	1
0A6A40133466	metabolic syndrome	119	1	1
0A6A40132071	moral injury	118	8.79271e-08	5.761714e-06
0A6A40147859	melanoma	116	1	1
0A6A40131998	skin diseases	116	1	1
0A6A40143334	dyslipidemia	114	1	1
0A6A40133174	affective disorders	113	1	1
0A6A40143165	acute pancreatitis	112	1	1
0A6A40133872	macrophage activation syndrome	110	3.56557e-09	2.689255e-06
0A6A40144274	runny nose	108	1	1
0A6A40143041	dermatitis	108	1	1
0A6A40143246	substance abuse	107	1	1
0A6A40130154	dysphagia	107	1	1
0A6A40133663	stillbirth	107	0.0136429	0.4230517
0A6A40144183	cervical cancer	107	1	1
0A6A40146836	ulcerative colitis	106	1	1
0A6A40145482	leukopenia	106	1	1
0A6A40142351	immune thrombocytopenia	106	2.46348e-08	3.496523e-06
0A6A40132001	skin manifestations	105	8.18053e-09	3.203274e-06
0A6A40131105	liver dysfunction	105	1	1
0A6A40146816	herpes zoster	103	0.0401337	1
0A6A40130786	hip fractures	102	0.798678	1
0A6A40129996	chilblains	101	7.01047e-08	4.968849e-06
0A6A40142408	congenital heart disease	101	1	1
0A6A40129469	vaccine preventable diseases	100	5.25178e-08	4.448642e-06
0A6A40129386	ST elevation myocardial infarction	99	1.37682e-05	0.0007589993
0A6A40146969	Crohn's disease	99	1	1
0A6A40143451	Atopic Dermatitis	98	1	1
0A6A40147342	Postnatal Depression	98	0.999972	1
0A6A40130378	erythema	98	1	1
0A6A40144794	Infertility	97	1	1
0A6A40141003	allergic disease	96	1	1
0A6A40140843	gestational diabetes mellitus	95	1	1
0A6A40129647	sickle cell disease	95	1	1
0A6A40142544	atherosclerosis	95	1	1
0A6A40135362	lymphoma	94	1	1
0A6A40147373	multiple myeloma	94	1	1
0A6A40132410	wounds	94	1	1
0A6A40145241	proteinuria	94	1	1
0A6A40130677	heart diseases	94	0.999996	1
0A6A40147336	meningitis	93	1	1
0A6A40143586	plague	93	0.219383	1
0A6A40131780	pulmonary thromboembolism	93	1.12281e-07	7.221332e-06
0A6A40132358	viremia	93	0.994023	1
0A6A40147614	hypoglycaemia	93	1	1
0A6A40142347	alcohol use disorder	93	1	1
0A6A40131832	respiratory insufficiency	92	0.876673	1
0A6A40145398	congestive heart failure	92	1	1
0A6A40140169	chronic lymphocytic leukaemia	92	1	1
0A6A40140886	pericardial effusion	91	1	1
0A6A40145601	Migraine	91	1	1
0A6A40131869	Rhabdomyolysis	90	0.850912	1
0A6A40146921	peripheral neuropathy	90	1	1
0A6A40141140	neutropenia	90	1	1
0A6A40134446	hemophagocytic lymphohistiocytosis	89	1.95257e-06	0.0001169185
0A6A40132419	superinfection	89	2.33071e-08	3.496523e-06
0A6A40129740	asthenia	88	1.49397e-08	3.496523e-06
0A6A40135462	analgesia	88	1	1
0A6A40131838	wheezing	88	0.999998	1
0A6A40135158	obstructive sleep apnea syndrome	88	1	1
0A6A40140983	severe obesity	87	1	1
0A6A40142327	urticaria	87	1	1
0A6A40129968	intracerebral hemorrhage	87	0.999999	1
0A6A40131956	Sexually transmitted diseases	85	1	1
0A6A40130574	gastrointestinal diseases	85	0.999999	1
0A6A40133826	Tako-Tsubo syndrome	84	0.486445	1
0A6A40133078	muscle weakness	84	0.999835	1
0A6A40131538	Paralysis	84	1	1
0A6A40129758	Back Pain	84	1	1
0A6A40140704	pulmonary edema	82	1	1
0A6A40145625	pulmonary hypertension	80	1	1
0A6A40133190	genetic susceptibility	80	1	1
0A6A40129971	cerebrovascular diseases	79	0.505061	1
0A6A40131754	pruritus	79	1	1
0A6A40133512	hypoalbuminemia	79	0.0315507	0.8364548
0A6A40134082	tachypnea	79	7.24913e-08	5.035246e-06
0A6A40143880	Acute myocarditis	79	5.65618e-08	4.464526e-06
0A6A40133762	ventilator-associated pneumonia	77	0.182499	1
0A6A40134066	Out-of-Hospital Cardiac Arrest	77	0.938425	1
0A6A40142236	major depressive disorder	77	1	1
0A6A40129848	bradycardia	77	1	1
0A6A40146427	end stage kidney disease	76	1	1
0A6A40146905	eating disorder	75	1	1
0A6A40145694	acne	74	1	1
0A6A40140264	intellectual disability	74	1	1
0A6A40147469	type 1 Diabetes Mellitus	74	1	1
0A6A40145618	ADEM	73	3.17481e-05	0.001645689
0A6A40142410	Glaucoma	73	1	1
0A6A40147091	psoriatic arthritis	72	1	1
0A6A40130017	developmental disabilities	71	0.105312	1
0A6A40144190	myasthenia gravis	71	1	1
0A6A40144041	Skin cancer	71	1	1
0A6A40144648	pancreatitis	71	1	1
0A6A40133900	sarcopenia	71	0.999999	1
0A6A40130976	ketosis	70	0.228987	1
0A6A40131241	metabolic diseases	70	1	1
0A6A40130561	gambling	70	0.922254	1
0A6A40146662	cataract	70	1	1
0A6A40142220	hypothyroidism	70	1	1
0A6A40140438	ADHD	69	1	1
0A6A40131681	polio	69	0.661182	1
0A6A40130838	hyperlipidemia	69	1	1
0A6A40132437	inflammatory bowel diseases	68	1	1
0A6A40142858	state of hypercoagulability	68	0.999999	1
0A6A40137290	mild cognitive impairment	68	1	1
0A6A40132668	sudden cardiac death	68	1	1
0A6A40146999	lupus	67	1	1
0A6A40142069	Down syndrome	67	1	1
0A6A40131685	spontaneous pneumothorax	67	0.947357	1
0A6A40131279	Movement Disorders	67	0.999998	1
0A6A40130193	depressive disorder	67	0.999998	1
0A6A40129299	abscess	66	1	1
0A6A40142011	toxic shock syndrome	66	0.412408	1
0A6A40131462	opportunistic infections	66	0.999366	1
0A6A40141239	Bell's palsy	66	0.00285506	0.1066196
0A6A40129381	somatic symptoms	65	0.0686076	1
0A6A40146937	smallpox	65	0.99994	1
0A6A40138642	GPs	65	1	1
0A6A40141109	dengue fever	64	0.932479	1
0A6A40131575	pathological processes	64	1	1
0A6A40129884	burns	64	1	1
0A6A40144271	allergic rhinitis	63	1	1
0A6A40131307	musculoskeletal diseases	63	1.64891e-06	0.0001004678
0A6A40132195	tinnitus	63	1	1
0A6A40133889	Invasive pulmonary aspergillosis	63	0.0897488	1
0A6A40137205	transverse myelitis	62	0.000604206	0.02498104
0A6A40142462	vascular disease	62	1	1
0A6A40132075	subarachnoid hemorrhage	62	1	1
0A6A40146084	miscarriage	62	1	1
0A6A40143458	bipolar disorder	62	1	1
0A6A40140737	osteoporosis	61	1	1
0A6A40142557	cholecystitis	61	1	1
0A6A40143189	pulmonary tuberculosis	61	1	1
0A6A40130980	end-stage renal disease	61	1	1
0A6A40141532	uveitis	60	1	1
0A6A40131718	pregnancy complications	60	0.978386	1
0A6A40130163	demyelination	59	1	1
0A6A40130710	hematuria	59	0.999987	1
0A6A40134219	drug toxicity	59	1	1
0A6A40129747	ataxia	59	1	1
0A6A40130723	hemoptysis	59	0.998194	1
0A6A40134108	musculoskeletal pain	58	0.994559	1
0A6A40130977	kidney diseases	58	0.683887	1
0A6A40144059	systemic sclerosis	58	1	1
0A6A40140557	pertussis	57	1	1
0A6A40132108	Syncope	57	1	1
0A6A40145859	hepatocellular carcinoma	57	1	1
0A6A40130159	dehydration	57	1	1
0A6A40130725	hemolysis	57	1	1
0A6A40143172	bronchiolitis	57	0.995849	1
0A6A40144148	Ebola Virus Disease	57	0.00385677	0.1366792
0A6A40132363	vertigo	57	0.999999	1
0A6A40131464	oral manifestations	56	0.00283822	0.1066196
0A6A40146703	osteoarthritis	56	1	1
0A6A40144091	myopathy	56	1	1
0A6A40146966	rubella	56	0.999997	1
0A6A40134253	Cardiac Toxicity	55	1	1
0A6A40131686	poisoning	54	1	1
0A6A40130237	diathesis	54	0.999026	1
0A6A40145479	chronic bronchitis	53	1	1
0A6A40141743	aspergillosis	53	0.999865	1
0A6A40132078	subcutaneous emphysema	53	0.075667	1
0A6A40132631	bacteremia	53	1	1
0A6A40140502	Bladder Cancer	53	1	1
0A6A40130423	skin rash	52	0.417651	1
0A6A40147386	bronchiectasis	52	1	1
0A6A40130706	hematoma	52	1	1
0A6A40134180	maternal death	52	0.0270345	0.733522
0A6A40131269	oral cancer	52	1	1
0A6A40133625	diabetes-related complications	52	1	1
0A6A40144046	syphilis	51	1	1
0A6A40129304	psychological trauma	51	1.65996e-08	3.496523e-06
0A6A40130040	scarring	51	1	1
0A6A40145595	myositis	51	0.999971	1
0A6A40133038	left ventricular dysfunction	51	1	1
0A6A40143862	NSCLC	51	1	1
0A6A40130068	coma	50	1	1
0A6A40129403	invasive mycoses	50	0.0306413	0.8185941
0A6A40142615	autoimmune hepatitis	49	0.859272	1
0A6A40136677	non-alcoholic fatty liver disease	48	1	1
0A6A40133753	lethargy	48	0.86971	1
0A6A40135468	Colitis	48	1	1
0A6A40134450	sinusitis	48	1	1
0A6A40140913	myopia	48	1	1
0A6A40142905	blood cancer	48	1	1
0A6A40130319	Embolism	48	1	1
0A6A40133806	vesicular stomatitis	48	0.999426	1
0A6A40134405	Invasive Aspergillosis	48	0.963293	1
0A6A40134258	neurodevelopmental disorders	48	0.999742	1
0A6A40134252	neonatal death	48	0.938213	1
0A6A40129797	birth weight	48	1	1
0A6A40129777	barotrauma	47	9.50167e-05	0.004583236
0A6A40134196	Obesity in Childhood	47	1	1
0A6A40129457	sleepiness	47	1	1
0A6A40134184	binge drinking	47	0.312317	1
0A6A40129608	hair loss	47	0.991241	1
0A6A40142299	Cholera	47	1	1
0A6A40130874	numbness	47	1	1
0A6A40133773	Posterior reversible encephalopathy syndrome	47	0.609415	1
0A6A40140089	mumps	46	0.874192	1
0A6A40142713	colon cancer	46	1	1
0A6A40131562	paresis	46	1	1
0A6A40140670	Sarcoidosis	46	1	1
0A6A40142517	impotence	46	1	1
0A6A40129358	traumatic brain injury	46	1	1
0A6A40129655	aneurysm	46	1	1
0A6A40141918	facial palsy	45	1	1
0A6A40130889	hyponatremia	45	1	1
0A6A40144280	avian influenza	45	1	1
0A6A40143395	myelitis	45	0.628739	1
0A6A40132163	underweight	45	1	1
0A6A40132838	Diabetic Foot	45	1	1
0A6A40143225	Antiphospholipid syndrome	45	1	1
0A6A40132503	nasal obstruction	45	0.887944	1
0A6A40142738	haemophilia	44	1	1
0A6A40133053	systemic inflammatory response syndrome	44	0.875106	1
0A6A40137313	parkinsonism	44	1	1
0A6A40130087	stenosis	44	1	1
0A6A40135169	sleep apnea	44	1	1
0A6A40140242	Meningoencephalitis	44	0.999717	1
0A6A40142478	status epilepticus	43	1	1
0A6A40141213	Leukemia	43	1	1
0A6A40134378	Chikungunya	43	0.957812	1
0A6A40133519	rare diseases	43	0.999989	1
0A6A40140626	rabies	43	1	1
0A6A40142823	ovarian cancer	43	1	1
0A6A40131682	pneumoperitoneum	43	0.99998	1
0A6A40140337	thrombotic thrombocytopenic purpura	43	0.826821	1
0A6A40137235	urinary tract infection	43	1	1
0A6A40134470	idiopathic pulmonary fibrosis	42	1	1
0A6A40147149	acute myeloid leukemia	42	1	1
0A6A40147053	Immune Thrombocytopenic Purpura	42	0.99827	1
0A6A40143461	amyotrophic lateral sclerosis	42	1	1
0A6A40223094	leak	41	1	1
0A6A40145578	fibromyalgia	41	1	1
0A6A40132733	liver failure	41	1	1
0A6A40136123	Myeloma	41	1	1
0A6A40133033	Right Ventricular Dysfunction	41	0.779342	1
0A6A40146896	Varicella	41	0.999999	1
0A6A40141413	neurodegenerative disease	41	1	1
0A6A40142785	gastroenteritis	41	1	1
0A6A40147055	Diabetic retinopathy	41	1	1
0A6A40142752	TIA	40	1	1
0A6A40140918	Nephrotic Syndrome	40	1	1
0A6A40142330	angioedema	40	0.995906	1
0A6A40140669	Pneumocystis jirovecii pneumonia	40	1	1
0A6A40146061	thyroiditis	40	0.999999	1
0A6A40142297	candidiasis	40	1	1
0A6A40140283	celiac disease	40	1	1
0A6A40130321	Emphysema	40	1	1
0A6A40142813	relapsing-remitting multiple sclerosis	39	1	1
0A6A40146829	Chronic Fatigue Syndrome	39	0.999984	1
0A6A40137068	coronavirus infectious disease	39	8.57284e-08	5.725668e-06
0A6A40130395	Epistaxis	38	0.999995	1
0A6A40133176	cognitive manifestations	38	0.224262	1
0A6A40140740	cardiac tamponade	38	1	1
0A6A40130158	sudden death	37	1	1
0A6A40129878	binge eating	37	0.98355	1
0A6A40146647	Periodontitis	37	1	1
0A6A40147594	acute lymphoblastic leukaemia	37	1	1
0A6A40146911	anorexia nervosa	37	1	1
0A6A40146651	peritonitis	37	1	1
0A6A40131996	sleep deprivation	37	1	1
0A6A40133495	genetic disorders	36	1	1
0A6A40131546	paranoia	36	0.00189045	0.07377003
0A6A40144702	Adjustment Disorder	36	0.207473	1
0A6A40134505	erythema multiforme	36	0.130192	1
0A6A40140413	age-related macular degeneration	36	1	1
0A6A40130917	immune disorders	36	0.999455	1
0A6A40132316	urinary tract infections	35	1	1
0A6A40134349	bacterial sepsis	35	0.000140674	0.006602173
0A6A40143927	fetal distress	35	1	1
0A6A40140119	endocarditis	35	1	1
0A6A40130479	fetal death	35	0.999846	1
0A6A40140210	influenza pneumonia	35	3.49618e-06	0.000199053
0A6A40145443	Acute Stress Disorder	35	0.00246895	0.09422707
0A6A40145827	Juvenile Idiopathic Arthritis	35	1	1
0A6A40129531	acidosis	35	1	1
0A6A40142756	hidradenitis suppurativa	35	0.344711	1
0A6A40140830	Portal Vein Thrombosis	35	0.982649	1
0A6A40129518	pulmonary arterial hypertension	35	1	1
0A6A40132737	lower back pain	34	1	1
0A6A40141190	Graves' disease	34	1	1
0A6A40129744	bronchial asthma	34	1	1
0A6A40142047	diplopia	34	1	1
0A6A40133127	neck pain	34	1	1
0A6A40143481	purpura	34	0.999814	1
0A6A40146072	autoimmune haemolytic anaemia	34	0.852149	1
0A6A40142941	agammaglobulinemia	34	0.920357	1
0A6A40144412	endophthalmitis	34	1	1
0A6A40142587	rectal cancer	34	1	1
0A6A40134169	drug overdose	34	0.252574	1
0A6A40131765	restlessness	34	0.860823	1
0A6A40141078	Common Variable Immunodeficiency	34	0.590096	1
0A6A40130822	hypercholesterolemia	34	1	1
0A6A40142509	viral hepatitis	34	1	1
0A6A40135128	atrioventricular block	33	0.999991	1
0A6A40131144	lymphocytosis	33	0.613259	1
0A6A40141222	pancytopenia	33	1	1
0A6A40130647	hallucinations	33	1	1
0A6A40141897	polyneuropathy	33	1	1
0A6A40147428	Jungle yellow fever	33	0.995373	1
0A6A40131413	neuromyelitis optica spectrum disorder	33	0.493169	1
0A6A40134100	anhedonia	33	0.626676	1
0A6A40141201	bronchopneumonia	33	1	1
0A6A40142649	constipation	33	1	1
0A6A40147195	lichen planus	33	1	1
0A6A40129495	acute macular neuroretinopathy	33	0.766733	1
0A6A40132803	interstitial lung diseases	33	0.231928	1
0A6A40131566	paresthesia	33	0.99998	1
0A6A40146510	thyrotoxicosis	33	1	1
0A6A40129573	adrenal insufficiency	33	0.997682	1
0A6A40130841	overeating	33	0.999549	1
0A6A40144911	sleep disorder	32	1	1
0A6A40142570	Cerebral Palsy	32	1	1
0A6A40143212	IgA nephropathy	32	1	1
0A6A40147324	fatty liver disease	32	0.999917	1
0A6A40141025	optic neuritis	32	0.999961	1
0A6A40130875	hypocalcemia	32	1	1
0A6A40132176	thyroid cancer	32	1	1
0A6A40132602	Torsades de Pointes	32	0.856337	1
0A6A40130512	flushing	32	1	1
0A6A40141545	gout	32	1	1
0A6A40131210	memory loss	32	1	1
0A6A40140561	sarcoma	32	1	1
0A6A40131323	myoclonus	32	0.999907	1
0A6A40133912	Latent Tuberculosis Infection	32	0.989522	1
0A6A40138906	Feb	32	3.70932e-08	3.627905e-06
0A6A40140712	diphtheria	32	1	1
0A6A40141649	giant cell arteritis	32	0.999938	1
0A6A40130705	diseases of the blood	31	0.997417	1
0A6A40141581	typhoid	31	1	1
0A6A40143520	periodontal disease	31	1	1
0A6A40135040	alcohol dependence	31	1	1
0A6A40143183	Glomerulonephritis	31	1	1
0A6A40131557	parasitic infections	31	1	1
0A6A40146242	adenopathy	31	0.818432	1
0A6A40146044	Ankylosing Spondylitis	31	1	1
0A6A40129288	birth defects	30	1	1
0A6A40144297	hypokalemia	30	1	1
0A6A40131010	preterm labor	30	0.996488	1
0A6A40135064	metabolic acidosis	30	1	1
0A6A40132524	HIV coinfection	30	0.992049	1
0A6A40142865	psychotic disorder	30	0.99549	1
0A6A40130945	jaundice	30	1	1
0A6A40138772	orthostatic intolerance	30	0.977199	1
0A6A40143610	cerebral infarction	30	1	1
0A6A40129759	atelectasis	30	1	1
0A6A40133950	leukoencephalopathy	29	0.638319	1
0A6A40147931	Pancreatic Cancer	29	1	1
0A6A40133869	dysphonia	29	0.998773	1
0A6A40130481	fetal growth restriction	29	1	1
0A6A40130453	face pain	29	0.994734	1
0A6A40129854	brain death	29	1	1
0A6A40143073	contact dermatitis	29	1	1
0A6A40143727	skin disease	29	1	1
0A6A40140221	gastric cancer	29	1	1
0A6A40133847	Dysautonomia	29	0.0786967	1
0A6A40146823	Chronic myeloid leukaemia	29	1	1
0A6A40132740	acute liver failure	29	1	1
0A6A40148080	resting heart rate	28	1	1
0A6A40130089	connective tissue diseases	28	0.979268	1
0A6A40142216	neoplasm	28	1	1
0A6A40130458	Mental fatigue	28	6.33111e-05	0.003141135
0A6A40140404	neovascular age-related macular degeneration	28	0.999919	1
0A6A40133000	Respiratory Syncytial Virus Infection	28	0.999872	1
0A6A40135331	aphasia	28	1	1
0A6A40142897	Orchitis	28	0.991409	1
0A6A40133922	ANCA-associated vasculitides	28	0.648093	1
0A6A40142430	retinal vein occlusion	28	0.923285	1
0A6A40129315	autism spectrum disorders	28	1	1
0A6A40146756	Intussusception	28	1	1
0A6A40131395	neuralgia	28	1	1
0A6A40141568	Behcet's syndrome	28	1	1
0A6A40132746	ventricular tachycardia	27	1	1
0A6A40131965	circulatory collapse	27	0.999848	1
0A6A40134266	metabolic disease	27	1	1
0A6A40132458	dry eye	27	1	1
0A6A40130466	fatty liver	27	1	1
0A6A40140630	Chlamydia	27	1	1
0A6A40147181	pemphigus	27	0.999796	1
0A6A40142448	squamous cell carcinoma	27	1	1
0A6A40147617	eosinophilia	27	1	1
0A6A40131938	sclerosis	27	1	1
0A6A40132574	urinary retention	27	1	1
0A6A40144397	keratitis	27	1	1
0A6A40140188	Legionella	27	1	1
0A6A40134028	candidemia	27	0.985137	1
0A6A40135297	infective endocarditis	26	1	1
0A6A40133916	central obesity	26	1	1
0A6A40129291	spontaneous abortion	26	1	1
0A6A40140065	leprosy	26	1	1
0A6A40133201	shoulder pain	26	1	1
0A6A40130854	hyperplasia	26	1	1
0A6A40129366	multiple chronic conditions	26	0.00450897	0.1565965
0A6A40146929	pressure ulcer	26	1	1
0A6A40142419	aortic stenosis	26	1	1
0A6A40131414	Neuromuscular Diseases	26	0.935598	1
0A6A40140026	osteomyelitis	26	1	1
0A6A40140335	bubonic plague	26	0.0940926	1
0A6A40143474	mood-disorder	26	1	1
0A6A40129947	Catatonia	26	0.603869	1
0A6A40129593	airway obstruction	26	1	1
0A6A40131106	Liver Fibrosis	26	1	1
0A6A40146723	OCD	26	0.998688	1
0A6A40135165	limb ischemia	26	0.565364	1
0A6A40129306	symptom worsening	26	6.34935e-07	3.937731e-05
0A6A40144892	retinal detachment	25	1	1
0A6A40147542	Alopecia areata	25	0.98992	1
0A6A40144934	Oculomotor paralysis	25	1	1
0A6A40133177	neurocognitive disorders	25	0.348408	1
0A6A40139228	doors	25	0.0572983	1
0A6A40130206	Diabetic Kidney Disease	25	1	1
0A6A40129853	brain disorders	25	1	1
0A6A40132126	sinus tachycardia	25	0.016193	0.4806691
0A6A40137126	Urolithiasis	25	1	1
0A6A40141425	Miller Fisher syndrome	25	0.000361945	0.01571294
0A6A40140806	polycystic ovary syndrome	25	1	1
0A6A40140332	otitis media	25	1	1
0A6A40145507	reactive arthritis	25	0.74945	1
0A6A40130664	head injuries	25	1	1
0A6A40135107	androgenetic alopecia	25	0.743039	1
0A6A40134075	peripheral arterial disease	25	1	1
0A6A40129732	ascites	25	1	1
0A6A40130631	graft-vs-host disease	25	1	1
0A6A40130756	Hernia	25	1	1
0A6A40143665	neurotoxicity	25	1	1
0A6A40131035	learning disabilities	25	0.999901	1
0A6A40129763	Atrophy	25	1	1
0A6A40140447	minimal change disease	24	0.161956	1
0A6A40129804	bites	24	1	1
0A6A40129962	infection of the central nervous system	24	0.999997	1
0A6A40130630	granulomas	24	1	1
0A6A40133680	kidney insufficiency	24	1	1
0A6A40143134	glucose-6-phosphate dehydrogenase deficiency	24	0.995994	1
0A6A40133681	chronic renal insufficiency	24	0.999999	1
0A6A40143872	lung adenocarcinoma	24	1	1
0A6A40129820	bullae	24	1	1
0A6A40132295	ulcer	24	1	1
0A6A40129691	Apnea	24	1	1
0A6A40140922	coronary thrombosis	24	0.935865	1
0A6A40140072	thalassemia	24	1	1
0A6A40140848	prediabetes	24	1	1
0A6A40129428	marijuana use	24	0.999991	1
0A6A40143987	valvular heart disease	24	1	1
0A6A40141155	vitiligo	23	1	1
0A6A40146843	Hodgkin's lymphoma	23	1	1
0A6A40130823	hypercapnia	23	1	1
0A6A40130576	gastrointestinal cancer	23	1	1
0A6A40142358	clinical depression	23	1	1
0A6A40141291	Acute leukemia	23	1	1
0A6A40143250	acute kidney failure	23	0.840916	1
0A6A40141060	granulomatosis with polyangiitis	23	0.997289	1
0A6A40140567	HPV	23	1	1
0A6A40132652	panic attacks	23	0.648058	1
0A6A40146224	diverticulitis	23	1	1
0A6A40129382	NSTEMI	23	0.0435749	1
0A6A40223087	gangrene	23	1	1
0A6A40147546	alopecia	23	1	1
0A6A40130773	zoster	23	0.847073	1
0A6A40142334	mycoses	23	1	1
0A6A40142349	acute chest syndrome	23	0.525847	1
0A6A40132341	vascular diseases	23	1	1
0A6A40143572	cellulitis	23	1	1
0A6A40130927	Sterility	23	1	1
0A6A40145362	panic disorder	23	1	1
0A6A40130672	cardiomegaly	23	1	1
0A6A40143262	Carcinoma	22	1	1
0A6A40146834	herpes simplex	22	0.999754	1
0A6A40143257	food allergy	22	1	1
0A6A40132140	temporomandibular disorders	22	1	1
0A6A40141766	patent foramen ovale	22	1	1
0A6A40140185	tonsillitis	22	0.999964	1
0A6A40129741	asphyxia	22	1	1
0A6A40130440	eye diseases	22	0.999999	1
0A6A40133780	livedo reticularis	22	0.000370497	0.01588563
0A6A40130848	hypernatremia	22	0.861346	1
0A6A40142699	dental caries	22	1	1
0A6A40136441	con	22	0.680364	1
0A6A40134104	Lower urinary tract symptoms	22	1	1
0A6A40131679	Pneumopericardium	22	0.0302416	0.8141789
0A6A40133063	ventricular dysfunction	22	0.909256	1
0A6A40143131	hemoglobinopathy	21	0.999998	1
0A6A40134186	carcinogenesis	21	1	1
0A6A40143800	Empyema	21	1	1
0A6A40130523	foreign bodies	21	1	1
0A6A40129712	Perforated Appendicitis	21	0.0436891	1
0A6A40135420	alexithymia	21	0.999574	1
0A6A40141430	Sjogren's syndrome	21	1	1
0A6A40145623	encephalomyelitis	21	1	1
0A6A40129960	CNS diseases	21	1	1
0A6A40130898	hypothermia	21	1	1
0A6A40144627	Poliomyelitis	21	1	1
0A6A40142902	splenic infarction	21	0.018582	0.5333495
0A6A40132411	Hyposalivation	21	0.999998	1
0A6A40130827	hyperemia	21	1	1
0A6A40141503	central retinal artery occlusion	21	0.101926	1
0A6A40135041	nicotine dependence	21	0.999999	1
0A6A40132440	hypertriglyceridemia	21	1	1
0A6A40146978	unstable angina	21	1	1
0A6A40142733	thrombocytosis	21	1	1
0A6A40132233	tremor	21	1	1
0A6A40146810	polymyalgia rheumatica	21	0.907108	1
0A6A40140251	critical illness myopathy	21	0.00121478	0.04905734
0A6A40141656	alpha-1 antitrypsin deficiency	21	0.975566	1
0A6A40129799	mania	20	1	1
0A6A40142074	adult-onset Still's disease	20	0.395995	1
0A6A40133679	Hemophagocytic Syndrome	20	0.826182	1
0A6A40131823	recrudescence	20	0.858751	1
0A6A40142769	leptospirosis	20	1	1
0A6A40147010	neuromyelitis optica	20	0.999715	1
0A6A40146516	hyperthyroidism	20	1	1
0A6A40146363	Abdominal Aortic Aneurysm	20	1	1
0A6A40141252	Hepatitis A	20	1	1
0A6A40146277	gonorrhea	20	1	1
0A6A40142520	sexual dysfunction	20	1	1
0A6A40135551	ptosis	20	1	1
0A6A40142536	hypogonadism	20	1	1
0A6A40146799	bullous pemphigoid	20	0.999954	1
0A6A40129880	occupational burnout	20	0.000158715	0.007349563
0A6A40133871	ventilator-induced lung injury	20	0.306681	1
0A6A40135357	non-Hodgkin lymphoma	20	1	1
0A6A40130673	asystole	20	0.999902	1
0A6A40137214	chronic spontaneous urticaria	20	0.812673	1
0A6A40133393	photophobia	20	0.999565	1
0A6A40135122	Peripheral artery disease	19	1	1
0A6A40134020	atherosclerotic plaques	19	1	1
0A6A40143145	endometriosis	19	1	1
0A6A40141383	tetraplegia	19	1	1
0A6A40131611	Peripheral nerve diseases	19	0.969277	1
0A6A40132323	urinary incontinence	19	1	1
0A6A40140010	Dry Eye Disease	19	0.999831	1
0A6A40147320	intracranial hypertension	19	1	1
0A6A40133297	Acute demyelinating inflammatory polyneuropathy	19	0.00142165	0.05675161
0A6A40131308	myopathies	19	1	1
0A6A40130092	depressed level of consciousness	19	0.802034	1
0A6A40145286	hemolytic anemia	19	1	1
0A6A40131284	polytrauma	19	1	1
0A6A40132874	parainfluenza	19	0.0831175	1
0A6A40146380	gastrointestinal disease	19	1	1
0A6A40130133	cyanosis	19	0.999968	1
0A6A40131792	petechiae	19	0.37309	1
0A6A40133929	drug-induced liver injury	19	0.999897	1
0A6A40143213	adenocarcinoma	19	1	1
0A6A40141223	aplastic anemia	19	1	1
0A6A40133921	systemic vasculitis	19	0.999985	1
0A6A40135622	Ectopic Pregnancy	18	1	1
0A6A40147371	Lassa fever	18	0.267284	1
0A6A40145573	genetic disease	18	1	1
0A6A40139939	sensorineural hearing loss	18	1	1
0A6A40144687	esophageal cancer	18	1	1
0A6A40141404	Hypochondriasis	18	0.994993	1
0A6A40146074	Hashimoto's disease	18	1	1
0A6A40147316	allergic asthma	18	1	1
0A6A40143269	Glioblastoma	18	1	1
0A6A40143065	hyperbilirubinemia	18	1	1
0A6A40129322	drug-resistant epilepsy	18	1	1
0A6A40140631	cytomegalovirus infection	18	1	1
0A6A40130343	endocrine diseases	18	0.312627	1
0A6A40142977	renal cancer	18	1	1
0A6A40136066	Pemphigus vulgaris	18	1	1
0A6A40141166	male infertility	18	1	1
0A6A40132169	thyroid diseases	18	0.996959	1
0A6A40141985	anterior uveitis	18	0.999805	1
0A6A40146661	scabies	18	0.980312	1
0A6A40141271	Acute tubular necrosis	18	1	1
0A6A40147283	proptosis	18	1	1
0A6A40140874	Lyme disease	18	1	1
0A6A40145706	adenoma	18	1	1
0A6A40137278	childhood asthma	17	1	1
0A6A40132096	surgical site infection	17	1	1
0A6A40130477	femoral neck fractures	17	0.999964	1
0A6A40143532	Peripheral Vascular Disease	17	1	1
0A6A40131430	occupational diseases	17	0.993784	1
0A6A40131344	opioid dependence	17	0.999999	1
0A6A40142749	Pharyngitis	17	1	1
0A6A40141423	dilated cardiomyopathy	17	1	1
0A6A40130870	hyperventilation	17	1	1
0A6A40143645	liver cancer	17	1	1
0A6A40130328	Brain Inflammation	17	0.985528	1
0A6A40130242	trisomy 21	17	1	1
0A6A40132345	ventricular fibrillation	17	1	1
0A6A40142857	Central retinal vein occlusion	17	0.843136	1
0A6A40132728	Beta-thalassemia	16	1	1
0A6A40130627	G6PD deficiency	16	0.278657	1
0A6A40130441	facial dermatoses	16	3.33071e-07	2.103192e-05
0A6A40141309	hypercalcemia	16	1	1
0A6A40132375	verruca	16	1	1
0A6A40130266	dysarthria	16	1	1
0A6A40130478	femoral fractures	16	1	1
0A6A40140050	dermatomyositis	16	1	1
0A6A40142531	hyperuricemia	16	1	1
0A6A40144637	lymphoedema	16	1	1
0A6A40134225	acute-on-chronic liver failure	16	0.911759	1
0A6A40129856	brain injuries	16	1	1
0A6A40146740	intestinal obstruction	16	1	1
0A6A40147224	frontotemporal dementia	16	1	1
0A6A40146794	cardiopulmonary disease	16	1	1
0A6A40132292	unconsciousness	16	0.999955	1
0A6A40147051	Learning Disability	16	0.999998	1
0A6A40143080	irritant contact dermatitis	16	0.998241	1
0A6A40133308	Tics	16	0.999991	1
0A6A40130658	hand injuries	15	0.711214	1
0A6A40143259	Allergic Contact Dermatitis	15	1	1
0A6A40134231	nonalcoholic steatohepatitis	15	1	1
0A6A40141478	retinopathy of prematurity	15	1	1
0A6A40141878	familial hypercholesterolemia	15	1	1
0A6A40137215	erythema nodosum	15	0.850967	1
0A6A40144260	Cushing's syndrome	15	1	1
0A6A40143125	bruxism	15	0.999562	1
0A6A40130833	hyperkalemia	15	1	1
0A6A40134737	Stevens-Johnson syndrome	15	0.999995	1
0A6A40129330	long-term adverse effects	15	0.239278	1
0A6A40134240	mesenteric ischemia	15	0.964574	1
0A6A40130416	sick euthyroid syndrome	15	0.00202377	0.07809504
0A6A40146939	seborrheic dermatitis	15	0.999887	1
0A6A40129876	brain tumors	15	1	1
0A6A40132089	withdrawal symptoms	15	0.999963	1
0A6A40134206	Febrile Neutropenia	15	1	1
0A6A40129472	Vectorborne diseases	15	0.953067	1
0A6A40129893	corpse	15	0.784418	1
0A6A40140154	neuralgic amyotrophy	15	0.002969	0.1085404
0A6A40145053	head and neck squamous cell carcinoma	15	1	1
0A6A40143666	retinitis	15	0.997711	1
0A6A40131646	pityriasis	15	0.0209799	0.5876064
0A6A40144249	renal cell carcinoma	15	1	1
0A6A40145131	eye disease	15	1	1
0A6A40132039	splenomegaly	15	1	1
0A6A40145644	viral encephalitis	15	0.999925	1
0A6A40142771	cerebral ischemia	15	1	1
0A6A40133105	iron overload	15	1	1
0A6A40129855	cerebral vasogenic edema	15	1	1
0A6A40146345	muscle wasting	15	1	1
0A6A40142763	lateral sclerosis	15	1	1
0A6A40143390	demyelinating disease	15	1	1
0A6A40143264	taste disorder	15	0.000409248	0.01733315
0A6A40129446	Imported Infections	14	3.98136e-05	0.002033421
0A6A40145446	paraplegia	14	1	1
0A6A40133914	acute generalized exanthematous pustulosis	14	0.974138	1
0A6A40134471	aspiration pneumonia	14	0.999997	1
0A6A40129676	anthrax	14	1	1
0A6A40145669	connective tissue disease	14	1	1
0A6A40133409	hypovolemia	14	0.999997	1
0A6A40140537	pulpitis	14	0.999651	1
0A6A40141599	Rift Valley fever	14	0.975168	1
0A6A40143677	aortic aneurysm	14	1	1
0A6A40147649	atopy	14	1	1
0A6A40143632	Cavernous Sinus Thrombosis	14	0.696231	1
0A6A40131994	sleep disordered breathing	14	1	1
0A6A40143367	myelopathy	14	1	1
0A6A40146798	Follicular Lymphoma	14	1	1
0A6A40133546	genome stability	14	1	1
0A6A40143804	cranial nerve palsy	14	0.0192534	0.5480906
0A6A40137154	Aortic Dissection	14	1	1
0A6A40140414	hydrocephalus	14	1	1
0A6A40142444	histoplasmosis	14	1	1
0A6A40141356	Peritonsillar abscess	14	0.314064	1
0A6A40130923	human influenza	14	0.765942	1
0A6A40131217	melena	14	0.984464	1
0A6A40134249	atypical hemolytic uremic syndrome	14	0.639756	1
0A6A40144391	uremia	14	1	1
0A6A40141930	schistosomiasis	14	1	1
0A6A40147322	cholangitis	14	1	1
0A6A40136654	mucositis	14	1	1
0A6A40132314	Urological Cancer	14	0.944017	1
0A6A40141010	cryptococcosis	14	1	1
0A6A40131628	claustrophobia	14	0.935689	1
0A6A40142032	X-linked agammaglobulinemia	14	0.622872	1
0A6A40130111	Cranial neuropathies	14	0.855645	1
0A6A40141388	Polyneuritis	14	0.207276	1
0A6A40141068	bulimia nervosa	14	1	1
0A6A40133039	hypodynamia	14	1	1
0A6A40130869	hypertrophy	14	1	1
0A6A40142276	hereditary angioedema	14	0.999936	1
0A6A40142532	malignant melanoma	13	1	1
0A6A40133349	abducens nerve palsy	13	0.988971	1
0A6A40144626	primary myelofibrosis	13	1	1
0A6A40140750	mitral regurgitation	13	1	1
0A6A40140989	testicular torsion	13	0.988321	1
0A6A40140534	Henoch-Schonlein Purpura	13	0.972827	1
0A6A40141458	agranulocytosis	13	1	1
0A6A40140446	strongyloidiasis	13	0.969554	1
0A6A40147117	Leishmaniasis	13	1	1
0A6A40130157	cardiac death	13	1	1
0A6A40147035	cutaneous melanoma	13	1	1
0A6A40129566	adjustment disorders	13	0.0495912	1
0A6A40132835	community-acquired infections	13	0.810253	1
0A6A40130949	intraoperative complications	13	1	1
0A6A40140025	Osteonecrosis	13	1	1
0A6A40141053	Chagas disease	13	1	1
0A6A40140731	benign intracranial hypertension	13	0.999998	1
0A6A40140428	sickle cell anaemia	13	1	1
0A6A40133138	Systemic Capillary Leak Syndrome	13	0.869585	1
0A6A40142638	intestinal perforation	13	0.997354	1
0A6A40134134	Anti-NMDA receptor encephalitis	13	0.99269	1
0A6A40136636	Lupus Nephritis	13	1	1
0A6A40141751	cholestasis	13	1	1
0A6A40133844	postural tachycardia syndrome	13	0.00371044	0.1328491
0A6A40146722	Hypersensitivity Pneumonitis	13	1	1
0A6A40129670	animal diseases	13	0.938157	1
0A6A40141860	endometrial cancer	13	1	1
0A6A40132629	fungemia	13	0.873707	1
0A6A40130347	enteritis	12	1	1
0A6A40130749	hepatitis b virus infection	12	1	1
0A6A40130893	Orthostatic Hypotension	12	1	1
0A6A40147191	diabetic macular edema	12	1	1
0A6A40129400	Cancer pain	12	1	1
0A6A40132264	mycobacterium tuberculosis infection	12	0.999998	1
0A6A40140514	brucellosis	12	1	1
0A6A40140348	methemoglobinemia	12	0.976649	1
0A6A40129730	arteritis	12	1	1
0A6A40129369	Late-Onset Neonatal Sepsis	12	0.999997	1
0A6A40130935	insulin sensitivity	12	1	1
0A6A40141603	mycoplasma pneumonia	12	0.995161	1
0A6A40131351	nasal polyps	12	1	1
0A6A40144952	strabismus	12	1	1
0A6A40140613	Orbital cellulitis	12	0.908168	1
0A6A40129764	with attention deficit hyperactivity disorder	12	1	1
0A6A40140429	borderline personality disorder	12	1	1
0A6A40141059	hemophilia A	12	1	1
0A6A40143210	familial Mediterranean fever	12	0.999992	1
0A6A40135053	Mantle Cell Lymphoma	12	1	1
0A6A40133665	bone fractures	12	1	1
0A6A40129633	Haemolytic Anaemia	12	0.997199	1
0A6A40130387	aura	12	1	1
0A6A40130597	glioma	12	1	1
0A6A40129609	Alzheimer's dementia	12	1	1
0A6A40129726	arteriovenous fistulas	12	1	1
0A6A40130155	Deafness	12	1	1
0A6A40130189	maculopapular exanthem	12	0.0153472	0.4594899
0A6A40144975	dystonia	12	1	1
0A6A40141340	newborn Respiratory Distress Syndrome	12	0.999997	1
0A6A40146183	blood disease	12	0.999995	1
0A6A40133303	hemorrhage of brain	12	0.905664	1
0A6A40130363	enterocolitis	12	0.999952	1
0A6A40142178	Fabry disease	12	1	1
0A6A40130643	stunted growth	12	1	1
0A6A40135576	paroxysmal nocturnal hemoglobinuria	12	0.994877	1
0A6A40143989	tricuspid regurgitation	12	1	1
0A6A40142131	critical illness polyneuropathy	12	0.092654	1
0A6A40130149	sudden hearing loss	12	0.986484	1
0A6A40146985	SIRS	12	0.803379	1
0A6A40132670	feline infectious peritonitis	12	0.102451	1
0A6A40147025	Rosacea	12	0.99996	1
0A6A40142082	Oral Candidiasis	11	0.999805	1
0A6A40134120	occupational injuries	11	0.784418	1
0A6A40142403	Cystitis	11	1	1
0A6A40129833	bilateral blindness	11	0.92714	1
0A6A40144145	polyradiculoneuropathy	11	0.981496	1
0A6A40140644	typhus	11	0.999867	1
0A6A40147543	disseminated tuberculosis	11	0.999986	1
0A6A40144251	macular edema	11	1	1
0A6A40129456	nosocomial pneumonia	11	0.999601	1
0A6A40133435	Parsonage-Turner syndrome	11	0.276812	1
0A6A40146009	B-cell Lymphoma	11	1	1
0A6A40130730	postpartum hemorrhage	11	0.999993	1
0A6A40133677	primary cough headache	11	0.679563	1
0A6A40141760	eclampsia	11	1	1
0A6A40130731	hematochezia	11	1	1
0A6A40131561	idiopathic parkinson's disease	11	0.999999	1
0A6A40133366	Cerebral Stroke	11	0.999982	1
0A6A40131834	respiratory tract diseases	11	0.606543	1
0A6A40131155	maculopathy	11	0.99998	1
0A6A40140982	hypertrophic cardiomyopathy	11	1	1
0A6A40134203	ankle fractures	11	0.998752	1
0A6A40147518	refractive error	11	1	1
0A6A40129373	Zika virus infection	11	0.999998	1
0A6A40133770	Pulmonary infarction	11	0.517937	1
0A6A40133958	renal colic	11	0.95244	1
0A6A40144720	thoracic cancer	11	0.719586	1
0A6A40141203	dysentery	11	1	1
0A6A40140629	social phobia	11	0.999584	1
0A6A40143124	long QT syndrome	11	1	1
0A6A40146931	vascular dementia	11	1	1
0A6A40143287	gingivitis	11	1	1
0A6A40145322	nephrolithiasis	11	1	1
0A6A40141991	Plasmodium falciparum malaria	11	1	1
0A6A40132054	starvation	11	1	1
0A6A40134170	prodromal symptoms	11	0.998252	1
0A6A40131281	Kawasaki syndrome	11	0.230007	1
0A6A40130160	Delta infection	11	2.76625e-05	0.001468753
0A6A40144208	neuromuscular disease	11	0.999999	1
0A6A40134043	eye pain	11	0.20978	1
0A6A40140373	essential hypertension	11	1	1
0A6A40141149	Crimean-Congo hemorrhagic fever	11	0.531857	1
0A6A40134475	lower respiratory tract disease	11	0.134195	1
0A6A40147200	pityriasis rubra pilaris	11	0.263719	1
0A6A40133126	endotoxemia	10	1	1
0A6A40134498	Tick-borne encephalitis	10	1	1
0A6A40129482	intergenerational trauma	10	0.0173591	0.5109166
0A6A40133443	right flank pain	10	0.999995	1
0A6A40143938	multidrug-resistant tuberculosis	10	1	1
0A6A40133670	difficulty walking	10	0.420272	1
0A6A40129525	respiratory acidosis	10	0.97328	1
0A6A40142540	Gaucher disease	10	1	1
0A6A40133049	tension-type headache	10	0.998886	1
0A6A40140841	Duchenne muscular dystrophy	10	1	1
0A6A40129433	Kounis syndrome	10	0.333536	1
0A6A40129749	Paroxysmal Atrial Fibrillation	10	1	1
0A6A40140538	Tourette syndrome	10	1	1
0A6A40129872	bronchopulmonary dysplasia	10	1	1
0A6A40133969	thrombotic microangiopathies	10	0.0435928	1
0A6A40132060	toxic epidermal necrolysis	10	1	1
0A6A40135006	chorioamnionitis	10	1	1
0A6A40138705	diabetes mellitus type 2	10	0.985417	1
0A6A40142729	essential thrombocythemia	10	1	1
0A6A40129887	cachexia	10	1	1
0A6A40135148	Non-arteritic anterior ischaemic optic neuropathy	10	0.946203	1
0A6A40129975	hypoxic encephalopathy	10	0.99589	1
0A6A40133890	small-cell lung cancer	10	1	1
0A6A40144436	brain edema	10	1	1
0A6A40140708	pyelonephritis	10	1	1
0A6A40142168	Neuroleptic malignant syndrome	10	0.949201	1
0A6A40131149	non-Hodgkin's lymphoma	10	1	1
0A6A40135613	inguinal hernia	10	1	1
0A6A40134261	pulmonary arterial remodeling	10	1	1
0A6A40141518	focal segmental glomerulosclerosis	10	1	1
0A6A40145762	Alps	10	0.995585	1
0A6A40147069	Narcolepsy	10	1	1
0A6A40133453	lacerations	10	1	1
0A6A40143690	lactic acidosis	10	1	1
0A6A40132226	toothache	10	0.628266	1
0A6A40140664	pituitary apoplexy	10	0.892507	1
0A6A40131885	RNA virus infections	10	4.52563e-05	0.0022779
0A6A40131744	benign prostatic hyperplasia	10	1	1
0A6A40131184	mast cell activation syndrome	10	0.00734508	0.2361987
0A6A40132475	ischemia-reperfusion injury	10	1	1
0A6A40147306	hypopituitarism	10	1	1
0A6A40147271	scotoma	10	0.99748	1
0A6A40140086	left bundle branch block	10	1	1
0A6A40141558	right bundle branch block	10	1	1
0A6A40142853	acromegaly	10	1	1
0A6A40131478	Heterotopic ossification	10	1	1
0A6A40131698	polyps	10	1	1
0A6A40129414	transfusion-related acute lung injury	10	0.512453	1
0A6A40131987	sinus thrombosis	10	0.61217	1
0A6A40135469	Ischemic Colitis	10	0.991277	1
0A6A40131453	oliguria	10	0.999112	1
0A6A40131146	lymphoproliferative disorders	10	1	1
0A6A40133163	Severe Dengue	10	0.941309	1
0A6A40131330	idiopathic inflammatory myopathies	10	0.999808	1
0A6A40129533	primary antibody deficiencies	10	0.999822	1
0A6A40140606	viral conjunctivitis	10	0.472453	1
0A6A40129470	gestational weight gain	10	1	1
0A6A40130514	food poisoning	10	1	1
0A6A40141004	Panuveitis	10	0.988876	1
0A6A40145170	retinal disease	10	1	1
0A6A40132813	pseudoaneurysm	10	1	1
0A6A40141692	Coccidioidomycosis	10	0.978692	1
0A6A40141104	dementia with Lewy bodies	10	1	1
0A6A40134243	Cerebrospinal Fluid Leak	10	1	1
0A6A40135765	Zika virus disease	10	0.315691	1
0A6A40147427	aphthous stomatitis	10	0.993978	1
0A6A40140544	hydronephrosis	9	1	1
0A6A40130908	hysteria	9	0.965498	1
0A6A40130437	facial injuries	9	0.947033	1
0A6A40130288	ecchymosis	9	0.994834	1
0A6A40143115	Acute Acalculous Cholecystitis	9	0.985794	1
0A6A40140419	amnesia	9	1	1
0A6A40131553	monoclonal gammopathies	9	1	1
0A6A40141516	HELLP syndrome	9	0.99976	1
0A6A40139947	PID	9	1	1
0A6A40142900	prostate adenocarcinoma	9	1	1
0A6A40129832	body weight changes	9	0.986081	1
0A6A40143523	syndrome of inappropriate secretion of antidiuretic hormone	9	0.995246	1
0A6A40146739	Ileus	9	1	1
0A6A40143398	tracheal stenosis	9	0.99992	1
0A6A40142602	hyperinsulinemia	9	1	1
0A6A40130292	otalgia	9	0.904738	1
0A6A40141517	Severe pre-eclampsia	9	1	1
0A6A40133421	hypoxic-ischemic encephalopathy	9	0.999993	1
0A6A40140439	nephritis	9	1	1
0A6A40147338	bacterial meningitis	9	1	1
0A6A40146831	Herpes zoster ophthalmicus	9	0.87838	1
0A6A40145848	compartment syndrome	9	1	1
0A6A40141590	Porphyria	9	1	1
0A6A40131804	quadriparesis	9	0.993026	1
0A6A40141314	vestibular neuritis	9	0.959277	1
0A6A40145699	inborn errors of metabolism	9	0.999942	1
0A6A40131819	hyporeflexia	9	0.996947	1
0A6A40134117	acute pain	9	1	1
0A6A40130239	consumption coagulopathy	9	0.201468	1
0A6A40129441	Injection site reaction	9	0.387978	1
0A6A40137016	non-alcoholic steatohepatitis	9	1	1
0A6A40133075	premature ventricular complexes	9	1	1
0A6A40140458	membranous nephropathy	9	1	1
0A6A40131026	language disorders	9	0.915119	1
0A6A40147250	Priapism	9	0.999934	1
0A6A40129752	sports injuries	9	0.997199	1
0A6A40144957	schizoaffective disorder	9	1	1
0A6A40144994	African Swine Fever	9	0.922763	1
0A6A40147150	amyloidosis	9	1	1
0A6A40146576	Septic Arthritis	9	1	1
0A6A40137207	Sweet's syndrome	9	0.89856	1
0A6A40147592	Toxoplasmosis	9	1	1
0A6A40131607	periodontal diseases	9	1	1
0A6A40131513	postoperative pain	9	1	1
0A6A40131618	personality disorders	9	1	1
0A6A40142360	acute rheumatic fever	9	1	1
0A6A40130076	Communication Disorders	9	0.995076	1
0A6A40140819	hyperlipidaemia	9	1	1
0A6A40146838	mononucleosis	9	1	1
0A6A40141645	Pernicious anaemia	9	0.999999	1
0A6A40132107	pus	9	1	1
0A6A40132304	urinary stones	9	0.999997	1
0A6A40142511	hepatitis C viral	9	1	1
0A6A40131976	sickle cell trait	9	0.995678	1
0A6A40131845	retinal diseases	9	0.999999	1
0A6A40143099	IPF	9	0.998789	1
0A6A40146238	GI bleeding	9	0.854194	1
0A6A40133200	hemostatic disorders	9	0.173686	1
0A6A40143870	placental insufficiency	9	0.999994	1
0A6A40146797	Acute Cor Pulmonale	9	0.0180689	0.5265357
0A6A40147081	Polycythemia Vera	9	1	1
0A6A40143427	thymoma	9	1	1
0A6A40141654	scrub typhus	9	0.999105	1
0A6A40129370	small fibre neuropathy	9	0.892624	1
0A6A40142875	hypercholesterolaemia	9	1	1
0A6A40144254	metastatic clear cell renal cell carcinoma	8	1	1
0A6A40141397	Huntington's Disease	8	1	1
0A6A40132015	snoring	8	1	1
0A6A40145688	overnutrition	8	0.998911	1
0A6A40129852	brain abscess	8	1	1
0A6A40130851	Delayed hypersensitivity	8	1	1
0A6A40143460	lymphangioleiomyomatosis	8	0.976204	1
0A6A40130707	hematemesis	8	0.999656	1
0A6A40147433	Placental abruption	8	1	1
0A6A40130708	Subdural Hematoma	8	1	1
0A6A40133544	gallstones	8	1	1
0A6A40141088	aseptic meningitis	8	0.999998	1
0A6A40130104	febrile seizures	8	0.997826	1
0A6A40137243	beta thalassemia major	8	0.999933	1
0A6A40142348	disease of the respiratory system	8	0.100144	1
0A6A40131667	pneumococcal diseases	8	0.995457	1
0A6A40134208	triple-negative breast cancer	8	1	1
0A6A40137211	chronic urticaria	8	1	1
0A6A40143839	Thrombophlebitis	8	1	1
0A6A40134757	Brugada Syndrome	8	1	1
0A6A40131978	Sinus Node Dysfunction	8	0.999822	1
0A6A40139991	keratoconus	8	1	1
0A6A40147499	Anti-glomerular basement membrane disease	8	0.777162	1
0A6A40132319	vaginal bleeding	8	1	1
0A6A40138631	CORD-19	8	0.0743568	1
0A6A40135109	Omani	8	0.265159	1
0A6A40134003	anastomotic leak	8	1	1
0A6A40147288	keratoconjunctivitis	8	0.999976	1
0A6A40141152	Vogt-Koyanagi-Harada Disease	8	0.837901	1
0A6A40140837	Diabetes in Pregnancy	8	0.993096	1
0A6A40140967	Creutzfeldt-Jakob disease	8	1	1
0A6A40134461	Acute Diarrhea	8	0.99998	1
0A6A40144242	Dyslexia	8	1	1
0A6A40132183	tic disorders	8	0.601647	1
0A6A40131738	prolapse	8	1	1
0A6A40132654	cancer-related treatment	8	0.999889	1
0A6A40133728	overactive bladder	8	1	1
0A6A40142226	papilledema	8	1	1
0A6A40129644	cold agglutinin disease	8	0.283496	1
0A6A40140048	cholelithiasis	8	1	1
0A6A40130834	hyperhidrosis	8	0.999922	1
0A6A40147301	Croup	8	0.80555	1
0A6A40145384	phobia specific	8	0.52385	1
0A6A40133260	Serotonin syndrome	8	0.991552	1
0A6A40146811	gastroesophageal reflux	8	1	1
0A6A40143603	mastocytosis	8	0.999992	1
0A6A40132671	anti-phospholipid syndrome	8	0.840418	1
0A6A40141195	spinal muscular atrophy	8	1	1
0A6A40130278	indigestion	8	1	1
0A6A40131963	hemorrhagic shock	8	1	1
0A6A40130759	hepatomegaly	8	1	1
0A6A40135209	myelodysplastic syndrome	8	1	1
0A6A40133384	headache disorders	8	0.999985	1
0A6A40140997	anterior ischemic optic neuropathy	8	0.961409	1
0A6A40223154	tobacco mosaic virus	8	1	1
0A6A40133036	hyperoxia	8	1	1
0A6A40133318	paraparesis	8	0.999965	1
0A6A40143205	bursitis	8	0.999938	1
0A6A40147303	acute epiglottitis	8	0.773401	1
0A6A40131699	polyradiculoneuritis	8	0.137064	1
0A6A40131516	ACHE	8	0.12519	1
0A6A40129420	compulsive eating	8	0.874488	1
0A6A40129597	albuminuria	8	1	1
0A6A40144793	Aortic disease	8	0.874657	1
0A6A40147251	cleft lip	8	1	1
0A6A40146503	varices	8	1	1
0A6A40143465	central nervous system disease	8	1	1
0A6A40129406	social anxiety disorder	8	0.999983	1
0A6A40142305	echinococcosis	8	1	1
0A6A40132311	Genitourinary cancer	8	0.772819	1
0A6A40135365	Ductal Carcinoma in Situ	8	1	1
0A6A40133054	ventricular septal rupture	8	0.898678	1
0A6A40130828	hyperosmolar hyperglycemic state	7	0.0909309	1
0A6A40129934	common carotid artery thrombosis	7	0.592213	1
0A6A40129861	cancer of the breast	7	1	1
0A6A40135060	Cerebellar Ataxia	7	1	1
0A6A40143235	invasive ductal carcinoma	7	1	1
0A6A40133713	nocturia	7	1	1
0A6A40134553	swine influenza	7	0.888706	1
0A6A40133278	middle cerebral artery syndrome	7	1	1
0A6A40142300	personality disorder	7	1	1
0A6A40132376	voice disorders	7	0.991505	1
0A6A40136486	don	7	0.014334	0.4328868
0A6A40132178	thrombopenia	7	0.947071	1
0A6A40134256	infant death	7	0.999865	1
0A6A40135322	IgA deficiency	7	0.806559	1
0A6A40131239	mesothelioma	7	1	1
0A6A40132383	vocal cord paralysis	7	1	1
0A6A40147246	phenylketonuria	7	1	1
0A6A40141669	pulmonary sarcoidosis	7	0.999998	1
0A6A40140590	primary hyperparathyroidism	7	1	1
0A6A40142391	Ventricular Septal Defect	7	1	1
0A6A40132026	spinal cord injuries	7	1	1
0A6A40147392	Primary Ciliary Dyskinesia	7	0.97863	1
0A6A40132477	Episcleritis	7	0.41319	1
0A6A40134197	Drug reaction with eosinophilia and systemic symptoms syndrome	7	0.99955	1
0A6A40134011	neglected diseases	7	0.605061	1
0A6A40133148	premature aging	7	0.999977	1
0A6A40140522	Q-fever	7	1	1
0A6A40140192	legionellosis	7	0.999969	1
0A6A40143129	Euthyroid Sick Syndrome	7	0.0410109	1
0A6A40133158	Miller-Fisher Syndrome	7	0.343961	1
0A6A40140339	portal hypertension	7	1	1
0A6A40138894	Feb 11	7	5.51842e-08	4.457087e-06
0A6A40130890	hypoproteinemia	7	0.99928	1
0A6A40146876	Kaposi's Sarcoma	7	1	1
0A6A40143273	dyskinesia	7	1	1
0A6A40132997	Neuroendocrine Tumors	7	1	1
0A6A40143229	testicular cancer	7	1	1
0A6A40141114	Primary biliary cholangitis	7	1	1
0A6A40144144	radiculopathy	7	1	1
0A6A40141919	amenorrhea	7	1	1
0A6A40132549	ocular infections	7	0.977925	1
0A6A40133321	lithiasis	7	1	1
0A6A40140411	microcephaly	7	1	1
0A6A40143498	coronary aneurysm	7	0.259867	1
0A6A40133628	seroma	7	1	1
0A6A40129753	atrial flutter	7	1	1
0A6A40142456	cheilitis	7	0.89752	1
0A6A40140153	amblyopia	7	1	1
0A6A40133410	Neuromuscular manifestations	7	0.000295256	0.01314646
0A6A40147405	necrotizing fasciitis	7	1	1
0A6A40135118	rheumatic heart disease	7	1	1
0A6A40144801	encephalitis lethargica	7	0.0249463	0.6841728
0A6A40129363	Necrotizing pneumonia	7	0.615611	1
0A6A40145804	cleft palate	7	1	1
0A6A40146832	oropharynx cancer	7	1	1
0A6A40140098	Parotitis	7	0.995505	1
0A6A40132555	opsoclonus	7	0.997651	1
0A6A40141097	oligohydramnios	7	1	1
0A6A40147311	diabetes insipidus	7	1	1
0A6A40134073	Osteoporotic Fractures	7	1	1
0A6A40142209	geographic tongue	7	0.00586439	0.1958368
0A6A40142414	Neuroendocrine Tumor	7	1	1
0A6A40144218	folliculitis	7	0.999965	1
0A6A40143813	pituitary adenoma	7	1	1
0A6A40133068	heat stroke	7	0.988229	1
0A6A40131445	nutritional disorders	7	0.804406	1
0A6A40135127	First-degree atrioventricular block	7	0.815466	1
0A6A40142894	basal cell carcinoma	7	1	1
0A6A40143983	pancreatic adenocarcinoma	7	1	1
0A6A40129849	mild traumatic brain injury	7	1	1
0A6A40131190	maxillofacial injuries	7	0.661835	1
0A6A40137296	subjective cognitive decline	7	0.985017	1
0A6A40131701	Polyuria	7	1	1
0A6A40132692	hypocapnia	7	0.9996	1
0A6A40140627	trachoma	7	0.999999	1
0A6A40141396	chorea	7	1	1
0A6A40130052	Colic	7	1	1
0A6A40146821	Pyoderma Gangrenosum	7	0.999963	1
0A6A40133025	soft tissue infections	7	1	1
0A6A40143797	arthropathy	7	1	1
0A6A40142736	focal epilepsy	7	1	1
0A6A40134087	cardiorenal syndrome	7	0.983805	1
0A6A40135044	diffuse large B-cell lymphoma	7	1	1
0A6A40135083	PPMs	7	0.979826	1
0A6A40142728	myeloproliferative neoplasm	7	0.997406	1
0A6A40137210	limbic encephalitis	7	0.94181	1
0A6A40141541	adult brain tumor	6	1	1
0A6A40133725	dysuria	6	1	1
0A6A40147199	Barrett's Esophagus	6	1	1
0A6A40136133	kin	6	0.775507	1
0A6A40146928	genital herpes	6	1	1
0A6A40147252	orbital disease	6	0.139813	1
0A6A40133903	microscopic polyangiitis	6	0.999943	1
0A6A40131322	carditis	6	0.990967	1
0A6A40131153	macroglossia	6	0.996019	1
0A6A40142513	atrial septal defect	6	1	1
0A6A40141262	Hemolytic Uremic Syndrome	6	1	1
0A6A40140470	Acute Hemorrhagic Leukoencephalitis	6	0.00176897	0.06981401
0A6A40135620	mastoiditis	6	0.993785	1
0A6A40133764	stupor	6	0.999872	1
0A6A40131221	meningococcal disease	6	0.999999	1
0A6A40142776	obstructive lung disease	6	0.999995	1
0A6A40141250	meralgia paresthetica	6	0.150549	1
0A6A40142329	organic mental disorder	6	0.806559	1
0A6A40139952	migraine with aura	6	1	1
0A6A40140570	genital warts	6	1	1
0A6A40132058	non-convulsive status epilepticus	6	0.939412	1
0A6A40133003	cardiovascular abnormalities	6	0.999768	1
0A6A40147228	nasopharyngeal carcinoma	6	1	1
0A6A40140275	short bowel syndrome	6	1	1
0A6A40141758	magnesium deficiency	6	0.990421	1
0A6A40138346	send a	6	0.937072	1
0A6A40135474	ileitis	6	0.989035	1
0A6A40140601	Allergic conjunctivitis	6	0.999993	1
0A6A40131533	optic disc edema	6	0.930359	1
0A6A40130743	Crimean-Congo Haemorrhagic Fever	6	0.576162	1
0A6A40146906	necrotizing enterocolitis	6	1	1
0A6A40132063	oral mucositis	6	0.999999	1
0A6A40136894	Dravet syndrome	6	0.976477	1
0A6A40132368	vitreous hemorrhage	6	0.999979	1
0A6A40137308	pemphigus foliaceus	6	0.949755	1
0A6A40140882	astigmatism	6	1	1
0A6A40131856	Retinal Hemorrhage	6	0.924563	1
0A6A40145632	Tetralogy of Fallot	6	1	1
0A6A40132811	ruptured aneurysm	6	0.999833	1
0A6A40143215	anuria	6	1	1
0A6A40133783	vascular malformations	6	1	1
0A6A40141326	hereditary hemorrhagic telangiectasia	6	0.99954	1
0A6A40143743	stomach adenocarcinoma	6	1	1
0A6A40132398	wound infection	6	1	1
0A6A40134484	autoimmune polyendocrine syndrome type 1	6	0.786085	1
0A6A40147164	visceral leishmaniasis	6	1	1
0A6A40140587	hypoparathyroidism	6	1	1
0A6A40133480	mitochondrial diseases	6	1	1
0A6A40146752	vitamin B12 deficiency	6	1	1
0A6A40132455	Child malnutrition	6	0.871619	1
0A6A40146641	apical periodontitis	6	0.99571	1
0A6A40132018	Infantile Spasms	6	1	1
0A6A40140122	silicosis	6	1	1
0A6A40141764	Cholestatic Jaundice	6	1	1
0A6A40131500	otitis	6	1	1
0A6A40141915	eosinophilic esophagitis	6	0.999974	1
0A6A40137271	Acute asthma	6	1	1
0A6A40140581	acute conjunctivitis	6	0.816004	1
0A6A40142518	optic neuropathy	6	1	1
0A6A40132707	diabetic ketosis	6	0.176429	1
0A6A40130188	erythroderma	6	0.997747	1
0A6A40140453	hemiplegia	6	1	1
0A6A40129915	carcinoid tumor	6	1	1
0A6A40140825	onchocerciasis	6	0.999991	1
0A6A40140734	Constrictive Pericarditis	6	1	1
0A6A40132242	tracheoesophageal fistula	6	1	1
0A6A40132293	enteric fever	6	0.999823	1
0A6A40130614	glycosuria	6	0.994226	1
0A6A40131522	pallor	6	0.999881	1
0A6A40142794	haemochromatosis	6	1	1
0A6A40131983	drooling	6	0.999645	1
0A6A40143448	vaccinia	6	1	1
0A6A40131767	psychosomatic disorders	6	0.880826	1
0A6A40141978	precocious puberty	6	1	1
0A6A40131225	heavy menstrual bleeding	6	1	1
0A6A40143934	gastritis	6	1	1
0A6A40132170	thyroid storm	6	0.513011	1
0A6A40130655	halitosis	6	0.880954	1
0A6A40131072	leukocytopenia	6	0.907038	1
0A6A40131695	polycystic ovarian syndrome	6	1	1
0A6A40141671	urethritis	6	1	1
0A6A40130737	hemothorax	6	1	1
0A6A40140383	Japanese encephalitis	6	1	1
0A6A40135781	pollen allergy	6	0.858591	1
0A6A40135082	Phaeochromocytoma	6	1	1
0A6A40130216	Catch-22	6	0.966266	1
0A6A40134224	transfusion-associated circulatory overload	6	0.992963	1
0A6A40143528	histiocytosis	6	1	1
0A6A40142129	capillary leak syndrome	6	0.872915	1
0A6A40140919	coronary vasospasm	6	1	1
0A6A40144602	intrahepatic cholangiocarcinoma	6	1	1
0A6A40132796	Pityriasis Lichenoides Chronica	6	0.952572	1
0A6A40129551	primary adrenal insufficiency	6	0.915036	1
0A6A40130861	hypertension, renal	6	0.409858	1
0A6A40134901	extrapulmonary tuberculosis	6	0.999993	1
0A6A40141101	lymphatic filariasis	6	0.999999	1
0A6A40132837	pelvic pain	6	1	1
0A6A40129689	alogia	6	0.972475	1
0A6A40129517	ototoxicity	6	1	1
0A6A40143663	Acute Retinal Necrosis	6	0.489635	1
0A6A40129736	polyarthritis	6	1	1
0A6A40141039	pulmonary alveolar proteinosis	6	0.989168	1
0A6A40135615	acute promyelocytic leukaemia	6	1	1
0A6A40141502	BRANCH RETINAL ARTERY OCCLUSION	6	0.686525	1
0A6A40134086	peripheral nerve injuries	6	1	1
0A6A40147048	Wilson's disease	6	1	1
0A6A40142002	anal cancer	6	0.999999	1
0A6A40131275	dental diseases	6	0.9872	1
0A6A40144683	melioidosis	6	0.999998	1
0A6A40140347	mesenteric adenitis	6	0.77818	1
0A6A40130447	failure to thrive	6	1	1
0A6A40140488	corneal edema	6	0.999997	1
0A6A40145661	prion disease	6	1	1
0A6A40132792	hyperpigmentation	6	1	1
0A6A40133189	Kikuchi-Fujimoto disease	6	0.992792	1
0A6A40145231	peripheral nervous system disease	6	0.0230493	0.6404018
0A6A40132829	soft-tissue injuries	6	0.999912	1
0A6A40134177	Parental Death	6	0.959076	1
0A6A40135789	Drug allergy	6	0.993347	1
0A6A40130223	ectasia	6	0.999892	1
0A6A40130816	hydrothorax	5	0.999888	1
0A6A40146986	helminth infection	5	1	1
0A6A40142160	Hantavirus Pulmonary Syndrome	5	0.844775	1
0A6A40141920	Benign Paroxysmal Positional Vertigo	5	0.999997	1
0A6A40141076	goiter	5	1	1
0A6A40131660	pleuritis	5	0.999148	1
0A6A40140942	mononeuropathy	5	0.959497	1
0A6A40143726	plexopathy	5	0.885074	1
0A6A40132774	tick-borne infections	5	0.999307	1
0A6A40130813	hydropneumothorax	5	0.393803	1
0A6A40140396	sixth nerve palsy	5	0.773538	1
0A6A40147309	epididymitis	5	0.999937	1
0A6A40133571	Nipah virus infection	5	0.0682684	1
0A6A40145312	eosinophilic pneumonia	5	0.404796	1
0A6A40133850	usual interstitial pneumonia	5	0.970958	1
0A6A40143493	osteosarcoma	5	1	1
0A6A40133961	Pelvic Organ Prolapse	5	1	1
0A6A40140532	Neck Cancer	5	0.946755	1
0A6A40132313	hives	5	0.836707	1
0A6A40143560	brain infarction	5	0.999114	1
0A6A40140322	primary open-angle glaucoma	5	1	1
0A6A40130094	contusions	5	1	1
0A6A40132103	superior vena cava syndrome	5	0.999999	1
0A6A40146916	Viral exanthem	5	0.0515946	1
0A6A40135788	respiratory allergy	5	0.9993	1
0A6A40130251	drowning	5	1	1
0A6A40131811	phonophobia	5	0.98461	1
0A6A40130901	hypoventilation	5	0.999997	1
0A6A40147397	fasciitis	5	0.99956	1
0A6A40141969	Iritis	5	0.884531	1
0A6A40131642	pituitary diseases	5	0.657488	1
0A6A40138686	TMD	5	0.999854	1
0A6A40141765	biliary atresia	5	1	1
0A6A40132187	onychomycosis	5	1	1
0A6A40146757	corneal ulcer	5	0.990525	1
0A6A40130676	heart block	5	1	1
0A6A40139276	PSS	5	0.290184	1
0A6A40141473	Persistent Pulmonary Hypertension of the Newborn	5	1	1
0A6A40131031	laryngeal cancer	5	1	1
0A6A40147187	amoebiasis	5	1	1
0A6A40132032	somatoform disorders	5	0.98518	1
0A6A40145473	primary immunodeficiency disease	5	0.99963	1
0A6A40134022	amyloid plaques	5	1	1
0A6A40140808	hyperandrogenism	5	1	1
0A6A40131300	muscular dystrophies	5	0.999979	1
0A6A40135816	Purpura fulminans	5	0.979633	1
0A6A40143794	vaginal discharge	5	0.999997	1
0A6A40130711	hemianopia	5	0.999993	1
0A6A40134015	conditions of asymptomatic	5	0.0973247	1
0A6A40139942	viral bronchiolitis	5	0.17759	1
0A6A40131585	Marginal Ulcer	5	1	1
0A6A40133404	abnormal movements	5	1	1
0A6A40141281	posterior uveitis	5	0.976232	1
0A6A40131519	pancreatic diseases	5	0.999863	1
0A6A40133494	HPV infection	5	1	1
0A6A40145271	Ada	5	0.997209	1
0A6A40142433	retinal vascular occlusion	5	0.591651	1
0A6A40143265	paratyphoid	5	0.921793	1
0A6A40131252	spotting	5	1	1
0A6A40145097	acute pyelonephritis	5	0.999999	1
0A6A40130248	allergy, drug	5	0.998593	1
0A6A40131246	metaplasia	5	1	1
0A6A40130793	hoarseness	5	1	1
0A6A40145358	Agoraphobia	5	1	1
0A6A40142797	colon adenocarcinoma	5	1	1
0A6A40133199	neurogenic inflammation	5	0.999462	1
0A6A40130969	arthropathies	5	1	1
0A6A40132736	prion diseases	5	1	1
0A6A40129835	osteopenia	5	1	1
0A6A40130492	fever of unknown origin	5	1	1
0A6A40133144	hot flashes	5	0.999989	1
0A6A40143104	acute interstitial pneumonia	5	0.943589	1
0A6A40132559	oculomotor nerve palsy	5	0.993744	1
0A6A40135678	chilblain lupus	5	0.018193	0.5265357
0A6A40138876	cas	5	0.997278	1
0A6A40140984	Prader-Willi syndrome	5	1	1
0A6A40136122	Waldenstrom Macroglobulinemia	5	0.764006	1
0A6A40137275	chronic asthma	5	0.999997	1
0A6A40147448	proliferative vitreoretinopathy	5	1	1
0A6A40137688	ERs	5	0.861074	1
0A6A40132189	tinea	5	1	1
0A6A40133294	CNS vasculitis	5	0.999489	1
0A6A40134112	polydipsia	5	0.999997	1
0A6A40140873	iron deficiency anemia	5	1	1
0A6A40146826	collagen disease	5	0.998394	1
0A6A40132616	tooth loss	5	1	1
0A6A40131790	fixed pupils	5	0.189362	1
0A6A40145189	aortic regurgitation	5	1	1
0A6A40133953	Paget-Schroetter syndrome	5	0.894114	1
0A6A40146615	mediastinitis	5	1	1
0A6A40132200	tobacco dependence	5	0.999978	1
0A6A40133723	azotemia	5	0.999993	1
0A6A40140314	mastitis	5	1	1
0A6A40144058	cerebral thrombosis	5	0.964403	1
0A6A40132567	mydriasis	5	0.999936	1
0A6A40144866	Intestinal Disease	5	0.999996	1
0A6A40146912	cholesteatoma	5	1	1
0A6A40140609	spondyloarthropathy	5	0.950191	1
0A6A40143877	hypercortisolism	5	1	1
0A6A40144491	rapidly progressive glomerulonephritis	5	0.998776	1
0A6A40131690	polyneuropathies	5	0.981649	1
0A6A40141925	CADASIL	5	0.998279	1
0A6A40133771	Immune Reconstitution Inflammatory Syndrome	5	0.999811	1
0A6A40130686	Heartburn	5	1	1
0A6A40146772	Morphea	5	0.998338	1
0A6A40140292	interstitial nephritis	5	0.999998	1
0A6A40143719	brachial plexopathy	5	0.97122	1
0A6A40133970	laryngopharyngeal reflux	5	0.996718	1
0A6A40129416	varicella zoster virus infection	5	0.976489	1
0A6A40129739	eyestrain	5	0.93267	1
0A6A40141557	proliferative diabetic retinopathy	5	1	1
0A6A40130619	Pompe disease	5	0.999935	1
0A6A40132561	tonic pupil	5	0.115852	1
0A6A40134062	chronic liver failure	5	0.989193	1
0A6A40140509	birth asphyxia	5	0.999917	1
0A6A40133675	Postdural Puncture Headache	5	0.962426	1
0A6A40131314	myelodysplastic syndromes	5	1	1
0A6A40131460	ophthalmoparesis	5	0.934154	1
0A6A40132655	Needle-stick injuries	5	0.997796	1
0A6A40140568	Otitis Media With Effusion	5	1	1
0A6A40132162	thoracic diseases	5	0.271534	1
0A6A40131518	pancreatic insufficiency	5	0.999733	1
0A6A40133159	epiretinal membrane	5	0.999992	1
0A6A40135157	oral squamous cell carcinoma	5	1	1
0A6A40134119	pelvic floor disorders	5	0.987548	1
0A6A40141012	Rett Syndrome	5	1	1
0A6A40144613	Cholangiocarcinoma	5	1	1
0A6A40139988	sleeping sickness	5	1	1
0A6A40142049	juvenile dermatomyositis	5	0.943775	1
0A6A40133660	Chronic Pancreatitis	5	1	1
0A6A40132352	vitamin A deficiency	5	1	1
0A6A40130598	gliosis	5	1	1
0A6A40147558	muscular dystrophy	5	1	1
0A6A40142219	prostatitis	5	1	1
0A6A40132288	Tuberous sclerosis complex	5	1	1
0A6A40132802	Radiation pneumonitis	5	0.999995	1
0A6A40129445	travel-associated infections	5	0.25017	1
0A6A40129871	bronchospasm	5	1	1
0A6A40141693	scleritis	5	0.998404	1
0A6A40133965	vasoplegia	5	0.560738	1
0A6A40140805	penile cancer	5	0.999911	1
0A6A40129303	Severe Acute Malnutrition	5	0.956434	1
0A6A40130100	coronary atherosclerosis	5	1	1
0A6A40130318	fat embolism	5	0.999908	1
0A6A40129737	Aspergillus infection	5	0.871247	1
0A6A40141592	Klebsiella pneumonia	5	0.999867	1
0A6A40134181	Pneumorrhachis	5	0.692743	1
0A6A40144795	demyelinating polyneuropathy	5	0.236376	1
0A6A40147286	status asthmaticus	5	0.989448	1
0A6A40143714	Helicobacter pylori infection	5	1	1
0A6A40130815	hyperalgesia	5	1	1
0A6A40129760	Vitamin deficiency	5	0.996679	1
0A6A40140914	Clubfoot	5	0.99999	1
0A6A40133957	central serous retinopathy	5	0.999998	1
0A6A40135125	artery disease	5	0.99955	1
0A6A40132359	metamorphopsia	4	0.999986	1
0A6A40133388	herpes encephalitis	4	0.999898	1
0A6A40134474	cryptogenic organizing pneumonia	4	0.988662	1
0A6A40140909	cortical blindness	4	0.99951	1
0A6A40130261	Dupuytren's disease	4	0.999902	1
0A6A40129603	respiratory alkalosis	4	0.972698	1
0A6A40130151	pressure sore	4	0.986102	1
0A6A40131231	menstrual irregularities	4	0.999998	1
0A6A40132402	blunt injuries	4	0.887246	1
0A6A40146646	chronic rhinitis	4	0.994472	1
0A6A40134651	hypophosphatemia	4	1	1
0A6A40142473	neuritis	4	1	1
0A6A40140891	splenic sequestration	4	0.375018	1
0A6A40132778	left ventricular hypertrophy	4	1	1
0A6A40131864	rib fractures	4	0.99997	1
0A6A40132004	skull fractures	4	0.99834	1
0A6A40135329	Good's syndrome	4	0.278313	1
0A6A40144325	Ludwig's angina	4	0.63028	1
0A6A40133186	Epstein-Barr-virus infection	4	1	1
0A6A40143780	granuloma annulare	4	0.9996	1
0A6A40130825	hyperesthesia	4	0.826707	1
0A6A40143853	Lynch syndrome	4	1	1
0A6A40135233	Uterine Corpus Endometrial Carcinoma	4	0.100144	1
0A6A40129450	epithelial ovarian cancer	4	1	1
0A6A40143030	synovitis	4	1	1
0A6A40147038	atrophic gastritis	4	1	1
0A6A40134234	Idiopathic Pulmonary Arterial Hypertension	4	1	1
0A6A40132118	symptom cluster	4	0.995459	1
0A6A40134974	female breast cancer	4	0.999996	1
0A6A40146866	oral cavity cancer	4	0.99999	1
0A6A40143323	proctitis	4	1	1
0A6A40133219	sleep bruxism	4	0.756627	1
0A6A40130906	central hypothyroidism	4	1	1
0A6A40132038	splenic infarcts	4	0.131597	1
0A6A40134467	laryngotracheitis	4	0.20261	1
0A6A40143566	breast carcinoma	4	1	1
0A6A40142148	Cholinergic Urticaria	4	0.0958078	1
0A6A40146356	retinoblastoma	4	1	1
0A6A40133852	primary graft dysfunction	4	0.999347	1
0A6A40132034	splenic rupture	4	0.998487	1
0A6A40144514	cavernous hemangioma	4	1	1
0A6A40146207	Monoclonal Gammopathy of Undetermined Significance	4	0.999995	1
0A6A40131289	hypotonia	4	1	1
0A6A40129496	multifocal choroiditis	4	0.924598	1
0A6A40140451	intracranial aneurysm	4	1	1
0A6A40131672	Mycoplasma Pneumoniae Infection	4	0.998557	1
0A6A40142724	thrombocytopathy	4	0.982384	1
0A6A40133620	Cushing disease	4	0.859218	1
0A6A40146847	Acute intestinal ischemia	4	0.0987303	1
0A6A40130724	hemoperitoneum	4	0.999998	1
0A6A40141730	hyperparathyroidism	4	1	1
0A6A40142273	Sotos syndrome	4	0.825037	1
0A6A40141966	bipolar I disorder	4	1	1
0A6A40129314	hoarding disorder	4	0.384427	1
0A6A40146239	Peptic Ulcer Disease	4	1	1
0A6A40143057	Epidermolysis bullosa	4	0.99998	1
0A6A40137208	polymyositis	4	1	1
0A6A40147307	epididymo-orchitis	4	0.981496	1
0A6A40129545	acute-phase reaction	4	0.928889	1
0A6A40142917	Splenic Abscess	4	0.930009	1
0A6A40147067	autosomal dominant polycystic kidney disease	4	1	1
0A6A40132335	Uterine Rupture	4	1	1
0A6A40132151	tendon injuries	4	0.999996	1
0A6A40132057	staphylococcal infections	4	1	1
0A6A40130171	Dental Plaque	4	1	1
0A6A40145606	metabolic encephalopathy	4	0.952904	1
0A6A40144789	obstructive uropathy	4	1	1
0A6A40144488	ASM	4	0.861074	1
0A6A40141228	secondary hyperparathyroidism	4	1	1
0A6A40130942	intestinal diseases	4	0.999988	1
0A6A40130772	herpes simplex virus infection	4	1	1
0A6A40144250	macular degeneration	4	0.999999	1
0A6A40134739	restless legs syndrome	4	1	1
0A6A40141450	Carotid Stenosis	4	1	1
0A6A40133088	Fournier's gangrene	4	0.999856	1
0A6A40141670	Cardiac Sarcoidosis	4	0.997768	1
0A6A40144259	cystoid macular edema	4	1	1
0A6A40141113	beta thalassemia	4	0.995174	1
0A6A40134123	disease resistance	4	1	1
0A6A40140029	papillitis	4	0.988029	1
0A6A40133080	ischaemic optic neuropathy	4	0.928224	1
0A6A40129471	maternal obesity	4	1	1
0A6A40131247	migraine headache	4	0.999998	1
0A6A40143858	Lung Carcinoma	4	1	1
0A6A40132373	vulvar cancer	4	0.999813	1
0A6A40129885	bundle branch block	4	0.999996	1
0A6A40140667	Lemierre's syndrome	4	0.977317	1
0A6A40143038	hemopneumothorax	4	0.474273	1
0A6A40132019	spinal cord compression	4	1	1
0A6A40140277	glucose intolerance	4	1	1
0A6A40132430	colorectal tumors	4	1	1
0A6A40141641	fibrodysplasia ossificans progressiva	4	0.986317	1
0A6A40137128	B-cell acute lymphoblastic leukemia	4	0.999943	1
0A6A40135473	Clostridium difficile colitis	4	0.999999	1
0A6A40133277	choroidal neovascularization	4	1	1
0A6A40135602	Lung abscess	4	0.999922	1
0A6A40130682	heart injuries	4	0.1464	1
0A6A40133647	postpartum thyroiditis	4	0.397543	1
0A6A40147278	developmental dysplasia of the hip	4	0.999998	1
0A6A40132769	norovirus infections	4	0.94983	1
0A6A40141957	alcoholic cirrhosis	4	1	1
0A6A40147266	lymphangitis	4	0.905812	1
0A6A40133683	delayed graft function	4	1	1
0A6A40143531	carotid artery disease	4	0.99999	1
0A6A40131056	Hansen's disease	4	0.912167	1
0A6A40129512	bone marrow failure	4	1	1
0A6A40144458	multiple system atrophy	4	1	1
0A6A40141331	Friedreich ataxia	4	1	1
0A6A40133639	labor pain	4	0.972406	1
0A6A40130048	clostridium difficile infection	4	1	1
0A6A40141644	Megaloblastic Anemia	4	0.999259	1
0A6A40140401	premature labor	4	0.999986	1
0A6A40130273	dysmenorrhea	4	1	1
0A6A40141209	central diabetes insipidus	4	0.999954	1
0A6A40132145	thalassemias	4	0.985631	1
0A6A40145626	PML	4	1	1
0A6A40134096	intra-abdominal infections	4	0.990525	1
0A6A40140287	rickets	4	1	1
0A6A40130480	fecal incontinence	4	1	1
0A6A40142784	metastatic carcinoma	4	1	1
0A6A40147423	systolic heart failure	4	0.999992	1
0A6A40129723	arteriovenous malformations	4	1	1
0A6A40141127	congenital adrenal hyperplasia	4	1	1
0A6A40141839	epiphora	4	0.999972	1
0A6A40129683	aortic rupture	4	0.999693	1
0A6A40141524	crescentic glomerulonephritis	4	0.99999	1
0A6A40142921	dentoalveolar abscess	4	0.92565	1
0A6A40133966	binge-eating disorder	4	0.723632	1
0A6A40133676	secondary headache disorders	4	0.946755	1
0A6A40133709	disorders of lipid metabolism	4	0.979991	1
0A6A40146841	Burkitt lymphoma	4	1	1
0A6A40130091	Contracture	4	1	1
0A6A40141007	cryptococcal meningitis	4	0.99998	1
0A6A40134107	breast pain	4	0.998865	1
0A6A40147429	Pulmonary emphysema	4	1	1
0A6A40131398	neurasthenia	4	0.554139	1
0A6A40136792	polycystic kidney disease	4	1	1
0A6A40129836	bone resorption	4	1	1
0A6A40130341	encephalitis, acute necrotizing	4	0.000179369	0.008196691
0A6A40131099	Liver Abscess	4	1	1
0A6A40133686	Postherpetic Neuralgia	4	0.999934	1
0A6A40140753	Budd-Chiari syndrome	4	0.999997	1
0A6A40130015	chicken-pox	4	0.563836	1
0A6A40129983	middle cerebral artery aneurysm	4	1	1
0A6A40141327	hyperprolactinemia	4	1	1
0A6A40141459	viral hemorrhagic fever	4	0.999996	1
0A6A40141177	Alcoholic hepatitis	4	0.999964	1
0A6A40140115	pneumoconiosis	4	1	1
0A6A40131842	restless leg syndrome	4	0.997192	1
0A6A40140781	retinal vasculitis	4	0.998955	1
0A6A40140540	thrombocytopenia secondary	4	0.861074	1
0A6A40131905	sadism	4	0.141149	1
0A6A40134347	Streptococcus pneumonia	4	0.532979	1
0A6A40138755	multicentric Castleman disease	4	0.76573	1
0A6A40130147	Cytomegalovirus infections	4	0.999999	1
0A6A40141169	chronic schizophrenia	4	1	1
0A6A40138774	Acquired von Willebrand Syndrome	4	0.842849	1
0A6A40130668	head-and-neck cancer	4	0.999998	1
0A6A40130511	Flatus	4	1	1
0A6A40135904	primary sclerosing cholangitis	4	1	1
0A6A40133613	fulminant hepatitis	4	1	1
0A6A40147620	Peripartum cardiomyopathy	4	0.998593	1
0A6A40142966	papilloma	4	1	1
0A6A40137405	acute flaccid myelitis	4	0.100111	1
0A6A40133336	mononeuropathies	4	0.734507	1
0A6A40129427	opium addiction	4	0.713676	1
0A6A40131953	sensory disorders	4	0.512787	1
0A6A40133116	paradoxical embolism	4	0.999814	1
0A6A40129394	hypophysitis	4	0.818514	1
0A6A40133009	leukocytoclastic cutaneous vasculitis	4	0.876711	1
0A6A40141874	patent ductus arteriosus	4	1	1
0A6A40142361	adenitis	4	1	1
0A6A40139134	PMC	4	0.92565	1
0A6A40129490	choroidal detachment	4	0.9969	1
0A6A40129331	waterborne diseases	4	0.770558	1
0A6A40134802	Roseola infantum	4	0.525024	1
0A6A40133115	pancreatic necrosis	4	0.999993	1
0A6A40131304	muscle spasticity	3	1	1
0A6A40147339	otitis externa	3	0.998359	1
0A6A40133832	acute radiation syndrome	3	0.921389	1
0A6A40133419	sleep-wake transition disorders	3	0.268892	1
0A6A40141854	Addison's disease	3	1	1
0A6A40130333	tonsillar herniation	3	0.999998	1
0A6A40130691	ventricular septal defects	3	0.999982	1
0A6A40144727	ovarian cyst	3	0.999997	1
0A6A40143105	nonspecific interstitial pneumonia	3	0.882372	1
0A6A40147006	molluscum contagiosum	3	0.999954	1
0A6A40132090	SID	3	0.997599	1
0A6A40142404	septal defect	3	1	1
0A6A40147174	Achalasia	3	1	1
0A6A40133300	CIDP	3	0.28398	1
0A6A40147290	Orbital Myositis	3	0.651041	1
0A6A40144155	Marburg hemorrhagic fever	3	0.139541	1
0A6A40137393	AL amyloidosis	3	0.999999	1
0A6A40147004	actinic keratosis	3	1	1
0A6A40136432	rmed	3	2.79118e-05	0.001468753
0A6A40135372	Estrogen Receptor Positive Breast Cancer	3	0.999981	1
0A6A40130911	impulse control disorders	3	0.998035	1
0A6A40130766	herpes labialis	3	0.678794	1
0A6A40143770	cervical squamous cell carcinoma	3	0.999987	1
0A6A40146819	malignant hyperthermia	3	1	1
0A6A40129935	carotid atherosclerosis	3	1	1
0A6A40131547	parakeratosis	3	0.997841	1
0A6A40133233	sleep terrors	3	0.472453	1
0A6A40141105	dengue hemorrhagic fever	3	1	1
0A6A40130358	Enuresis	3	1	1
0A6A40147133	Rapid eye movement sleep behavior disorder	3	0.999998	1
0A6A40142828	neonatal jaundice	3	1	1
0A6A40131608	periodontal pocket	3	0.999945	1
0A6A40130867	hypertension, pulmonary	3	0.00468921	0.1612438
0A6A40130244	diverticulum	3	1	1
0A6A40131757	pseudorabies	3	0.795339	1
0A6A40131507	middle-ear effusion	3	0.999964	1
0A6A40147908	neural tube defects	3	1	1
0A6A40143169	membranoproliferative glomerulonephritis	3	0.999994	1
0A6A40146851	scarlet fever	3	0.999997	1
0A6A40136590	myoglobinuria	3	0.991409	1
0A6A40147438	tenosynovitis	3	0.999999	1
0A6A40142057	spermatogenic failure	3	1	1
0A6A40141153	Incontinentia pigmenti	3	0.985017	1
0A6A40133091	post-partum depression	3	0.783884	1
0A6A40142208	glossitis	3	0.9458	1
0A6A40134905	AAAS	3	0.999808	1
0A6A40133566	severe acute respiratory syndrome (SARS)	3	0.000258642	0.01166576
0A6A40131751	Prurigo	3	0.99969	1
0A6A40131121	obstructive lung diseases	3	0.945928	1
0A6A40130221	hepatobiliary diseases	3	0.999993	1
0A6A40129401	surgical incision	3	1	1
0A6A40140263	Charcot-Marie-Tooth disease	3	1	1
0A6A40133870	residual block	3	0.839682	1
0A6A40135228	endocervical adenocarcinoma	3	0.670922	1
0A6A40132784	acneiform eruptions	3	0.0850533	1
0A6A40129393	fracture-dislocation	3	0.999997	1
0A6A40131850	retinal tears	3	0.99947	1
0A6A40134469	Desquamative Interstitial Pneumonia	3	0.509149	1
0A6A40129600	alcohol addiction	3	0.994329	1
0A6A40133316	acute vestibular neuritis	3	0.439708	1
0A6A40142535	hypogonadotropic hypogonadism	3	1	1
0A6A40145800	spinal stenosis	3	1	1
0A6A40142071	fragile X syndrome	3	1	1
0A6A40130670	conductive hearing loss	3	1	1
0A6A40143548	Thrombosis of Carotid Artery	3	0.910124	1
0A6A40130536	pathological fractures	3	1	1
0A6A40140364	filariasis	3	1	1
0A6A40142040	frozen shoulder	3	0.999221	1
0A6A40129824	bone diseases	3	1	1
0A6A40133339	Foot Drop	3	0.999997	1
0A6A40144443	Calciphylaxis	3	0.990661	1
0A6A40133160	Chronic Hepatitis B Virus Infection	3	1	1
0A6A40142496	mononeuritis multiplex	3	0.93064	1
0A6A40146334	macular hole	3	1	1
0A6A40141299	Hiatus Hernia	3	1	1
0A6A40132693	herpes simplex keratitis	3	0.988279	1
0A6A40142446	mitral valve stenosis	3	1	1
0A6A40132724	common variable immune deficiency	3	0.90949	1
0A6A40147142	cutaneous leishmaniasis	3	1	1
0A6A40130098	corneal diseases	3	0.944531	1
0A6A40139989	intracranial abscess	3	0.654409	1
0A6A40143164	Streptococcus infection	3	0.985725	1
0A6A40143904	Merkel cell carcinoma	3	1	1
0A6A40131417	neuroses	3	0.999999	1
0A6A40146882	duodenitis	3	0.999772	1
0A6A40141026	Trigeminal Neuralgia	3	1	1
0A6A40129917	carcinoma in situ	3	1	1
0A6A40130778	hirsutism	3	1	1
0A6A40142808	West Nile fever	3	0.788355	1
0A6A40134448	dengue shock syndrome	3	0.932764	1
0A6A40130920	SIADH	3	0.91622	1
0A6A40139159	OHS	3	0.636323	1
0A6A40133803	plasma cell neoplasms	3	0.522772	1
0A6A40137257	autoimmune myocarditis	3	0.967543	1
0A6A40146741	paralytic ileus	3	0.999749	1
0A6A40134936	Transthyretin Amyloidosis	3	0.999978	1
0A6A40140142	chronic leukemia	3	0.99231	1
0A6A40130974	renal calculi	3	1	1
0A6A40143168	cryoglobulinemia	3	0.999999	1
0A6A40143814	congenital diaphragmatic hernia	3	1	1
0A6A40130496	fibromuscular dysplasia	3	0.999984	1
0A6A40140834	cardiac tumor	3	0.985949	1
0A6A40134130	Invasive pulmonary fusariosis	3	0.962909	1
0A6A40140752	autonomic neuropathy	3	1	1
0A6A40145125	T-Cell Acute Lymphoblastic Leukemia	3	1	1
0A6A40130543	Fuchs endothelial corneal dystrophy	3	0.98418	1
0A6A40141903	malignant pleural effusion	3	0.999993	1
0A6A40131627	Obesity hypoventilation syndrome	3	0.993079	1
0A6A40131787	pulmonary stenosis	3	1	1
0A6A40142314	panniculitis	3	0.99984	1
0A6A40142461	Munchausen syndrome	3	0.947292	1
0A6A40129687	antisocial personality	3	0.861831	1
0A6A40129485	Avoidant restrictive food intake disorder	3	0.811508	1
0A6A40129526	hypochlorhydria	3	0.988724	1
0A6A40146780	retinal artery occlusion	3	0.970583	1
0A6A40129956	phlegmon	3	0.98214	1
0A6A40147514	hyperopia	3	1	1
0A6A40143542	cerebritis	3	0.90821	1
0A6A40134148	vascular calcification	3	1	1
0A6A40129981	cerebrospinal fluid rhinorrhea	3	0.991067	1
0A6A40147352	dacryoadenitis	3	0.74764	1
0A6A40139985	Cysticercosis	3	1	1
0A6A40138748	pPROM	3	0.989451	1
0A6A40141927	Interstitial Cystitis	3	1	1
0A6A40133987	injuries of vascular system	3	0.999999	1
0A6A40136495	spina bifida	3	1	1
0A6A40130835	hyperkinetic movements	3	0.995376	1
0A6A40142018	ureterolithiasis	3	0.853861	1
0A6A40131389	minimal change glomerulopathy	3	0.995174	1
0A6A40144164	burning mouth syndrome	3	0.967828	1
0A6A40141205	Shigellosis	3	1	1
0A6A40143725	brachial plexus neuritis	3	0.396444	1
0A6A40140870	borreliosis	3	0.93766	1
0A6A40139904	central precocious puberty	3	0.999956	1
0A6A40132009	snakebites	3	0.999999	1
0A6A40133980	periprosthetic fractures	3	0.998602	1
0A6A40130688	Valvular Heart Diseases	3	0.973357	1
0A6A40134860	West syndrome	3	0.999865	1
0A6A40136836	igg4-related disease	3	0.999996	1
0A6A40143864	lung squamous cell carcinoma	3	1	1
0A6A40135072	paraganglioma	3	1	1
0A6A40147249	language disorder	3	0.999006	1
0A6A40147503	polyarteritis nodosa	3	1	1
0A6A40142400	Spontaneous tension pneumothorax	3	0.0250187	0.6841728
0A6A40130305	Eisenmenger syndrome	3	0.996916	1
0A6A40142246	propionic acidemia	3	0.85454	1
0A6A40137314	paraneoplastic pemphigus	3	0.944557	1
0A6A40141756	vitamin C deficiency	3	0.984664	1
0A6A40132771	right ventricular hypertrophy	3	1	1
0A6A40145561	combined immunodeficiency	3	0.999835	1
0A6A40129561	adenovirus infections	3	0.987514	1
0A6A40143101	bronchiolitis obliterans	3	1	1
0A6A40146919	mycosis fungoides	3	1	1
0A6A40130029	cytogenetic abnormalities	3	1	1
0A6A40140589	opioid abuse	3	0.996255	1
0A6A40146790	impetigo	3	0.997908	1
0A6A40130446	Lower motor neuron facial palsy	3	0.986977	1
0A6A40142795	Leukoerythroblastosis	3	0.425471	1
0A6A40144543	adenoid cystic carcinoma	3	1	1
0A6A40135531	stuttering	3	1	1
0A6A40144981	variant creutzfeldt-jakob disease	3	1	1
0A6A40143144	Adenomyosis	3	1	1
0A6A40129648	stenocardia	3	1	1
0A6A40144785	ureteral obstruction	3	1	1
0A6A40135448	body dysmorphic disorder	3	0.999615	1
0A6A40140832	acute apical periodontitis	3	0.479649	1
0A6A40140073	pleurisy	3	0.999998	1
0A6A40134358	autoimmune vasculitis	3	0.184921	1
0A6A40147565	chalazion	3	0.946179	1
0A6A40129397	Surgical Margins	3	1	1
0A6A40141438	hereditary spherocytosis	3	0.999997	1
0A6A40138903	Feb 1	3	3.39344e-06	0.0001964236
0A6A40132031	spinal diseases	3	0.93779	1
0A6A40130431	eye injuries	3	0.999997	1
0A6A40142892	Takayasu arteritis	3	1	1
0A6A40130357	enterovirus infections	3	0.918671	1
0A6A40130586	Tourette's syndrome	3	0.999936	1
0A6A40136639	Tricuspid Atresia	3	0.998671	1
0A6A40142955	laryngeal carcinoma	3	1	1
0A6A40131824	refractive errors	3	1	1
0A6A40132606	T-cell lymphoma	3	1	1
0A6A40142107	Marfan syndrome	3	1	1
0A6A40143518	liposarcoma	3	1	1
0A6A40147444	tendinitis	3	0.99793	1
0A6A40133564	glucose metabolism disorder	3	0.989451	1
0A6A40143325	Hepatic porphyria	3	0.929658	1
0A6A40133662	atherogenesis	3	1	1
0A6A40144257	renal papillary cell carcinoma	3	0.99978	1
0A6A40132809	thoracoabdominal aortic aneurysm	3	0.999829	1
0A6A40143712	pericoronitis	3	0.90821	1
0A6A40147087	SIDS	3	1	1
0A6A40147065	subacute sclerosing panencephalitis	3	0.999636	1
0A6A40132569	Anisocoria	3	0.99627	1
0A6A40135300	C1 inhibitor deficiency	3	0.956044	1
0A6A40130855	disorders of excessive somnolence	3	0.999956	1
0A6A40135358	Non-Bacterial Thrombotic Endocarditis	3	0.485703	1
0A6A40141822	scurvy	3	0.999141	1
0A6A40144053	mutism	3	0.996092	1
0A6A40147221	gastrointestinal stromal tumor	3	1	1
0A6A40142325	pleural disease	3	0.955523	1
0A6A40140920	Coronary artery anomaly	3	0.803363	1
0A6A40147015	chorioretinitis	3	0.999778	1
0A6A40141312	blastomycosis	3	0.999915	1
0A6A40134455	systemic mycosis	3	0.732253	1
0A6A40129649	mycotic aneurysm	3	0.999944	1
0A6A40147463	diabetic neuropathy	3	1	1
0A6A40133108	Ebola infection	3	0.996572	1
0A6A40144783	aortitis	3	0.997253	1
0A6A40135134	cervical dystonia	3	1	1
0A6A40133534	acute stress disorders	3	0.000546849	0.02288201
0A6A40138902	Feb 10	3	0.00415849	0.1458832
0A6A40130663	hearing disorders	3	0.999606	1
0A6A40130281	dyspareunia	3	1	1
0A6A40134948	atrioventricular canal defect	3	0.999903	1
0A6A40145227	ovarian serous Cystadenocarcinoma	3	0.956883	1
0A6A40143675	central nervous system tumors	3	1	1
0A6A40142380	central nervous system tuberculosis	3	0.96604	1
0A6A40129702	aphonia	3	0.438205	1
0A6A40134486	Cutaneous lupus erythematosus	3	0.987819	1
0A6A40129376	human remains	3	1	1
0A6A40142196	Reye syndrome	3	0.998821	1
0A6A40144619	reactive depression	3	1	1
0A6A40129602	alkalosis	3	1	1
0A6A40133376	spinal cord ischemia	3	0.99998	1
0A6A40140471	postinfectious encephalitis	3	0.0908768	1
0A6A40147602	substance-dependence	3	1	1
0A6A40142125	pyuria	3	0.999198	1
0A6A40131365	congenital disorders	3	0.999795	1
0A6A40129487	univentricular heart	3	0.964611	1
0A6A40135409	thoracic disease	3	0.519385	1
0A6A40131377	Radiation-induced cancer	3	0.793515	1
0A6A40131166	mycetoma	3	0.99986	1
0A6A40135536	scoliosis	3	1	1
0A6A40136501	physical disorder	3	1	1
0A6A40142772	motor neuron disease	3	1	1
0A6A40143440	monkeypox	3	0.976489	1
0A6A40140706	choroiditis	3	0.87367	1
0A6A40145211	optic atrophy	3	1	1
0A6A40146295	Psychotic Depression	3	0.989592	1
0A6A40143583	mixed connective tissue disease	3	0.999898	1
0A6A40141464	transient global amnesia	3	0.951943	1
0A6A40133513	hyperamylasemia	3	0.996858	1
0A6A40133223	jet lag	3	0.955292	1
0A6A40135154	renal fibrosis	3	1	1
0A6A40129492	meibomian gland dysfunction	3	0.971664	1
0A6A40135549	gallbladder disease	3	0.99989	1
0A6A40129434	smoldering multiple myeloma	3	0.855108	1
0A6A40143936	mouth disease	3	0.999779	1
0A6A40129503	Sudden Unexpected Death in Epilepsy	3	0.999802	1
0A6A40134940	PCa	3	0.999367	1
0A6A40130028	haemophilia B	3	0.998289	1
0A6A40133745	opsoclonus myoclonus syndrome	3	0.887442	1
0A6A40141437	lagophthalmos	3	0.983695	1
0A6A40141888	Multiple cranial nerve palsies	3	0.397543	1
0A6A40135600	Angular cheilitis	3	0.771161	1
0A6A40131418	neurosyphilis	3	1	1
0A6A40133624	liver insufficiency	3	0.999944	1
0A6A40132637	foot ulcer	3	0.99876	1
0A6A40137310	pemphigoid	3	0.998155	1
0A6A40130166	caries, dental	3	0.999982	1
0A6A40129953	cataplexy	3	0.999986	1
0A6A40132171	thyroiditis, subacute	3	0.00794421	0.2531215
0A6A40131817	radiculitis	3	0.999969	1
0A6A40134362	livedoid vasculopathy	3	0.490172	1
0A6A40144045	secondary syphilis	3	0.998775	1
0A6A40135025	autosomal dominant disease	2	0.999994	1
0A6A40132721	post-infectious arthritis	2	0.999559	1
0A6A40133369	parkinsonian syndromes	2	1	1
0A6A40141986	Cerebral Malaria	2	1	1
0A6A40145684	plasma cell dyscrasia	2	0.999965	1
0A6A40141141	aniridia	2	0.999881	1
0A6A40141814	premature ejaculation	2	0.999966	1
0A6A40130283	hydatid cyst	2	1	1
0A6A40131926	catatonic schizophrenia	2	0.758019	1
0A6A40131258	mitral valve regurgitation	2	1	1
0A6A40145057	gastric carcinoma	2	1	1
0A6A40131960	serum sickness	2	0.973199	1
0A6A40142470	malignant mesothelioma	2	1	1
0A6A40146302	congenital abnormality	2	0.999971	1
0A6A40137623	deficiency of noradrenaline	2	0.259419	1
0A6A40133702	Niemann-Pick disease type C	2	0.999184	1
0A6A40146745	volvulus	2	1	1
0A6A40135124	second-degree atrioventricular block	2	0.969532	1
0A6A40133416	Diffuse axonal injury	2	0.999833	1
0A6A40133605	spinal epidural hematoma	2	0.8893	1
0A6A40143679	congenital myasthenic syndrome	2	0.765164	1
0A6A40129916	DCIS	2	0.999978	1
0A6A40133117	Porcine Reproductive and Respiratory Syndrome	2	0.996259	1
0A6A40140379	voyeurism	2	0.115193	1
0A6A40141321	Gynecomastia	2	1	1
0A6A40130153	Bends	2	1	1
0A6A40131825	cancer of the rectum	2	1	1
0A6A40132022	muscle spasm	2	0.998854	1
0A6A40146872	nervous system disease	2	0.862789	1
0A6A40142673	tularemia	2	1	1
0A6A40140721	exotropia	2	0.999977	1
[truncated: 1,475 more rows]

## Sheet: Table S4b
Supplementary Table S4b. A list of diseases significantly co-occurring with COVID-19, reconstructed with ANDDigest
Number	Object id	Object label	Documents Number	Co-occurrence Score	FDR (< 0.05)
1	0A6A40137468	severe COVID-19	4584	2.08593e-08	3.496523e-06
2	0A6A40145045	Pneumonia	3944	7.00031e-08	4.968849e-06
3	0A6A40130497	fever	3396	2.77321e-08	3.506271e-06
4	0A6A40140705	acute respiratory distress syndrome	2600	3.20772e-08	3.593681e-06
5	0A6A40143184	SARS	2573	1.65303e-08	3.496523e-06
6	0A6A40130071	infectious diseases	2524	3.42188e-08	3.627905e-06
7	0A6A40146764	influenza	2431	3.36938e-09	2.689255e-06
8	0A6A40147270	viral infection	2336	3.68056e-08	3.627905e-06
9	0A6A40130279	breathlessness	1935	4.75682e-08	4.236009e-06
10	0A6A40130456	fatigue	1738	1.01457e-08	3.203274e-06
11	0A6A40140562	respiratory failure	1628	8.96238e-09	3.203274e-06
12	0A6A40136128	thrombosis	1210	4.23309e-08	3.973384e-06
13	0A6A40133022	disease progression	886	0.00011785	0.005606754
14	0A6A40134019	acute kidney injury	800	5.46861e-08	4.457087e-06
15	0A6A40129667	anosmia	780	7.44441e-09	3.203274e-06
16	0A6A40130031	chronic disease	677	4.98221e-08	4.325804e-06
17	0A6A40131841	respiratory tract infections	674	6.50747e-09	3.203274e-06
18	0A6A40130931	insomnia	632	2.97046e-08	3.506271e-06
19	0A6A40137315	long covid	617	2.53135e-08	3.496523e-06
20	0A6A40131403	Neurological manifestations	591	1.06059e-09	2.689255e-06
21	0A6A40133882	lung injury	506	3.76057e-08	3.627905e-06
22	0A6A40130085	confusion	481	2.61761e-08	3.496523e-06
23	0A6A40133823	venous thromboembolism	446	3.02874e-08	3.506271e-06
24	0A6A40130005	chest pain	356	1.42962e-05	0.0007757922
25	0A6A40146774	disseminated mucormycosis	354	8.39831e-08	5.719084e-06
26	0A6A40137121	Middle East respiratory syndrome	335	2.57637e-08	3.496523e-06
27	0A6A40141398	Guillain-Barre syndrome	327	1.56556e-08	3.496523e-06
28	0A6A40129585	Ageusia	313	3.01442e-08	3.506271e-06
29	0A6A40141642	Kawasaki Disease	309	6.00872e-08	4.536584e-06
30	0A6A40131669	pulmonary inflammation	297	2.96462e-06	0.0001745106
31	0A6A40130124	cross infection	283	1.83023e-08	3.496523e-06
32	0A6A40133157	hypercoagulability	276	2.11245e-08	3.496523e-06
33	0A6A40130161	Delirium	269	6.37427e-08	4.710179e-06
34	0A6A40129409	Work-related stress	218	9.28776e-09	3.203274e-06
35	0A6A40132174	thromboembolism	213	2.42761e-08	3.496523e-06
36	0A6A40133876	Acute Lung Injury	201	7.29657e-06	0.0004087256
37	0A6A40140184	Common Cold	182	4.57462e-08	4.180962e-06
38	0A6A40130271	dysgeusia	172	3.87166e-09	2.689255e-06
39	0A6A40132013	sneezing	161	5.88038e-08	4.536584e-06
40	0A6A40142499	diabetic ketoacidosis	155	6.64551e-05	0.003250684
41	0A6A40132417	zoonoses	149	3.47814e-08	3.627905e-06
42	0A6A40133056	Arthralgia	147	0.00107189	0.04379616
43	0A6A40145483	lymphocytopenia	136	0.000319496	0.01404569
44	0A6A40131195	pneumomediastinum	136	1.85979e-08	3.496523e-06
45	0A6A40130097	convalescence	124	2.51385e-08	3.496523e-06
46	0A6A40129320	Vicarious traumatization	121	2.01784e-09	2.689255e-06
47	0A6A40132071	moral injury	118	8.79271e-08	5.761714e-06
48	0A6A40133872	macrophage activation syndrome	110	3.56557e-09	2.689255e-06
49	0A6A40142351	immune thrombocytopenia	106	2.46348e-08	3.496523e-06
50	0A6A40132001	skin manifestations	105	8.18053e-09	3.203274e-06
51	0A6A40129996	chilblains	101	7.01047e-08	4.968849e-06
52	0A6A40129469	vaccine preventable diseases	100	5.25178e-08	4.448642e-06
53	0A6A40129386	ST elevation myocardial infarction	99	1.37682e-05	0.0007589993
54	0A6A40131780	pulmonary thromboembolism	93	1.12281e-07	7.221332e-06
55	0A6A40134446	hemophagocytic lymphohistiocytosis	89	1.95257e-06	0.0001169185
56	0A6A40132419	superinfection	89	2.33071e-08	3.496523e-06
57	0A6A40129740	asthenia	88	1.49397e-08	3.496523e-06
58	0A6A40134082	tachypnea	79	7.24913e-08	5.035246e-06
59	0A6A40143880	Acute myocarditis	79	5.65618e-08	4.464526e-06
60	0A6A40145618	ADEM	73	3.17481e-05	0.001645689
61	0A6A40131307	musculoskeletal diseases	63	1.64891e-06	0.0001004678
62	0A6A40137205	transverse myelitis	62	0.000604206	0.02498104
63	0A6A40129304	psychological trauma	51	1.65996e-08	3.496523e-06
64	0A6A40129777	barotrauma	47	9.50167e-05	0.004583236
65	0A6A40137068	coronavirus infectious disease	39	8.57284e-08	5.725668e-06
66	0A6A40134349	bacterial sepsis	35	0.000140674	0.006602173
67	0A6A40140210	influenza pneumonia	35	3.49618e-06	0.000199053
68	0A6A40138906	Feb	32	3.70932e-08	3.627905e-06
69	0A6A40130458	Mental fatigue	28	6.33111e-05	0.003141135
70	0A6A40129306	symptom worsening	26	6.34935e-07	3.937731e-05
71	0A6A40141425	Miller Fisher syndrome	25	0.000361945	0.01571294
72	0A6A40133780	livedo reticularis	22	0.000370497	0.01588563
73	0A6A40140251	critical illness myopathy	21	0.00121478	0.04905734
74	0A6A40129880	occupational burnout	20	0.000158715	0.007349563
75	0A6A40130441	facial dermatoses	16	3.33071e-07	2.103192e-05
76	0A6A40143264	taste disorder	15	0.000409248	0.01733315
77	0A6A40129446	Imported Infections	14	3.98136e-05	0.002033421
78	0A6A40130160	Delta infection	11	2.76625e-05	0.001468753
79	0A6A40131885	RNA virus infections	10	4.52563e-05	0.0022779
80	0A6A40138894	Feb 11	7	5.51842e-08	4.457087e-06
81	0A6A40133410	Neuromuscular manifestations	7	0.000295256	0.01314646
82	0A6A40130341	encephalitis, acute necrotizing	4	0.000179369	0.008196691
83	0A6A40136432	rmed	3	2.79118e-05	0.001468753
	0A6A40133566	severe acute respiratory syndrome (SARS)	3	0.000258642	0.01166576
